# Supplementary material for: A new method to analyze and understand molecular linear and nonlinear optical responses via field-induced functions: a straightforward alternative to sum-over-states (SOS) analysis
Source: Royal Society of Chemistry journal article supplement (doi:10.1039/c8cp07362g), 2019-01-01
Supplement: c8cp07362g1.pdf [file c8cp07362g1.pdf]

Supporting Information:  
A New Method to Analyze and Understand  
Molecular Linear and Nonlinear Responses via  
Field-Induced Functions. A Straightforward  
Alternative to Sum-Over-States (SOS)  
Analysis

Nicolás Otero,<sup>†</sup> Panagiotis Karamanis,<sup>‡</sup> and Marcos Mandado<sup>\*,†</sup>

<sup>†</sup>*Department of Physical Chemistry, University of Vigo, As Lagoas-Marcosende s/n, 36310.  
Vigo, Spain*

<sup>‡</sup>*Équipe Chimie-Physique (ECP), Institut des Sciences Analytiques et de Physico-chimie  
pour l'Environnement et les Matériaux (IPREM) UMR 5254, Technopole Helioparc, 2  
avenue du Président Pierre Angot, 64053. Pau Cedex 09, France)*

E-mail: mandado@uvigo.es

# Contents

|          |                                                                                          |             |
|----------|------------------------------------------------------------------------------------------|-------------|
| <b>1</b> | <b>Description of the ESI</b>                                                            | <b>S-7</b>  |
|          | <b>References</b>                                                                        | <b>S-9</b>  |
| <b>2</b> | <b>Molecular polarizability and 1<sup>st</sup> hyperpolarizability tensor components</b> | <b>S-10</b> |
| <b>3</b> | <b>HHe<sup>+</sup></b>                                                                   | <b>S-19</b> |
| 3.1      | 6-311G(d,p) . . . . .                                                                    | S-19        |
| 3.1.1    | Plots . . . . .                                                                          | S-19        |
| 3.1.2    | Contributions from excited states (TDDFT) . . . . .                                      | S-20        |
| 3.1.3    | Contributions from excited states (CIS) . . . . .                                        | S-21        |
| 3.2      | 6-311G++(d,p) . . . . .                                                                  | S-24        |
| 3.2.1    | Plots . . . . .                                                                          | S-24        |
| 3.2.2    | Contributions from excited states (TDDFT) . . . . .                                      | S-24        |
| 3.2.3    | Contributions from excited states (CIS) . . . . .                                        | S-27        |
| <b>4</b> | <b>N<sub>2</sub></b>                                                                     | <b>S-30</b> |
| 4.1      | 6-311G(d,p) . . . . .                                                                    | S-30        |
| 4.1.1    | Plots . . . . .                                                                          | S-30        |
| 4.2      | 6-311++G(d,p) . . . . .                                                                  | S-31        |
| 4.2.1    | Plots . . . . .                                                                          | S-31        |
| <b>5</b> | <b>HF</b>                                                                                | <b>S-32</b> |
| 5.1      | 6-311G(d,p) . . . . .                                                                    | S-32        |
| 5.1.1    | Plots . . . . .                                                                          | S-32        |
| 5.1.2    | Contributions from excited states (TDDFT) . . . . .                                      | S-33        |
| 5.1.3    | Contributions from excited states (CIS) . . . . .                                        | S-36        |
| 5.2      | 6-311++G(d,p) . . . . .                                                                  | S-41        |

|          |                                                     |             |
|----------|-----------------------------------------------------|-------------|
| 5.2.1    | Plots . . . . .                                     | S-41        |
| 5.2.2    | Contributions from excited states (TDDFT) . . . . . | S-41        |
| 5.2.3    | Contributions from excited states (CIS) . . . . .   | S-48        |
| <b>6</b> | <b>HCl</b>                                          | <b>S-56</b> |
| 6.1      | 6-311G(d,p) . . . . .                               | S-56        |
| 6.1.1    | Plots . . . . .                                     | S-56        |
| 6.2      | 6-311++G(d,p) . . . . .                             | S-57        |
| 6.2.1    | Plots . . . . .                                     | S-57        |
| <b>7</b> | <b>H<sub>2</sub>O</b>                               | <b>S-58</b> |
| 7.1      | 6-311G(d,p) . . . . .                               | S-58        |
| 7.1.1    | Plots . . . . .                                     | S-58        |
| 7.1.2    | Contributions from excited states (TDDFT) . . . . . | S-59        |
| 7.1.3    | Contributions from excited states (CIS) . . . . .   | S-64        |
| 7.2      | 6-311++G(d,p) . . . . .                             | S-71        |
| 7.2.1    | Plots . . . . .                                     | S-71        |
| 7.2.2    | Contributions from excited states (TDDFT) . . . . . | S-71        |
| 7.2.3    | Contributions from excited states (CIS) . . . . .   | S-81        |
| <b>8</b> | <b>H<sub>2</sub>S</b>                               | <b>S-92</b> |
| 8.1      | 6-311G(d,p) . . . . .                               | S-92        |
| 8.1.1    | Plots . . . . .                                     | S-92        |
| 8.1.2    | Contributions from excited states (TDDFT) . . . . . | S-93        |
| 8.1.3    | Contributions from excited states (CIS) . . . . .   | S-99        |
| 8.2      | 6-311++G(d,p) . . . . .                             | S-105       |
| 8.2.1    | Plots . . . . .                                     | S-105       |
| 8.2.2    | Contributions from excited states (TDDFT) . . . . . | S-105       |
| 8.2.3    | Contributions from excited states (CIS) . . . . .   | S-112       |

|           |                          |              |
|-----------|--------------------------|--------------|
| <b>9</b>  | <b>NH<sub>3</sub></b>    | <b>S-119</b> |
| 9.1       | 6-311G(d,p) . . . . .    | S-119        |
| 9.1.1     | Plots . . . . .          | S-119        |
| 9.2       | 6-311++G(d,p) . . . . .  | S-120        |
| 9.2.1     | Plots . . . . .          | S-120        |
| <b>10</b> | <b>F-CC-H</b>            | <b>S-121</b> |
| 10.1      | 6-311G(d,p) . . . . .    | S-121        |
| 10.1.1    | Plots . . . . .          | S-121        |
| 10.2      | 6-311++G(d,p) . . . . .  | S-122        |
| 10.2.1    | Plots . . . . .          | S-122        |
| <b>11</b> | <b>HCCCF<sub>3</sub></b> | <b>S-123</b> |
| 11.1      | 6-311G(d,p) . . . . .    | S-123        |
| 11.1.1    | Plots . . . . .          | S-123        |
| 11.2      | 6-311++G(d,p) . . . . .  | S-125        |
| 11.2.1    | Plots . . . . .          | S-125        |
| <b>12</b> | <b>CN-CC-H</b>           | <b>S-127</b> |
| 12.1      | 6-311G(d,p) . . . . .    | S-127        |
| 12.1.1    | Plots . . . . .          | S-127        |
| 12.2      | 6-311++G(d,p) . . . . .  | S-129        |
| 12.2.1    | Plots . . . . .          | S-129        |
| <b>13</b> | <b>CN-CC-CC-H</b>        | <b>S-131</b> |
| 13.1      | 6-311G(d,p) . . . . .    | S-131        |
| 13.1.1    | Plots . . . . .          | S-131        |
| 13.2      | 6-311++G(d,p) . . . . .  | S-133        |
| 13.2.1    | Plots . . . . .          | S-133        |

|                                                            |              |
|------------------------------------------------------------|--------------|
| <b>14 CN-CC-CC-CC-H</b>                                    | <b>S-135</b> |
| 14.1 6-311G(d,p) . . . . .                                 | S-135        |
| 14.1.1 Plots . . . . .                                     | S-135        |
| 14.2 6-311++G(d,p) . . . . .                               | S-137        |
| 14.2.1 Plots . . . . .                                     | S-137        |
| <b>15 <i>p</i>-cyanoaniline</b>                            | <b>S-139</b> |
| 15.1 6-311G(d,p) . . . . .                                 | S-139        |
| 15.1.1 Plots . . . . .                                     | S-139        |
| 15.2 6-311++G(d,p) . . . . .                               | S-141        |
| 15.2.1 Plots . . . . .                                     | S-141        |
| <b>16 <i>p</i>-nitroaniline</b>                            | <b>S-143</b> |
| 16.1 6-311G(d,p) . . . . .                                 | S-143        |
| 16.1.1 Plots . . . . .                                     | S-143        |
| 16.1.2 Contributions from excited states (TDDFT) . . . . . | S-144        |
| 16.1.3 Contributions from excited states (CIS) . . . . .   | S-147        |
| 16.2 6-311++G(d,p) . . . . .                               | S-152        |
| 16.2.1 Plots . . . . .                                     | S-152        |
| 16.2.2 Contributions from excited states (TDDFT) . . . . . | S-153        |
| 16.2.3 Contributions from excited states (CIS) . . . . .   | S-156        |
| <b>17 <i>m</i>-nitroaniline</b>                            | <b>S-161</b> |
| 17.1 6-311G(d,p) . . . . .                                 | S-161        |
| 17.1.1 Plots . . . . .                                     | S-161        |
| <b>18 <i>p</i>-methoxy-nitrobenzene</b>                    | <b>S-163</b> |
| 18.1 6-311G(d,p) . . . . .                                 | S-163        |
| 18.1.1 Plots . . . . .                                     | S-163        |

|        |                                                     |       |
|--------|-----------------------------------------------------|-------|
| 18.1.2 | Contributions from excited states (TDDFT) . . . . . | S-164 |
| 18.1.3 | Contributions from excited states (CIS) . . . . .   | S-167 |
| 18.2   | 6-311++G(d,p) . . . . .                             | S-172 |
| 18.2.1 | Plots . . . . .                                     | S-172 |
| 18.2.2 | Contributions from excited states (TDDFT) . . . . . | S-173 |
| 18.2.3 | Contributions from excited states (CIS) . . . . .   | S-176 |

# 1 Detailed description of the electronic supporting information

This electronic supporting information (ESI) contains two kinds of information:

- Plots with the representations of the variation of a component of the polarizability,  $\alpha$ , or one of the 1<sup>st</sup> hyperpolarizability,  $\beta$ , with respect to the number of molecular orbitals (MOs) or excited states, depending on the approach considered. If it is not said otherwise, the principal axis is considered along  $z$  direction.

Each figure is formed by four subfigures, except  $N_2$  molecule, whose full  $\beta$  tensor is zero. Subfigures (a) and (c) were obtained by means of our field-induced orbital (FIO) decomposition and summed over the number of MOs. For  $\alpha$ , three approaches were considered: coupled perturbed Kohn-Sham (CPKS), coupled perturbed Hartree-Fock (CPHF) and uncoupled perturbed Hartree-Fock (UPHF). In the case of  $\beta$ , only CPKS and CPHF approaches were taken into account.

The values shown in subfigures (b) and (d) were computed through the TDDFT and CIS *sum over states* method (SOS) as implemented in Multiwfn.<sup>S1</sup> In the case of larger molecules, the number of excited states considered to compute the (hyper)polarizabilities were truncated to a value of 1500.

In addition to the four subfigures and caused by the enormous number of states and MOs, subfigures (e) and (f) of benzene derivatives, the series of molecules based on  $CN-C\equiv C-H$  as well as  $H-C\equiv C-CF_3$  are also included with a shorten range on the  $x$  axis to observe the most important variations.

The plots were obtained at CAM-B3LYP and HF approaches combined in both cases with 6-311G(d,p) and 6-311++G(d,p) basis sets for the optimized structures. The FIOs and SOS results of these basis sets are included in the corresponding subsections, as can be seen in the table of contents. Since the FIOs and TDDFT-SOS approaches

are independent of the functional to be considered, CAM-B3LYP was employed due to the well-known results obtained in calculations of (hyper)polarizabilities.<sup>S2-S6</sup> The first derivative of the density matrices with respect to an uniform electric field was obtained analytically from the corresponding Gaussian calculations.<sup>S7</sup> On the contrary, the second derivative was computed by the symmetric numerical definition of the finite field (FF) approach with an electric field strength of 0.001 au.

In all cases, the recomputed total values of the corresponding component are included in plots (a)–(d).

- Outputs from our either TDDFT (CAM-B3LYP) or CIS calculations of the molecules commented in the main text of the work, *i.e.*, the following set of molecules are shown: **HHe<sup>+</sup>** (Subsections 3.1.2 and 3.1.3), **HF** (Subsections 5.1.2 and 5.1.3), **H<sub>2</sub>O** (Subsections 7.1.2 and 7.1.3), **H<sub>2</sub>S** (Subsections 8.1.2 and 8.1.3), **p-nitroaniline** (Subsections 16.1.2 and 16.1.3), **m-nitroaniline** (Subsections ?? and ??) and **p-methoxy-nitrobenzene** (Subsections 18.1.2 and 18.1.3). These outputs, considering the aforementioned two basis sets, are formed by a truncated set of excited states (except HHe<sup>+</sup>, the full number of excited states was printed) adequate to represent the most important contributions to recover the final SOS value (see the corresponding figures of the same section and read the main text of the work). The symmetry determined by Gaussian 09 (`symm`), the energy (`Exc.E`), the oscillator strength (`Osc.Strength`), the transition dipole moment (`f`) and  $\langle S^2 \rangle$  (`<S**2>`) are included together with the main excited configurations ordered by the five first largest and the five first lowest CI coefficients. In the last line of each excited state, the number of nonnegligible excited configurations with respect to the CI coefficient (`#CIs`), as well as the number of positive (`#CIs>0`) and negative (`#CIs<0`) values considered to obtain the SOS plots are shown.



## References

- (S1) Lu, T.; Chen, F. Multiwfn: A multifunctional wavefunction analyzer. *J. Comput. Chem.* **2012**, *33*, 580–592.
- (S2) Yanai, T.; Tew, D. P.; Handy, N. C. A new hybrid exchange–correlation functional using the Coulomb-attenuating method (CAM-B3LYP). *Chem. Phys. Lett.* **2004**, *393*, 51–57.
- (S3) Xenides, D.; Karamanis, P.; Pouchan, C. A critical analysis of the performance of new generation functionals on the calculation of the (hyper) polarizabilities of clusters of varying stoichiometry: Test case the  $\text{Si}_m\text{Ge}_n$  ( $m + n = 7$ ,  $n = 0 - 7$ ) clusters. *Chem. Phys. Lett.* **2010**, *498*, 134–139.
- (S4) Karamanis, P.; Pouchan, C.; Weatherford, C. A.; Gutsev, G. L. Evolution of properties in prolate  $(\text{GaAs})_n$  clusters. *J. Phys. Chem. C* **2011**, *115*, 97–107.
- (S5) Karamanis, P.; Marchal, R.; Carbonnière, P.; Pouchan, C. Doping-enhanced hyperpolarizabilities of silicon clusters: A global ab initio and density functional theory study of  $\text{Si}_{10}(\text{Li}, \text{Na}, \text{K})_n$  ( $n = 1, 2$ ) clusters. *J. Chem. Phys.* **2011**, *135*, 044511.
- (S6) Karamanis, P. The importance of the DFT method on the computation of the second hyperpolarizability of semiconductor clusters of increasing size: A critical analysis on prolate aluminum phosphide clusters. *Int. J. Quantum Chem.* **2012**, *112*, 2115–2125.
- (S7) Otero, N.; Alsenoy, C. V.; Pouchan, C.; Karamanis, P. Hirshfeld-based intrinsic polarizability density representations as a tool to analyze molecular polarizability. *J. Comput. Chem.* **2015**, *36*, 1831–1843.

## 2 Molecular polarizability and 1<sup>st</sup> hyperpolarizability tensor components

Table S1: Tensor components of polarizability  $\alpha$  of the molecules considered in this work. 1 CAM-B3LYP/6-311G\*\*, 2 CAM-B3LYP/6-311++G\*, 3 HF/6-311G\*\*, 4 HF/6-311++G\*\*

| Molecule         | Level | $\alpha_{XX}$ | $\alpha_{XY}$ | $\alpha_{YY}$ | $\alpha_{XZ}$ | $\alpha_{YZ}$ | $\alpha_{ZZ}$ |
|------------------|-------|---------------|---------------|---------------|---------------|---------------|---------------|
| HHe <sup>+</sup> | 1     | 0.62          | 0.00          | 0.62          | 0.00          | 0.00          | 1.62          |
|                  | 2     | 0.62          | 0.00          | 0.62          | 0.00          | 0.00          | 1.63          |
|                  | 3     | 0.60          | 0.00          | 0.60          | 0.00          | 0.00          | 1.46          |
|                  | 4     | 0.60          | 0.00          | 0.60          | 0.00          | 0.00          | 1.46          |
| N <sub>2</sub>   | 1     | 6.05          | 0.00          | 6.05          | 0.00          | 0.00          | 13.66         |
|                  | 2     | 7.81          | 0.00          | 7.81          | 0.00          | 0.00          | 15.23         |
|                  | 3     | 5.73          | 0.00          | 5.73          | 0.00          | 0.00          | 13.68         |
|                  | 4     | 7.00          | 0.00          | 7.00          | 0.00          | 0.00          | 14.66         |
| CO               | 1     | 8.61          | 0.00          | 8.61          | 0.00          | 0.00          | 13.04         |
|                  | 2     | 9.92          | 0.00          | 9.92          | 0.00          | 0.00          | 15.27         |
|                  | 3     | 8.23          | 0.00          | 8.23          | 0.00          | 0.00          | 12.45         |
|                  | 4     | 9.06          | 0.00          | 9.06          | 0.00          | 0.00          | 14.01         |
| LiF              | 1     | 7.33          | 0.00          | 7.33          | 0.00          | 0.00          | 8.08          |
|                  | 2     | 7.31          | 0.00          | 7.31          | 0.00          | 0.00          | 9.31          |
|                  | 3     | 4.84          | 0.00          | 4.84          | 0.00          | 0.00          | 5.64          |
|                  | 4     | 5.17          | 0.00          | 5.17          | 0.00          | 0.00          | 6.58          |
| HF               | 1     | 1.82          | 0.00          | 1.82          | 0.00          | 0.00          | 4.58          |
|                  | 2     | 2.82          | 0.00          | 2.82          | 0.00          | 0.00          | 5.05          |
|                  | 3     | 1.70          | 0.00          | 1.70          | 0.00          | 0.00          | 4.15          |
|                  | 4     | 2.32          | 0.00          | 2.32          | 0.00          | 0.00          | 4.42          |

*Continued on next page*

Table S1 – *Continued from previous page*

| Molecule           | Level | $\alpha_{XX}$ | $\alpha_{XY}$ | $\alpha_{YY}$ | $\alpha_{XZ}$ | $\alpha_{YZ}$ | $\alpha_{ZZ}$ |
|--------------------|-------|---------------|---------------|---------------|---------------|---------------|---------------|
| HCl                | 1     | 6.82          | 0.00          | 6.82          | 0.00          | 0.00          | 13.32         |
|                    | 2     | 9.43          | 0.00          | 9.43          | 0.00          | 0.00          | 13.48         |
|                    | 3     | 6.56          | 0.00          | 6.56          | 0.00          | 0.00          | 12.82         |
|                    | 4     | 8.70          | 0.00          | 8.70          | 0.00          | 0.00          | 12.95         |
| H <sub>2</sub> O   | 1     | 4.02          | 0.00          | 7.66          | 0.00          | 0.00          | 5.83          |
|                    | 2     | 6.81          | 0.00          | 8.21          | 0.00          | 0.00          | 6.76          |
|                    | 3     | 3.77          | 0.00          | 7.08          | 0.00          | 0.00          | 5.28          |
|                    | 4     | 5.50          | 0.00          | 7.42          | 0.00          | 0.00          | 5.85          |
| H <sub>2</sub> S   | 1     | 11.59         | 0.00          | 18.52         | 0.00          | 0.00          | 17.27         |
|                    | 2     | 19.27         | 0.00          | 18.64         | 0.00          | 0.00          | 17.31         |
|                    | 3     | 11.24         | 0.00          | 18.19         | 0.00          | 0.00          | 16.15         |
|                    | 4     | 17.99         | 0.00          | 18.31         | 0.00          | 0.00          | 16.17         |
| NH <sub>3</sub>    | 1     | 10.18         | 0.00          | 10.18         | 0.00          | 0.00          | 7.89          |
|                    | 2     | 10.95         | 0.00          | 10.95         | 0.00          | 0.00          | 12.89         |
|                    | 3     | 9.65          | 0.00          | 9.65          | 0.00          | 0.00          | 7.38          |
|                    | 4     | 10.19         | 0.00          | 10.19         | 0.00          | 0.00          | 10.70         |
| F–CC–H             | 1     | 10.43         | 0.00          | 10.43         | 0.00          | 0.00          | 30.09         |
|                    | 2     | 13.09         | 0.00          | 13.09         | 0.00          | 0.00          | 32.28         |
|                    | 3     | 10.21         | 0.00          | 10.21         | 0.00          | 0.00          | 28.49         |
|                    | 4     | 12.51         | 0.00          | 12.51         | 0.00          | 0.00          | 29.96         |
| HCCCF <sub>3</sub> | 1     | 20.33         | 0.00          | 20.33         | 0.00          | 0.00          | 43.04         |
|                    | 2     | 25.83         | 0.00          | 25.83         | 0.00          | 0.00          | 47.35         |
|                    | 3     | 18.88         | 0.00          | 18.88         | 0.00          | 0.00          | 39.89         |
|                    | 4     | 42.88         | 0.00          | 23.26         | 0.00          | 0.00          | 23.26         |

*Continued on next page*

Table S1 – *Continued from previous page*

| Molecule               | Level | $\alpha_{XX}$ | $\alpha_{XY}$ | $\alpha_{YY}$ | $\alpha_{XZ}$ | $\alpha_{YZ}$ | $\alpha_{ZZ}$ |
|------------------------|-------|---------------|---------------|---------------|---------------|---------------|---------------|
| CN–CC–H                | 1     | 15.74         | 0.00          | 15.74         | 0.00          | 0.00          | 63.21         |
|                        | 2     | 18.53         | 0.00          | 18.53         | 0.00          | 0.00          | 65.17         |
|                        | 3     | 15.50         | 0.00          | 15.50         | 0.00          | 0.00          | 59.87         |
|                        | 4     | 18.04         | 0.00          | 18.04         | 0.00          | 0.00          | 63.11         |
| CN–CC–CC–H             | 1     | 22.20         | 0.00          | 22.20         | 0.00          | 0.00          | 135.18        |
|                        | 2     | 26.54         | 0.00          | 26.54         | 0.00          | 0.00          | 142.87        |
|                        | 3     | 22.03         | 0.00          | 22.03         | 0.00          | 0.00          | 121.44        |
|                        | 4     | 25.87         | 0.00          | 25.87         | 0.00          | 0.00          | 126.60        |
| CN–CC–CC–CC–H          | 1     | 28.56         | 0.00          | 28.56         | 0.00          | 0.00          | 236.59        |
|                        | 2     | 34.28         | 0.00          | 34.28         | 0.00          | 0.00          | 247.52        |
|                        | 3     | 28.46         | 0.00          | 28.46         | 0.00          | 0.00          | 201.60        |
|                        | 4     | 33.62         | 0.00          | 33.62         | 0.00          | 0.00          | 208.47        |
| <i>p</i> –cyanoaniline | 1     | 37.39         | –0.31         | 138.11        | 0.00          | 0.00          | 81.57         |
|                        | 2     | 51.43         | 0.17          | 147.59        | 0.00          | 0.00          | 86.80         |
|                        | 3     | 37.25         | –0.51         | 126.22        | 0.00          | 0.00          | 78.37         |
|                        | 4     | 50.36         | –0.09         | 133.04        | 0.00          | 0.00          | 83.05         |
| <i>p</i> –cyanoaniline | 1     | 81.57         | 0.00          | 37.39         | 0.00          | –0.31         | 138.11        |
|                        | 2     | 86.80         | 0.00          | 51.43         | 0.00          | 0.17          | 147.59        |
|                        | 3     | 78.37         | 0.00          | 37.25         | 0.00          | –0.51         | 126.22        |
|                        | 4     | 83.05         | 0.00          | 50.36         | 0.00          | –0.09         | 133.04        |
| <i>p</i> –nitroaniline | 1     | 91.94         | 0.00          | 36.12         | 0.00          | 0.25          | 131.30        |
|                        | 2     | 98.17         | 0.00          | 50.40         | 0.00          | –0.20         | 143.48        |
|                        | 3     | 88.50         | 0.00          | 35.99         | 0.00          | 0.44          | 115.25        |
|                        | 4     | 93.83         | 0.00          | 49.25         | 0.00          | 0.05          | 122.90        |

*Continued on next page*

Table S1 – *Continued from previous page*

| Molecule                       | Level | $\alpha_{XX}$ | $\alpha_{XY}$ | $\alpha_{YY}$ | $\alpha_{XZ}$ | $\alpha_{YZ}$ | $\alpha_{ZZ}$ |
|--------------------------------|-------|---------------|---------------|---------------|---------------|---------------|---------------|
| <i>m</i> -nitroaniline         | 1     | 95.68         | 18.61         | 44.15         | -1.38         | -12.71        | 109.43        |
|                                | 2     |               |               |               |               |               |               |
|                                | 3     | 78.01         | 27.89         | 57.77         | 2.74          | -12.20        | 98.47         |
|                                | 4     |               |               |               |               |               |               |
| <i>p</i> -methoxy-nitrobenzene | 1     | 44.02         | 0.00          | 96.90         | 0.00          | 2.02          | 137.08        |
|                                | 2     | 56.62         | 0.00          | 103.91        | 0.00          | 1.37          | 147.44        |
|                                | 3     | 43.18         | 0.00          | 93.02         | 0.00          | 2.07          | 122.03        |
|                                | 4     | 55.18         | 0.00          | 98.91         | 0.00          | 1.81          | 128.82        |

Table S2: Nonzero tensor components of the 1<sup>st</sup> hyperpolarizability  $\beta$  of the molecules considered in this work. 1  
CAM-B3LYP/6-311G\*\*, 2 CAM-B3LYP/6-311++G\*, 3 HF/6-311G\*\*, 4 HF/6-311++G\*\*

| Molecule         | Level | $\beta_{xxx}$ | $\beta_{xxy}$ | $\beta_{xyy}$ | $\beta_{yyy}$ | $\beta_{xxz}$ | $\beta_{xyz}$ | $\beta_{yyz}$ | $\beta_{xzz}$ | $\beta_{yzz}$ |
|------------------|-------|---------------|---------------|---------------|---------------|---------------|---------------|---------------|---------------|---------------|
| HHe <sup>+</sup> | 1     | 0.00          | 0.00          | 0.00          | 0.00          | 0.12          | 0.00          | 0.12          | 0.00          | 0.00          |
|                  | 2     | 0.00          | 0.00          | 0.00          | 0.00          | 0.12          | 0.00          | 0.12          | 0.00          | 0.00          |
|                  | 3     | 0.00          | 0.00          | 0.00          | 0.00          | 0.11          | 0.00          | 0.11          | 0.00          | 0.00          |
|                  | 4     | 0.00          | 0.00          | 0.00          | 0.00          | 0.12          | 0.00          | 0.12          | 0.00          | 0.00          |
| CO               | 1     | 0.00          | 0.00          | 0.00          | 0.00          | -0.64         | 0.00          | -0.64         | 0.00          | 0.00          |
|                  | 2     | 0.00          | 0.00          | 0.00          | 0.00          | 4.05          | 0.00          | 4.05          | 0.00          | 0.00          |
|                  | 3     | 0.00          | 0.00          | 0.00          | 0.00          | -1.06         | 0.00          | -1.06         | 0.00          | 0.00          |
|                  | 4     | 0.00          | 0.00          | 0.00          | 0.00          | 1.98          | 0.00          | 1.98          | 0.00          | 0.00          |
| LiF              | 1     | 0.00          | 0.00          | 0.00          | 0.00          | 73.27         | 0.00          | 73.27         | 0.00          | 0.00          |
|                  | 2     | 0.00          | 0.00          | 0.00          | 0.00          | 50.88         | 0.00          | 50.88         | 0.00          | 0.00          |
|                  | 3     | 0.00          | 0.00          | 0.00          | 0.00          | 32.53         | 0.00          | 32.53         | 0.00          | 0.00          |
|                  | 4     | 0.00          | 0.00          | 0.00          | 0.00          | 22.48         | 0.00          | 22.48         | 0.00          | 0.00          |
| HF               | 1     | 0.00          | 0.00          | 0.00          | 0.00          | 2.42          | 0.00          | 2.42          | 0.00          | 0.00          |
|                  | 2     | 0.00          | 0.00          | 0.00          | 0.00          | 0.28          | 0.00          | 0.28          | 0.00          | 0.00          |

*Continued*

Table S2 – Continued from previous page

| Molecule         | Level | $\beta_{xxx}$ | $\beta_{xxy}$ | $\beta_{xyx}$ | $\beta_{yyy}$ | $\beta_{xzz}$ | $\beta_{xyz}$ | $\beta_{yyz}$ | $\beta_{xzz}$ | $\beta_{yzz}$ |
|------------------|-------|---------------|---------------|---------------|---------------|---------------|---------------|---------------|---------------|---------------|
| HCl              | 3     | 0.00          | 0.00          | 0.00          | 0.00          | 1.55          | 0.00          | 1.55          | 0.00          | 0.00          |
|                  | 4     | 0.00          | 0.00          | 0.00          | 0.00          | -0.05         | 0.00          | -0.05         | 0.00          | 0.00          |
|                  | 1     | 0.00          | 0.00          | 0.00          | 0.00          | 7.57          | 0.00          | 7.57          | 0.00          | 0.00          |
|                  | 2     | 0.00          | 0.00          | 0.00          | 0.00          | -0.75         | 0.00          | -0.75         | 0.00          | 0.00          |
| H <sub>2</sub> O | 3     | 0.00          | 0.00          | 0.00          | 0.00          | 5.27          | 0.00          | 5.27          | 0.00          | 0.00          |
|                  | 4     | 0.00          | 0.00          | 0.00          | 0.00          | -1.48         | 0.00          | -1.48         | 0.00          | 0.00          |
|                  | 1     | 0.00          | 0.00          | 0.00          | 0.00          | 4.41          | 0.00          | 18.81         | 0.00          | 0.00          |
|                  | 2     | 0.00          | 0.00          | 0.00          | 0.00          | 3.04          | 0.00          | 17.76         | 0.00          | 0.00          |
| H <sub>2</sub> S | 3     | 0.00          | 0.00          | 0.00          | 0.00          | 2.63          | 0.00          | 15.71         | 0.00          | 0.00          |
|                  | 4     | 0.00          | 0.00          | 0.00          | 0.00          | 0.04          | 0.00          | 14.49         | 0.00          | 0.00          |
|                  | 1     | 0.00          | 0.00          | 0.00          | 0.00          | 6.76          | 0.00          | 17.74         | 0.00          | 0.00          |
|                  | 2     | 0.00          | 0.00          | 0.00          | 0.00          | 0.16          | 0.00          | 30.68         | 0.00          | 0.00          |
| NH <sub>3</sub>  | 3     | 0.00          | 0.00          | 0.00          | 0.00          | 3.91          | 0.00          | 19.92         | 0.00          | 0.00          |
|                  | 4     | 0.00          | 0.00          | 0.00          | 0.00          | -2.40         | 0.00          | 29.41         | 0.00          | 0.00          |
|                  | 1     | 0.00          | 20.36         | 0.00          | -20.36        | 15.50         | 0.00          | 15.50         | 0.00          | 0.00          |
|                  | 2     | 0.00          | 16.26         | 0.00          | -16.24        | 0.90          | 0.00          | 0.90          | 0.00          | 0.00          |
|                  | 3     | 0.00          | 18.34         | 0.00          | -18.34        | 12.44         | 0.00          | 12.44         | 0.00          | 0.00          |

Continued on

Table S2 – Continued from previous page

| Molecule           | Level | $\beta_{xxx}$ | $\beta_{xxy}$ | $\beta_{xyx}$ | $\beta_{yyy}$ | $\beta_{xxz}$ | $\beta_{xyz}$ | $\beta_{yyz}$ | $\beta_{xzz}$ | $\beta_{yzz}$ |
|--------------------|-------|---------------|---------------|---------------|---------------|---------------|---------------|---------------|---------------|---------------|
| F-CC-H             | 4     | 0.00          | 15.57         | 0.00          | -15.57        | 2.99          | 0.00          | 2.99          | 0.00          | 0.00          |
|                    | 1     | 0.00          | 0.00          | 0.00          | 0.00          | 1.28          | 0.00          | 1.28          | 0.00          | 0.00          |
|                    | 2     | 0.00          | 0.00          | 0.00          | 0.00          | 13.29         | 0.00          | 13.29         | 0.00          | 0.00          |
|                    | 3     | 0.00          | 0.00          | 0.00          | 0.00          | -0.05         | 0.00          | -0.05         | 0.00          | 0.00          |
| HCCCF <sub>3</sub> | 4     | 0.00          | 0.00          | 0.00          | 0.00          | 7.95          | 0.00          | 7.95          | 0.00          | 0.00          |
|                    | 1     | 0.00          | -3.96         | 0.00          | 3.96          | -16.42        | 0.00          | -16.42        | 0.00          | 0.00          |
|                    | 2     | 0.00          | -9.46         | 0.00          | 9.45          | -11.65        | 0.00          | -11.64        | 0.00          | 0.00          |
|                    | 3     | 0.00          | -2.71         | 0.00          | 2.71          | -11.78        | 0.00          | -11.78        | 0.00          | 0.00          |
| CN-CC-H            | 4     | 0.00          | -3.43         | -7.02         | 3.43          | -8.42         | 0.00          | -8.42         | 0.00          | 7.02          |
|                    | 1     | 0.00          | 0.00          | 0.00          | 0.00          | 9.45          | 0.00          | 9.45          | 0.00          | 0.00          |
|                    | 2     | 0.00          | 0.00          | 0.00          | 0.00          | 9.23          | 0.00          | 9.23          | 0.00          | 0.00          |
|                    | 3     | 0.00          | 0.00          | 0.00          | 0.00          | 10.16         | 0.00          | 10.16         | 0.00          | 0.00          |
| CN-CC-CC-H         | 4     | 0.00          | 0.00          | 0.00          | 0.00          | 11.58         | 0.00          | 11.58         | 0.00          | 0.00          |
|                    | 1     | 0.00          | 0.00          | 0.00          | 0.00          | 12.16         | 0.00          | 12.16         | 0.00          | 0.00          |
|                    | 2     | 0.00          | 0.00          | 0.00          | 0.00          | 17.70         | 0.00          | 17.70         | 0.00          | 0.00          |
|                    | 3     | 0.00          | 0.00          | 0.00          | 0.00          | 12.58         | 0.00          | 12.58         | 0.00          | 0.00          |
|                    | 4     | 0.00          | 0.00          | 0.00          | 0.00          | 17.46         | 0.00          | 17.46         | 0.00          | 0.00          |

Continued on



Table S2 – Continued from previous page

| Molecule                       | Level | $\beta_{xxx}$ | $\beta_{xxy}$ | $\beta_{xyy}$ | $\beta_{yyy}$ | $\beta_{xxz}$ | $\beta_{xyz}$ | $\beta_{yyz}$ | $\beta_{xzz}$ | $\beta_{yzz}$ |
|--------------------------------|-------|---------------|---------------|---------------|---------------|---------------|---------------|---------------|---------------|---------------|
| CN-CC-CC-CC-H                  | 1     | 0.00          | 0.00          | 0.00          | 0.00          | 14.11         | 0.00          | 14.11         | 0.00          | 0.00          |
|                                | 2     | 0.00          | 0.00          | 0.00          | 0.00          | 24.09         | 0.00          | 24.09         | 0.00          | 0.00          |
|                                | 3     | 0.00          | 0.00          | 0.00          | 0.00          | 14.15         | 0.00          | 14.15         | 0.00          | 0.00          |
|                                | 4     | 0.00          | 0.00          | 0.00          | 0.00          | 21.85         | 0.00          | 21.85         | 0.00          | 0.00          |
| <i>p</i> -cyanoaniline         | 1     | 0.00          | 4.22          | 0.00          | 3.63          | -94.92        | 0.00          | -14.54        | 0.00          | 28.60         |
|                                | 2     | 0.00          | 3.20          | 0.00          | 9.11          | -84.28        | 0.00          | -44.47        | 0.00          | 7.34          |
|                                | 3     | 0.00          | 4.44          | 0.00          | 3.42          | -100.81       | 0.00          | -14.12        | 0.00          | 23.41         |
|                                | 4     | 0.00          | 4.48          | 0.00          | 9.30          | -96.13        | 0.00          | -31.04        | 0.00          | 5.61          |
| <i>p</i> -nitroaniline         | 1     | 0.00          | -3.71         | 0.00          | -3.22         | -143.65       | 0.00          | -15.50        | 0.00          | -28.53        |
|                                | 2     | 0.00          | -2.31         | 0.00          | -7.68         | -142.01       | 0.00          | -60.12        | 0.00          | -10.54        |
|                                | 3     | 0.00          | -4.04         | 0.00          | -3.18         | -165.83       | 0.00          | -10.48        | 0.00          | -22.73        |
|                                | 4     | 0.00          | -3.50         | 0.00          | -8.39         | -174.41       | 0.00          | -37.66        | 0.00          | -7.14         |
| <i>m</i> -nitroaniline         | 1     | -17.72        | -31.14        | -50.88        | -87.01        | 13.48         | 33.60         | 74.67         | -57.98        | 16.35         |
|                                | 2     |               |               |               |               |               |               |               |               |               |
|                                | 3     | -47.85        | -44.53        | -43.13        | -49.85        | 20.89         | 21.95         | 16.41         | -33.82        | 11.14         |
|                                | 4     |               |               |               |               |               |               |               |               |               |
| <i>p</i> -methoxy-nitrobenzene | 1     | 0.00          | -33.44        | 0.00          | 7.09          | -37.53        | 0.00          | -113.23       | 0.00          | -82.49        |

Continued on

Table S2 – Continued from previous page

| Molecule | Level | $\beta_{xxx}$ | $\beta_{xxy}$ | $\beta_{xyy}$ | $\beta_{yyy}$ | $\beta_{xxz}$ | $\beta_{xyz}$ | $\beta_{yyz}$ | $\beta_{xzz}$ | $\beta_{yzz}$ |
|----------|-------|---------------|---------------|---------------|---------------|---------------|---------------|---------------|---------------|---------------|
|          | 2     | 0.00          | -30.04        | 0.00          | 2.45          | -39.28        | 0.00          | -110.52       | 0.00          | -105.12       |
|          | 3     | 0.00          | -26.81        | 0.00          | 9.20          | -26.03        | 0.00          | -136.73       | 0.00          | -61.17        |
|          | 4     | 0.00          | -21.62        | 0.00          | 9.85          | -28.48        | 0.00          | -140.21       | 0.00          | -71.73        |

### 3 HHe<sup>+</sup>

#### 3.1 6-311G(d,p)

##### 3.1.1 Plots

Figure S1: For HHe<sup>+</sup> molecule and 6-311G(d,p) basis set, variation of  $\alpha_{ZZ}$  (top) and  $\beta_{ZZZ}$  (bottom) with respect to the number of orbitals (FIOs decomposition presented in this work, in Plots S1a and S1c) or states (SOS approaches, in Plots S1b and S1d). For  $\alpha$  FIOs, three approaches were considered: CPKS (CAM-B3LYP), CPHF and UPHF. For  $\beta$  FIOs, the results of CPKS and CPHF approaches are provided. All elements of the  $\beta$  tensor were recomputed with an error less than 0.04 au in the case of the FIOs. For SOS approach, TDDFT (CAM-B3LYP) and CIS methods were employed. Recomputed values of  $\alpha_{ZZ}$  and  $\beta_{ZZZ}$  for the different approaches are included in each plot. HOMO (H) and LUMO (L) are represented by blue and pink dotted lines, respectively.

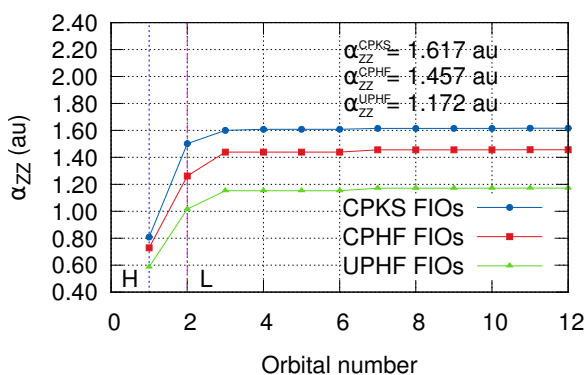

(a) CPKS-, CPHF- and UPHF-FIOs decomposition of  $\alpha_{ZZ}$  into MOs.

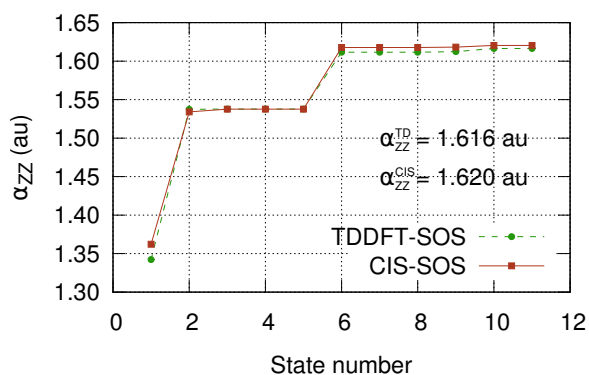

(b) TDDFT- and CIS-SOS decomposition of  $\alpha_{ZZ}$  into states.

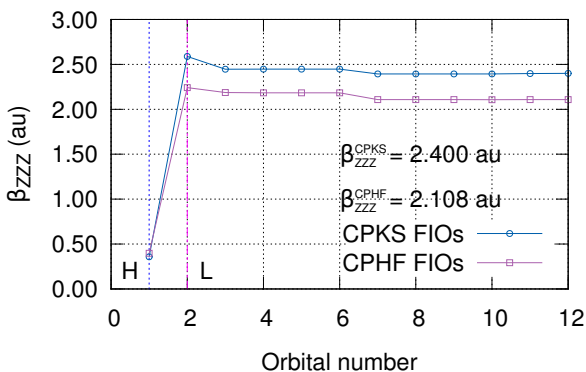

(c) CPKS- and CPHF-FIOs decomposition of  $\beta_{ZZZ}$  into MOs.

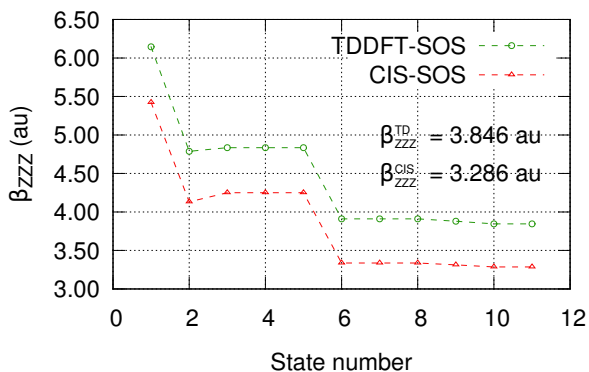

(d) TDDFT- and CIS-SOS decomposition of  $\beta_{ZZZ}$  into states.

### 3.1.2 Main contributions from different excited states at TDDFT (CAM-B3LYP) approach

| #_exc.st | ___symm___ | Exc.E   | Osc._Strength | ___f___ | _ <s**2>_</s**2> | min(4)= | 1 -> 3   | 0.00130  |   |              |
|----------|------------|---------|---------------|---------|------------------|---------|----------|----------|---|--------------|
|          |            |         |               |         |                  | min(5)= | 1 -> 7   | 0.00683  |   |              |
| 1        | Singlet-SG | 25.3777 | 48.86         | 0.3892  | 0.000            | #CIs=7  | #CIs>0=4 | #CIs<0=3 |   |              |
|          |            |         |               |         |                  | max(1)= | 1 -> 2   | 0.70588  |   |              |
|          |            |         |               |         |                  | max(2)= | 1 -> 7   | 0.01962  | 4 | Singlet-?Sym |
|          |            |         |               |         |                  | max(3)= | 1 -> 11  | -0.00521 |   | 49.6261      |
|          |            |         |               |         |                  | max(4)= | 1 -> 10  | -0.00607 |   | 24.98        |
|          |            |         |               |         |                  | max(5)= | 1 -> 12  | -0.00815 |   | 0.6477       |
|          |            |         |               |         |                  | min(1)= | 1 -> 4   | -0.05874 |   | 0.000        |
|          |            |         |               |         |                  | min(2)= | 1 -> 3   | -0.02041 |   |              |
|          |            |         |               |         |                  | min(3)= | 1 -> 12  | -0.00815 |   |              |
|          |            |         |               |         |                  | min(4)= | 1 -> 10  | -0.00607 |   |              |
|          |            |         |               |         |                  | min(5)= | 1 -> 11  | -0.00521 |   |              |
|          |            |         |               |         |                  | #CIs=7  | #CIs>0=2 | #CIs<0=5 |   |              |
|          |            |         |               |         |                  | max(1)= | 1 -> 5   | 0.68562  |   |              |
|          |            |         |               |         |                  | max(2)= | 1 -> 6   | 0.17112  |   |              |
|          |            |         |               |         |                  | max(3)= | 1 -> 8   | 0.03117  |   |              |
|          |            |         |               |         |                  | max(4)= | 1 -> 9   | 0.00778  |   |              |
|          |            |         |               |         |                  | max(5)= | 1 -> 4   | 0.70534  |   |              |
|          |            |         |               |         |                  | min(1)= | 1 -> 9   | 0.00778  |   |              |
|          |            |         |               |         |                  | min(2)= | 1 -> 8   | 0.03117  |   |              |
|          |            |         |               |         |                  | min(3)= | 1 -> 6   | 0.17112  |   |              |
|          |            |         |               |         |                  | min(4)= | 1 -> 5   | 0.68562  |   |              |
|          |            |         |               |         |                  | min(5)= | 1 -> 10  | -0.01534 |   |              |
| 2        | Singlet-SG | 32.8423 | 37.75         | 0.0947  | 0.000            | #CIs=4  | #CIs>0=4 | #CIs<0=0 |   |              |
|          |            |         |               |         |                  | max(1)= | 1 -> 3   | 0.70684  |   |              |
|          |            |         |               |         |                  | max(2)= | 1 -> 2   | 0.02014  | 5 | Singlet-?Sym |
|          |            |         |               |         |                  | max(3)= | 1 -> 10  | 0.00422  |   | 49.6261      |
|          |            |         |               |         |                  | max(4)= | 1 -> 12  | -0.00125 |   | 24.98        |
|          |            |         |               |         |                  | max(5)= | 1 -> 4   | -0.00287 |   | 0.6477       |
|          |            |         |               |         |                  | min(1)= | 1 -> 7   | -0.01227 |   | 0.000        |
|          |            |         |               |         |                  | min(2)= | 1 -> 11  | -0.00600 |   |              |
|          |            |         |               |         |                  | min(3)= | 1 -> 4   | -0.00287 |   |              |
|          |            |         |               |         |                  | min(4)= | 1 -> 12  | -0.00125 |   |              |
|          |            |         |               |         |                  | min(5)= | 1 -> 10  | 0.00422  |   |              |
|          |            |         |               |         |                  | #CIs=7  | #CIs>0=3 | #CIs<0=4 |   |              |
|          |            |         |               |         |                  | max(1)= | 1 -> 6   | 0.68562  |   |              |
|          |            |         |               |         |                  | max(2)= | 1 -> 9   | 0.03117  |   |              |
|          |            |         |               |         |                  | max(3)= | 1 -> 8   | -0.00778 |   |              |
|          |            |         |               |         |                  | max(4)= | 1 -> 5   | -0.17112 |   |              |
|          |            |         |               |         |                  | max(5)= | 1 -> 5   | 0.68562  |   |              |
|          |            |         |               |         |                  | min(1)= | 1 -> 5   | -0.17112 |   |              |
|          |            |         |               |         |                  | min(2)= | 1 -> 8   | -0.00778 |   |              |
|          |            |         |               |         |                  | min(3)= | 1 -> 9   | 0.03117  |   |              |
|          |            |         |               |         |                  | min(4)= | 1 -> 6   | 0.68562  |   |              |
|          |            |         |               |         |                  | min(5)= | 1 -> 9   | 0.00778  |   |              |
| 3        | Singlet-SG | 46.8246 | 26.48         | 0.0004  | 0.000            | #CIs=4  | #CIs>0=2 | #CIs<0=2 |   |              |
|          |            |         |               |         |                  | max(1)= | 1 -> 4   | 0.70534  |   |              |
|          |            |         |               |         |                  | max(2)= | 1 -> 2   | 0.06098  | 6 | Singlet-SG   |
|          |            |         |               |         |                  | max(3)= | 1 -> 7   | 0.00683  |   | 62.9858      |
|          |            |         |               |         |                  | max(4)= | 1 -> 3   | 0.00130  |   | 19.68        |
|          |            |         |               |         |                  | max(5)= | 1 -> 11  | -0.01096 |   | 0.1317       |
|          |            |         |               |         |                  | min(1)= | 1 -> 10  | -0.01534 |   | 0.000        |
|          |            |         |               |         |                  | min(2)= | 1 -> 12  | -0.01193 |   |              |
|          |            |         |               |         |                  | min(3)= | 1 -> 11  | -0.01096 |   |              |
|          |            |         |               |         |                  | max(1)= | 1 -> 7   | 0.70660  |   |              |
|          |            |         |               |         |                  | max(2)= | 1 -> 3   | 0.01341  |   |              |
|          |            |         |               |         |                  | max(3)= | 1 -> 11  | 0.00424  |   |              |
|          |            |         |               |         |                  | max(4)= | 1 -> 12  | 0.00210  |   |              |
|          |            |         |               |         |                  | max(5)= | 1 -> 4   | -0.00606 |   |              |
|          |            |         |               |         |                  | min(1)= | 1 -> 10  | -0.02235 |   |              |

|   |              |                          |         |          |       |            |          |                          |         |          |          |  |  |
|---|--------------|--------------------------|---------|----------|-------|------------|----------|--------------------------|---------|----------|----------|--|--|
|   |              | min(2)=                  | 1 -> 2  | -0.02114 |       |            |          | max(3)=                  | 1 -> 4  | 0.01452  |          |  |  |
|   |              | min(3)=                  | 1 -> 4  | -0.00606 |       |            |          | max(4)=                  | 1 -> 2  | 0.00667  |          |  |  |
|   |              | min(4)=                  | 1 -> 12 | 0.00210  |       |            |          | max(5)=                  | 1 -> 12 | -0.00146 |          |  |  |
|   |              | min(5)=                  | 1 -> 11 | 0.00424  |       |            |          | min(1)=                  | 1 -> 11 | -0.02345 |          |  |  |
|   |              | #CIs=7 #CIs>0=4 #CIs<0=3 |         |          |       |            |          |                          | min(2)= | 1 -> 3   | -0.00411 |  |  |
| 7 | Singlet-?Sym | 67.8741                  | 18.27   | 0.0646   | 0.000 |            |          | min(3)=                  | 1 -> 12 | -0.00146 |          |  |  |
|   |              | max(1)=                  | 1 -> 8  | 0.70122  |       |            |          | min(4)=                  | 1 -> 2  | 0.00667  |          |  |  |
|   |              | max(2)=                  | 1 -> 6  | 0.00392  |       |            |          | min(5)=                  | 1 -> 4  | 0.01452  |          |  |  |
|   |              | max(3)=                  | 1 -> 5  | -0.03213 |       |            |          | #CIs=7 #CIs>0=4 #CIs<0=3 |         |          |          |  |  |
|   |              | max(4)=                  | 1 -> 9  | -0.08553 | 10    | Singlet-SG | 96.1022  | 12.90                    | 0.0172  | 0.000    |          |  |  |
|   |              | max(5)=                  | 1 -> 7  | 0.70660  |       |            |          | max(1)=                  | 1 -> 11 | 0.70657  |          |  |  |
|   |              | min(1)=                  | 1 -> 9  | -0.08553 |       |            |          | max(2)=                  | 1 -> 10 | 0.02337  |          |  |  |
|   |              | min(2)=                  | 1 -> 5  | -0.03213 |       |            |          | max(3)=                  | 1 -> 4  | 0.01134  |          |  |  |
|   |              | min(3)=                  | 1 -> 6  | 0.00392  |       |            |          | max(4)=                  | 1 -> 2  | 0.00711  |          |  |  |
|   |              | min(4)=                  | 1 -> 8  | 0.70122  |       |            |          | max(5)=                  | 1 -> 3  | 0.00569  |          |  |  |
|   |              | min(5)=                  | 1 -> 10 | -0.02235 |       |            |          | min(1)=                  | 1 -> 12 | -0.01013 |          |  |  |
|   |              | #CIs=4 #CIs>0=2 #CIs<0=2 |         |          |       |            |          |                          | min(2)= | 1 -> 7   | -0.00336 |  |  |
|   |              |                          |         |          |       |            |          | min(3)=                  | 1 -> 3  | 0.00569  |          |  |  |
| 8 | Singlet-?Sym | 67.8741                  | 18.27   | 0.0646   | 0.000 |            |          | min(4)=                  | 1 -> 2  | 0.00711  |          |  |  |
|   |              | max(1)=                  | 1 -> 9  | 0.70122  |       |            |          | min(5)=                  | 1 -> 4  | 0.01134  |          |  |  |
|   |              | max(2)=                  | 1 -> 8  | 0.08553  |       |            |          | #CIs=7 #CIs>0=5 #CIs<0=2 |         |          |          |  |  |
|   |              | max(3)=                  | 1 -> 5  | -0.00392 |       |            |          |                          |         |          |          |  |  |
|   |              | max(4)=                  | 1 -> 6  | -0.03213 | 11    | Singlet-SG | 190.6269 | 6.50                     | 0.0000  | 0.000    |          |  |  |
|   |              | max(5)=                  | 1 -> 8  | 0.70122  |       |            |          | max(1)=                  | 1 -> 12 | 0.70701  |          |  |  |
|   |              | min(1)=                  | 1 -> 6  | -0.03213 |       |            |          | max(2)=                  | 1 -> 4  | 0.01214  |          |  |  |
|   |              | min(2)=                  | 1 -> 5  | -0.00392 |       |            |          | max(3)=                  | 1 -> 2  | 0.01028  |          |  |  |
|   |              | min(3)=                  | 1 -> 8  | 0.08553  |       |            |          | max(4)=                  | 1 -> 11 | 0.00999  |          |  |  |
|   |              | min(4)=                  | 1 -> 9  | 0.70122  |       |            |          | max(5)=                  | 1 -> 10 | 0.00163  |          |  |  |
|   |              | min(5)=                  | 1 -> 9  | -0.08553 |       |            |          | min(1)=                  | 1 -> 7  | -0.00194 |          |  |  |
|   |              | #CIs=4 #CIs>0=2 #CIs<0=2 |         |          |       |            |          |                          | min(2)= | 1 -> 3   | 0.00107  |  |  |
|   |              |                          |         |          |       |            |          | min(3)=                  | 1 -> 10 | 0.00163  |          |  |  |
| 9 | Singlet-SG   | 77.1426                  | 16.07   | 0.0019   | 0.000 |            |          | min(4)=                  | 1 -> 11 | 0.00999  |          |  |  |
|   |              | max(1)=                  | 1 -> 10 | 0.70618  |       |            |          | min(5)=                  | 1 -> 2  | 0.01028  |          |  |  |
|   |              | max(2)=                  | 1 -> 7  | 0.02284  |       |            |          | #CIs=7 #CIs>0=6 #CIs<0=1 |         |          |          |  |  |

### 3.1.3 Main contributions from different excited states at CIS approach

|          |            |       |               |         |         |            |         |        |         |       |
|----------|------------|-------|---------------|---------|---------|------------|---------|--------|---------|-------|
| #_exc.st | ___symm___ | Exc.E | Osc._Strength | ___f___ | <S**2>_ | Singlet-SG | 27.3850 | 45.27  | 0.4599  | 0.000 |
|          |            |       |               |         |         |            | max(1)= | 1 -> 2 | 0.69064 |       |



|   |              |                          |         |          |       |  |            |                          |         |          |       |  |
|---|--------------|--------------------------|---------|----------|-------|--|------------|--------------------------|---------|----------|-------|--|
|   |              | min(1)=                  | 1 -> 8  | -0.45891 |       |  |            | min(4)=                  | 1 -> 12 | 0.00432  |       |  |
|   |              | min(2)=                  | 1 -> 6  | -0.01415 |       |  |            | min(5)=                  | 1 -> 3  | 0.01496  |       |  |
|   |              | min(3)=                  | 1 -> 5  | 0.01657  |       |  |            | #CIs=7 #CIs>0=6 #CIs<0=1 |         |          |       |  |
|   |              | min(4)=                  | 1 -> 9  | 0.53751  |       |  |            |                          |         |          |       |  |
|   |              | min(5)=                  | 1 -> 10 | -0.04254 | 10    |  | Singlet-SG | 100.0171                 | 12.40   | 0.0099   | 0.000 |  |
|   |              | #CIs=4 #CIs>0=2 #CIs<0=2 |         |          |       |  |            | max(1)=                  | 1 -> 11 | 0.70591  |       |  |
| 8 | Singlet-?Sym | 69.9228                  | 17.73   | 0.0531   | 0.000 |  |            | max(2)=                  | 1 -> 10 | 0.03320  |       |  |
|   |              | max(1)=                  | 1 -> 8  | 0.53751  |       |  |            | max(3)=                  | 1 -> 2  | 0.00245  |       |  |
|   |              | max(2)=                  | 1 -> 9  | 0.45891  |       |  |            | max(4)=                  | 1 -> 12 | 0.00040  |       |  |
|   |              | max(3)=                  | 1 -> 6  | 0.01657  |       |  |            | max(5)=                  | 1 -> 3  | -0.00734 |       |  |
|   |              | max(4)=                  | 1 -> 5  | 0.01415  |       |  |            | min(1)=                  | 1 -> 7  | -0.02067 |       |  |
|   |              | max(5)=                  | 1 -> 9  | 0.53751  |       |  |            | min(2)=                  | 1 -> 4  | -0.00982 |       |  |
|   |              | min(1)=                  | 1 -> 5  | 0.01415  |       |  |            | min(3)=                  | 1 -> 3  | -0.00734 |       |  |
|   |              | min(2)=                  | 1 -> 6  | 0.01657  |       |  |            | min(4)=                  | 1 -> 12 | 0.00040  |       |  |
|   |              | min(3)=                  | 1 -> 9  | 0.45891  |       |  |            | min(5)=                  | 1 -> 2  | 0.00245  |       |  |
|   |              | min(4)=                  | 1 -> 8  | 0.53751  |       |  |            | #CIs=7 #CIs>0=4 #CIs<0=3 |         |          |       |  |
|   |              | min(5)=                  | 1 -> 8  | -0.45891 | 11    |  | Singlet-SG | 195.2285                 | 6.35    | 0.0002   | 0.000 |  |
|   |              | #CIs=4 #CIs>0=4 #CIs<0=0 |         |          |       |  |            | max(1)=                  | 1 -> 12 | 0.70707  |       |  |
| 9 | Singlet-SG   | 79.7245                  | 15.55   | 0.0013   | 0.000 |  |            | max(2)=                  | 1 -> 2  | 0.00538  |       |  |
|   |              | max(1)=                  | 1 -> 10 | 0.70491  |       |  |            | max(3)=                  | 1 -> 7  | 0.00150  |       |  |
|   |              | max(2)=                  | 1 -> 7  | 0.04303  |       |  |            | max(4)=                  | 1 -> 3  | 0.00038  |       |  |
|   |              | max(3)=                  | 1 -> 3  | 0.01496  |       |  |            | max(5)=                  | 1 -> 4  | 0.00024  |       |  |
|   |              | max(4)=                  | 1 -> 12 | 0.00432  |       |  |            | min(1)=                  | 1 -> 10 | -0.00445 |       |  |
|   |              | max(5)=                  | 1 -> 4  | 0.00278  |       |  |            | min(2)=                  | 1 -> 11 | -0.00016 |       |  |
|   |              | min(1)=                  | 1 -> 11 | -0.03170 |       |  |            | min(3)=                  | 1 -> 4  | 0.00024  |       |  |
|   |              | min(2)=                  | 1 -> 2  | 0.00147  |       |  |            | min(4)=                  | 1 -> 3  | 0.00038  |       |  |
|   |              | min(3)=                  | 1 -> 4  | 0.00278  |       |  |            | min(5)=                  | 1 -> 7  | 0.00150  |       |  |
|   |              |                          |         |          |       |  |            | #CIs=7 #CIs>0=5 #CIs<0=2 |         |          |       |  |

## 3.2 6-311G++(d,p)

### 3.2.1 Plots

Figure S2: For  $\text{HHe}^+$  molecule and 6-311++G(d,p) basis set, variation of  $\alpha_{ZZ}$  (top) and  $\beta_{ZZZ}$  (bottom) with respect to the number of orbitals (FIOs decomposition presented in this work, in Plots S2a and S2c) or states (SOS approaches, in Plots S2b and S2d). For  $\alpha$  FIOs, three approaches were considered: CPKS (CAM-B3LYP), CPHF and UPHF. For  $\beta$  FIOs, the results of CPKS and CPHF approaches are provided. All elements of the  $\beta$  tensor were recomputed with an error less than 0.01 au in the case of the FIOs. For SOS approach, TDDFT (CAM-B3LYP) and CIS methods were employed. Recomputed values of  $\alpha_{ZZ}$  and  $\beta_{ZZZ}$  for the different approaches are included in each plot. HOMO (H) and LUMO (L) are represented by blue and pink dotted lines, respectively.

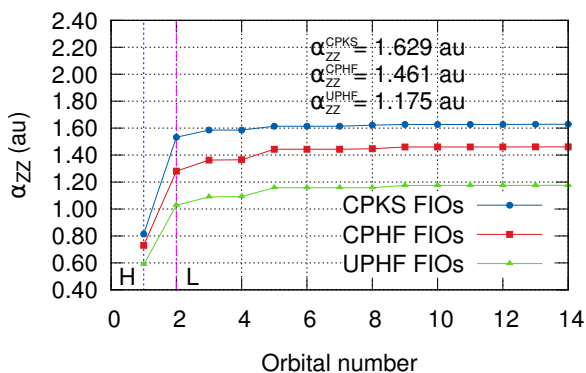

(a) CPKS-, CPHF- and UPHF-FIOs decomposition of  $\alpha_{ZZ}$  into MOs.

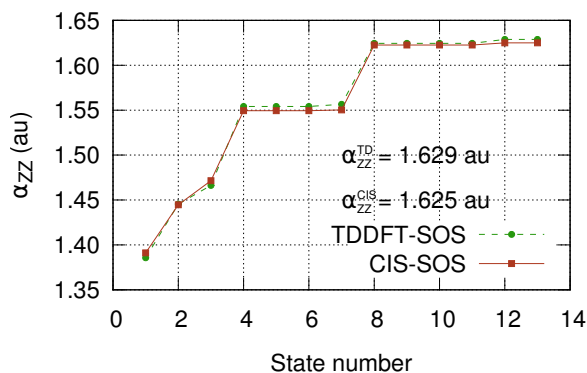

(b) TDDFT- and CIS-SOS decomposition of  $\alpha_{ZZ}$  into states.

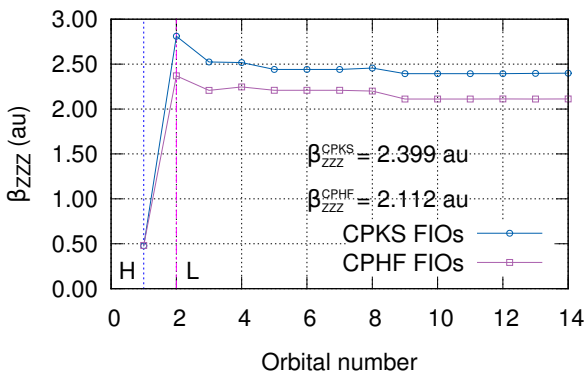

(c) CPKS- and CPHF-FIOs decomposition of  $\beta_{ZZZ}$  into MOs.

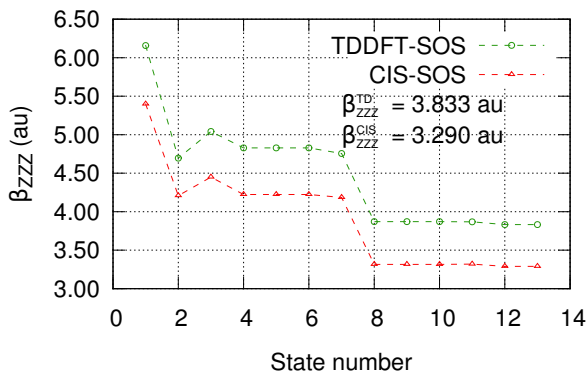

(d) TDDFT- and CIS-SOS decomposition of  $\beta_{ZZZ}$  into states.

### 3.2.2 Main contributions from different excited states at TDDFT (CAM-B3LYP) approach



| #_exc.st | __symm__   | Exc.E                    | Osc._Strength | __f__    | _ <del>S</del> *2>_ | Singlet-SG   | 38.2925 | 32.38 | 0.0580   | 0.000 |
|----------|------------|--------------------------|---------------|----------|---------------------|--------------|---------|-------|----------|-------|
| 1        | Singlet-SG | 25.1296                  | 49.34         | 0.3939   | 0.000               |              |         |       |          |       |
|          |            | max(1)=                  | 1 -> 2        | 0.70332  |                     | max(1)=      | 1 -> 5  |       | 0.70329  |       |
|          |            | max(2)=                  | 1 -> 9        | 0.02163  |                     | max(2)=      | 1 -> 4  |       | 0.05189  |       |
|          |            | max(3)=                  | 1 -> 5        | 0.01447  |                     | max(3)=      | 1 -> 8  |       | 0.01362  |       |
|          |            | max(4)=                  | 1 -> 12       | -0.00201 |                     | max(4)=      | 1 -> 12 |       | 0.00803  |       |
|          |            | max(5)=                  | 1 -> 13       | -0.00342 |                     | max(5)=      | 1 -> 14 |       | 0.00137  |       |
|          |            | min(1)=                  | 1 -> 4        | -0.05371 |                     | min(1)=      | 1 -> 3  |       | -0.04807 |       |
|          |            | min(2)=                  | 1 -> 3        | -0.05257 |                     | min(2)=      | 1 -> 2  |       | -0.01391 |       |
|          |            | min(3)=                  | 1 -> 8        | -0.03704 |                     | min(3)=      | 1 -> 9  |       | -0.01248 |       |
|          |            | min(4)=                  | 1 -> 14       | -0.00709 |                     | min(4)=      | 1 -> 13 |       | -0.00457 |       |
|          |            | min(5)=                  | 1 -> 13       | -0.00342 |                     | min(5)=      | 1 -> 14 |       | 0.00137  |       |
|          |            | #CIs=9 #CIs>0=3 #CIs<0=6 |               |          | 5                   | Singlet-?Sym | 49.6273 | 24.98 | 0.6480   | 0.000 |
|          |            |                          |               |          |                     | max(1)=      | 1 -> 6  |       | 0.58275  |       |
| 2        | Singlet-SG | 30.6326                  | 40.47         | 0.0252   | 0.000               |              |         |       |          |       |
|          |            | max(1)=                  | 1 -> 3        | 0.70046  |                     | max(1)=      | 1 -> 11 |       | 0.02657  |       |
|          |            | max(2)=                  | 1 -> 4        | 0.06388  |                     | max(2)=      | 1 -> 10 |       | -0.01822 |       |
|          |            | max(3)=                  | 1 -> 2        | 0.05598  |                     | max(3)=      | 1 -> 7  |       | -0.39970 |       |
|          |            | max(4)=                  | 1 -> 5        | 0.04451  |                     | max(4)=      | 1 -> 5  |       | 0.70329  |       |
|          |            | max(5)=                  | 1 -> 12       | -0.00111 |                     | max(5)=      | 1 -> 7  |       | -0.39970 |       |
|          |            | min(1)=                  | 1 -> 8        | -0.01699 |                     | min(1)=      | 1 -> 10 |       | -0.01822 |       |
|          |            | min(2)=                  | 1 -> 9        | -0.00620 |                     | min(2)=      | 1 -> 11 |       | 0.02657  |       |
|          |            | min(3)=                  | 1 -> 13       | -0.00407 |                     | min(3)=      | 1 -> 6  |       | 0.58275  |       |
|          |            | min(4)=                  | 1 -> 14       | -0.00290 |                     | min(4)=      | 1 -> 3  |       | -0.04807 |       |
|          |            | min(5)=                  | 1 -> 12       | -0.00111 |                     | min(5)=      |         |       |          |       |
|          |            | #CIs=9 #CIs>0=4 #CIs<0=5 |               |          | 6                   | Singlet-?Sym | 49.6273 | 24.98 | 0.6480   | 0.000 |
|          |            |                          |               |          |                     | max(1)=      | 1 -> 7  |       | 0.58275  |       |
|          |            |                          |               |          |                     | max(2)=      | 1 -> 6  |       | 0.39970  |       |
|          |            |                          |               |          |                     | max(3)=      | 1 -> 10 |       | 0.02657  |       |
|          |            |                          |               |          |                     | max(4)=      | 1 -> 11 |       | 0.01822  |       |
|          |            |                          |               |          |                     | max(5)=      | 1 -> 6  |       | 0.58275  |       |
|          |            |                          |               |          |                     | min(1)=      | 1 -> 11 |       | 0.01822  |       |
|          |            |                          |               |          |                     | min(2)=      | 1 -> 10 |       | 0.02657  |       |
|          |            |                          |               |          |                     | min(3)=      | 1 -> 6  |       | 0.39970  |       |
|          |            |                          |               |          |                     | min(4)=      | 1 -> 7  |       | 0.58275  |       |
|          |            |                          |               |          |                     | min(5)=      | 1 -> 7  |       | -0.39970 |       |
|          |            | #CIs=4 #CIs>0=4 #CIs<0=0 |               |          |                     |              |         |       |          |       |
| 3        | Singlet-SG | 34.7510                  | 35.68         | 0.0113   | 0.000               |              |         |       |          |       |
|          |            | max(1)=                  | 1 -> 4        | 0.70028  |                     | max(1)=      | 1 -> 8  |       | 0.70582  |       |
|          |            | max(2)=                  | 1 -> 2        | 0.05004  |                     |              |         |       |          |       |
|          |            | max(3)=                  | 1 -> 9        | 0.00912  |                     |              |         |       |          |       |
|          |            | max(4)=                  | 1 -> 12       | -0.00367 |                     |              |         |       |          |       |
|          |            | max(5)=                  | 1 -> 13       | -0.00392 |                     |              |         |       |          |       |
|          |            | min(1)=                  | 1 -> 3        | -0.06453 |                     |              |         |       |          |       |
|          |            | min(2)=                  | 1 -> 5        | -0.05487 |                     |              |         |       |          |       |
|          |            | min(3)=                  | 1 -> 8        | -0.02113 |                     |              |         |       |          |       |
|          |            | min(4)=                  | 1 -> 14       | -0.00632 |                     |              |         |       |          |       |
|          |            | min(5)=                  | 1 -> 13       | -0.00392 |                     |              |         |       |          |       |
|          |            | #CIs=9 #CIs>0=3 #CIs<0=6 |               |          | 7                   | Singlet-SG   | 54.0800 | 22.93 | 0.0032   | 0.000 |
|          |            |                          |               |          |                     | max(1)=      | 1 -> 8  |       | 0.70582  |       |

|    |              |         |       |        |       |                          |         |          |    |            |                          |         |          |       |
|----|--------------|---------|-------|--------|-------|--------------------------|---------|----------|----|------------|--------------------------|---------|----------|-------|
|    |              |         |       |        |       | max(2)=                  | 1 -> 2  | 0.04125  |    |            | max(4)=                  | 1 -> 10 | -0.11508 |       |
|    |              |         |       |        |       | max(3)=                  | 1 -> 4  | 0.01935  |    |            | max(5)=                  | 1 -> 10 | 0.69698  |       |
|    |              |         |       |        |       | max(4)=                  | 1 -> 9  | 0.01682  |    |            | min(1)=                  | 1 -> 10 | -0.11508 |       |
|    |              |         |       |        |       | max(5)=                  | 1 -> 3  | 0.01352  |    |            | min(2)=                  | 1 -> 6  | -0.03202 |       |
|    |              |         |       |        |       | min(1)=                  | 1 -> 5  | -0.01333 |    |            | min(3)=                  | 1 -> 7  | 0.00529  |       |
|    |              |         |       |        |       | min(2)=                  | 1 -> 14 | -0.01019 |    |            | min(4)=                  | 1 -> 11 | 0.69698  |       |
|    |              |         |       |        |       | min(3)=                  | 1 -> 13 | -0.00972 |    |            | min(5)=                  | 1 -> 7  | -0.03202 |       |
|    |              |         |       |        |       | min(4)=                  | 1 -> 12 | -0.00861 |    |            | #CIs=4 #CIs>0=2 #CIs<0=2 |         |          |       |
|    |              |         |       |        |       | min(5)=                  | 1 -> 3  | 0.01352  |    |            |                          |         |          |       |
|    |              |         |       |        |       | #CIs=9 #CIs>0=5 #CIs<0=4 |         |          | 11 | Singlet-SG | 81.6646                  | 15.18   | 0.0000   | 0.000 |
| 8  | Singlet-SG   | 64.0602 | 19.35 | 0.1254 | 0.000 |                          |         |          |    |            | max(1)=                  | 1 -> 12 | 0.70620  |       |
|    |              |         |       |        |       | max(2)=                  | 1 -> 9  | 0.70608  |    |            | max(3)=                  | 1 -> 8  | 0.00742  |       |
|    |              |         |       |        |       | max(3)=                  | 1 -> 5  | 0.01421  |    |            | max(4)=                  | 1 -> 4  | 0.00289  |       |
|    |              |         |       |        |       | max(4)=                  | 1 -> 3  | 0.00753  |    |            | max(5)=                  | 1 -> 2  | 0.00201  |       |
|    |              |         |       |        |       | max(5)=                  | 1 -> 14 | 0.00678  |    |            | min(1)=                  | 1 -> 13 | -0.01945 |       |
|    |              |         |       |        |       | min(1)=                  | 1 -> 13 | 0.00678  |    |            | min(2)=                  | 1 -> 5  | -0.00788 |       |
|    |              |         |       |        |       | min(2)=                  | 1 -> 14 | 0.00307  |    |            | min(3)=                  | 1 -> 14 | -0.00016 |       |
|    |              |         |       |        |       | min(3)=                  | 1 -> 12 | -0.02742 |    |            | min(4)=                  | 1 -> 3  | 0.00158  |       |
|    |              |         |       |        |       | min(4)=                  | 1 -> 2  | -0.02419 |    |            | min(5)=                  | 1 -> 2  | 0.00201  |       |
|    |              |         |       |        |       | min(5)=                  | 1 -> 8  | -0.01586 |    |            | #CIs=9 #CIs>0=6 #CIs<0=3 |         |          |       |
|    |              |         |       |        |       | min(4)=                  | 1 -> 4  | -0.00683 |    |            |                          |         |          |       |
|    |              |         |       |        |       | min(5)=                  | 1 -> 14 | 0.00307  |    |            |                          |         |          |       |
|    |              |         |       |        |       | #CIs=9 #CIs>0=5 #CIs<0=4 |         |          | 12 | Singlet-SG | 97.3985                  | 12.73   | 0.0185   | 0.000 |
| 9  | Singlet-?Sym | 67.8710 | 18.27 | 0.0651 | 0.000 |                          |         |          |    |            | max(1)=                  | 1 -> 13 | 0.70669  |       |
|    |              |         |       |        |       | max(2)=                  | 1 -> 10 | 0.69698  |    |            | max(2)=                  | 1 -> 12 | 0.01962  |       |
|    |              |         |       |        |       | max(3)=                  | 1 -> 11 | 0.11508  |    |            | max(3)=                  | 1 -> 8  | 0.00999  |       |
|    |              |         |       |        |       | max(4)=                  | 1 -> 6  | -0.00529 |    |            | max(4)=                  | 1 -> 2  | 0.00511  |       |
|    |              |         |       |        |       | max(5)=                  | 1 -> 7  | -0.03202 |    |            | max(5)=                  | 1 -> 4  | 0.00491  |       |
|    |              |         |       |        |       | min(1)=                  | 1 -> 9  | 0.70608  |    |            | min(1)=                  | 1 -> 14 | -0.00857 |       |
|    |              |         |       |        |       | min(2)=                  | 1 -> 7  | -0.03202 |    |            | min(2)=                  | 1 -> 9  | -0.00577 |       |
|    |              |         |       |        |       | min(3)=                  | 1 -> 6  | -0.00529 |    |            | min(3)=                  | 1 -> 3  | 0.00334  |       |
|    |              |         |       |        |       | min(4)=                  | 1 -> 11 | 0.11508  |    |            | min(4)=                  | 1 -> 5  | 0.00400  |       |
|    |              |         |       |        |       | min(5)=                  | 1 -> 10 | 0.69698  |    |            | min(5)=                  | 1 -> 4  | 0.00491  |       |
|    |              |         |       |        |       | min(5)=                  | 1 -> 12 | -0.02742 |    |            | #CIs=9 #CIs>0=7 #CIs<0=2 |         |          |       |
|    |              |         |       |        |       | #CIs=4 #CIs>0=2 #CIs<0=2 |         |          | 13 | Singlet-SG | 194.5931                 | 6.37    | 0.0000   | 0.000 |
| 10 | Singlet-?Sym | 67.8710 | 18.27 | 0.0651 | 0.000 |                          |         |          |    |            | max(1)=                  | 1 -> 14 | 0.70703  |       |
|    |              |         |       |        |       | max(2)=                  | 1 -> 11 | 0.69698  |    |            | max(2)=                  | 1 -> 8  | 0.01027  |       |
|    |              |         |       |        |       | max(3)=                  | 1 -> 7  | 0.00529  |    |            | max(3)=                  | 1 -> 2  | 0.00937  |       |
|    |              |         |       |        |       | max(4)=                  | 1 -> 6  | -0.03202 |    |            | max(4)=                  | 1 -> 13 | 0.00846  |       |
|    |              |         |       |        |       | max(5)=                  | 1 -> 6  | -0.03202 |    |            | max(5)=                  | 1 -> 4  | 0.00666  |       |

|         |         |          |                          |        |         |
|---------|---------|----------|--------------------------|--------|---------|
| min(1)= | 1 -> 9  | -0.00279 | min(4)=                  | 1 -> 3 | 0.00218 |
| min(2)= | 1 -> 5  | -0.00189 | min(5)=                  | 1 -> 4 | 0.00666 |
| min(3)= | 1 -> 12 | 0.00036  | #CIs=9 #CIs>0=7 #CIs<0=2 |        |         |

### 3.2.3 Main contributions from different excited states at CIS approach

| #_exc.st | ___symm___ | Exc.E   | Osc._Strength | ___f___ | _ <s**2>_</s**2> | min(1)=                  | 1 -> 3  | -0.18050 |
|----------|------------|---------|---------------|---------|------------------|--------------------------|---------|----------|
| 1        | Singlet-SG | 27.2151 | 45.56         | 0.4638  | 0.000            | min(2)=                  | 1 -> 5  | -0.16569 |
|          |            |         |               |         |                  | min(3)=                  | 1 -> 2  | -0.09407 |
|          |            |         |               |         |                  | min(4)=                  | 1 -> 9  | -0.00754 |
|          |            |         |               |         |                  | min(5)=                  | 1 -> 12 | -0.00595 |
|          |            |         |               |         |                  | #CIs=9 #CIs>0=3 #CIs<0=6 |         |          |
|          |            |         |               |         |                  | max(1)=                  | 1 -> 2  | 0.68603  |
|          |            |         |               |         |                  | max(2)=                  | 1 -> 4  | 0.03846  |
|          |            |         |               |         |                  | max(3)=                  | 1 -> 13 | -0.00033 |
|          |            |         |               |         |                  | max(4)=                  | 1 -> 12 | -0.00190 |
|          |            |         |               |         |                  | max(5)=                  | 1 -> 9  | -0.00389 |
|          |            |         |               | 4       | Singlet-SG       | 41.4654                  | 29.90   | 0.0604   |
|          |            |         |               |         |                  |                          |         | 0.000    |
|          |            |         |               |         |                  | min(1)=                  | 1 -> 3  | -0.14286 |
|          |            |         |               |         |                  | min(2)=                  | 1 -> 5  | -0.08511 |
|          |            |         |               |         |                  | min(3)=                  | 1 -> 8  | -0.01384 |
|          |            |         |               |         |                  | min(4)=                  | 1 -> 14 | -0.00462 |
|          |            |         |               |         |                  | min(5)=                  | 1 -> 9  | -0.00389 |
|          |            |         |               |         |                  | #CIs=9 #CIs>0=2 #CIs<0=7 |         |          |
| 2        | Singlet-SG | 33.4779 | 37.03         | 0.0270  | 0.000            | max(1)=                  | 1 -> 5  | 0.66948  |
|          |            |         |               |         |                  | max(2)=                  | 1 -> 4  | 0.12336  |
|          |            |         |               |         |                  | max(3)=                  | 1 -> 2  | 0.03956  |
|          |            |         |               |         |                  | max(4)=                  | 1 -> 8  | 0.03758  |
|          |            |         |               |         |                  | max(5)=                  | 1 -> 9  | 0.02596  |
|          |            |         |               |         |                  | min(1)=                  | 1 -> 3  | -0.18026 |
|          |            |         |               |         |                  | min(2)=                  | 1 -> 13 | -0.00917 |
|          |            |         |               |         |                  | min(3)=                  | 1 -> 14 | 0.00045  |
|          |            |         |               |         |                  | min(4)=                  | 1 -> 12 | 0.01865  |
|          |            |         |               |         |                  | min(5)=                  | 1 -> 9  | 0.02596  |
|          |            |         |               |         |                  | #CIs=9 #CIs>0=7 #CIs<0=2 |         |          |
|          |            |         |               |         |                  | max(1)=                  | 1 -> 8  | 0.03399  |
|          |            |         |               | 5       | Singlet-?Sym     | 50.2689                  | 24.66   | 0.7008   |
|          |            |         |               |         |                  |                          |         | 0.000    |
|          |            |         |               |         |                  | max(1)=                  | 1 -> 6  | 0.56957  |
|          |            |         |               |         |                  | max(2)=                  | 1 -> 10 | 0.01283  |
|          |            |         |               |         |                  | max(3)=                  | 1 -> 11 | -0.01746 |
|          |            |         |               |         |                  | max(4)=                  | 1 -> 7  | -0.41848 |
|          |            |         |               |         |                  | max(5)=                  | 1 -> 5  | 0.66948  |
|          |            |         |               |         |                  | min(1)=                  | 1 -> 7  | -0.41848 |
|          |            |         |               |         |                  | min(2)=                  | 1 -> 11 | -0.01746 |
| 3        | Singlet-SG | 38.1164 | 32.53         | 0.0175  | 0.000            | min(3)=                  | 1 -> 10 | 0.01283  |
|          |            |         |               |         |                  | min(4)=                  | 1 -> 6  | 0.56957  |
|          |            |         |               |         |                  | min(5)=                  | 1 -> 3  | -0.18026 |
|          |            |         |               |         |                  | #CIs=4 #CIs>0=2 #CIs<0=2 |         |          |
|          |            |         |               |         |                  | max(1)=                  | 1 -> 4  | 0.65507  |
|          |            |         |               |         |                  | max(2)=                  | 1 -> 8  | 0.04347  |
|          |            |         |               |         |                  | max(3)=                  | 1 -> 13 | 0.00254  |
|          |            |         |               |         |                  | max(4)=                  | 1 -> 14 | -0.00334 |
|          |            |         |               |         |                  | max(5)=                  | 1 -> 12 | -0.00595 |
|          |            |         |               | 6       | Singlet-?Sym     | 50.2689                  | 24.66   | 0.7008   |
|          |            |         |               |         |                  |                          |         | 0.000    |

|   |              |                          |         |          |       |              |          |                          |         |          |  |  |
|---|--------------|--------------------------|---------|----------|-------|--------------|----------|--------------------------|---------|----------|--|--|
|   |              | max(1)=                  | 1 -> 7  | 0.56957  |       |              |          | max(3)=                  | 1 -> 7  | 0.02081  |  |  |
|   |              | max(2)=                  | 1 -> 6  | 0.41848  |       |              |          | max(4)=                  | 1 -> 6  | 0.00603  |  |  |
|   |              | max(3)=                  | 1 -> 11 | -0.01283 |       |              |          | max(5)=                  | 1 -> 9  | 0.70507  |  |  |
|   |              | max(4)=                  | 1 -> 10 | -0.01746 |       |              |          | min(1)=                  | 1 -> 6  | 0.00603  |  |  |
|   |              | max(5)=                  | 1 -> 6  | 0.56957  |       |              |          | min(2)=                  | 1 -> 7  | 0.02081  |  |  |
|   |              | min(1)=                  | 1 -> 10 | -0.01746 |       |              |          | min(3)=                  | 1 -> 11 | 0.19673  |  |  |
|   |              | min(2)=                  | 1 -> 11 | -0.01283 |       |              |          | min(4)=                  | 1 -> 10 | 0.67884  |  |  |
|   |              | min(3)=                  | 1 -> 6  | 0.41848  |       |              |          | min(5)=                  | 1 -> 12 | -0.03697 |  |  |
|   |              | min(4)=                  | 1 -> 7  | 0.56957  |       |              |          | #CIs=4 #CIs>0=4 #CIs<0=0 |         |          |  |  |
|   |              | min(5)=                  | 1 -> 7  | -0.41848 |       |              |          |                          |         |          |  |  |
|   |              | #CIs=4 #CIs>0=2 #CIs<0=2 |         |          | 10    | Singlet-?Sym | 69.9154  | 17.73                    | 0.0538  | 0.000    |  |  |
|   |              |                          |         |          |       |              |          | max(1)=                  | 1 -> 11 | 0.67884  |  |  |
| 7 | Singlet-SG   | 55.4610                  | 22.36   | 0.0011   | 0.000 |              |          | max(2)=                  | 1 -> 6  | 0.02081  |  |  |
|   |              | max(1)=                  | 1 -> 8  | 0.70363  |       |              |          | max(3)=                  | 1 -> 7  | -0.00603 |  |  |
|   |              | max(2)=                  | 1 -> 13 | 0.01144  |       |              |          | max(4)=                  | 1 -> 10 | -0.19673 |  |  |
|   |              | max(3)=                  | 1 -> 2  | 0.01060  |       |              |          | max(5)=                  | 1 -> 10 | 0.67884  |  |  |
|   |              | max(4)=                  | 1 -> 9  | 0.00999  |       |              |          | min(1)=                  | 1 -> 10 | -0.19673 |  |  |
|   |              | max(5)=                  | 1 -> 14 | 0.00250  |       |              |          | min(2)=                  | 1 -> 7  | -0.00603 |  |  |
|   |              | min(1)=                  | 1 -> 4  | -0.05715 |       |              |          | min(3)=                  | 1 -> 6  | 0.02081  |  |  |
|   |              | min(2)=                  | 1 -> 5  | -0.03340 |       |              |          | min(4)=                  | 1 -> 11 | 0.67884  |  |  |
|   |              | min(3)=                  | 1 -> 3  | -0.01315 |       |              |          | min(5)=                  | 1 -> 6  | 0.00603  |  |  |
|   |              | min(4)=                  | 1 -> 12 | 0.00112  |       |              |          | #CIs=4 #CIs>0=2 #CIs<0=2 |         |          |  |  |
|   |              | min(5)=                  | 1 -> 14 | 0.00250  |       |              |          |                          |         |          |  |  |
|   |              | #CIs=9 #CIs>0=6 #CIs<0=3 |         |          | 11    | Singlet-SG   | 84.3348  | 14.70                    | 0.0001  | 0.000    |  |  |
|   |              |                          |         |          |       |              |          | max(1)=                  | 1 -> 12 | 0.70522  |  |  |
| 8 | Singlet-SG   | 65.8644                  | 18.82   | 0.1411   | 0.000 |              |          | max(2)=                  | 1 -> 9  | 0.03721  |  |  |
|   |              | max(1)=                  | 1 -> 9  | 0.70507  |       |              |          | max(3)=                  | 1 -> 14 | 0.00281  |  |  |
|   |              | max(2)=                  | 1 -> 13 | 0.02621  |       |              |          | max(4)=                  | 1 -> 4  | 0.00166  |  |  |
|   |              | max(3)=                  | 1 -> 4  | 0.00118  |       |              |          | max(5)=                  | 1 -> 3  | 0.00035  |  |  |
|   |              | max(4)=                  | 1 -> 2  | -0.00012 |       |              |          | min(1)=                  | 1 -> 13 | -0.02834 |  |  |
|   |              | max(5)=                  | 1 -> 3  | -0.00226 |       |              |          | min(2)=                  | 1 -> 5  | -0.02154 |  |  |
|   |              | min(1)=                  | 1 -> 12 | -0.03697 |       |              |          | min(3)=                  | 1 -> 8  | -0.00207 |  |  |
|   |              | min(2)=                  | 1 -> 5  | -0.02612 |       |              |          | min(4)=                  | 1 -> 2  | -0.00057 |  |  |
|   |              | min(3)=                  | 1 -> 8  | -0.01155 |       |              |          | min(5)=                  | 1 -> 3  | 0.00035  |  |  |
|   |              | min(4)=                  | 1 -> 14 | -0.00266 |       |              |          | #CIs=9 #CIs>0=5 #CIs<0=4 |         |          |  |  |
|   |              | min(5)=                  | 1 -> 3  | -0.00226 |       |              |          |                          |         |          |  |  |
|   |              | #CIs=9 #CIs>0=3 #CIs<0=6 |         |          | 12    | Singlet-SG   | 101.3328 | 12.24                    | 0.0110  | 0.000    |  |  |
|   |              |                          |         |          |       |              |          | max(1)=                  | 1 -> 13 | 0.70589  |  |  |
| 9 | Singlet-?Sym | 69.9154                  | 17.73   | 0.0538   | 0.000 |              |          | max(2)=                  | 1 -> 12 | 0.02994  |  |  |
|   |              | max(1)=                  | 1 -> 10 | 0.67884  |       |              |          | max(3)=                  | 1 -> 5  | 0.01038  |  |  |
|   |              | max(2)=                  | 1 -> 11 | 0.19673  |       |              |          | max(4)=                  | 1 -> 2  | 0.00152  |  |  |

|    |                          |          |          |        |       |  |  |                          |         |          |
|----|--------------------------|----------|----------|--------|-------|--|--|--------------------------|---------|----------|
|    | max(5)=                  | 1 -> 3   | 0.00111  |        |       |  |  | max(2)=                  | 1 -> 2  | 0.00439  |
|    | min(1)=                  | 1 -> 9   | -0.02446 |        |       |  |  | max(3)=                  | 1 -> 4  | 0.00416  |
|    | min(2)=                  | 1 -> 8   | -0.01060 |        |       |  |  | max(4)=                  | 1 -> 9  | 0.00241  |
|    | min(3)=                  | 1 -> 3   | 0.00111  |        |       |  |  | max(5)=                  | 1 -> 3  | 0.00033  |
|    | min(4)=                  | 1 -> 4   | 0.00111  |        |       |  |  | min(1)=                  | 1 -> 12 | -0.00299 |
|    | min(5)=                  | 1 -> 2   | 0.00152  |        |       |  |  | min(2)=                  | 1 -> 8  | -0.00233 |
|    | #CIs=8 #CIs>0=6 #CIs<0=2 |          |          |        |       |  |  | min(3)=                  | 1 -> 5  | -0.00129 |
| 13 | Singlet-SG               | 199.0088 | 6.23     | 0.0000 | 0.000 |  |  | min(4)=                  | 1 -> 13 | 0.00018  |
|    | max(1)=                  | 1 -> 14  | 0.70707  |        |       |  |  | min(5)=                  | 1 -> 3  | 0.00033  |
|    |                          |          |          |        |       |  |  | #CIs=9 #CIs>0=6 #CIs<0=3 |         |          |

## 4 N<sub>2</sub>

### 4.1 6-311G(d,p)

#### 4.1.1 Plots

Figure S3: For N<sub>2</sub> molecule and 6-311G(d,p) basis set, plots of variation of  $\alpha_{ZZ}$  with respect to the number of orbitals (FIO decomposition presented in this work, in Figure ZZZ) or states (SOS approach, in Figure S3a). For  $\alpha$  FIOs, three approaches were considered: CPKS, CPHF and UPHF. Recomputed values of  $\alpha_{ZZ}$  for the different approaches are included in each plot. HOMO (H) and LUMO (L) are represented by blue and pink dotted lines, respectively.

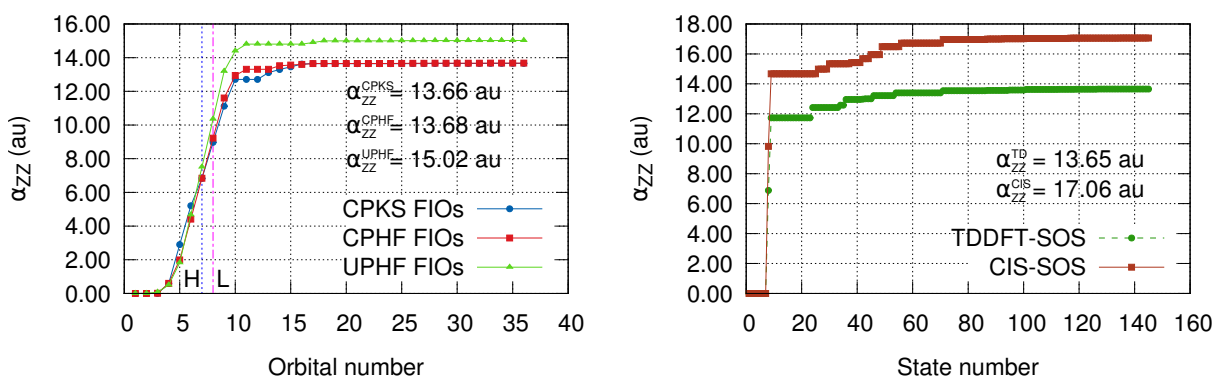

(a) CPKS-, CPHF- and UPHF-FIOs decomposition of  $\alpha_{ZZ}$  into MOs.

(b) TDDFT- and CIS-SOS decomposition of  $\alpha_{ZZ}$  into states.

## 4.2 6-311++G(d,p)

### 4.2.1 Plots

Figure S4: For  $N_2$  molecule and 6-311++G(d,p) basis set, plots of variation of  $\alpha_{ZZ}$  with respect to the number of orbitals (FIO decomposition presented in this work, in Figure ZZZ) or states (SOS approach, in Figure S4a). For  $\alpha$  FIOs, three approaches were considered: CPKS, CPHF and UPHF. Recomputed values of  $\alpha_{ZZ}$  for the different approaches are included in each plot. HOMO (H) and LUMO (L) are represented by blue and pink dotted lines, respectively.

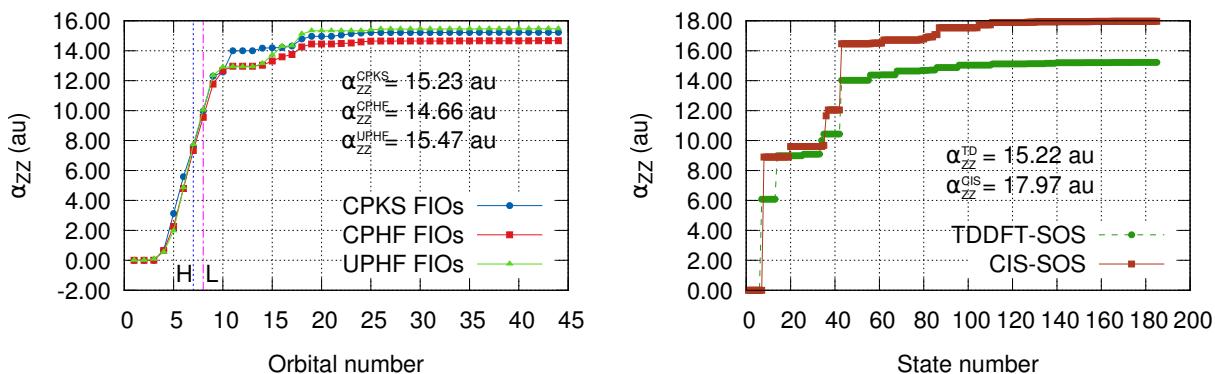

(a) CPKS-, CPHF- and UPHF-FIOs decomposition of  $\alpha_{ZZ}$  into MOs. (b) TDDFT- and CIS-SOS decomposition of  $\alpha_{ZZ}$  into states.

## 5 HF

### 5.1 6-311G(d,p)

#### 5.1.1 Plots

Figure S5: For HF molecule and 6-311G(d,p) basis set, variation of  $\alpha_{ZZ}$  (top) and  $\beta_{ZZZ}$  (bottom) with respect to the number of orbitals (FIOs decomposition presented in this work, in Plots S5a and S5c) or states (SOS approaches, in Plots S5b and S5d). For  $\alpha$  FIOs, three approaches were considered: CPKS (CAM-B3LYP), CPHF and UPHF. For  $\beta$  FIOs, the results of CPKS and CPHF approaches are provided. All elements of the  $\beta$  tensor were recomputed with an error less than 0.02 au in the case of the FIOs. For SOS approach, TDDFT (CAM-B3LYP) and CIS methods were employed. Recomputed values of  $\alpha_{ZZ}$  and  $\beta_{ZZZ}$  for the different approaches are included in each plot. HOMO (H) and LUMO (L) are represented by blue and pink dotted lines, respectively.

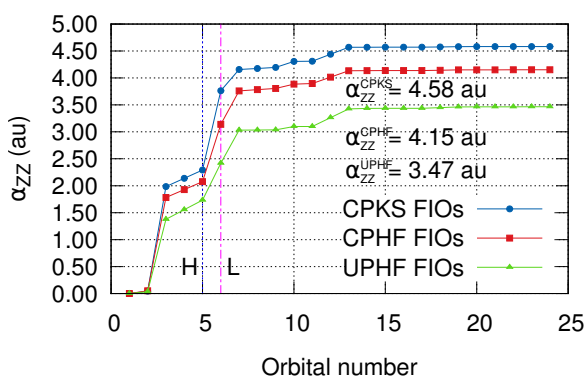

(a) CPKS-, CPHF- and UPHF-FIOs decomposition of  $\alpha_{ZZ}$  into MOs.

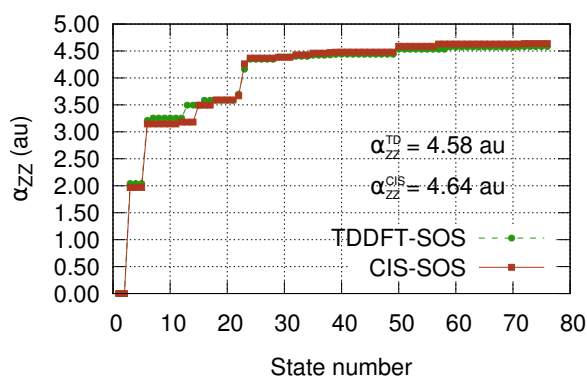

(b) TDDFT- and CIS-SOS decomposition of  $\alpha_{ZZ}$  into states.

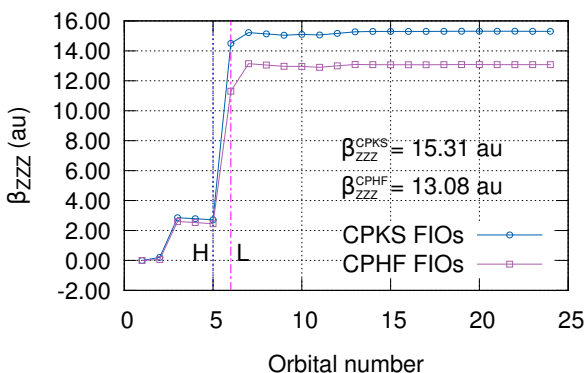

(c) CPKS- and CPHF-FIOs decomposition of  $\beta_{ZZZ}$  into MOs.

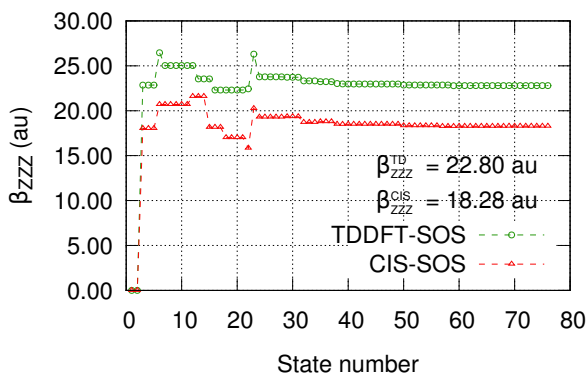

(d) TDDFT- and CIS-SOS decomposition of  $\beta_{ZZZ}$  into states.



## 5.1.2 Main contributions from different excited states at TDDFT (CAM-B3LYP) approach

| #_exc.st | ___symm___   | Exc.E     | Osc._Strength | ___f___ | _ <s**2>_</s**2> | min(4)=      | 2 -> 10   | -0.00114  |        |       |
|----------|--------------|-----------|---------------|---------|------------------|--------------|-----------|-----------|--------|-------|
|          |              |           |               |         |                  | min(5)=      | 3 -> 23   | -0.00071  |        |       |
| 1        | Singlet-?Sym | 9.7484    | 127.18        | 0.0196  | 0.000            | #CIs=24      | #CIs>0=16 | #CIs<0=8  |        |       |
|          | max(1)=      | 5 -> 6    | 0.70013       |         |                  |              |           |           |        |       |
|          | max(2)=      | 5 -> 7    | 0.05593       | 4       |                  | Singlet-?Sym | 19.1128   | 64.87     | 0.0380 | 0.000 |
|          | max(3)=      | 5 -> 11   | 0.00895       |         |                  | max(1)=      | 4 -> 7    | 0.65596   |        |       |
|          | max(4)=      | 4 -> 17   | 0.00353       |         |                  | max(2)=      | 5 -> 7    | 0.25691   |        |       |
|          | max(5)=      | 5 -> 16   | 0.00353       |         |                  | max(3)=      | 5 -> 17   | 0.00522   |        |       |
|          | min(1)=      | 4 -> 6    | -0.08111      |         |                  | max(4)=      | 2 -> 12   | 0.00518   |        |       |
|          | min(2)=      | 5 -> 10   | -0.01210      |         |                  | max(5)=      | 3 -> 18   | 0.00240   |        |       |
|          | min(3)=      | 4 -> 7    | -0.00648      |         |                  | min(1)=      | 4 -> 6    | -0.05264  |        |       |
|          | min(4)=      | 2 -> 9    | -0.00395      |         |                  | min(2)=      | 5 -> 6    | -0.02062  |        |       |
|          | min(5)=      | 2 -> 19   | -0.00188      |         |                  | min(3)=      | 4 -> 10   | -0.01632  |        |       |
|          | #CIs=36      | #CIs>0=19 | #CIs<0=17     |         |                  | min(4)=      | 4 -> 14   | -0.01092  |        |       |
|          |              |           |               |         |                  | min(5)=      | 3 -> 12   | -0.00821  |        |       |
| 2        | Singlet-?Sym | 9.7484    | 127.18        | 0.0196  | 0.000            | #CIs=37      | #CIs>0=17 | #CIs<0=20 |        |       |
|          | max(1)=      | 4 -> 6    | 0.70013       |         |                  |              |           |           |        |       |
|          | max(2)=      | 5 -> 6    | 0.08111       | 5       |                  | Singlet-?Sym | 19.1128   | 64.87     | 0.0380 | 0.000 |
|          | max(3)=      | 4 -> 7    | 0.05593       |         |                  | max(1)=      | 5 -> 7    | 0.65596   |        |       |
|          | max(4)=      | 4 -> 11   | 0.00895       |         |                  | max(2)=      | 4 -> 6    | 0.02062   |        |       |
|          | max(5)=      | 5 -> 7    | 0.00648       |         |                  | max(3)=      | 4 -> 10   | 0.00639   |        |       |
|          | min(1)=      | 4 -> 10   | -0.01210      |         |                  | max(4)=      | 4 -> 17   | 0.00522   |        |       |
|          | min(2)=      | 2 -> 8    | -0.00395      |         |                  | max(5)=      | 5 -> 16   | 0.00522   |        |       |
|          | min(3)=      | 4 -> 16   | -0.00353      |         |                  | min(1)=      | 4 -> 7    | -0.25691  |        |       |
|          | min(4)=      | 2 -> 18   | -0.00188      |         |                  | min(2)=      | 5 -> 6    | -0.05264  |        |       |
|          | min(5)=      | 4 -> 20   | -0.00186      |         |                  | min(3)=      | 5 -> 10   | -0.01632  |        |       |
|          | #CIs=36      | #CIs>0=17 | #CIs<0=19     |         |                  | min(4)=      | 5 -> 14   | -0.01092  |        |       |
|          |              |           |               |         |                  | min(5)=      | 3 -> 13   | -0.00821  |        |       |
| 3        | Singlet-SG   | 14.2483   | 87.02         | 0.1866  | 0.000            | #CIs=37      | #CIs>0=19 | #CIs<0=18 |        |       |
|          | max(1)=      | 3 -> 6    | 0.70537       |         |                  |              |           |           |        |       |
|          | max(2)=      | 4 -> 8    | 0.03354       | 6       |                  | Singlet-SG   | 24.8444   | 49.90     | 0.3252 | 0.000 |
|          | max(3)=      | 5 -> 9    | 0.03354       |         |                  | max(1)=      | 3 -> 7    | 0.69678   |        |       |
|          | max(4)=      | 3 -> 11   | 0.01300       |         |                  | max(2)=      | 4 -> 8    | 0.07887   |        |       |
|          | max(5)=      | 2 -> 11   | 0.01211       |         |                  | max(3)=      | 5 -> 9    | 0.07887   |        |       |
|          | min(1)=      | 3 -> 7    | -0.02865      |         |                  | max(4)=      | 4 -> 12   | 0.03505   |        |       |
|          | min(2)=      | 2 -> 14   | -0.00293      |         |                  | max(5)=      | 5 -> 13   | 0.03505   |        |       |
|          | min(3)=      | 2 -> 20   | -0.00183      |         |                  | min(1)=      | 2 -> 14   | -0.00837  |        |       |

|   |              |                             |         |          |       |    |                             |                           |          |          |       |  |  |
|---|--------------|-----------------------------|---------|----------|-------|----|-----------------------------|---------------------------|----------|----------|-------|--|--|
|   |              | min(2)=                     | 4 -> 18 | -0.00807 |       |    |                             | min(4)=                   | 5 -> 12  | -0.00011 |       |  |  |
|   |              | min(3)=                     | 5 -> 19 | -0.00807 |       |    |                             | min(5)=                   | 5 -> 9   | -0.00001 |       |  |  |
|   |              | min(4)=                     | 3 -> 20 | -0.00445 |       |    |                             | #CIs=12 #CIs>0=7 #CIs<0=5 |          |          |       |  |  |
|   |              | min(5)=                     | 3 -> 15 | -0.00239 |       |    |                             |                           |          |          |       |  |  |
|   |              | #CIs=25 #CIs>0=16 #CIs<0=9  |         |          |       | 10 | Singlet-?Sym                | 33.5752                   | 36.93    | 0.0000   | 0.000 |  |  |
|   |              |                             |         |          |       |    | max(1)=                     | 4 -> 8                    | 0.49999  |          |       |  |  |
| 7 | Singlet-SG   | 31.7579                     | 39.04   | 0.0200   | 0.000 |    | max(2)=                     | 4 -> 22                   | 0.00348  |          |       |  |  |
|   |              | max(1)=                     | 2 -> 6  | 0.69080  |       |    | max(3)=                     | 5 -> 19                   | 0.00012  |          |       |  |  |
|   |              | max(2)=                     | 2 -> 7  | 0.02635  |       |    | max(4)=                     | 5 -> 13                   | 0.00011  |          |       |  |  |
|   |              | max(3)=                     | 3 -> 11 | 0.02229  |       |    | max(5)=                     | 4 -> 9                    | -0.00001 |          |       |  |  |
|   |              | max(4)=                     | 4 -> 12 | 0.01501  |       |    | min(1)=                     | 5 -> 9                    | -0.49999 |          |       |  |  |
|   |              | max(5)=                     | 5 -> 13 | 0.01501  |       |    | min(2)=                     | 5 -> 21                   | -0.00348 |          |       |  |  |
|   |              | min(1)=                     | 4 -> 8  | -0.10235 |       |    | min(3)=                     | 2 -> 16                   | -0.00256 |          |       |  |  |
|   |              | min(2)=                     | 5 -> 9  | -0.10235 |       |    | min(4)=                     | 3 -> 16                   | -0.00126 |          |       |  |  |
|   |              | min(3)=                     | 3 -> 10 | -0.01609 |       |    | min(5)=                     | 4 -> 18                   | -0.00012 |          |       |  |  |
|   |              | min(4)=                     | 4 -> 18 | -0.00780 |       |    | #CIs=12 #CIs>0=4 #CIs<0=8   |                           |          |          |       |  |  |
|   |              | min(5)=                     | 5 -> 19 | -0.00780 |       |    |                             |                           |          |          |       |  |  |
|   |              | #CIs=25 #CIs>0=13 #CIs<0=12 |         |          |       | 11 | Singlet-?Sym                | 34.6083                   | 35.82    | 0.0004   | 0.000 |  |  |
|   |              |                             |         |          |       |    | max(1)=                     | 5 -> 10                   | 0.70260  |          |       |  |  |
| 8 | Singlet-?Sym | 33.2149                     | 37.33   | 0.0000   | 0.000 |    | max(2)=                     | 5 -> 7                    | 0.01815  |          |       |  |  |
|   |              | max(1)=                     | 5 -> 8  | 0.50001  |       |    | max(3)=                     | 5 -> 6                    | 0.01069  |          |       |  |  |
|   |              | max(2)=                     | 5 -> 22 | 0.00357  |       |    | max(4)=                     | 5 -> 14                   | 0.00742  |          |       |  |  |
|   |              | max(3)=                     | 4 -> 19 | 0.00026  |       |    | max(5)=                     | 4 -> 17                   | 0.00561  |          |       |  |  |
|   |              | max(4)=                     | 5 -> 12 | 0.00022  |       |    | min(1)=                     | 3 -> 9                    | -0.05751 |          |       |  |  |
|   |              | max(5)=                     | 4 -> 13 | -0.00022 |       |    | min(2)=                     | 4 -> 10                   | -0.04755 |          |       |  |  |
|   |              | min(1)=                     | 4 -> 9  | -0.50001 |       |    | min(3)=                     | 3 -> 13                   | -0.01150 |          |       |  |  |
|   |              | min(2)=                     | 4 -> 21 | -0.00357 |       |    | min(4)=                     | 2 -> 9                    | -0.00870 |          |       |  |  |
|   |              | min(3)=                     | 5 -> 18 | -0.00026 |       |    | min(5)=                     | 5 -> 15                   | -0.00464 |          |       |  |  |
|   |              | min(4)=                     | 4 -> 13 | -0.00022 |       |    | #CIs=36 #CIs>0=18 #CIs<0=18 |                           |          |          |       |  |  |
|   |              | min(5)=                     | 5 -> 12 | 0.00022  |       |    |                             |                           |          |          |       |  |  |
|   |              | #CIs=8 #CIs>0=4 #CIs<0=4    |         |          |       | 12 | Singlet-?Sym                | 34.6083                   | 35.82    | 0.0004   | 0.000 |  |  |
|   |              |                             |         |          |       |    | max(1)=                     | 4 -> 10                   | 0.70260  |          |       |  |  |
| 9 | Singlet-?Sym | 33.5752                     | 36.93   | 0.0000   | 0.000 |    | max(2)=                     | 5 -> 10                   | 0.04755  |          |       |  |  |
|   |              | max(1)=                     | 4 -> 9  | 0.49999  |       |    | max(3)=                     | 4 -> 7                    | 0.01815  |          |       |  |  |
|   |              | max(2)=                     | 5 -> 8  | 0.49999  |       |    | max(4)=                     | 4 -> 6                    | 0.01069  |          |       |  |  |
|   |              | max(3)=                     | 4 -> 21 | 0.00348  |       |    | max(5)=                     | 4 -> 14                   | 0.00742  |          |       |  |  |
|   |              | max(4)=                     | 5 -> 22 | 0.00348  |       |    | min(1)=                     | 3 -> 8                    | -0.05751 |          |       |  |  |
|   |              | max(5)=                     | 2 -> 17 | 0.00256  |       |    | min(2)=                     | 3 -> 12                   | -0.01150 |          |       |  |  |
|   |              | min(1)=                     | 4 -> 19 | -0.00012 |       |    | min(3)=                     | 2 -> 8                    | -0.00870 |          |       |  |  |
|   |              | min(2)=                     | 5 -> 18 | -0.00012 |       |    | min(4)=                     | 4 -> 16                   | -0.00561 |          |       |  |  |
|   |              | min(3)=                     | 4 -> 13 | -0.00011 |       |    | min(5)=                     | 4 -> 15                   | -0.00464 |          |       |  |  |

|    |              |                             |         |          |              |                             |         |          |       |
|----|--------------|-----------------------------|---------|----------|--------------|-----------------------------|---------|----------|-------|
|    |              | #CIs=36 #CIs>0=21 #CIs<0=15 |         | 16       | Singlet-SG   | 41.0629                     | 30.19   | 0.0690   | 0.000 |
|    |              |                             |         |          |              | max(1)=                     | 2 -> 7  | 0.67483  |       |
| 13 | Singlet-SG   | 37.0885                     | 33.43   | 0.1478   | 0.000        | max(2)=                     | 3 -> 11 | 0.06680  |       |
|    |              | max(1)=                     | 3 -> 10 | 0.52121  |              | max(3)=                     | 2 -> 11 | 0.00524  |       |
|    |              | max(2)=                     | 2 -> 7  | 0.10466  |              | max(4)=                     | 3 -> 7  | 0.00470  |       |
|    |              | max(3)=                     | 3 -> 7  | 0.06640  |              | max(5)=                     | 4 -> 22 | 0.00198  |       |
|    |              | max(4)=                     | 3 -> 6  | 0.02774  |              | min(1)=                     | 3 -> 10 | -0.18857 |       |
|    |              | max(5)=                     | 2 -> 11 | 0.02669  |              | min(2)=                     | 2 -> 6  | -0.04316 |       |
|    |              | min(1)=                     | 4 -> 8  | -0.31905 |              | min(3)=                     | 4 -> 8  | -0.03670 |       |
|    |              | min(2)=                     | 5 -> 9  | -0.31905 |              | min(4)=                     | 5 -> 9  | -0.03670 |       |
|    |              | min(3)=                     | 2 -> 6  | -0.08795 |              | min(5)=                     | 4 -> 18 | -0.00650 |       |
|    |              | min(4)=                     | 2 -> 14 | -0.00782 |              |                             |         |          |       |
|    |              | min(5)=                     | 3 -> 15 | -0.00628 |              | #CIs=26 #CIs>0=7 #CIs<0=19  |         |          |       |
|    |              | #CIs=26 #CIs>0=15 #CIs<0=11 |         | 17       | Singlet-?Sym | 43.6287                     | 28.42   | 0.2384   | 0.000 |
|    |              |                             |         |          |              | max(1)=                     | 5 -> 11 | 0.70330  |       |
| 14 | Singlet-?Sym | 37.4368                     | 33.12   | 0.0010   | 0.000        | max(2)=                     | 4 -> 11 | 0.04835  |       |
|    |              | max(1)=                     | 3 -> 9  | 0.70452  |              | max(3)=                     | 3 -> 13 | 0.04384  |       |
|    |              | max(2)=                     | 5 -> 10 | 0.05715  |              | max(4)=                     | 3 -> 9  | 0.00823  |       |
|    |              | max(3)=                     | 4 -> 17 | 0.00543  |              | max(5)=                     | 3 -> 19 | 0.00359  |       |
|    |              | max(4)=                     | 5 -> 16 | 0.00543  |              | min(1)=                     | 2 -> 9  | -0.03136 |       |
|    |              | max(5)=                     | 3 -> 19 | 0.00455  |              | min(2)=                     | 5 -> 6  | -0.00890 |       |
|    |              | min(1)=                     | 3 -> 13 | -0.01455 |              | min(3)=                     | 2 -> 13 | -0.00477 |       |
|    |              | min(2)=                     | 5 -> 11 | -0.00788 |              | min(4)=                     | 5 -> 20 | -0.00454 |       |
|    |              | min(3)=                     | 2 -> 9  | -0.00740 |              | min(5)=                     | 2 -> 8  | -0.00216 |       |
|    |              | min(4)=                     | 2 -> 13 | -0.00370 |              | #CIs=36 #CIs>0=17 #CIs<0=19 |         |          |       |
|    |              | min(5)=                     | 5 -> 20 | -0.00153 |              |                             |         |          |       |
|    |              | #CIs=28 #CIs>0=17 #CIs<0=11 |         | 18       | Singlet-?Sym | 43.6287                     | 28.42   | 0.2384   | 0.000 |
|    |              |                             |         |          |              | max(1)=                     | 4 -> 11 | 0.70330  |       |
| 15 | Singlet-?Sym | 37.4368                     | 33.12   | 0.0010   | 0.000        | max(2)=                     | 3 -> 12 | 0.04384  |       |
|    |              | max(1)=                     | 3 -> 8  | 0.70452  |              | max(3)=                     | 3 -> 8  | 0.00823  |       |
|    |              | max(2)=                     | 4 -> 10 | 0.05715  |              | max(4)=                     | 3 -> 18 | 0.00359  |       |
|    |              | max(3)=                     | 5 -> 17 | 0.00543  |              | max(5)=                     | 5 -> 17 | 0.00326  |       |
|    |              | max(4)=                     | 3 -> 18 | 0.00455  |              | min(1)=                     | 5 -> 11 | -0.04835 |       |
|    |              | max(5)=                     | 3 -> 22 | 0.00446  |              | min(2)=                     | 2 -> 8  | -0.03136 |       |
|    |              | min(1)=                     | 3 -> 12 | -0.01455 |              | min(3)=                     | 4 -> 6  | -0.00890 |       |
|    |              | min(2)=                     | 4 -> 11 | -0.00788 |              | min(4)=                     | 2 -> 12 | -0.00477 |       |
|    |              | min(3)=                     | 2 -> 8  | -0.00740 |              | min(5)=                     | 4 -> 20 | -0.00454 |       |
|    |              | min(4)=                     | 4 -> 16 | -0.00543 |              | #CIs=36 #CIs>0=17 #CIs<0=19 |         |          |       |
|    |              | min(5)=                     | 2 -> 12 | -0.00370 |              |                             |         |          |       |
|    |              | #CIs=28 #CIs>0=14 #CIs<0=14 |         | 19       | Singlet-?Sym | 45.5255                     | 27.23   | 0.0000   | 0.000 |
|    |              |                             |         |          |              | max(1)=                     | 4 -> 13 | 0.49999  |       |

|    |              |                           |         |          |       |            |                             |         |              |
|----|--------------|---------------------------|---------|----------|-------|------------|-----------------------------|---------|--------------|
|    |              | max(2)=                   | 5 -> 12 | 0.49999  |       |            | min(2)=                     | 5 -> 18 | -0.00391     |
|    |              | max(3)=                   | 3 -> 17 | 0.00086  |       |            | min(3)=                     | 5 -> 22 | -0.00026     |
|    |              | max(4)=                   | 2 -> 17 | 0.00085  |       |            | min(4)=                     | 5 -> 8  | -0.00022     |
|    |              | max(5)=                   | 5 -> 13 | 0.00075  |       |            | min(5)=                     | 4 -> 9  | 0.00022      |
|    |              | min(1)=                   | 4 -> 19 | -0.00318 |       |            | #CIs=8 #CIs>0=4 #CIs<0=4    |         |              |
|    |              | min(2)=                   | 5 -> 18 | -0.00318 |       |            |                             |         |              |
|    |              | min(3)=                   | 4 -> 12 | -0.00075 | 22    | Singlet-SG | 46.1756                     | 26.85   | 0.1086 0.000 |
|    |              | min(4)=                   | 4 -> 21 | -0.00001 |       |            | max(1)=                     | 3 -> 11 | 0.35181      |
|    |              | min(5)=                   | 5 -> 22 | -0.00001 |       |            | max(2)=                     | 2 -> 11 | 0.12650      |
|    |              | #CIs=12 #CIs>0=7 #CIs<0=5 |         |          |       |            | max(3)=                     | 3 -> 7  | 0.08663      |
| 20 | Singlet-?Sym | 45.5255                   | 27.23   | 0.0000   | 0.000 |            | max(4)=                     | 3 -> 14 | 0.04823      |
|    |              | max(1)=                   | 4 -> 12 | 0.49999  |       |            | max(5)=                     | 3 -> 6  | 0.03473      |
|    |              | max(2)=                   | 5 -> 19 | 0.00318  |       |            | min(1)=                     | 3 -> 10 | -0.31846     |
|    |              | max(3)=                   | 4 -> 13 | 0.00075  |       |            | min(2)=                     | 4 -> 8  | -0.27020     |
|    |              | max(4)=                   | 5 -> 12 | 0.00075  |       |            | min(3)=                     | 5 -> 9  | -0.27020     |
|    |              | max(5)=                   | 4 -> 8  | 0.00010  |       |            | min(4)=                     | 4 -> 12 | -0.19263     |
|    |              | min(1)=                   | 5 -> 13 | -0.49999 |       |            | min(5)=                     | 5 -> 13 | -0.19263     |
|    |              | min(2)=                   | 4 -> 18 | -0.00318 |       |            | #CIs=26 #CIs>0=13 #CIs<0=13 |         |              |
|    |              | min(3)=                   | 3 -> 16 | -0.00086 | 23    | Singlet-SG | 47.4801                     | 26.11   | 0.4714 0.000 |
|    |              | min(4)=                   | 2 -> 16 | -0.00085 |       |            | max(1)=                     | 3 -> 11 | 0.41253      |
|    |              | min(5)=                   | 5 -> 9  | -0.00010 |       |            | max(2)=                     | 4 -> 12 | 0.39957      |
|    |              | #CIs=12 #CIs>0=6 #CIs<0=6 |         |          |       |            | max(3)=                     | 5 -> 13 | 0.39957      |
| 21 | Singlet-?Sym | 45.5781                   | 27.20   | 0.0000   | 0.000 |            | max(4)=                     | 4 -> 18 | 0.01712      |
|    |              | max(1)=                   | 5 -> 12 | 0.49999  |       |            | max(5)=                     | 5 -> 19 | 0.01712      |
|    |              | max(2)=                   | 4 -> 19 | 0.00391  |       |            | min(1)=                     | 3 -> 14 | -0.05195     |
|    |              | max(3)=                   | 4 -> 21 | 0.00026  |       |            | min(2)=                     | 2 -> 10 | -0.04999     |
|    |              | max(4)=                   | 4 -> 9  | 0.00022  |       |            | min(3)=                     | 2 -> 7  | -0.04505     |
|    |              | max(5)=                   | 5 -> 8  | -0.00022 |       |            | min(4)=                     | 3 -> 7  | -0.03926     |
|    |              | min(1)=                   | 4 -> 13 | -0.49999 |       |            | min(5)=                     | 2 -> 6  | -0.02861     |
|    |              |                           |         |          |       |            | #CIs=25 #CIs>0=15 #CIs<0=10 |         |              |

### 5.1.3 Main contributions from different excited states at CIS approach

| #_exc.st | __symm__     | Exc.E   | Osc._Strength | __f__  | _ <s**2>_</s**2> |  |         |                  |
|----------|--------------|---------|---------------|--------|------------------|--|---------|------------------|
| 1        | Singlet-?Sym | 12.0824 | 102.62        | 0.0238 | 0.000            |  | max(4)= | 4 -> 10 0.02682  |
|          |              |         |               |        |                  |  | max(5)= | 5 -> 15 0.00971  |
|          |              |         |               |        |                  |  | min(1)= | 4 -> 6 -0.42020  |
|          |              |         |               |        |                  |  | min(2)= | 4 -> 7 -0.10263  |
|          |              |         |               |        |                  |  | min(3)= | 5 -> 10 -0.03444 |
|          |              |         |               |        |                  |  | min(4)= | 4 -> 11 -0.02727 |

|   |  |              |              |              |        |       |              |              |              |          |       |  |  |
|---|--|--------------|--------------|--------------|--------|-------|--------------|--------------|--------------|----------|-------|--|--|
|   |  | min(5)=      | 5 -> 14      | -0.01179     |        |       |              |              |              |          |       |  |  |
|   |  | #states=34   | #states>0=16 | #states<0=18 | 5      |       | Singlet-?Sym | 21.6414      | 57.29        | 0.0565   | 0.000 |  |  |
|   |  |              |              |              |        |       | max(1)=      | 4 -> 7       |              | 0.56812  |       |  |  |
| 2 |  | Singlet-?Sym | 12.0824      | 102.62       | 0.0238 | 0.000 | max(2)=      | 5 -> 7       |              | 0.37572  |       |  |  |
|   |  | max(1)=      | 4 -> 6       | 0.53959      |        |       | max(3)=      | 4 -> 15      |              | 0.01263  |       |  |  |
|   |  | max(2)=      | 5 -> 6       | 0.42020      |        |       | max(4)=      | 5 -> 15      |              | 0.00835  |       |  |  |
|   |  | max(3)=      | 4 -> 7       | 0.13179      |        |       | max(5)=      | 2 -> 12      |              | 0.00763  |       |  |  |
|   |  | max(4)=      | 5 -> 7       | 0.10263      |        |       | min(1)=      | 4 -> 6       |              | -0.14313 |       |  |  |
|   |  | max(5)=      | 4 -> 11      | 0.03502      |        |       | min(2)=      | 5 -> 6       |              | -0.09466 |       |  |  |
|   |  | min(1)=      | 4 -> 10      | -0.03444     |        |       | min(3)=      | 4 -> 10      |              | -0.05179 |       |  |  |
|   |  | min(2)=      | 5 -> 10      | -0.02682     |        |       | min(4)=      | 4 -> 14      |              | -0.03867 |       |  |  |
|   |  | min(3)=      | 4 -> 14      | -0.01179     |        |       | min(5)=      | 5 -> 10      |              | -0.03425 |       |  |  |
|   |  | min(4)=      | 5 -> 14      | -0.00918     |        |       | #states=36   | #states>0=17 | #states<0=19 |          |       |  |  |
|   |  | min(5)=      | 4 -> 23      | -0.00311     |        |       |              |              |              |          |       |  |  |
|   |  | #states=34   | #states>0=21 | #states<0=13 | 6      |       | Singlet-SG   | 27.0282      | 45.87        | 0.3872   | 0.000 |  |  |
|   |  |              |              |              |        |       | max(1)=      | 3 -> 7       |              | 0.68277  |       |  |  |
| 3 |  | Singlet-SG   | 16.4027      | 75.59        | 0.2385 | 0.000 | max(2)=      | 4 -> 8       |              | 0.10281  |       |  |  |
|   |  | max(1)=      | 3 -> 6       | 0.69825      |        |       | max(3)=      | 5 -> 9       |              | 0.10281  |       |  |  |
|   |  | max(2)=      | 3 -> 7       | 0.07072      |        |       | max(4)=      | 4 -> 12      |              | 0.03791  |       |  |  |
|   |  | max(3)=      | 4 -> 8       | 0.05015      |        |       | max(5)=      | 5 -> 13      |              | 0.03791  |       |  |  |
|   |  | max(4)=      | 5 -> 9       | 0.05015      |        |       | min(1)=      | 3 -> 6       |              | -0.08600 |       |  |  |
|   |  | max(5)=      | 3 -> 11      | 0.04267      |        |       | min(2)=      | 3 -> 10      |              | -0.02836 |       |  |  |
|   |  | min(1)=      | 3 -> 10      | -0.00654     |        |       | min(3)=      | 2 -> 7       |              | -0.02226 |       |  |  |
|   |  | min(2)=      | 2 -> 6       | -0.00604     |        |       | min(4)=      | 3 -> 14      |              | -0.01898 |       |  |  |
|   |  | min(3)=      | 2 -> 14      | -0.00566     |        |       | min(5)=      | 4 -> 19      |              | -0.00846 |       |  |  |
|   |  | min(4)=      | 3 -> 23      | -0.00179     |        |       | #states=24   | #states>0=14 | #states<0=10 |          |       |  |  |
|   |  | min(5)=      | 2 -> 23      | -0.00155     |        |       |              |              |              |          |       |  |  |
|   |  | #states=24   | #states>0=19 | #states<0=5  | 7      |       | Singlet-?Sym | 34.1898      | 36.26        | 0.0000   | 0.000 |  |  |
|   |  |              |              |              |        |       | max(1)=      | 5 -> 8       |              | 0.49975  |       |  |  |
| 4 |  | Singlet-?Sym | 21.6414      | 57.29        | 0.0565 | 0.000 | max(2)=      | 5 -> 22      |              | 0.01482  |       |  |  |
|   |  | max(1)=      | 5 -> 7       | 0.56812      |        |       | max(3)=      | 5 -> 12      |              | 0.00500  |       |  |  |
|   |  | max(2)=      | 4 -> 6       | 0.09466      |        |       | max(4)=      | 4 -> 18      |              | 0.00063  |       |  |  |
|   |  | max(3)=      | 4 -> 10      | 0.03425      |        |       | max(5)=      | 5 -> 19      |              | -0.00063 |       |  |  |
|   |  | max(4)=      | 4 -> 14      | 0.02557      |        |       | min(1)=      | 4 -> 9       |              | -0.49975 |       |  |  |
|   |  | max(5)=      | 5 -> 15      | 0.01263      |        |       | min(2)=      | 4 -> 21      |              | -0.01482 |       |  |  |
|   |  | min(1)=      | 4 -> 7       | -0.37572     |        |       | min(3)=      | 4 -> 13      |              | -0.00500 |       |  |  |
|   |  | min(2)=      | 5 -> 6       | -0.14313     |        |       | min(4)=      | 5 -> 19      |              | -0.00063 |       |  |  |
|   |  | min(3)=      | 5 -> 10      | -0.05179     |        |       | min(5)=      | 4 -> 18      |              | 0.00063  |       |  |  |
|   |  | min(4)=      | 5 -> 14      | -0.03867     |        |       | #states=8    | #states>0=4  | #states<0=4  |          |       |  |  |
|   |  | min(5)=      | 3 -> 13      | -0.00879     |        |       |              |              |              |          |       |  |  |
|   |  | #states=36   | #states>0=17 | #states<0=19 | 8      |       | Singlet-?Sym | 34.5435      | 35.89        | 0.0000   | 0.000 |  |  |

|    |              |                                      |         |          |       |  |              |                                      |         |          |       |  |  |
|----|--------------|--------------------------------------|---------|----------|-------|--|--------------|--------------------------------------|---------|----------|-------|--|--|
|    |              | max(1)=                              | 5 -> 9  | 0.49980  |       |  |              | max(3)=                              | 4 -> 11 | 0.03841  |       |  |  |
|    |              | max(2)=                              | 5 -> 21 | 0.01358  |       |  |              | max(4)=                              | 4 -> 6  | 0.02249  |       |  |  |
|    |              | max(3)=                              | 5 -> 13 | 0.00344  |       |  |              | max(5)=                              | 3 -> 9  | 0.01699  |       |  |  |
|    |              | max(4)=                              | 2 -> 17 | 0.00333  |       |  |              | min(1)=                              | 5 -> 10 | -0.31508 |       |  |  |
|    |              | max(5)=                              | 3 -> 17 | 0.00067  |       |  |              | min(2)=                              | 3 -> 8  | -0.03369 |       |  |  |
|    |              | min(1)=                              | 4 -> 8  | -0.49980 |       |  |              | min(3)=                              | 5 -> 7  | -0.03223 |       |  |  |
|    |              | min(2)=                              | 4 -> 22 | -0.01358 |       |  |              | min(4)=                              | 5 -> 11 | -0.01936 |       |  |  |
|    |              | min(3)=                              | 4 -> 12 | -0.00344 |       |  |              | min(5)=                              | 3 -> 12 | -0.01257 |       |  |  |
|    |              | min(4)=                              | 5 -> 18 | -0.00066 |       |  |              | #states=35 #states>0=18 #states<0=17 |         |          |       |  |  |
|    |              | min(5)=                              | 4 -> 19 | 0.00066  |       |  |              |                                      |         |          |       |  |  |
|    |              | #states=10 #states>0=6 #states<0=4   |         |          | 12    |  | Singlet-SG   | 38.0466                              | 32.59   | 0.0230   | 0.000 |  |  |
|    |              |                                      |         |          |       |  |              | max(1)=                              | 2 -> 6  | 0.53808  |       |  |  |
| 9  | Singlet-?Sym | 34.5435                              | 35.89   | 0.0000   | 0.000 |  |              | max(2)=                              | 3 -> 10 | 0.25213  |       |  |  |
|    |              | max(1)=                              | 4 -> 9  | 0.49980  |       |  |              | max(3)=                              | 2 -> 7  | 0.14849  |       |  |  |
|    |              | max(2)=                              | 5 -> 8  | 0.49980  |       |  |              | max(4)=                              | 3 -> 7  | 0.08412  |       |  |  |
|    |              | max(3)=                              | 4 -> 21 | 0.01358  |       |  |              | max(5)=                              | 2 -> 11 | 0.03692  |       |  |  |
|    |              | max(4)=                              | 5 -> 22 | 0.01358  |       |  |              | min(1)=                              | 4 -> 8  | -0.23618 |       |  |  |
|    |              | max(5)=                              | 4 -> 13 | 0.00344  |       |  |              | min(2)=                              | 5 -> 9  | -0.23618 |       |  |  |
|    |              | min(1)=                              | 2 -> 16 | -0.00333 |       |  |              | min(3)=                              | 2 -> 14 | -0.01129 |       |  |  |
|    |              | min(2)=                              | 3 -> 16 | -0.00067 |       |  |              | min(4)=                              | 2 -> 10 | -0.00979 |       |  |  |
|    |              | min(3)=                              | 4 -> 18 | -0.00066 |       |  |              | min(5)=                              | 4 -> 19 | -0.00574 |       |  |  |
|    |              | min(4)=                              | 5 -> 19 | -0.00066 |       |  |              | #states=25 #states>0=13 #states<0=12 |         |          |       |  |  |
|    |              | min(5)=                              | 4 -> 13 | 0.00344  |       |  |              |                                      |         |          |       |  |  |
|    |              | #states=10 #states>0=6 #states<0=4   |         |          | 13    |  | Singlet-?Sym | 38.5159                              | 32.19   | 0.0001   | 0.000 |  |  |
|    |              |                                      |         |          |       |  |              | max(1)=                              | 3 -> 8  | 0.69780  |       |  |  |
| 10 | Singlet-?Sym | 36.1022                              | 34.34   | 0.0014   | 0.000 |  |              | max(2)=                              | 3 -> 9  | 0.10225  |       |  |  |
|    |              | max(1)=                              | 5 -> 10 | 0.62498  |       |  |              | max(3)=                              | 4 -> 10 | 0.03564  |       |  |  |
|    |              | max(2)=                              | 4 -> 10 | 0.31508  |       |  |              | max(4)=                              | 4 -> 11 | 0.02616  |       |  |  |
|    |              | max(3)=                              | 5 -> 7  | 0.06394  |       |  |              | max(5)=                              | 3 -> 22 | 0.01715  |       |  |  |
|    |              | max(4)=                              | 5 -> 11 | 0.03841  |       |  |              | min(1)=                              | 2 -> 12 | -0.01288 |       |  |  |
|    |              | max(5)=                              | 4 -> 7  | 0.03223  |       |  |              | min(2)=                              | 2 -> 19 | -0.00511 |       |  |  |
|    |              | min(1)=                              | 3 -> 9  | -0.03369 |       |  |              | min(3)=                              | 4 -> 6  | -0.00402 |       |  |  |
|    |              | min(2)=                              | 3 -> 8  | -0.01699 |       |  |              | min(4)=                              | 2 -> 13 | -0.00189 |       |  |  |
|    |              | min(3)=                              | 3 -> 13 | -0.01257 |       |  |              | min(5)=                              | 4 -> 20 | -0.00109 |       |  |  |
|    |              | min(4)=                              | 5 -> 15 | -0.01026 |       |  |              | #states=33 #states>0=24 #states<0=9  |         |          |       |  |  |
|    |              | min(5)=                              | 3 -> 12 | -0.00634 |       |  |              |                                      |         |          |       |  |  |
|    |              | #states=35 #states>0=21 #states<0=14 |         |          | 14    |  | Singlet-?Sym | 38.5159                              | 32.19   | 0.0001   | 0.000 |  |  |
|    |              |                                      |         |          |       |  |              | max(1)=                              | 3 -> 9  | 0.69780  |       |  |  |
| 11 | Singlet-?Sym | 36.1022                              | 34.34   | 0.0014   | 0.000 |  |              | max(2)=                              | 5 -> 10 | 0.03564  |       |  |  |
|    |              | max(1)=                              | 4 -> 10 | 0.62498  |       |  |              | max(3)=                              | 5 -> 11 | 0.02616  |       |  |  |
|    |              | max(2)=                              | 4 -> 7  | 0.06394  |       |  |              | max(4)=                              | 3 -> 21 | 0.01715  |       |  |  |

|    |              |         |       |        |       |                                      |         |          |  |    |                                      |         |          |        |       |
|----|--------------|---------|-------|--------|-------|--------------------------------------|---------|----------|--|----|--------------------------------------|---------|----------|--------|-------|
|    |              |         |       |        |       | max(5)=                              | 2 -> 9  | 0.00592  |  |    | min(2)=                              | 4 -> 10 | -0.04034 |        |       |
|    |              |         |       |        |       | min(1)=                              | 3 -> 8  | -0.10225 |  |    | min(3)=                              | 3 -> 8  | -0.02493 |        |       |
|    |              |         |       |        |       | min(2)=                              | 2 -> 13 | -0.01288 |  |    | min(4)=                              | 4 -> 7  | -0.01206 |        |       |
|    |              |         |       |        |       | min(3)=                              | 4 -> 10 | -0.00522 |  |    | min(5)=                              | 4 -> 20 | -0.01188 |        |       |
|    |              |         |       |        |       | min(4)=                              | 2 -> 18 | -0.00511 |  |    | #states=31 #states>0=14 #states<0=17 |         |          |        |       |
|    |              |         |       |        |       | min(5)=                              | 5 -> 17 | -0.00421 |  |    |                                      |         |          |        |       |
|    |              |         |       |        |       | #states=33 #states>0=16 #states<0=17 |         |          |  | 18 | Singlet-SG                           | 47.2064 | 26.26    | 0.0982 | 0.000 |
|    |              |         |       |        |       |                                      |         |          |  |    | max(1)=                              | 2 -> 7  | 0.62911  |        |       |
| 15 | Singlet-SG   | 38.8694 | 31.90 | 0.2130 | 0.000 | max(2)=                              | 4 -> 12 | 0.08063  |  |    | max(3)=                              | 5 -> 13 | 0.08063  |        |       |
|    |              |         |       |        |       | max(3)=                              | 2 -> 10 | 0.04860  |  |    | max(4)=                              | 3 -> 7  | 0.03327  |        |       |
|    |              |         |       |        |       | max(4)=                              | 3 -> 7  | 0.08178  |  |    | max(5)=                              | 2 -> 11 | 0.01882  |        |       |
|    |              |         |       |        |       | max(5)=                              | 2 -> 10 | 0.02090  |  |    | min(1)=                              | 2 -> 6  | -0.19425 |        |       |
|    |              |         |       |        |       | min(1)=                              | 3 -> 6  | 0.02090  |  |    | min(2)=                              | 3 -> 10 | -0.17280 |        |       |
|    |              |         |       |        |       | min(2)=                              | 3 -> 14 | 0.02041  |  |    | min(3)=                              | 4 -> 8  | -0.09351 |        |       |
|    |              |         |       |        |       | min(3)=                              | 2 -> 6  | -0.40590 |  |    | min(4)=                              | 5 -> 9  | -0.09351 |        |       |
|    |              |         |       |        |       | min(4)=                              | 4 -> 8  | -0.19908 |  |    | min(5)=                              | 2 -> 10 | -0.04884 |        |       |
|    |              |         |       |        |       | min(5)=                              | 5 -> 9  | -0.19908 |  |    | #states=25 #states>0=13 #states<0=12 |         |          |        |       |
|    |              |         |       |        |       | min(5)=                              | 2 -> 7  | -0.05090 |  |    |                                      |         |          |        |       |
|    |              |         |       |        |       | min(5)=                              | 3 -> 15 | -0.01043 |  |    |                                      |         |          |        |       |
|    |              |         |       |        |       | #states=23 #states>0=14 #states<0=9  |         |          |  | 19 | Singlet-?Sym                         | 48.4145 | 25.61    | 0.0000 | 0.000 |
|    |              |         |       |        |       |                                      |         |          |  |    | max(1)=                              | 5 -> 13 | 0.49976  |        |       |
| 16 | Singlet-?Sym | 45.1100 | 27.48 | 0.2896 | 0.000 | max(2)=                              | 4 -> 19 | 0.01496  |  |    | max(3)=                              | 4 -> 8  | 0.00346  |        |       |
|    |              |         |       |        |       | max(3)=                              | 2 -> 9  | 0.02993  |  |    | max(4)=                              | 4 -> 22 | 0.00015  |        |       |
|    |              |         |       |        |       | max(4)=                              | 3 -> 13 | 0.02980  |  |    | max(5)=                              | 2 -> 17 | -0.00011 |        |       |
|    |              |         |       |        |       | max(5)=                              | 5 -> 15 | 0.02857  |  |    | min(1)=                              | 4 -> 12 | -0.49976 |        |       |
|    |              |         |       |        |       | min(1)=                              | 4 -> 16 | 0.00348  |  |    | min(2)=                              | 5 -> 18 | -0.01496 |        |       |
|    |              |         |       |        |       | min(2)=                              | 5 -> 6  | -0.04560 |  |    | min(3)=                              | 5 -> 9  | -0.00346 |        |       |
|    |              |         |       |        |       | min(3)=                              | 4 -> 11 | -0.04529 |  |    | min(4)=                              | 3 -> 17 | -0.00072 |        |       |
|    |              |         |       |        |       | min(4)=                              | 5 -> 10 | -0.04034 |  |    | min(5)=                              | 5 -> 21 | -0.00015 |        |       |
|    |              |         |       |        |       | min(5)=                              | 3 -> 9  | -0.02493 |  |    | #states=12 #states>0=4 #states<0=8   |         |          |        |       |
|    |              |         |       |        |       | min(5)=                              | 5 -> 7  | -0.01206 |  |    |                                      |         |          |        |       |
|    |              |         |       |        |       | #states=31 #states>0=13 #states<0=18 |         |          |  | 20 | Singlet-?Sym                         | 48.4145 | 25.61    | 0.0000 | 0.000 |
|    |              |         |       |        |       |                                      |         |          |  |    | max(1)=                              | 4 -> 13 | 0.49976  |        |       |
| 17 | Singlet-?Sym | 45.1100 | 27.48 | 0.2896 | 0.000 | max(2)=                              | 5 -> 12 | 0.49976  |  |    | max(3)=                              | 3 -> 16 | 0.00072  |        |       |
|    |              |         |       |        |       | max(3)=                              | 4 -> 11 | 0.70043  |  |    | max(4)=                              | 5 -> 13 | 0.00012  |        |       |
|    |              |         |       |        |       | max(4)=                              | 5 -> 11 | 0.04529  |  |    | max(5)=                              | 2 -> 16 | 0.00011  |        |       |
|    |              |         |       |        |       | max(5)=                              | 2 -> 8  | 0.02993  |  |    | min(1)=                              | 4 -> 18 | -0.01496 |        |       |
|    |              |         |       |        |       | min(1)=                              | 3 -> 12 | 0.02980  |  |    | min(2)=                              | 5 -> 19 | -0.01496 |        |       |
|    |              |         |       |        |       | min(2)=                              | 4 -> 15 | 0.02857  |  |    | min(3)=                              | 4 -> 9  | -0.00346 |        |       |
|    |              |         |       |        |       | min(3)=                              | 4 -> 6  | -0.04560 |  |    |                                      |         |          |        |       |

|    |              |                                    |         |          |       |  |              |                                      |         |          |          |  |  |
|----|--------------|------------------------------------|---------|----------|-------|--|--------------|--------------------------------------|---------|----------|----------|--|--|
|    |              | min(4)=                            | 5 -> 8  | -0.00346 |       |  |              | max(4)=                              | 2 -> 11 | 0.01561  |          |  |  |
|    |              | min(5)=                            | 4 -> 21 | -0.00015 |       |  |              | max(5)=                              | 3 -> 7  | 0.01530  |          |  |  |
|    |              | #states=12 #states>0=5 #states<0=7 |         |          |       |  |              |                                      | min(1)= | 4 -> 12  | -0.12835 |  |  |
|    |              |                                    |         |          |       |  |              | min(2)=                              | 5 -> 13 | -0.12835 |          |  |  |
| 21 | Singlet-?Sym | 48.5122                            | 25.56   | 0.0000   | 0.000 |  |              | min(3)=                              | 3 -> 10 | -0.08210 |          |  |  |
|    |              | max(1)=                            | 5 -> 12 | 0.49972  |       |  |              | min(4)=                              | 4 -> 8  | -0.05871 |          |  |  |
|    |              | max(2)=                            | 4 -> 18 | 0.01595  |       |  |              | min(5)=                              | 5 -> 9  | -0.05871 |          |  |  |
|    |              | max(3)=                            | 4 -> 9  | 0.00501  |       |  |              | #states=26 #states>0=13 #states<0=13 |         |          |          |  |  |
|    |              | max(4)=                            | 4 -> 21 | 0.00045  |       |  |              |                                      |         |          |          |  |  |
|    |              | max(5)=                            | 5 -> 22 | -0.00045 | 23    |  | Singlet-?Sym | 50.5029                              | 24.55   | 0.6813   | 0.000    |  |  |
|    |              | min(1)=                            | 4 -> 13 | -0.49972 |       |  |              | max(1)=                              | 4 -> 12 | 0.42459  |          |  |  |
|    |              | min(2)=                            | 5 -> 19 | -0.01595 |       |  |              | max(2)=                              | 5 -> 13 | 0.42459  |          |  |  |
|    |              | min(3)=                            | 5 -> 8  | -0.00501 |       |  |              | max(3)=                              | 3 -> 11 | 0.21226  |          |  |  |
|    |              | min(4)=                            | 5 -> 22 | -0.00045 |       |  |              | max(4)=                              | 4 -> 8  | 0.15236  |          |  |  |
|    |              | min(5)=                            | 4 -> 21 | 0.00045  |       |  |              | max(5)=                              | 5 -> 9  | 0.15236  |          |  |  |
|    |              | #states=8 #states>0=4 #states<0=4  |         |          |       |  |              |                                      | min(1)= | 3 -> 7   | -0.09358 |  |  |
|    |              |                                    |         |          |       |  |              | min(2)=                              | 3 -> 14 | -0.08157 |          |  |  |
|    |              |                                    |         |          |       |  |              | min(3)=                              | 2 -> 11 | -0.06761 |          |  |  |
| 22 | Singlet-SG   | 48.8362                            | 25.39   | 0.0809   | 0.000 |  |              | min(4)=                              | 2 -> 10 | -0.04123 |          |  |  |
|    |              | max(1)=                            | 3 -> 11 | 0.66958  |       |  |              | min(5)=                              | 3 -> 6  | -0.03072 |          |  |  |
|    |              | max(2)=                            | 2 -> 10 | 0.03031  |       |  |              | #states=26 #states>0=15 #states<0=11 |         |          |          |  |  |
|    |              | max(3)=                            | 3 -> 15 | 0.02673  |       |  |              |                                      |         |          |          |  |  |



## 5.2 6-311++G(d,p)

### 5.2.1 Plots

Figure S6: For HF molecule and 6-311++G(d,p) basis set, variation of  $\alpha_{ZZ}$  (top) and  $\beta_{ZZZ}$  (bottom) with respect to the number of orbitals (FIOs decomposition presented in this work, in Plots S6a and S6c) or states (SOS approaches, in Plots S6b and S6d). For  $\alpha$  FIOs, three approaches were considered: CPKS (CAM-B3LYP), CPHF and UPHF. For  $\beta$  FIOs, the results of CPKS and CPHF approaches are provided. All elements of the  $\beta$  tensor were recomputed with an error less than 0.01 au in the case of the FIOs. For SOS approach, TDDFT (CAM-B3LYP) and CIS methods were employed. Recomputed values of  $\alpha_{ZZ}$  and  $\beta_{ZZZ}$  for the different approaches are included in each plot. HOMO (H) and LUMO (L) are represented by blue and pink dotted lines, respectively.

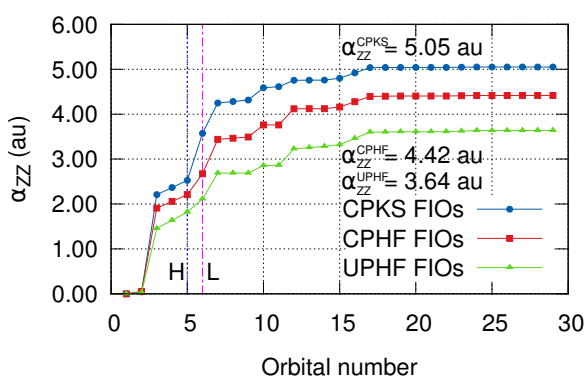

(a) CPKS-, CPHF- and UPHF-FIOs decomposition of  $\alpha_{ZZ}$  into MOs.

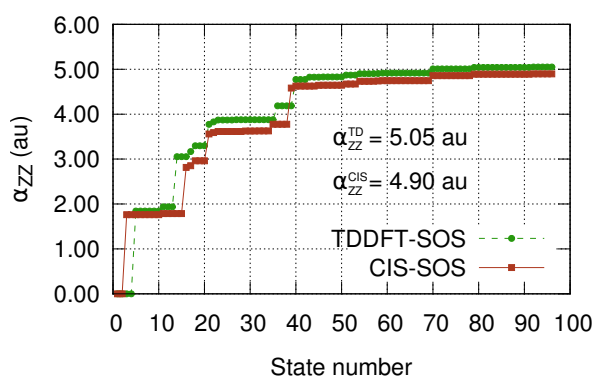

(b) TDDFT- and CIS-SOS decomposition of  $\alpha_{ZZ}$  into states.

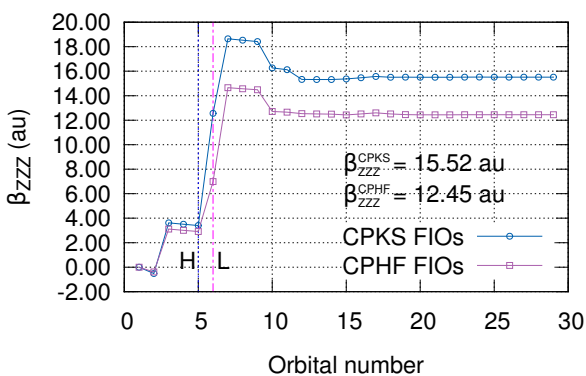

(c) CPKS- and CPHF-FIOs decomposition of  $\beta_{ZZZ}$  into MOs.

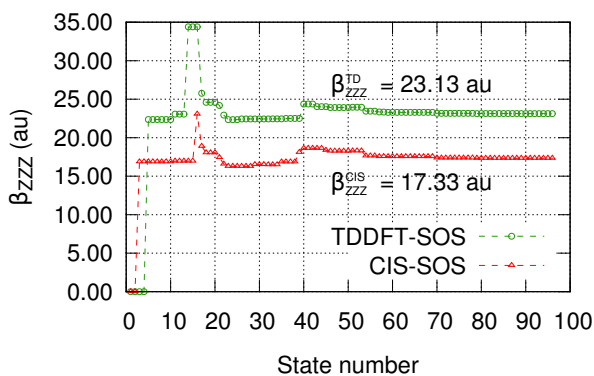

(d) TDDFT- and CIS-SOS decomposition of  $\beta_{ZZZ}$  into states.

### 5.2.2 Main contributions from different excited states at TDDFT (CAM-B3LYP) approach

| #_exc.st | __symm__     | Exc.E   | Osc._Strength | ___f___ | <S**2> | Singlet-?Sym                | 13.2757                     | 93.39    | 0.0161 | 0.000 |
|----------|--------------|---------|---------------|---------|--------|-----------------------------|-----------------------------|----------|--------|-------|
| 1        | Singlet-?Sym | 9.5784  | 129.44        | 0.0302  | 0.000  | max(1)=                     | 5 -> 7                      | 0.59902  |        |       |
|          |              |         |               |         |        | max(2)=                     | 4 -> 6                      | 0.07589  |        |       |
|          |              |         |               |         |        | max(3)=                     | 4 -> 10                     | 0.04715  |        |       |
|          |              |         |               |         |        | max(4)=                     | 4 -> 12                     | 0.03511  |        |       |
|          |              |         |               |         |        | max(5)=                     | 4 -> 15                     | 0.00482  |        |       |
|          |              |         |               |         |        | min(1)=                     | 4 -> 7                      | -0.31328 |        |       |
|          |              |         |               |         |        | min(2)=                     | 5 -> 6                      | -0.14512 |        |       |
|          |              |         |               |         |        | min(3)=                     | 5 -> 10                     | -0.09015 |        |       |
|          |              |         |               |         |        | min(4)=                     | 5 -> 12                     | -0.06714 |        |       |
|          |              |         |               |         |        | min(5)=                     | 5 -> 15                     | -0.00921 |        |       |
|          |              |         |               |         |        |                             | #CIs=46 #CIs>0=22 #CIs<0=24 |          |        |       |
|          |              |         |               |         |        | #CIs=46 #CIs>0=23 #CIs<0=23 |                             |          |        |       |
|          |              |         |               |         | 5      | Singlet-SG                  | 13.5686                     | 91.38    | 0.1527 | 0.000 |
|          |              |         |               |         |        | max(1)=                     | 3 -> 6                      | 0.68540  |        |       |
| 2        | Singlet-?Sym | 9.5784  | 129.44        | 0.0302  | 0.000  | max(2)=                     | 4 -> 8                      | 0.09770  |        |       |
|          |              |         |               |         |        | max(3)=                     | 5 -> 9                      | 0.09770  |        |       |
|          |              |         |               |         |        | max(4)=                     | 3 -> 7                      | 0.08276  |        |       |
|          |              |         |               |         |        | max(5)=                     | 3 -> 10                     | 0.04809  |        |       |
|          |              |         |               |         |        | min(1)=                     | 2 -> 12                     | -0.00588 |        |       |
|          |              |         |               |         |        | min(2)=                     | 4 -> 17                     | -0.00316 |        |       |
|          |              |         |               |         |        | min(3)=                     | 5 -> 16                     | -0.00316 |        |       |
|          |              |         |               |         |        | min(4)=                     | 2 -> 15                     | -0.00314 |        |       |
|          |              |         |               |         |        | min(5)=                     | 3 -> 15                     | -0.00280 |        |       |
|          |              |         |               |         |        |                             | #CIs=32 #CIs>0=19 #CIs<0=13 |          |        |       |
|          |              |         |               |         |        | #CIs=46 #CIs>0=24 #CIs<0=22 |                             |          |        |       |
|          |              |         |               |         | 6      | Singlet-?Sym                | 15.0780                     | 82.23    | 0.0000 | 0.000 |
|          |              |         |               |         |        | max(1)=                     | 5 -> 8                      | 0.49967  |        |       |
| 3        | Singlet-?Sym | 13.2757 | 93.39         | 0.0161  | 0.000  | max(2)=                     | 5 -> 14                     | 0.01782  |        |       |
|          |              |         |               |         |        | max(3)=                     | 5 -> 17                     | 0.00529  |        |       |
|          |              |         |               |         |        | max(4)=                     | 5 -> 26                     | 0.00034  |        |       |
|          |              |         |               |         |        | max(5)=                     | 4 -> 24                     | 0.00003  |        |       |
|          |              |         |               |         |        | min(1)=                     | 4 -> 9                      | -0.49967 |        |       |
|          |              |         |               |         |        | min(2)=                     | 4 -> 13                     | -0.01782 |        |       |
|          |              |         |               |         |        | min(3)=                     | 4 -> 16                     | -0.00529 |        |       |
|          |              |         |               |         |        | min(4)=                     | 4 -> 27                     | -0.00034 |        |       |
|          |              |         |               |         |        | min(5)=                     | 5 -> 23                     | -0.00003 |        |       |
|          |              |         |               |         |        |                             | #CIs=10 #CIs>0=5 #CIs<0=5   |          |        |       |
|          |              |         |               |         |        | #CIs=46 #CIs>0=23 #CIs<0=23 |                             |          |        |       |
|          |              |         |               |         | 7      | Singlet-?Sym                | 15.1837                     | 81.66    | 0.0000 | 0.000 |
|          |              |         |               |         |        | max(1)=                     | 4 -> 9                      | 0.49978  |        |       |



|    |              |                             |         |          |       |              |                             |         |          |       |
|----|--------------|-----------------------------|---------|----------|-------|--------------|-----------------------------|---------|----------|-------|
|    |              | min(1)=                     | 4 -> 11 | -0.10727 |       |              | min(3)=                     | 5 -> 15 | -0.00237 |       |
|    |              | min(2)=                     | 5 -> 6  | -0.04058 |       |              | min(4)=                     | 5 -> 21 | -0.00234 |       |
|    |              | min(3)=                     | 5 -> 15 | -0.01356 |       |              | min(5)=                     | 5 -> 18 | -0.00177 |       |
|    |              | min(4)=                     | 3 -> 8  | -0.00788 |       |              | #CIs=43 #CIs>0=21 #CIs<0=22 |         |          |       |
|    |              | min(5)=                     | 3 -> 16 | -0.00440 |       |              |                             |         |          |       |
|    |              | #CIs=47 #CIs>0=25 #CIs<0=22 |         |          | 17    | Singlet-SG   | 19.9758                     | 62.07   | 0.0203   | 0.000 |
| 14 | Singlet-SG   | 18.5639                     | 66.79   | 0.1732   | 0.000 |              | max(1)=                     | 3 -> 10 | 0.64226  |       |
|    |              |                             |         |          |       |              | max(2)=                     | 4 -> 8  | 0.15845  |       |
|    |              | max(1)=                     | 3 -> 7  | 0.58095  |       |              | max(3)=                     | 5 -> 9  | 0.15845  |       |
|    |              | max(2)=                     | 3 -> 10 | 0.23673  |       |              | max(4)=                     | 3 -> 11 | 0.09867  |       |
|    |              | max(3)=                     | 3 -> 12 | 0.03949  |       |              | max(5)=                     | 2 -> 12 | 0.00754  |       |
|    |              | max(4)=                     | 4 -> 14 | 0.03630  |       |              | min(1)=                     | 3 -> 7  | -0.12997 |       |
|    |              | max(5)=                     | 5 -> 13 | 0.03630  |       |              | min(2)=                     | 3 -> 6  | -0.07934 |       |
|    |              | min(1)=                     | 4 -> 8  | -0.22540 |       |              | min(3)=                     | 3 -> 12 | -0.05143 |       |
|    |              | min(2)=                     | 5 -> 9  | -0.22540 |       |              | min(4)=                     | 4 -> 14 | -0.03507 |       |
|    |              | min(3)=                     | 3 -> 11 | -0.03182 |       |              | min(5)=                     | 5 -> 13 | -0.03507 |       |
|    |              | min(4)=                     | 3 -> 6  | -0.02141 |       |              | #CIs=34 #CIs>0=13 #CIs<0=21 |         |          |       |
|    |              | min(5)=                     | 2 -> 12 | -0.01690 |       |              |                             |         |          |       |
|    |              | #CIs=33 #CIs>0=19 #CIs<0=14 |         |          | 18    | Singlet-SG   | 21.9019                     | 56.61   | 0.0283   | 0.000 |
| 15 | Singlet-?Sym | 18.8792                     | 65.67   | 0.0014   | 0.000 |              | max(1)=                     | 3 -> 11 | 0.69699  |       |
|    |              |                             |         |          |       |              | max(2)=                     | 3 -> 7  | 0.02726  |       |
|    |              | max(1)=                     | 3 -> 8  | 0.70473  |       |              | max(3)=                     | 3 -> 12 | 0.02201  |       |
|    |              | max(2)=                     | 3 -> 14 | 0.01951  |       |              | max(4)=                     | 2 -> 6  | 0.02033  |       |
|    |              | max(3)=                     | 3 -> 17 | 0.00878  |       |              | max(5)=                     | 2 -> 7  | 0.01850  |       |
|    |              | max(4)=                     | 4 -> 10 | 0.00439  |       |              | min(1)=                     | 3 -> 10 | -0.07745 |       |
|    |              | max(5)=                     | 3 -> 23 | 0.00235  |       |              | min(2)=                     | 4 -> 8  | -0.04874 |       |
|    |              | min(1)=                     | 4 -> 11 | -0.05198 |       |              | min(3)=                     | 5 -> 9  | -0.04874 |       |
|    |              | min(2)=                     | 3 -> 9  | -0.01326 |       |              | min(4)=                     | 3 -> 6  | -0.02803 |       |
|    |              | min(3)=                     | 2 -> 8  | -0.00249 |       |              | min(5)=                     | 2 -> 12 | -0.00687 |       |
|    |              | min(4)=                     | 4 -> 15 | -0.00237 |       |              | #CIs=33 #CIs>0=21 #CIs<0=12 |         |          |       |
|    |              | min(5)=                     | 4 -> 18 | -0.00177 |       |              |                             |         |          |       |
|    |              | #CIs=43 #CIs>0=23 #CIs<0=20 |         |          | 19    | Singlet-?Sym | 22.5967                     | 54.87   | 0.0250   | 0.000 |
| 16 | Singlet-?Sym | 18.8792                     | 65.67   | 0.0014   | 0.000 |              | max(1)=                     | 4 -> 12 | 0.59791  |       |
|    |              |                             |         |          |       |              | max(2)=                     | 5 -> 12 | 0.36723  |       |
|    |              | max(1)=                     | 3 -> 9  | 0.70473  |       |              | max(3)=                     | 4 -> 7  | 0.06976  |       |
|    |              | max(2)=                     | 3 -> 13 | 0.01951  |       |              | max(4)=                     | 5 -> 7  | 0.04284  |       |
|    |              | max(3)=                     | 3 -> 8  | 0.01326  |       |              | max(5)=                     | 4 -> 15 | 0.01263  |       |
|    |              | max(4)=                     | 3 -> 16 | 0.00878  |       |              | min(1)=                     | 4 -> 11 | -0.01271 |       |
|    |              | max(5)=                     | 5 -> 10 | 0.00439  |       |              | min(2)=                     | 4 -> 19 | -0.01107 |       |
|    |              | min(1)=                     | 5 -> 11 | -0.05198 |       |              | min(3)=                     | 5 -> 11 | -0.00781 |       |
|    |              | min(2)=                     | 2 -> 9  | -0.00249 |       |              | min(4)=                     | 3 -> 17 | -0.00683 |       |

|    |              |         |         |           |           |       |              |         |           |           |       |  |  |  |  |  |  |  |  |  |
|----|--------------|---------|---------|-----------|-----------|-------|--------------|---------|-----------|-----------|-------|--|--|--|--|--|--|--|--|--|
|    |              |         | min(5)= | 5 -> 19   | -0.00680  |       |              |         |           |           |       |  |  |  |  |  |  |  |  |  |
|    |              |         | #CIs=46 | #CIs>0=27 | #CIs<0=19 | 23    | Singlet-SG   | 35.2070 | 35.22     | 0.0229    | 0.000 |  |  |  |  |  |  |  |  |  |
|    |              |         |         |           |           |       |              | max(1)= | 2 -> 7    | 0.68655   |       |  |  |  |  |  |  |  |  |  |
| 20 | Singlet-?Sym | 22.5967 |         | 54.87     | 0.0250    | 0.000 |              | max(2)= | 4 -> 8    | 0.01356   |       |  |  |  |  |  |  |  |  |  |
|    |              |         | max(1)= | 5 -> 12   | 0.59791   |       |              | max(3)= | 5 -> 9    | 0.01356   |       |  |  |  |  |  |  |  |  |  |
|    |              |         | max(2)= | 5 -> 7    | 0.06976   |       |              | max(4)= | 3 -> 18   | 0.01188   |       |  |  |  |  |  |  |  |  |  |
|    |              |         | max(3)= | 5 -> 15   | 0.01263   |       |              | max(5)= | 3 -> 12   | 0.00803   |       |  |  |  |  |  |  |  |  |  |
|    |              |         | max(4)= | 2 -> 9    | 0.01024   |       |              | min(1)= | 2 -> 10   | -0.11122  |       |  |  |  |  |  |  |  |  |  |
|    |              |         | max(5)= | 5 -> 6    | 0.00794   |       |              | min(2)= | 2 -> 6    | -0.09972  |       |  |  |  |  |  |  |  |  |  |
|    |              |         | min(1)= | 4 -> 12   | -0.36723  |       |              | min(3)= | 2 -> 12   | -0.04923  |       |  |  |  |  |  |  |  |  |  |
|    |              |         | min(2)= | 4 -> 7    | -0.04284  |       |              | min(4)= | 2 -> 11   | -0.03786  |       |  |  |  |  |  |  |  |  |  |
|    |              |         | min(3)= | 5 -> 11   | -0.01271  |       |              | min(5)= | 4 -> 14   | -0.01987  |       |  |  |  |  |  |  |  |  |  |
|    |              |         | min(4)= | 5 -> 19   | -0.01107  |       |              | #CIs=32 | #CIs>0=8  | #CIs<0=24 |       |  |  |  |  |  |  |  |  |  |
|    |              |         | min(5)= | 4 -> 15   | -0.00775  |       |              |         |           |           |       |  |  |  |  |  |  |  |  |  |
|    |              |         | #CIs=46 | #CIs>0=24 | #CIs<0=22 | 24    | Singlet-?Sym | 37.0121 | 33.50     | 0.0164    | 0.000 |  |  |  |  |  |  |  |  |  |
|    |              |         |         |           |           |       |              | max(1)= | 2 -> 8    | 0.68553   |       |  |  |  |  |  |  |  |  |  |
| 21 | Singlet-SG   | 28.0003 |         | 44.28     | 0.1677    | 0.000 |              | max(2)= | 3 -> 17   | 0.01537   |       |  |  |  |  |  |  |  |  |  |
|    |              |         | max(1)= | 3 -> 12   | 0.69279   |       |              | max(3)= | 2 -> 14   | 0.01383   |       |  |  |  |  |  |  |  |  |  |
|    |              |         | max(2)= | 4 -> 8    | 0.04307   |       |              | max(4)= | 4 -> 21   | 0.00817   |       |  |  |  |  |  |  |  |  |  |
|    |              |         | max(3)= | 5 -> 9    | 0.04307   |       |              | max(5)= | 5 -> 22   | 0.00817   |       |  |  |  |  |  |  |  |  |  |
|    |              |         | max(4)= | 3 -> 10   | 0.02267   |       |              | min(1)= | 2 -> 9    | -0.16898  |       |  |  |  |  |  |  |  |  |  |
|    |              |         | max(5)= | 4 -> 17   | 0.02231   |       |              | min(2)= | 3 -> 14   | -0.01642  |       |  |  |  |  |  |  |  |  |  |
|    |              |         | min(1)= | 4 -> 14   | -0.06640  |       |              | min(3)= | 4 -> 15   | -0.01635  |       |  |  |  |  |  |  |  |  |  |
|    |              |         | min(2)= | 5 -> 13   | -0.06640  |       |              | min(4)= | 4 -> 18   | -0.01217  |       |  |  |  |  |  |  |  |  |  |
|    |              |         | min(3)= | 2 -> 6    | -0.06520  |       |              | min(5)= | 4 -> 12   | -0.01178  |       |  |  |  |  |  |  |  |  |  |
|    |              |         | min(4)= | 2 -> 10   | -0.03705  |       |              | #CIs=47 | #CIs>0=25 | #CIs<0=22 |       |  |  |  |  |  |  |  |  |  |
|    |              |         | min(5)= | 2 -> 7    | -0.02746  |       |              |         |           |           |       |  |  |  |  |  |  |  |  |  |
|    |              |         | #CIs=33 | #CIs>0=15 | #CIs<0=18 | 25    | Singlet-?Sym | 37.0121 | 33.50     | 0.0164    | 0.000 |  |  |  |  |  |  |  |  |  |
|    |              |         |         |           |           |       |              | max(1)= | 2 -> 9    | 0.68553   |       |  |  |  |  |  |  |  |  |  |
| 22 | Singlet-SG   | 31.5816 |         | 39.26     | 0.0249    | 0.000 |              | max(2)= | 2 -> 8    | 0.16898   |       |  |  |  |  |  |  |  |  |  |
|    |              |         | max(1)= | 2 -> 6    | 0.69172   |       |              | max(3)= | 3 -> 16   | 0.01537   |       |  |  |  |  |  |  |  |  |  |
|    |              |         | max(2)= | 2 -> 7    | 0.09990   |       |              | max(4)= | 2 -> 13   | 0.01383   |       |  |  |  |  |  |  |  |  |  |
|    |              |         | max(3)= | 3 -> 12   | 0.06033   |       |              | max(5)= | 4 -> 22   | 0.00817   |       |  |  |  |  |  |  |  |  |  |
|    |              |         | max(4)= | 2 -> 10   | 0.02592   |       |              | min(1)= | 3 -> 13   | -0.01642  |       |  |  |  |  |  |  |  |  |  |
|    |              |         | max(5)= | 4 -> 8    | 0.02170   |       |              | min(2)= | 5 -> 15   | -0.01635  |       |  |  |  |  |  |  |  |  |  |
|    |              |         | min(1)= | 4 -> 14   | -0.04758  |       |              | min(3)= | 5 -> 18   | -0.01217  |       |  |  |  |  |  |  |  |  |  |
|    |              |         | min(2)= | 5 -> 13   | -0.04758  |       |              | min(4)= | 5 -> 12   | -0.01178  |       |  |  |  |  |  |  |  |  |  |
|    |              |         | min(3)= | 3 -> 15   | -0.02596  |       |              | min(5)= | 5 -> 21   | -0.00817  |       |  |  |  |  |  |  |  |  |  |
|    |              |         | min(4)= | 3 -> 11   | -0.01921  |       |              | #CIs=47 | #CIs>0=26 | #CIs<0=21 |       |  |  |  |  |  |  |  |  |  |
|    |              |         | min(5)= | 4 -> 17   | -0.01828  |       |              |         |           |           |       |  |  |  |  |  |  |  |  |  |
|    |              |         | #CIs=33 | #CIs>0=13 | #CIs<0=20 | 26    | Singlet-SG   | 37.4162 | 33.14     | 0.0010    | 0.000 |  |  |  |  |  |  |  |  |  |

|    |              |                             |         |          |       |              |         |                             |         |          |  |  |
|----|--------------|-----------------------------|---------|----------|-------|--------------|---------|-----------------------------|---------|----------|--|--|
|    |              | max(1)=                     | 2 -> 10 | 0.69005  |       |              |         | max(3)=                     | 4 -> 16 | 0.00601  |  |  |
|    |              | max(2)=                     | 2 -> 7  | 0.09841  |       |              |         | max(4)=                     | 5 -> 17 | 0.00601  |  |  |
|    |              | max(3)=                     | 3 -> 12 | 0.02113  |       |              |         | max(5)=                     | 4 -> 27 | 0.00356  |  |  |
|    |              | max(4)=                     | 4 -> 8  | 0.01193  |       |              |         | min(1)=                     | 4 -> 9  | -0.01412 |  |  |
|    |              | max(5)=                     | 5 -> 9  | 0.01193  |       |              |         | min(2)=                     | 5 -> 8  | -0.01412 |  |  |
|    |              | min(1)=                     | 4 -> 14 | -0.07067 |       |              |         | min(3)=                     | 4 -> 24 | -0.00099 |  |  |
|    |              | min(2)=                     | 5 -> 13 | -0.07067 |       |              |         | min(4)=                     | 5 -> 23 | -0.00099 |  |  |
|    |              | min(3)=                     | 2 -> 6  | -0.05244 |       |              |         | min(5)=                     | 3 -> 22 | 0.00114  |  |  |
|    |              | min(4)=                     | 3 -> 15 | -0.01965 |       |              |         | #CIs=12 #CIs>0=8 #CIs<0=4   |         |          |  |  |
|    |              | min(5)=                     | 3 -> 7  | -0.01064 |       |              |         |                             |         |          |  |  |
|    |              | #CIs=34 #CIs>0=17 #CIs<0=17 |         |          | 30    | Singlet-?Sym | 42.0714 | 29.47                       | 0.0000  | 0.0000   |  |  |
|    |              |                             |         |          |       |              |         | max(1)=                     | 5 -> 13 | 0.49975  |  |  |
| 27 | Singlet-SG   | 39.8666                     | 31.10   | 0.0044   | 0.000 |              |         | max(2)=                     | 4 -> 8  | 0.01412  |  |  |
|    |              | max(1)=                     | 2 -> 11 | 0.69972  |       |              |         | max(3)=                     | 5 -> 16 | 0.00601  |  |  |
|    |              | max(2)=                     | 2 -> 12 | 0.03729  |       |              |         | max(4)=                     | 5 -> 27 | 0.00356  |  |  |
|    |              | max(3)=                     | 2 -> 7  | 0.02974  |       |              |         | max(5)=                     | 4 -> 23 | 0.00099  |  |  |
|    |              | max(4)=                     | 3 -> 10 | 0.00959  |       |              |         | min(1)=                     | 4 -> 14 | -0.49975 |  |  |
|    |              | max(5)=                     | 2 -> 18 | 0.00497  |       |              |         | min(2)=                     | 5 -> 9  | -0.01412 |  |  |
|    |              | min(1)=                     | 4 -> 14 | -0.05116 |       |              |         | min(3)=                     | 4 -> 17 | -0.00601 |  |  |
|    |              | min(2)=                     | 5 -> 13 | -0.05116 |       |              |         | min(4)=                     | 4 -> 26 | -0.00356 |  |  |
|    |              | min(3)=                     | 2 -> 6  | -0.03258 |       |              |         | min(5)=                     | 2 -> 21 | -0.00201 |  |  |
|    |              | min(4)=                     | 4 -> 17 | -0.02218 |       |              |         | #CIs=12 #CIs>0=5 #CIs<0=7   |         |          |  |  |
|    |              | min(5)=                     | 5 -> 16 | -0.02218 |       |              |         |                             |         |          |  |  |
|    |              | #CIs=33 #CIs>0=13 #CIs<0=20 |         |          | 31    | Singlet-?Sym | 43.4895 | 28.51                       | 0.0018  | 0.0000   |  |  |
|    |              |                             |         |          |       |              |         | max(1)=                     | 5 -> 15 | 0.58358  |  |  |
| 28 | Singlet-?Sym | 41.8623                     | 29.62   | 0.0000   | 0.000 |              |         | max(2)=                     | 4 -> 15 | 0.39205  |  |  |
|    |              | max(1)=                     | 4 -> 13 | 0.49947  |       |              |         | max(3)=                     | 3 -> 16 | 0.01818  |  |  |
|    |              | max(2)=                     | 5 -> 8  | 0.01793  |       |              |         | max(4)=                     | 3 -> 17 | 0.01221  |  |  |
|    |              | max(3)=                     | 4 -> 16 | 0.01420  |       |              |         | max(5)=                     | 5 -> 11 | 0.01217  |  |  |
|    |              | max(4)=                     | 4 -> 27 | 0.00364  |       |              |         | min(1)=                     | 3 -> 13 | -0.05338 |  |  |
|    |              | max(5)=                     | 5 -> 23 | 0.00128  |       |              |         | min(2)=                     | 3 -> 14 | -0.03586 |  |  |
|    |              | min(1)=                     | 5 -> 14 | -0.49947 |       |              |         | min(3)=                     | 5 -> 12 | -0.01262 |  |  |
|    |              | min(2)=                     | 4 -> 9  | -0.01793 |       |              |         | min(4)=                     | 5 -> 10 | -0.01083 |  |  |
|    |              | min(3)=                     | 5 -> 17 | -0.01420 |       |              |         | min(5)=                     | 4 -> 12 | -0.00848 |  |  |
|    |              | min(4)=                     | 5 -> 26 | -0.00364 |       |              |         | #CIs=46 #CIs>0=29 #CIs<0=17 |         |          |  |  |
|    |              | min(5)=                     | 4 -> 24 | -0.00128 |       |              |         |                             |         |          |  |  |
|    |              | #CIs=10 #CIs>0=5 #CIs<0=5   |         |          | 32    | Singlet-?Sym | 43.4895 | 28.51                       | 0.0018  | 0.0000   |  |  |
|    |              |                             |         |          |       |              |         | max(1)=                     | 4 -> 15 | 0.58358  |  |  |
| 29 | Singlet-?Sym | 42.0714                     | 29.47   | 0.0000   | 0.000 |              |         | max(2)=                     | 3 -> 13 | 0.03586  |  |  |
|    |              | max(1)=                     | 4 -> 13 | 0.49975  |       |              |         | max(3)=                     | 3 -> 17 | 0.01818  |  |  |
|    |              | max(2)=                     | 5 -> 14 | 0.49975  |       |              |         | max(4)=                     | 4 -> 11 | 0.01217  |  |  |

|    |              |                             |         |          |       |    |              |                             |         |          |       |  |  |
|----|--------------|-----------------------------|---------|----------|-------|----|--------------|-----------------------------|---------|----------|-------|--|--|
|    |              | max(5)=                     | 2 -> 8  | 0.01202  |       |    |              | min(2)=                     | 5 -> 21 | -0.00797 |       |  |  |
|    |              | min(1)=                     | 5 -> 15 | -0.39205 |       |    |              | min(3)=                     | 2 -> 13 | -0.00703 |       |  |  |
|    |              | min(2)=                     | 3 -> 14 | -0.05338 |       |    |              | min(4)=                     | 5 -> 19 | -0.00687 |       |  |  |
|    |              | min(3)=                     | 4 -> 12 | -0.01262 |       |    |              | min(5)=                     | 5 -> 12 | -0.00451 |       |  |  |
|    |              | min(4)=                     | 3 -> 16 | -0.01221 |       |    |              | #CIs=41 #CIs>0=26 #CIs<0=15 |         |          |       |  |  |
|    |              | min(5)=                     | 4 -> 10 | -0.01083 |       |    |              |                             |         |          |       |  |  |
|    |              | #CIs=46 #CIs>0=24 #CIs<0=22 |         |          |       | 36 | Singlet-SG   | 46.0142                     | 26.94   | 0.2948   | 0.000 |  |  |
|    |              |                             |         |          |       |    |              | max(1)=                     | 3 -> 15 | 0.49866  |       |  |  |
| 33 | Singlet-SG   | 44.3180                     | 27.98   | 0.0000   | 0.000 |    |              | max(2)=                     | 2 -> 12 | 0.25054  |       |  |  |
|    |              | max(1)=                     | 2 -> 12 | 0.64836  |       |    |              | max(3)=                     | 3 -> 7  | 0.03128  |       |  |  |
|    |              | max(2)=                     | 4 -> 14 | 0.17401  |       |    |              | max(4)=                     | 2 -> 18 | 0.02582  |       |  |  |
|    |              | max(3)=                     | 5 -> 13 | 0.17401  |       |    |              | max(5)=                     | 3 -> 6  | 0.01620  |       |  |  |
|    |              | max(4)=                     | 2 -> 7  | 0.06048  |       |    |              | min(1)=                     | 4 -> 14 | -0.29831 |       |  |  |
|    |              | max(5)=                     | 2 -> 10 | 0.03196  |       |    |              | min(2)=                     | 5 -> 13 | -0.29831 |       |  |  |
|    |              | min(1)=                     | 3 -> 15 | -0.11051 |       |    |              | min(3)=                     | 3 -> 12 | -0.05786 |       |  |  |
|    |              | min(2)=                     | 3 -> 18 | -0.02780 |       |    |              | min(4)=                     | 2 -> 11 | -0.04490 |       |  |  |
|    |              | min(3)=                     | 2 -> 11 | -0.01301 |       |    |              | min(5)=                     | 2 -> 10 | -0.04298 |       |  |  |
|    |              | min(4)=                     | 2 -> 19 | -0.01013 |       |    |              | #CIs=33 #CIs>0=14 #CIs<0=19 |         |          |       |  |  |
|    |              | min(5)=                     | 2 -> 18 | -0.00901 |       |    |              |                             |         |          |       |  |  |
|    |              | #CIs=34 #CIs>0=23 #CIs<0=11 |         |          |       | 37 | Singlet-?Sym | 46.4005                     | 26.72   | 0.0000   | 0.000 |  |  |
|    |              |                             |         |          |       |    |              | max(1)=                     | 4 -> 16 | 0.49993  |       |  |  |
| 34 | Singlet-?Sym | 46.0076                     | 26.95   | 0.0141   | 0.000 |    |              | max(2)=                     | 5 -> 17 | 0.49993  |       |  |  |
|    |              | max(1)=                     | 3 -> 14 | 0.70034  |       |    |              | max(3)=                     | 4 -> 24 | 0.00303  |       |  |  |
|    |              | max(2)=                     | 3 -> 17 | 0.06914  |       |    |              | max(4)=                     | 5 -> 23 | 0.00303  |       |  |  |
|    |              | max(3)=                     | 4 -> 15 | 0.06144  |       |    |              | max(5)=                     | 4 -> 27 | 0.00115  |       |  |  |
|    |              | max(4)=                     | 2 -> 8  | 0.01662  |       |    |              | min(1)=                     | 4 -> 13 | -0.00614 |       |  |  |
|    |              | max(5)=                     | 4 -> 21 | 0.00797  |       |    |              | min(2)=                     | 5 -> 14 | -0.00614 |       |  |  |
|    |              | min(1)=                     | 3 -> 8  | -0.02005 |       |    |              | min(3)=                     | 4 -> 9  | -0.00441 |       |  |  |
|    |              | min(2)=                     | 3 -> 13 | -0.00839 |       |    |              | min(4)=                     | 5 -> 8  | -0.00441 |       |  |  |
|    |              | min(3)=                     | 2 -> 14 | -0.00703 |       |    |              | min(5)=                     | 3 -> 22 | -0.00054 |       |  |  |
|    |              | min(4)=                     | 4 -> 19 | -0.00687 |       |    |              | #CIs=12 #CIs>0=6 #CIs<0=6   |         |          |       |  |  |
|    |              | min(5)=                     | 4 -> 12 | -0.00451 |       |    |              |                             |         |          |       |  |  |
|    |              | #CIs=41 #CIs>0=23 #CIs<0=18 |         |          |       | 38 | Singlet-?Sym | 46.4005                     | 26.72   | 0.0000   | 0.000 |  |  |
|    |              |                             |         |          |       |    |              | max(1)=                     | 5 -> 16 | 0.49993  |       |  |  |
| 35 | Singlet-?Sym | 46.0076                     | 26.95   | 0.0141   | 0.000 |    |              | max(2)=                     | 4 -> 14 | 0.00614  |       |  |  |
|    |              | max(1)=                     | 3 -> 13 | 0.70034  |       |    |              | max(3)=                     | 4 -> 8  | 0.00441  |       |  |  |
|    |              | max(2)=                     | 3 -> 16 | 0.06914  |       |    |              | max(4)=                     | 5 -> 24 | 0.00303  |       |  |  |
|    |              | max(3)=                     | 5 -> 15 | 0.06144  |       |    |              | max(5)=                     | 5 -> 27 | 0.00115  |       |  |  |
|    |              | max(4)=                     | 2 -> 9  | 0.01662  |       |    |              | min(1)=                     | 4 -> 17 | -0.49993 |       |  |  |
|    |              | max(5)=                     | 3 -> 14 | 0.00839  |       |    |              | min(2)=                     | 5 -> 13 | -0.00614 |       |  |  |
|    |              | min(1)=                     | 3 -> 9  | -0.02005 |       |    |              | min(3)=                     | 5 -> 9  | -0.00441 |       |  |  |

|    |              |                           |         |          |       |              |                             |         |          |       |  |
|----|--------------|---------------------------|---------|----------|-------|--------------|-----------------------------|---------|----------|-------|--|
|    |              | min(4)=                   | 4 -> 23 | -0.00303 |       |              | max(4)=                     | 3 -> 7  | 0.02273  |       |  |
|    |              | min(5)=                   | 4 -> 26 | -0.00115 |       |              | max(5)=                     | 3 -> 18 | 0.02161  |       |  |
|    |              | #CIs=12 #CIs>0=7 #CIs<0=5 |         |          |       |              | min(1)=                     | 3 -> 15 | -0.18122 |       |  |
|    |              |                           |         |          |       |              | min(2)=                     | 4 -> 14 | -0.14689 |       |  |
| 39 | Singlet-?Sym | 46.4344                   | 26.70   | 0.0000   | 0.000 |              | min(3)=                     | 5 -> 13 | -0.14689 |       |  |
|    |              | max(1)=                   | 4 -> 16 | 0.49976  |       |              | min(4)=                     | 3 -> 12 | -0.05964 |       |  |
|    |              | max(2)=                   | 5 -> 14 | 0.01437  |       |              | min(5)=                     | 3 -> 19 | -0.05207 |       |  |
|    |              | max(3)=                   | 5 -> 8  | 0.00477  |       |              | #CIs=34 #CIs>0=18 #CIs<0=16 |         |          |       |  |
|    |              | max(4)=                   | 4 -> 24 | 0.00368  |       |              |                             |         |          |       |  |
|    |              | max(5)=                   | 4 -> 27 | 0.00135  | 41    | Singlet-?Sym | 50.8965                     | 24.36   | 0.3830   | 0.000 |  |
|    |              | min(1)=                   | 5 -> 17 | -0.49976 |       |              | max(1)=                     | 3 -> 17 | 0.59677  |       |  |
|    |              | min(2)=                   | 4 -> 13 | -0.01437 |       |              | max(2)=                     | 3 -> 16 | 0.36549  |       |  |
|    |              | min(3)=                   | 4 -> 9  | -0.00477 |       |              | max(3)=                     | 4 -> 19 | 0.01624  |       |  |
|    |              | min(4)=                   | 5 -> 23 | -0.00368 |       |              | max(4)=                     | 5 -> 19 | 0.00995  |       |  |
|    |              | min(5)=                   | 5 -> 26 | -0.00135 |       |              | max(5)=                     | 4 -> 12 | 0.00823  |       |  |
|    |              | #CIs=10 #CIs>0=5 #CIs<0=5 |         |          |       |              | min(1)=                     | 3 -> 14 | -0.05625 |       |  |
|    |              |                           |         |          |       |              | min(2)=                     | 4 -> 18 | -0.05329 |       |  |
| 40 | Singlet-?Sym | 47.7941                   | 25.94   | 0.6017   | 0.000 |              | min(3)=                     | 3 -> 13 | -0.03445 |       |  |
|    |              | max(1)=                   | 4 -> 17 | 0.45504  |       |              | min(4)=                     | 5 -> 18 | -0.03264 |       |  |
|    |              | max(2)=                   | 5 -> 16 | 0.45504  |       |              | min(5)=                     | 4 -> 15 | -0.02262 |       |  |
|    |              | max(3)=                   | 2 -> 12 | 0.03458  |       |              | #CIs=48 #CIs>0=23 #CIs<0=25 |         |          |       |  |

### 5.2.3 Main contributions from different excited states at CIS approach

| #_exc.st | __symm__     | Exc.E                       | Osc._Strength | __f__    | _ <s**2>_</s**2> |            | max(1)= |         |          |       |
|----------|--------------|-----------------------------|---------------|----------|------------------|------------|---------|---------|----------|-------|
| 1        | Singlet-?Sym | 11.9145                     | 104.06        | 0.0300   | 0.000            |            | max(1)= | 4 -> 6  | 0.52373  |       |
|          |              | max(1)=                     | 5 -> 6        | 0.52373  |                  |            | max(2)= | 4 -> 7  | 0.30641  |       |
|          |              | max(2)=                     | 5 -> 7        | 0.30641  |                  |            | max(3)= | 5 -> 6  | 0.26468  |       |
|          |              | max(3)=                     | 5 -> 11       | 0.11227  |                  |            | max(4)= | 5 -> 7  | 0.15485  |       |
|          |              | max(4)=                     | 5 -> 10       | 0.06641  |                  |            | max(5)= | 4 -> 11 | 0.11227  |       |
|          |              | max(5)=                     | 4 -> 12       | 0.05477  |                  |            | min(1)= | 4 -> 12 | -0.10838 |       |
|          |              | min(1)=                     | 4 -> 6        | -0.26468 |                  |            | min(2)= | 5 -> 12 | -0.05477 |       |
|          |              | min(2)=                     | 4 -> 7        | -0.15485 |                  |            | min(3)= | 4 -> 15 | -0.02697 |       |
|          |              | min(3)=                     | 5 -> 12       | -0.10838 |                  |            | min(4)= | 5 -> 15 | -0.01363 |       |
|          |              | min(4)=                     | 4 -> 11       | -0.05674 |                  |            | min(5)= | 4 -> 19 | -0.01297 |       |
|          |              | min(5)=                     | 4 -> 10       | -0.03356 | 3                | Singlet-SG | 15.7111 | 78.91   | 0.1958   | 0.000 |
|          |              | #CIs=44 #CIs>0=21 #CIs<0=23 |               |          |                  |            | max(1)= | 3 -> 6  | 0.60306  |       |
|          |              |                             |               |          |                  |            | max(2)= | 3 -> 7  | 0.26720  |       |
| 2        | Singlet-?Sym | 11.9145                     | 104.06        | 0.0300   | 0.000            |            | max(3)= | 4 -> 9  | 0.13778  |       |



|   |  |                             |         |          |        |       |                           |         |          |        |       |
|---|--|-----------------------------|---------|----------|--------|-------|---------------------------|---------|----------|--------|-------|
|   |  | max(4)=                     | 5 -> 8  | 0.13778  |        |       | min(1)=                   | 4 -> 8  | -0.49683 |        |       |
|   |  | max(5)=                     | 3 -> 11 | 0.11576  |        |       | min(2)=                   | 4 -> 13 | -0.05371 |        |       |
|   |  | min(1)=                     | 3 -> 12 | -0.05736 |        |       | min(3)=                   | 4 -> 16 | -0.01621 |        |       |
|   |  | min(2)=                     | 3 -> 15 | -0.01597 |        |       | min(4)=                   | 4 -> 26 | -0.00329 |        |       |
|   |  | min(3)=                     | 2 -> 7  | -0.01411 |        |       | min(5)=                   | 5 -> 23 | -0.00013 |        |       |
|   |  | min(4)=                     | 2 -> 6  | -0.00498 |        |       | #CIs=10 #CIs>0=5 #CIs<0=5 |         |          |        |       |
|   |  | min(5)=                     | 2 -> 19 | -0.00458 |        |       |                           |         |          |        |       |
|   |  | #CIs=30 #CIs>0=21 #CIs<0=9  |         |          |        | 7     | Singlet-?Sym              | 17.2989 | 71.67    | 0.0000 | 0.000 |
|   |  |                             |         |          |        |       | max(1)=                   | 4 -> 8  | 0.49736  |        |       |
| 4 |  | Singlet-?Sym                | 15.7979 | 78.48    | 0.0261 | 0.000 | max(2)=                   | 5 -> 9  | 0.49736  |        |       |
|   |  | max(1)=                     | 5 -> 7  | 0.55625  |        |       | max(3)=                   | 4 -> 13 | 0.04884  |        |       |
|   |  | max(2)=                     | 4 -> 7  | 0.04469  |        |       | max(4)=                   | 5 -> 14 | 0.04884  |        |       |
|   |  | max(3)=                     | 5 -> 20 | 0.00696  |        |       | max(5)=                   | 4 -> 16 | 0.01529  |        |       |
|   |  | max(4)=                     | 3 -> 16 | 0.00371  |        |       | min(1)=                   | 2 -> 22 | -0.00166 |        |       |
|   |  | max(5)=                     | 4 -> 22 | 0.00185  |        |       | min(2)=                   | 4 -> 9  | -0.00070 |        |       |
|   |  | min(1)=                     | 5 -> 6  | -0.33730 |        |       | min(3)=                   | 3 -> 22 | -0.00027 |        |       |
|   |  | min(2)=                     | 5 -> 10 | -0.20533 |        |       | min(4)=                   | 4 -> 24 | -0.00019 |        |       |
|   |  | min(3)=                     | 5 -> 12 | -0.17067 |        |       | min(5)=                   | 5 -> 23 | -0.00019 |        |       |
|   |  | min(4)=                     | 5 -> 15 | -0.04318 |        |       | #CIs=14 #CIs>0=9 #CIs<0=5 |         |          |        |       |
|   |  | min(5)=                     | 4 -> 6  | -0.02709 |        |       |                           |         |          |        |       |
|   |  | #CIs=41 #CIs>0=17 #CIs<0=24 |         |          |        | 8     | Singlet-?Sym              | 17.2989 | 71.67    | 0.0000 | 0.000 |
|   |  |                             |         |          |        |       | max(1)=                   | 5 -> 8  | 0.49736  |        |       |
| 5 |  | Singlet-?Sym                | 15.7979 | 78.48    | 0.0261 | 0.000 | max(2)=                   | 5 -> 13 | 0.04884  |        |       |
|   |  | max(1)=                     | 4 -> 7  | 0.55625  |        |       | max(3)=                   | 5 -> 16 | 0.01529  |        |       |
|   |  | max(2)=                     | 5 -> 6  | 0.02709  |        |       | max(4)=                   | 5 -> 26 | 0.00282  |        |       |
|   |  | max(3)=                     | 5 -> 10 | 0.01650  |        |       | max(5)=                   | 2 -> 21 | 0.00166  |        |       |
|   |  | max(4)=                     | 5 -> 12 | 0.01371  |        |       | min(1)=                   | 4 -> 9  | -0.49736 |        |       |
|   |  | max(5)=                     | 4 -> 20 | 0.00696  |        |       | min(2)=                   | 4 -> 14 | -0.04884 |        |       |
|   |  | min(1)=                     | 4 -> 6  | -0.33730 |        |       | min(3)=                   | 4 -> 17 | -0.01529 |        |       |
|   |  | min(2)=                     | 4 -> 10 | -0.20533 |        |       | min(4)=                   | 4 -> 27 | -0.00282 |        |       |
|   |  | min(3)=                     | 4 -> 12 | -0.17067 |        |       | min(5)=                   | 4 -> 8  | -0.00070 |        |       |
|   |  | min(4)=                     | 5 -> 7  | -0.04469 |        |       | #CIs=14 #CIs>0=7 #CIs<0=7 |         |          |        |       |
|   |  | min(5)=                     | 4 -> 15 | -0.04318 |        |       |                           |         |          |        |       |
|   |  | #CIs=41 #CIs>0=23 #CIs<0=18 |         |          |        | 9     | Singlet-?Sym              | 18.1234 | 68.41    | 0.0314 | 0.000 |
|   |  |                             |         |          |        |       | max(1)=                   | 5 -> 10 | 0.66525  |        |       |
| 6 |  | Singlet-?Sym                | 17.2784 | 71.76    | 0.0000 | 0.000 | max(2)=                   | 5 -> 7  | 0.12381  |        |       |
|   |  | max(1)=                     | 5 -> 9  | 0.49683  |        |       | max(3)=                   | 5 -> 11 | 0.06687  |        |       |
|   |  | max(2)=                     | 5 -> 14 | 0.05371  |        |       | max(4)=                   | 5 -> 18 | 0.03270  |        |       |
|   |  | max(3)=                     | 5 -> 17 | 0.01621  |        |       | max(5)=                   | 5 -> 15 | 0.03232  |        |       |
|   |  | max(4)=                     | 5 -> 27 | 0.00329  |        |       | min(1)=                   | 5 -> 6  | -0.18092 |        |       |
|   |  | max(5)=                     | 4 -> 24 | 0.00013  |        |       | min(2)=                   | 5 -> 12 | -0.04824 |        |       |

|    |              |         |           |           |       |    |              |         |           |           |       |  |  |  |
|----|--------------|---------|-----------|-----------|-------|----|--------------|---------|-----------|-----------|-------|--|--|--|
|    |              | min(3)= | 5 -> 21   | -0.00408  |       |    |              | min(5)= | 5 -> 7    | -0.06087  |       |  |  |  |
|    |              | min(4)= | 4 -> 10   | -0.00379  |       |    |              | #CIs=43 | #CIs>0=21 | #CIs<0=22 |       |  |  |  |
|    |              | min(5)= | 5 -> 19   | -0.00280  |       |    |              |         |           |           |       |  |  |  |
|    |              | #CIs=31 | #CIs>0=17 | #CIs<0=14 |       | 13 | Singlet-?Sym | 20.7628 | 59.71     | 0.0525    | 0.000 |  |  |  |
|    |              |         |           |           |       |    |              | max(1)= | 4 -> 11   | 0.53783   |       |  |  |  |
| 10 | Singlet-?Sym | 18.1234 | 68.41     | 0.0314    | 0.000 |    |              | max(2)= | 3 -> 9    | 0.41629   |       |  |  |  |
|    |              | max(1)= | 4 -> 10   | 0.66525   |       |    |              | max(3)= | 5 -> 11   | 0.10691   |       |  |  |  |
|    |              | max(2)= | 4 -> 7    | 0.12381   |       |    |              | max(4)= | 3 -> 8    | 0.08275   |       |  |  |  |
|    |              | max(3)= | 4 -> 11   | 0.06687   |       |    |              | max(5)= | 3 -> 14   | 0.04214   |       |  |  |  |
|    |              | max(4)= | 4 -> 18   | 0.03270   |       |    |              | min(1)= | 4 -> 6    | -0.07307  |       |  |  |  |
|    |              | max(5)= | 4 -> 15   | 0.03232   |       |    |              | min(2)= | 4 -> 10   | -0.07215  |       |  |  |  |
|    |              | min(1)= | 4 -> 6    | -0.18092  |       |    |              | min(3)= | 4 -> 7    | -0.06087  |       |  |  |  |
|    |              | min(2)= | 4 -> 12   | -0.04824  |       |    |              | min(4)= | 4 -> 15   | -0.03193  |       |  |  |  |
|    |              | min(3)= | 4 -> 19   | -0.00280  |       |    |              | min(5)= | 5 -> 6    | -0.01453  |       |  |  |  |
|    |              | min(4)= | 4 -> 25   | -0.00105  |       |    |              | #CIs=43 | #CIs>0=28 | #CIs<0=15 |       |  |  |  |
|    |              | min(5)= | 5 -> 6    | -0.00103  |       |    |              |         |           |           |       |  |  |  |
|    |              | #CIs=31 | #CIs>0=22 | #CIs<0=9  |       | 14 | Singlet-?Sym | 20.9412 | 59.21     | 0.0439    | 0.000 |  |  |  |
|    |              |         |           |           |       |    |              | max(1)= | 3 -> 9    | 0.47181   |       |  |  |  |
| 11 | Singlet-?Sym | 18.6919 | 66.33     | 0.0039    | 0.000 |    |              | max(2)= | 5 -> 11   | 0.22691   |       |  |  |  |
|    |              | max(1)= | 4 -> 9    | 0.36939   |       |    |              | max(3)= | 4 -> 6    | 0.04261   |       |  |  |  |
|    |              | max(2)= | 5 -> 8    | 0.36939   |       |    |              | max(4)= | 3 -> 14   | 0.04137   |       |  |  |  |
|    |              | max(3)= | 3 -> 7    | 0.30592   |       |    |              | max(5)= | 4 -> 7    | 0.03615   |       |  |  |  |
|    |              | max(4)= | 2 -> 12   | 0.01600   |       |    |              | min(1)= | 4 -> 11   | -0.35287  |       |  |  |  |
|    |              | max(5)= | 4 -> 14   | 0.01134   |       |    |              | min(2)= | 3 -> 8    | -0.30340  |       |  |  |  |
|    |              | min(1)= | 3 -> 6    | -0.28933  |       |    |              | min(3)= | 5 -> 6    | -0.02740  |       |  |  |  |
|    |              | min(2)= | 3 -> 10   | -0.19081  |       |    |              | min(4)= | 3 -> 13   | -0.02660  |       |  |  |  |
|    |              | min(3)= | 3 -> 12   | -0.10075  |       |    |              | min(5)= | 5 -> 7    | -0.02326  |       |  |  |  |
|    |              | min(4)= | 3 -> 15   | -0.04466  |       |    |              | #CIs=44 | #CIs>0=23 | #CIs<0=21 |       |  |  |  |
|    |              | min(5)= | 2 -> 7    | -0.01668  |       |    |              |         |           |           |       |  |  |  |
|    |              | #CIs=31 | #CIs>0=10 | #CIs<0=21 |       | 15 | Singlet-?Sym | 20.9412 | 59.21     | 0.0439    | 0.000 |  |  |  |
|    |              |         |           |           |       |    |              | max(1)= | 3 -> 8    | 0.47181   |       |  |  |  |
| 12 | Singlet-?Sym | 20.7628 | 59.71     | 0.0525    | 0.000 |    |              | max(2)= | 3 -> 9    | 0.30340   |       |  |  |  |
|    |              | max(1)= | 5 -> 11   | 0.53783   |       |    |              | max(3)= | 5 -> 6    | 0.04261   |       |  |  |  |
|    |              | max(2)= | 3 -> 8    | 0.41629   |       |    |              | max(4)= | 3 -> 13   | 0.04137   |       |  |  |  |
|    |              | max(3)= | 3 -> 13   | 0.04214   |       |    |              | max(5)= | 5 -> 7    | 0.03615   |       |  |  |  |
|    |              | max(4)= | 5 -> 12   | 0.02634   |       |    |              | min(1)= | 5 -> 11   | -0.35287  |       |  |  |  |
|    |              | max(5)= | 5 -> 18   | 0.02127   |       |    |              | min(2)= | 4 -> 11   | -0.22691  |       |  |  |  |
|    |              | min(1)= | 4 -> 11   | -0.10691  |       |    |              | min(3)= | 5 -> 12   | -0.01739  |       |  |  |  |
|    |              | min(2)= | 3 -> 9    | -0.08275  |       |    |              | min(4)= | 5 -> 18   | -0.01524  |       |  |  |  |
|    |              | min(3)= | 5 -> 6    | -0.07307  |       |    |              | min(5)= | 4 -> 12   | -0.01119  |       |  |  |  |
|    |              | min(4)= | 5 -> 10   | -0.07215  |       |    |              | #CIs=44 | #CIs>0=27 | #CIs<0=17 |       |  |  |  |

|    |              |         |           |           |       |                             |         |          |        |       |
|----|--------------|---------|-----------|-----------|-------|-----------------------------|---------|----------|--------|-------|
|    |              |         |           |           |       | max(1)=                     | 5 -> 12 | 0.66461  |        |       |
| 16 | Singlet-SG   | 21.1870 | 58.52     | 0.2080    | 0.000 | max(2)=                     | 5 -> 7  | 0.21985  |        |       |
|    |              |         |           |           |       | max(3)=                     | 4 -> 12 | 0.06741  |        |       |
|    |              |         |           |           |       | max(4)=                     | 5 -> 19 | 0.04840  |        |       |
|    |              |         |           |           |       | max(5)=                     | 5 -> 15 | 0.04231  |        |       |
|    |              |         |           |           |       | min(1)=                     | 3 -> 16 | -0.00948 |        |       |
|    |              |         |           |           |       | min(2)=                     | 5 -> 20 | -0.00686 |        |       |
|    |              |         |           |           |       | min(3)=                     | 4 -> 22 | -0.00629 |        |       |
|    |              |         |           |           |       | min(4)=                     | 3 -> 24 | -0.00431 |        |       |
|    |              |         |           |           |       | min(5)=                     | 5 -> 11 | -0.00397 |        |       |
|    |              |         |           |           |       | #CIs=43 #CIs>0=26 #CIs<0=17 |         |          |        |       |
|    |              | #CIs=32 | #CIs>0=20 | #CIs<0=12 | 20    | Singlet-?Sym                | 25.2680 | 49.07    | 0.0272 | 0.000 |
|    |              |         |           |           |       | max(1)=                     | 4 -> 12 | 0.66461  |        |       |
| 17 | Singlet-SG   | 22.1522 | 55.97     | 0.0082    | 0.000 | max(2)=                     | 4 -> 7  | 0.21985  |        |       |
|    |              |         |           |           |       | max(3)=                     | 4 -> 19 | 0.04840  |        |       |
|    |              |         |           |           |       | max(4)=                     | 4 -> 15 | 0.04231  |        |       |
|    |              |         |           |           |       | max(5)=                     | 4 -> 6  | 0.01222  |        |       |
|    |              |         |           |           |       | min(1)=                     | 5 -> 12 | -0.06741 |        |       |
|    |              |         |           |           |       | min(2)=                     | 5 -> 7  | -0.02230 |        |       |
|    |              |         |           |           |       | min(3)=                     | 3 -> 17 | -0.00948 |        |       |
|    |              |         |           |           |       | min(4)=                     | 4 -> 20 | -0.00686 |        |       |
|    |              |         |           |           |       | min(5)=                     | 4 -> 21 | -0.00629 |        |       |
|    |              |         |           |           |       | #CIs=43 #CIs>0=20 #CIs<0=23 |         |          |        |       |
|    |              | #CIs=30 | #CIs>0=13 | #CIs<0=17 | 21    | Singlet-SG                  | 30.4963 | 40.66    | 0.2501 | 0.000 |
|    |              |         |           |           |       | max(1)=                     | 3 -> 12 | 0.67977  |        |       |
| 18 | Singlet-SG   | 24.3185 | 50.98     | 0.0292    | 0.000 | max(2)=                     | 3 -> 7  | 0.09924  |        |       |
|    |              |         |           |           |       | max(3)=                     | 4 -> 9  | 0.06274  |        |       |
|    |              |         |           |           |       | max(4)=                     | 5 -> 8  | 0.06274  |        |       |
|    |              |         |           |           |       | max(5)=                     | 3 -> 10 | 0.03869  |        |       |
|    |              |         |           |           |       | min(1)=                     | 4 -> 14 | -0.08800 |        |       |
|    |              |         |           |           |       | min(2)=                     | 5 -> 13 | -0.08800 |        |       |
|    |              |         |           |           |       | min(3)=                     | 2 -> 10 | -0.01804 |        |       |
|    |              |         |           |           |       | min(4)=                     | 2 -> 18 | -0.01759 |        |       |
|    |              |         |           |           |       | min(5)=                     | 2 -> 6  | -0.01605 |        |       |
|    |              |         |           |           |       | #CIs=32 #CIs>0=15 #CIs<0=17 |         |          |        |       |
|    |              | #CIs=31 | #CIs>0=18 | #CIs<0=13 | 22    | Singlet-SG                  | 38.2279 | 32.43    | 0.0194 | 0.000 |
|    |              |         |           |           |       | max(1)=                     | 2 -> 6  | 0.60203  |        |       |
| 19 | Singlet-?Sym | 25.2680 | 49.07     | 0.0272    | 0.000 | max(2)=                     | 2 -> 7  | 0.32218  |        |       |



|    |              |                             |         |          |       |    |                             |         |          |        |       |
|----|--------------|-----------------------------|---------|----------|-------|----|-----------------------------|---------|----------|--------|-------|
|    |              | min(2)=                     | 4 -> 17 | -0.05619 |       |    | min(4)=                     | 4 -> 20 | -0.01536 |        |       |
|    |              | min(3)=                     | 5 -> 8  | -0.05033 |       |    | min(5)=                     | 5 -> 12 | -0.00196 |        |       |
|    |              | min(4)=                     | 4 -> 27 | -0.01376 |       |    | #CIs=41 #CIs>0=30 #CIs<0=11 |         |          |        |       |
|    |              | min(5)=                     | 4 -> 13 | -0.00494 |       |    |                             |         |          |        |       |
|    |              | #CIs=20 #CIs>0=9 #CIs<0=11  |         |          |       | 32 | Singlet-SG                  | 46.8521 | 26.46    | 0.0025 | 0.000 |
|    |              |                             |         |          |       |    | max(1)=                     | 2 -> 11 | 0.68763  |        |       |
| 29 | Singlet-SG   | 44.3839                     | 27.93   | 0.0107   | 0.000 |    | max(2)=                     | 2 -> 12 | 0.04870  |        |       |
|    |              | max(1)=                     | 2 -> 10 | 0.65724  |       |    | max(3)=                     | 2 -> 18 | 0.02444  |        |       |
|    |              | max(2)=                     | 2 -> 7  | 0.09934  |       |    | max(4)=                     | 3 -> 10 | 0.01646  |        |       |
|    |              | max(3)=                     | 2 -> 11 | 0.06909  |       |    | max(5)=                     | 2 -> 20 | 0.00519  |        |       |
|    |              | max(4)=                     | 3 -> 15 | 0.03702  |       |    | min(1)=                     | 2 -> 10 | -0.09090 |        |       |
|    |              | max(5)=                     | 2 -> 15 | 0.03142  |       |    | min(2)=                     | 2 -> 6  | -0.08807 |        |       |
|    |              | min(1)=                     | 2 -> 6  | -0.15705 |       |    | min(3)=                     | 3 -> 15 | -0.04482 |        |       |
|    |              | min(2)=                     | 4 -> 14 | -0.10467 |       |    | min(4)=                     | 2 -> 7  | -0.03966 |        |       |
|    |              | min(3)=                     | 5 -> 13 | -0.10467 |       |    | min(5)=                     | 2 -> 15 | -0.03861 |        |       |
|    |              | min(4)=                     | 2 -> 12 | -0.05324 |       |    | #CIs=32 #CIs>0=9 #CIs<0=23  |         |          |        |       |
|    |              | min(5)=                     | 3 -> 10 | -0.02027 |       |    |                             |         |          |        |       |
|    |              | #CIs=32 #CIs>0=15 #CIs<0=17 |         |          |       | 33 | Singlet-?Sym                | 47.6919 | 26.00    | 0.0117 | 0.000 |
|    |              |                             |         |          |       |    | max(1)=                     | 3 -> 13 | 0.66569  |        |       |
| 30 | Singlet-?Sym | 45.2872                     | 27.38   | 0.0015   | 0.000 |    | max(2)=                     | 3 -> 14 | 0.19729  |        |       |
|    |              | max(1)=                     | 5 -> 15 | 0.69676  |       |    | max(3)=                     | 3 -> 16 | 0.09241  |        |       |
|    |              | max(2)=                     | 5 -> 11 | 0.03763  |       |    | max(4)=                     | 5 -> 15 | 0.04525  |        |       |
|    |              | max(3)=                     | 2 -> 8  | 0.03419  |       |    | max(5)=                     | 3 -> 17 | 0.02739  |        |       |
|    |              | max(4)=                     | 5 -> 18 | 0.02796  |       |    | min(1)=                     | 3 -> 8  | -0.06443 |        |       |
|    |              | max(5)=                     | 5 -> 7  | 0.02605  |       |    | min(2)=                     | 3 -> 9  | -0.01909 |        |       |
|    |              | min(1)=                     | 5 -> 12 | -0.05371 |       |    | min(3)=                     | 5 -> 21 | -0.00675 |        |       |
|    |              | min(2)=                     | 3 -> 13 | -0.05278 |       |    | min(4)=                     | 5 -> 12 | -0.00616 |        |       |
|    |              | min(3)=                     | 5 -> 10 | -0.04635 |       |    | min(5)=                     | 2 -> 24 | -0.00571 |        |       |
|    |              | min(4)=                     | 4 -> 15 | -0.02539 |       |    | #CIs=43 #CIs>0=28 #CIs<0=15 |         |          |        |       |
|    |              | min(5)=                     | 5 -> 20 | -0.01536 |       |    |                             |         |          |        |       |
|    |              | #CIs=41 #CIs>0=20 #CIs<0=21 |         |          |       | 34 | Singlet-?Sym                | 47.6919 | 26.00    | 0.0117 | 0.000 |
|    |              |                             |         |          |       |    | max(1)=                     | 3 -> 14 | 0.66569  |        |       |
| 31 | Singlet-?Sym | 45.2872                     | 27.38   | 0.0015   | 0.000 |    | max(2)=                     | 3 -> 17 | 0.09241  |        |       |
|    |              | max(1)=                     | 4 -> 15 | 0.69676  |       |    | max(3)=                     | 4 -> 15 | 0.04525  |        |       |
|    |              | max(2)=                     | 4 -> 11 | 0.03763  |       |    | max(4)=                     | 2 -> 17 | 0.02205  |        |       |
|    |              | max(3)=                     | 2 -> 9  | 0.03419  |       |    | max(5)=                     | 4 -> 18 | 0.02129  |        |       |
|    |              | max(4)=                     | 4 -> 18 | 0.02796  |       |    | min(1)=                     | 3 -> 13 | -0.19729 |        |       |
|    |              | max(5)=                     | 4 -> 7  | 0.02605  |       |    | min(2)=                     | 3 -> 9  | -0.06443 |        |       |
|    |              | min(1)=                     | 4 -> 12 | -0.05371 |       |    | min(3)=                     | 3 -> 16 | -0.02739 |        |       |
|    |              | min(2)=                     | 3 -> 14 | -0.05278 |       |    | min(4)=                     | 5 -> 15 | -0.01341 |        |       |
|    |              | min(3)=                     | 4 -> 10 | -0.04635 |       |    | min(5)=                     | 2 -> 16 | -0.00653 |        |       |

|    |              |                             |         |          |              |                             |         |          |       |
|----|--------------|-----------------------------|---------|----------|--------------|-----------------------------|---------|----------|-------|
|    |              | #CIs=43 #CIs>0=24 #CIs<0=19 |         | 38       | Singlet-?Sym | 49.0153                     | 25.29   | 0.0000   | 0.000 |
|    |              |                             |         |          | max(1)=      | 5 -> 17                     |         | 0.49598  |       |
| 35 | Singlet-SG   | 47.7102                     | 25.99   | 0.1516   | 0.000        | max(2)=                     | 4 -> 13 | 0.06044  |       |
|    |              | max(1)=                     | 3 -> 15 | 0.52662  |              | max(3)=                     | 5 -> 23 | 0.01545  |       |
|    |              | max(2)=                     | 3 -> 19 | 0.03383  |              | max(4)=                     | 4 -> 8  | 0.00967  |       |
|    |              | max(3)=                     | 3 -> 7  | 0.03330  |              | max(5)=                     | 5 -> 27 | 0.00377  |       |
|    |              | max(4)=                     | 3 -> 11 | 0.03280  |              | min(1)=                     | 4 -> 16 | -0.49598 |       |
|    |              | max(5)=                     | 3 -> 18 | 0.02923  |              | min(2)=                     | 5 -> 14 | -0.06044 |       |
|    |              | min(1)=                     | 4 -> 14 | -0.28466 |              | min(3)=                     | 4 -> 24 | -0.01545 |       |
|    |              | min(2)=                     | 5 -> 13 | -0.28466 |              | min(4)=                     | 5 -> 9  | -0.00967 |       |
|    |              | min(3)=                     | 2 -> 10 | -0.12197 |              | min(5)=                     | 4 -> 26 | -0.00377 |       |
|    |              | min(4)=                     | 4 -> 17 | -0.09935 |              |                             |         |          |       |
|    |              | min(5)=                     | 5 -> 16 | -0.09935 |              | #CIs=10 #CIs>0=5 #CIs<0=5   |         |          |       |
|    |              | #CIs=33 #CIs>0=14 #CIs<0=19 |         | 39       | Singlet-?Sym | 50.6494                     | 24.48   | 0.9291   | 0.000 |
|    |              |                             |         |          | max(1)=      | 4 -> 17                     |         | 0.40917  |       |
| 36 | Singlet-?Sym | 48.9219                     | 25.34   | 0.0000   | 0.000        | max(2)=                     | 5 -> 16 | 0.40917  |       |
|    |              | max(1)=                     | 4 -> 16 | 0.49637  |              | max(3)=                     | 2 -> 12 | 0.28695  |       |
|    |              | max(2)=                     | 5 -> 17 | 0.49637  |              | max(4)=                     | 2 -> 7  | 0.12930  |       |
|    |              | max(3)=                     | 4 -> 24 | 0.01447  |              | max(5)=                     | 3 -> 19 | 0.05461  |       |
|    |              | max(4)=                     | 5 -> 23 | 0.01447  |              | min(1)=                     | 4 -> 14 | -0.16281 |       |
|    |              | max(5)=                     | 4 -> 26 | 0.00335  |              | min(2)=                     | 5 -> 13 | -0.16281 |       |
|    |              | min(1)=                     | 4 -> 13 | -0.05743 |              | min(3)=                     | 3 -> 12 | -0.06142 |       |
|    |              | min(2)=                     | 5 -> 14 | -0.05743 |              | min(4)=                     | 2 -> 10 | -0.04661 |       |
|    |              | min(3)=                     | 4 -> 8  | -0.00963 |              | min(5)=                     | 2 -> 11 | -0.02511 |       |
|    |              | min(4)=                     | 5 -> 9  | -0.00963 |              | #CIs=32 #CIs>0=17 #CIs<0=15 |         |          |       |
|    |              | min(5)=                     | 3 -> 22 | -0.00082 |              |                             |         |          |       |
|    |              | #CIs=12 #CIs>0=6 #CIs<0=6   |         | 40       | Singlet-SG   | 51.3252                     | 24.16   | 0.0531   | 0.000 |
|    |              |                             |         |          | max(1)=      | 2 -> 12                     |         | 0.58096  |       |
| 37 | Singlet-?Sym | 48.9219                     | 25.34   | 0.0000   | 0.000        | max(2)=                     | 3 -> 15 | 0.18145  |       |
|    |              | max(1)=                     | 5 -> 16 | 0.49637  |              | max(3)=                     | 2 -> 7  | 0.17257  |       |
|    |              | max(2)=                     | 4 -> 14 | 0.05743  |              | max(4)=                     | 4 -> 14 | 0.10663  |       |
|    |              | max(3)=                     | 5 -> 24 | 0.01447  |              | max(5)=                     | 5 -> 13 | 0.10663  |       |
|    |              | max(4)=                     | 4 -> 9  | 0.00963  |              | min(1)=                     | 4 -> 17 | -0.18363 |       |
|    |              | max(5)=                     | 5 -> 26 | 0.00335  |              | min(2)=                     | 5 -> 16 | -0.18363 |       |
|    |              | min(1)=                     | 4 -> 17 | -0.49637 |              | min(3)=                     | 3 -> 19 | -0.02596 |       |
|    |              | min(2)=                     | 5 -> 13 | -0.05743 |              | min(4)=                     | 3 -> 18 | -0.02488 |       |
|    |              | min(3)=                     | 4 -> 23 | -0.01447 |              | min(5)=                     | 2 -> 18 | -0.01056 |       |
|    |              | min(4)=                     | 5 -> 8  | -0.00963 |              | #CIs=32 #CIs>0=21 #CIs<0=11 |         |          |       |
|    |              | min(5)=                     | 4 -> 27 | -0.00335 |              |                             |         |          |       |
|    |              | #CIs=12 #CIs>0=7 #CIs<0=5   |         | 41       | Singlet-?Sym | 53.2054                     | 23.30   | 0.4536   | 0.000 |
|    |              |                             |         |          | max(1)=      | 3 -> 16                     |         | 0.54376  |       |

|         |         |          |                             |         |          |
|---------|---------|----------|-----------------------------|---------|----------|
| max(2)= | 3 -> 17 | 0.43157  | min(2)=                     | 3 -> 14 | -0.05651 |
| max(3)= | 2 -> 13 | 0.03149  | min(3)=                     | 5 -> 18 | -0.04060 |
| max(4)= | 2 -> 14 | 0.02499  | min(4)=                     | 2 -> 8  | -0.03482 |
| max(5)= | 5 -> 21 | 0.01432  | min(5)=                     | 4 -> 18 | -0.03222 |
| min(1)= | 3 -> 13 | -0.07121 | #CIs=44 #CIs>0=19 #CIs<0=25 |         |          |

# 6 HCl

## 6.1 6-311G(d,p)

### 6.1.1 Plots

Figure S7: For HCl molecule and 6-311G(d,p) basis set, variation of  $\alpha_{ZZ}$  (top) and  $\beta_{ZZZ}$  (bottom) with respect to the number of orbitals (FIOs decomposition presented in this work, in Plots S7a and S7c) or states (SOS approaches, in Plots S7b and S7d). For  $\alpha$  FIOs, three approaches were considered: CPKS (CAM-B3LYP), CPHF and UPHF. For  $\beta$  FIOs, the results of CPKS and CPHF approaches are provided. All elements of the  $\beta$  tensor were recomputed with an error less than 0.01 au in the case of the FIOs. For SOS approach, TDDFT (CAM-B3LYP) and CIS methods were employed. Recomputed values of  $\alpha_{ZZ}$  and  $\beta_{ZZZ}$  for the different approaches are included in each plot. HOMO (H) and LUMO (L) are represented by blue and pink dotted lines, respectively.

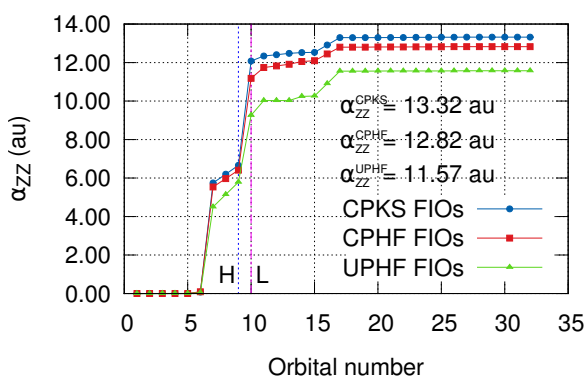

(a) CPKS-, CPHF- and UPHF-FIOs decomposition of  $\alpha_{ZZ}$  into MOs.

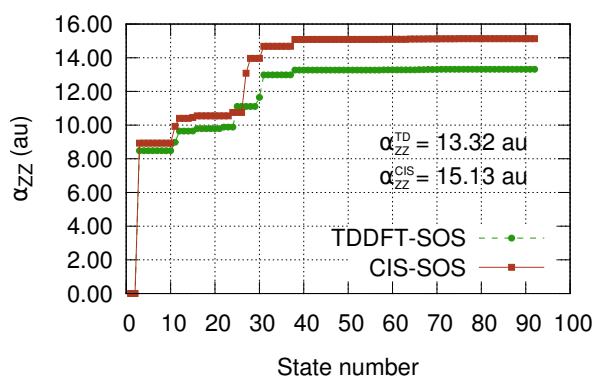

(b) TDDFT- and CIS-SOS decomposition of  $\alpha_{ZZ}$  into states.

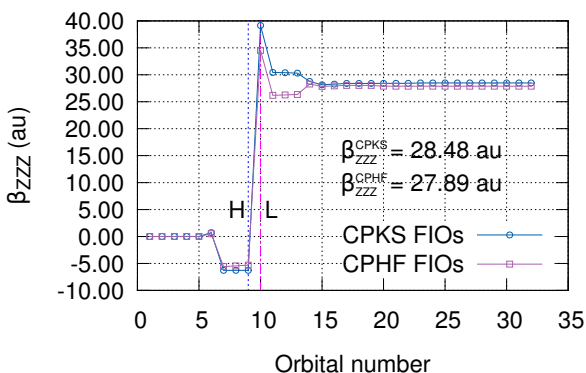

(c) CPKS- and CPHF-FIOs decomposition of  $\beta_{ZZZ}$  into MOs.

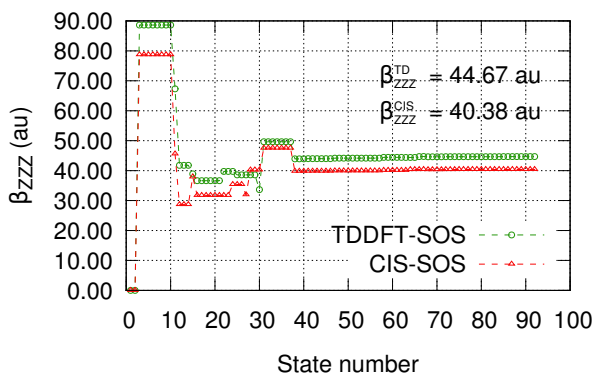

(d) TDDFT- and CIS-SOS decomposition of  $\beta_{ZZZ}$  into states.



## 6.2 6-311++G(d,p)

### 6.2.1 Plots

Figure S8: For HCl molecule and 6-311++G(d,p) basis set, variation of  $\alpha_{ZZ}$  (top) and  $\beta_{ZZZ}$  (bottom) with respect to the number of orbitals (FIOs decomposition presented in this work, in Plots S8a and S8c) or states (SOS approaches, in Plots S8b and S8d). For  $\alpha$  FIOs, three approaches were considered: CPKS (CAM-B3LYP), CPHF and UPHF. For  $\beta$  FIOs, the results of CPKS and CPHF approaches are provided. All elements of the  $\beta$  tensor were recomputed with an error less than 0.06 au in the case of the FIOs. For SOS approach, TDDFT (CAM-B3LYP) and CIS methods were employed. Recomputed values of  $\alpha_{ZZ}$  and  $\beta_{ZZZ}$  for the different approaches are included in each plot. HOMO (H) and LUMO (L) are represented by blue and pink dotted lines, respectively.

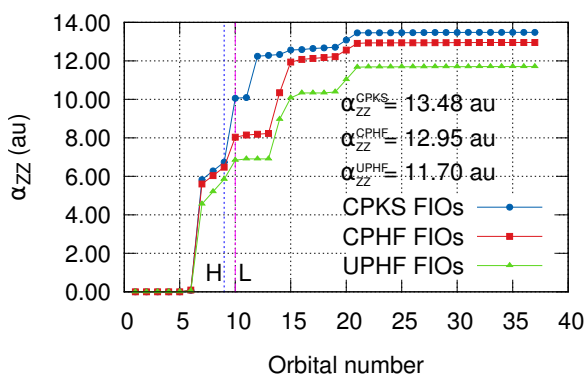

(a) CPKS-, CPHF- and UPHF-FIOs decomposition of  $\alpha_{ZZ}$  into MOs.

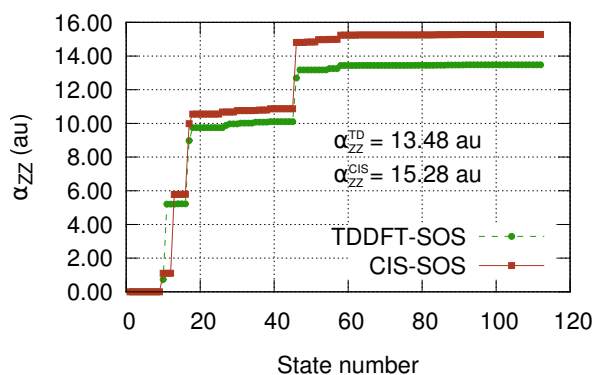

(b) TDDFT- and CIS-SOS decomposition of  $\alpha_{ZZ}$  into states.

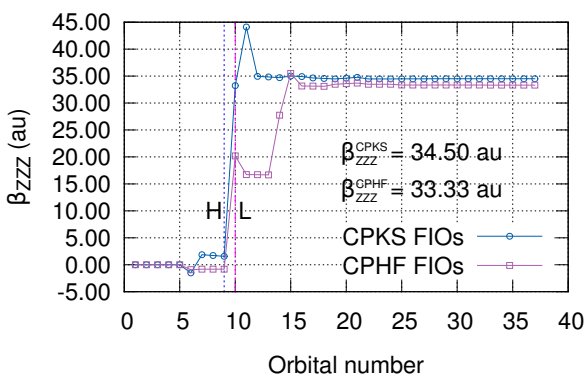

(c) CPKS- and CPHF-FIOs decomposition of  $\beta_{ZZZ}$  into MOs.

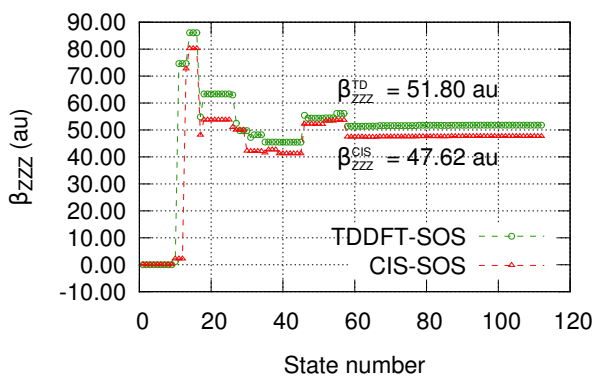

(d) TDDFT- and CIS-SOS decomposition of  $\beta_{ZZZ}$  into states.

# 7 H<sub>2</sub>O

## 7.1 6-311G(d,p)

### 7.1.1 Plots

Figure S9: For H<sub>2</sub>O molecule and 6-311G(d,p) basis set, variation of  $\alpha_{ZZ}$  (top) and  $\beta_{ZZZ}$  (bottom) with respect to the number of orbitals (FIOs decomposition presented in this work, in Plots S9a and S9c) or states (SOS approaches, in Plots S9b and S9d). For  $\alpha$  FIOs, three approaches were considered: CPKS (CAM-B3LYP), CPHF and UPHF. For  $\beta$  FIOs, the results of CPKS and CPHF approaches are provided. All elements of the  $\beta$  tensor were recomputed with an error less than 0.02 au in the case of the FIOs. For SOS approach, TDDFT (CAM-B3LYP) and CIS methods were employed. Recomputed values of  $\alpha_{ZZ}$  and  $\beta_{ZZZ}$  for the different approaches are included in each plot. HOMO (H) and LUMO (L) are represented by blue and pink dotted lines, respectively.

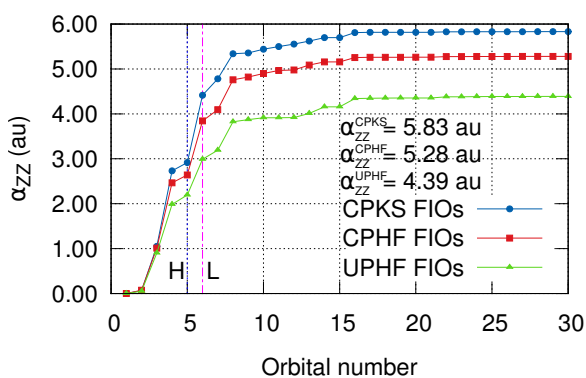

(a) CPKS-, CPHF- and UPHF-FIOs decomposition of  $\alpha_{ZZ}$  into MOs.

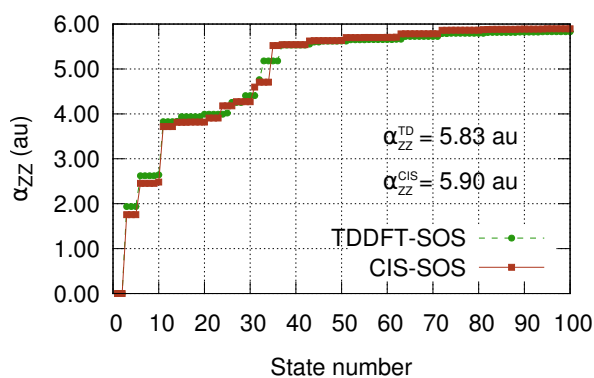

(b) TDDFT- and CIS-SOS decomposition of  $\alpha_{ZZ}$  into states.

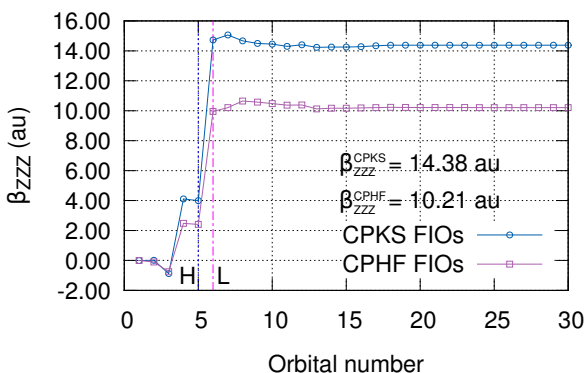

(c) CPKS- and CPHF-FIOs decomposition of  $\beta_{ZZZ}$  into MOs.

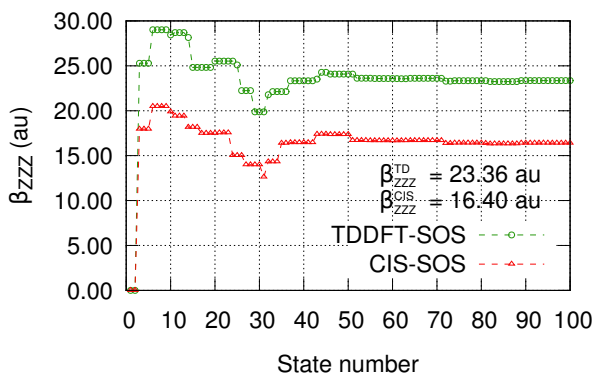

(d) TDDFT- and CIS-SOS decomposition of  $\beta_{ZZZ}$  into states.

## 7.1.2 Main contributions from different excited states at TDDFT (CAM-B3LYP) approach

| #_exc.st | ___symm___ | Exc.E  | Osc._Strength | ___f___     | _ <s**2>_</s**2> | min(4)=    | 5 -> 11      | -0.02154     |        |       |
|----------|------------|--------|---------------|-------------|------------------|------------|--------------|--------------|--------|-------|
| 1        | Singlet-B1 | 7.4450 | 166.53        | 0.0265      | 0.000            | min(5)=    | 4 -> 13      | -0.01319     |        |       |
|          |            |        |               |             |                  | #states=32 | #states>0=13 | #states<0=19 |        |       |
|          | max(1)=    |        | 5 -> 6        | 0.70615     |                  |            |              |              |        |       |
|          | max(2)=    |        | 5 -> 10       | 0.01679     | 4                | Singlet-B2 | 11.7572      | 105.45       | 0.0493 | 0.000 |
|          | max(3)=    |        | 2 -> 11       | 0.00495     |                  | max(1)=    | 4 -> 7       | 0.70420      |        |       |
|          | max(4)=    |        | 5 -> 25       | 0.00396     |                  | max(2)=    | 4 -> 12      | 0.03096      |        |       |
|          | max(5)=    |        | 2 -> 22       | 0.00187     |                  | max(3)=    | 3 -> 9       | 0.02523      |        |       |
|          | min(1)=    |        | 5 -> 9        | -0.03581    |                  | max(4)=    | 4 -> 8       | 0.02167      |        |       |
|          | min(2)=    |        | 5 -> 13       | -0.00974    |                  | max(5)=    | 5 -> 15      | 0.00949      |        |       |
|          | min(3)=    |        | 3 -> 23       | -0.00333    |                  | min(1)=    | 3 -> 6       | -0.04529     |        |       |
|          | min(4)=    |        | 5 -> 14       | -0.00314    |                  | min(2)=    | 2 -> 7       | -0.01200     |        |       |
|          | min(5)=    |        | 4 -> 22       | -0.00306    |                  | min(3)=    | 2 -> 8       | -0.00448     |        |       |
|          | #states=21 |        | #states>0=12  | #states<0=9 |                  | min(4)=    | 3 -> 13      | -0.00342     |        |       |
|          |            |        |               |             |                  | min(5)=    | 3 -> 19      | -0.00315     |        |       |
| 2        | Singlet-A2 | 9.3956 | 131.96        | 0.0000      | 0.000            | #states=28 | #states>0=15 | #states<0=13 |        |       |
|          | max(1)=    |        | 5 -> 7        | 0.70282     |                  |            |              |              |        |       |
|          | max(2)=    |        | 5 -> 8        | 0.07139     | 5                | Singlet-B2 | 13.6671      | 90.72        | 0.2301 | 0.000 |
|          | max(3)=    |        | 5 -> 12       | 0.03137     |                  | max(1)=    | 3 -> 6       | 0.70410      |        |       |
|          | max(4)=    |        | 2 -> 15       | 0.00328     |                  | max(2)=    | 4 -> 7       | 0.04683      |        |       |
|          | max(5)=    |        | 5 -> 21       | 0.00186     |                  | max(3)=    | 3 -> 10      | 0.01555      |        |       |
|          | min(1)=    |        | 3 -> 11       | -0.00287    |                  | max(4)=    | 2 -> 8       | 0.00900      |        |       |
|          | min(2)=    |        | 5 -> 18       | -0.00189    |                  | max(5)=    | 2 -> 12      | 0.00728      |        |       |
|          | min(3)=    |        | 4 -> 15       | 0.00005     |                  | min(1)=    | 4 -> 8       | -0.04276     |        |       |
|          | min(4)=    |        | 3 -> 22       | 0.00023     |                  | min(2)=    | 3 -> 9       | -0.00787     |        |       |
|          | min(5)=    |        | 3 -> 27       | 0.00029     |                  | min(3)=    | 3 -> 13      | -0.00786     |        |       |
|          | #states=16 |        | #states>0=14  | #states<0=2 |                  | min(4)=    | 2 -> 7       | -0.00427     |        |       |
|          |            |        |               |             |                  | min(5)=    | 3 -> 20      | -0.00268     |        |       |
| 3        | Singlet-A1 | 9.7608 | 127.02        | 0.0831      | 0.000            | #states=28 | #states>0=14 | #states<0=14 |        |       |
|          | max(1)=    |        | 4 -> 6        | 0.70407     |                  |            |              |              |        |       |
|          | max(2)=    |        | 2 -> 6        | 0.01169     | 6                | Singlet-A1 | 16.4798      | 75.23        | 0.0836 | 0.000 |
|          | max(3)=    |        | 2 -> 10       | 0.00301     |                  | max(1)=    | 3 -> 7       | 0.69406      |        |       |
|          | max(4)=    |        | 2 -> 19       | 0.00177     |                  | max(2)=    | 4 -> 9       | 0.07754      |        |       |
|          | max(5)=    |        | 2 -> 24       | 0.00141     |                  | max(3)=    | 4 -> 6       | 0.05067      |        |       |
|          | min(1)=    |        | 3 -> 7        | -0.05111    |                  | max(4)=    | 2 -> 6       | 0.02311      |        |       |
|          | min(2)=    |        | 3 -> 8        | -0.02584    |                  | max(5)=    | 2 -> 10      | 0.00505      |        |       |
|          | min(3)=    |        | 4 -> 9        | -0.02436    |                  | min(1)=    | 5 -> 11      | -0.08145     |        |       |

|   |            |                                      |         |          |       |  |                                      |                                      |          |          |       |  |
|---|------------|--------------------------------------|---------|----------|-------|--|--------------------------------------|--------------------------------------|----------|----------|-------|--|
|   |            | min(2)=                              | 4 -> 10 | -0.05991 |       |  |                                      | min(4)=                              | 3 -> 19  | -0.01154 |       |  |
|   |            | min(3)=                              | 2 -> 13 | -0.01796 |       |  |                                      | min(5)=                              | 2 -> 12  | -0.00636 |       |  |
|   |            | min(4)=                              | 2 -> 9  | -0.01170 |       |  |                                      | #states=29 #states>0=16 #states<0=13 |          |          |       |  |
|   |            | min(5)=                              | 4 -> 14 | -0.00820 |       |  |                                      |                                      |          |          |       |  |
|   |            | #states=32 #states>0=13 #states<0=19 |         |          | 10    |  | Singlet-A1                           | 20.1903                              | 61.41    | 0.0037   | 0.000 |  |
|   |            |                                      |         |          |       |  | max(1)=                              | 4 -> 9                               | 0.69335  |          |       |  |
| 7 | Singlet-A2 | 16.4823                              | 75.22   | 0.0000   | 0.000 |  | max(2)=                              | 3 -> 8                               | 0.09678  |          |       |  |
|   |            | max(1)=                              | 5 -> 8  | 0.70335  |       |  | max(3)=                              | 5 -> 11                              | 0.04687  |          |       |  |
|   |            | max(2)=                              | 5 -> 17 | 0.00551  |       |  | max(4)=                              | 4 -> 6                               | 0.02446  |          |       |  |
|   |            | max(3)=                              | 2 -> 15 | 0.00402  |       |  | max(5)=                              | 4 -> 10                              | 0.02086  |          |       |  |
|   |            | max(4)=                              | 3 -> 16 | 0.00152  |       |  | min(1)=                              | 3 -> 7                               | -0.07088 |          |       |  |
|   |            | max(5)=                              | 4 -> 23 | 0.00146  |       |  | min(2)=                              | 2 -> 6                               | -0.03485 |          |       |  |
|   |            | min(1)=                              | 5 -> 7  | -0.07148 |       |  | min(3)=                              | 4 -> 19                              | -0.00907 |          |       |  |
|   |            | min(2)=                              | 5 -> 18 | -0.01292 |       |  | min(4)=                              | 3 -> 18                              | -0.00638 |          |       |  |
|   |            | min(3)=                              | 3 -> 11 | -0.00279 |       |  | min(5)=                              | 2 -> 10                              | -0.00439 |          |       |  |
|   |            | min(4)=                              | 5 -> 21 | 0.00007  |       |  | #states=33 #states>0=18 #states<0=15 |                                      |          |          |       |  |
|   |            | min(5)=                              | 5 -> 12 | 0.00027  |       |  |                                      |                                      |          |          |       |  |
|   |            | #states=16 #states>0=13 #states<0=3  |         |          | 11    |  | Singlet-A1                           | 24.0479                              | 51.56    | 0.3084   | 0.000 |  |
|   |            |                                      |         |          |       |  | max(1)=                              | 3 -> 8                               | 0.68778  |          |       |  |
| 8 | Singlet-B1 | 18.2693                              | 67.86   | 0.1098   | 0.000 |  | max(2)=                              | 2 -> 6                               | 0.02708  |          |       |  |
|   |            | max(1)=                              | 5 -> 9  | 0.70462  |       |  | max(3)=                              | 4 -> 13                              | 0.02354  |          |       |  |
|   |            | max(2)=                              | 5 -> 6  | 0.03664  |       |  | max(4)=                              | 4 -> 6                               | 0.01822  |          |       |  |
|   |            | max(3)=                              | 3 -> 15 | 0.01952  |       |  | max(5)=                              | 5 -> 22                              | 0.00870  |          |       |  |
|   |            | max(4)=                              | 5 -> 14 | 0.01511  |       |  | min(1)=                              | 5 -> 11                              | -0.10529 |          |       |  |
|   |            | max(5)=                              | 4 -> 22 | 0.00784  |       |  | min(2)=                              | 4 -> 9                               | -0.08643 |          |       |  |
|   |            | min(1)=                              | 5 -> 10 | -0.03669 |       |  | min(3)=                              | 4 -> 10                              | -0.06761 |          |       |  |
|   |            | min(2)=                              | 4 -> 16 | -0.01422 |       |  | min(4)=                              | 4 -> 14                              | -0.04153 |          |       |  |
|   |            | min(3)=                              | 2 -> 11 | -0.01195 |       |  | min(5)=                              | 5 -> 16                              | -0.03280 |          |       |  |
|   |            | min(4)=                              | 4 -> 11 | -0.00983 |       |  | #states=34 #states>0=17 #states<0=17 |                                      |          |          |       |  |
|   |            | min(5)=                              | 5 -> 25 | -0.00862 |       |  |                                      |                                      |          |          |       |  |
|   |            | #states=21 #states>0=10 #states<0=11 |         |          | 12    |  | Singlet-B2                           | 25.3359                              | 48.94    | 0.4482   | 0.000 |  |
|   |            |                                      |         |          |       |  | max(1)=                              | 3 -> 9                               | 0.68990  |          |       |  |
| 9 | Singlet-B2 | 19.5924                              | 63.28   | 0.1626   | 0.000 |  | max(2)=                              | 2 -> 7                               | 0.02512  |          |       |  |
|   |            | max(1)=                              | 4 -> 8  | 0.69023  |       |  | max(3)=                              | 2 -> 18                              | 0.01090  |          |       |  |
|   |            | max(2)=                              | 3 -> 9  | 0.13979  |       |  | max(4)=                              | 4 -> 17                              | 0.01027  |          |       |  |
|   |            | max(3)=                              | 3 -> 6  | 0.04498  |       |  | max(5)=                              | 3 -> 19                              | 0.00553  |          |       |  |
|   |            | max(4)=                              | 5 -> 15 | 0.02937  |       |  | min(1)=                              | 4 -> 8                               | -0.13780 |          |       |  |
|   |            | max(5)=                              | 3 -> 14 | 0.01653  |       |  | min(2)=                              | 5 -> 15                              | -0.05403 |          |       |  |
|   |            | min(1)=                              | 2 -> 7  | -0.02841 |       |  | min(3)=                              | 3 -> 10                              | -0.03554 |          |       |  |
|   |            | min(2)=                              | 4 -> 7  | -0.02381 |       |  | min(4)=                              | 3 -> 14                              | -0.02565 |          |       |  |
|   |            | min(3)=                              | 3 -> 13 | -0.01183 |       |  | min(5)=                              | 4 -> 7                               | -0.01947 |          |       |  |

|    |            |            |              |              |       |            |         |            |              |              |
|----|------------|------------|--------------|--------------|-------|------------|---------|------------|--------------|--------------|
|    |            | #states=29 | #states>0=11 | #states<0=18 | 16    | Singlet-B1 | 28.5426 | 43.44      | 0.0004       | 0.000        |
|    |            |            |              |              |       | max(1)=    | 4 -> 11 |            | 0.70385      |              |
| 13 | Singlet-B1 | 26.3281    | 47.09        | 0.0043       | 0.000 | max(2)=    | 5 -> 10 |            | 0.06474      |              |
|    |            | max(1)=    | 5 -> 10      | 0.70251      |       | max(3)=    | 5 -> 9  |            | 0.01298      |              |
|    |            | max(2)=    | 5 -> 9       | 0.03551      |       | max(4)=    | 3 -> 15 |            | 0.00754      |              |
|    |            | max(3)=    | 5 -> 14      | 0.01435      |       | max(5)=    | 4 -> 22 |            | 0.00601      |              |
|    |            | max(4)=    | 5 -> 13      | 0.01142      |       | min(1)=    | 2 -> 11 |            | -0.00748     |              |
|    |            | max(5)=    | 3 -> 15      | 0.01069      |       | min(2)=    | 5 -> 13 |            | -0.00654     |              |
|    |            | min(1)=    | 4 -> 11      | -0.06565     |       | min(3)=    | 4 -> 16 |            | -0.00487     |              |
|    |            | min(2)=    | 5 -> 6       | -0.01448     |       | min(4)=    | 5 -> 20 |            | -0.00393     |              |
|    |            | min(3)=    | 4 -> 16      | -0.01123     |       | min(5)=    | 5 -> 25 |            | -0.00340     |              |
|    |            | min(4)=    | 2 -> 11      | -0.00628     |       |            |         | #states=21 | #states>0=12 | #states<0=9  |
|    |            | min(5)=    | 5 -> 20      | -0.00469     |       |            |         |            |              |              |
|    |            | #states=21 | #states>0=13 | #states<0=8  | 17    | Singlet-A2 | 29.1471 | 42.54      | 0.0000       | 0.000        |
|    |            |            |              |              |       | max(1)=    | 5 -> 12 |            | 0.70607      |              |
| 14 | Singlet-A1 | 26.8026    | 46.26        | 0.0023       | 0.000 | max(2)=    | 5 -> 26 |            | 0.00594      |              |
|    |            | max(1)=    | 2 -> 6       | 0.55788      |       | max(3)=    | 5 -> 29 |            | 0.00309      |              |
|    |            | max(2)=    | 5 -> 11      | 0.40820      |       | max(4)=    | 4 -> 15 |            | 0.00279      |              |
|    |            | max(3)=    | 3 -> 8       | 0.02606      |       | max(5)=    | 5 -> 21 |            | 0.00213      |              |
|    |            | max(4)=    | 3 -> 7       | 0.01543      |       | min(1)=    | 5 -> 7  |            | -0.03122     |              |
|    |            | max(5)=    | 5 -> 22      | 0.00590      |       | min(2)=    | 3 -> 11 |            | -0.01859     |              |
|    |            | min(1)=    | 4 -> 10      | -0.14000     |       | min(3)=    | 5 -> 18 |            | -0.00901     |              |
|    |            | min(2)=    | 2 -> 9       | -0.03125     |       | min(4)=    | 5 -> 8  |            | -0.00368     |              |
|    |            | min(3)=    | 4 -> 14      | -0.01544     |       | min(5)=    | 3 -> 16 |            | -0.00133     |              |
|    |            | min(4)=    | 2 -> 13      | -0.01275     |       |            |         | #states=15 | #states>0=8  | #states<0=7  |
|    |            | min(5)=    | 4 -> 13      | -0.01143     |       |            |         |            |              |              |
|    |            | #states=34 | #states>0=19 | #states<0=15 | 18    | Singlet-B2 | 29.1639 | 42.51      | 0.0249       | 0.000        |
|    |            |            |              |              |       | max(1)=    | 2 -> 7  |            | 0.70262      |              |
| 15 | Singlet-A1 | 27.7605    | 44.66        | 0.0361       | 0.000 | max(2)=    | 2 -> 8  |            | 0.04474      |              |
|    |            | max(1)=    | 4 -> 10      | 0.45111      |       | max(3)=    | 4 -> 8  |            | 0.03021      |              |
|    |            | max(2)=    | 2 -> 6       | 0.38926      |       | max(4)=    | 5 -> 15 |            | 0.02864      |              |
|    |            | max(3)=    | 3 -> 12      | 0.05436      |       | max(5)=    | 3 -> 10 |            | 0.02379      |              |
|    |            | max(4)=    | 4 -> 9       | 0.03237      |       | min(1)=    | 3 -> 13 |            | -0.03709     |              |
|    |            | max(5)=    | 2 -> 9       | 0.01766      |       | min(2)=    | 3 -> 9  |            | -0.01426     |              |
|    |            | min(1)=    | 5 -> 11      | -0.37344     |       | min(3)=    | 3 -> 24 |            | -0.00479     |              |
|    |            | min(2)=    | 3 -> 8       | -0.02482     |       | min(4)=    | 3 -> 19 |            | -0.00293     |              |
|    |            | min(3)=    | 3 -> 7       | -0.02093     |       | min(5)=    | 4 -> 21 |            | -0.00257     |              |
|    |            | min(4)=    | 4 -> 6       | -0.01708     |       |            |         | #states=29 | #states>0=19 | #states<0=10 |
|    |            | min(5)=    | 4 -> 14      | -0.01236     |       |            |         |            |              |              |
|    |            | #states=33 | #states>0=19 | #states<0=14 | 19    | Singlet-B2 | 31.2720 | 39.65      | 0.0552       | 0.000        |
|    |            |            |              |              |       | max(1)=    | 4 -> 12 |            | 0.70364      |              |

|    |            |                                      |         |          |       |                                      |         |          |        |
|----|------------|--------------------------------------|---------|----------|-------|--------------------------------------|---------|----------|--------|
|    |            | max(2)=                              | 3 -> 9  | 0.00621  |       | max(4)=                              | 3 -> 19 | 0.00651  |        |
|    |            | max(3)=                              | 4 -> 26 | 0.00557  |       | max(5)=                              | 2 -> 12 | 0.00643  |        |
|    |            | max(4)=                              | 4 -> 21 | 0.00257  |       | min(1)=                              | 2 -> 8  | -0.04556 |        |
|    |            | max(5)=                              | 4 -> 29 | 0.00248  |       | min(2)=                              | 5 -> 15 | -0.02289 |        |
|    |            | min(1)=                              | 3 -> 10 | -0.05643 |       | min(3)=                              | 2 -> 7  | -0.01922 |        |
|    |            | min(2)=                              | 4 -> 7  | -0.03140 |       | min(4)=                              | 3 -> 6  | -0.01537 |        |
|    |            | min(3)=                              | 2 -> 8  | -0.02077 |       | min(5)=                              | 4 -> 8  | -0.00929 |        |
|    |            | min(4)=                              | 4 -> 18 | -0.00909 |       | #states=28 #states>0=13 #states<0=15 |         |          |        |
|    |            | min(5)=                              | 3 -> 13 | -0.00785 |       |                                      |         |          |        |
|    |            | #states=29 #states>0=12 #states<0=17 |         | 23       |       | Singlet-B1                           | 35.3546 | 35.07    | 0.2780 |
|    |            |                                      |         |          |       |                                      |         |          | 0.000  |
| 20 | Singlet-A1 | 32.2158                              | 38.49   | 0.0254   | 0.000 | max(1)=                              | 5 -> 13 | 0.70377  |        |
|    |            | max(1)=                              | 4 -> 10 | 0.44285  |       | max(2)=                              | 4 -> 16 | 0.01793  |        |
|    |            | max(2)=                              | 5 -> 11 | 0.31756  |       | max(3)=                              | 5 -> 6  | 0.00925  |        |
|    |            | max(3)=                              | 3 -> 8  | 0.08835  |       | max(4)=                              | 4 -> 11 | 0.00800  |        |
|    |            | max(4)=                              | 3 -> 7  | 0.08007  |       | max(5)=                              | 5 -> 20 | 0.00343  |        |
|    |            | max(5)=                              | 3 -> 18 | 0.01510  |       | min(1)=                              | 5 -> 14 | -0.05491 |        |
|    |            | min(1)=                              | 3 -> 12 | -0.38580 |       | min(2)=                              | 3 -> 15 | -0.02904 |        |
|    |            | min(2)=                              | 2 -> 6  | -0.14060 |       | min(3)=                              | 2 -> 11 | -0.01841 |        |
|    |            | min(3)=                              | 2 -> 9  | -0.10601 |       | min(4)=                              | 5 -> 10 | -0.00858 |        |
|    |            | min(4)=                              | 4 -> 13 | -0.07796 |       | min(5)=                              | 2 -> 16 | -0.00635 |        |
|    |            | min(5)=                              | 2 -> 13 | -0.04564 |       | #states=20 #states>0=9 #states<0=11  |         |          |        |
|    |            | #states=34 #states>0=13 #states<0=21 |         | 24       |       | Singlet-B2                           | 36.4613 | 34.00    | 0.0132 |
|    |            |                                      |         |          |       |                                      |         |          | 0.000  |
| 21 | Singlet-A2 | 32.5557                              | 38.08   | 0.0000   | 0.000 | max(1)=                              | 2 -> 8  | 0.70193  |        |
|    |            | max(1)=                              | 3 -> 11 | 0.70682  |       | max(2)=                              | 3 -> 10 | 0.04063  |        |
|    |            | max(2)=                              | 5 -> 12 | 0.01868  |       | max(3)=                              | 4 -> 12 | 0.02309  |        |
|    |            | max(3)=                              | 3 -> 16 | 0.00515  |       | max(4)=                              | 3 -> 9  | 0.01872  |        |
|    |            | max(4)=                              | 3 -> 27 | 0.00474  |       | max(5)=                              | 3 -> 19 | 0.01043  |        |
|    |            | max(5)=                              | 2 -> 15 | 0.00408  |       | min(1)=                              | 2 -> 7  | -0.04660 |        |
|    |            | min(1)=                              | 5 -> 21 | -0.00040 |       | min(2)=                              | 3 -> 13 | -0.04061 |        |
|    |            | min(2)=                              | 2 -> 23 | -0.00013 |       | min(3)=                              | 5 -> 15 | -0.02747 |        |
|    |            | min(3)=                              | 5 -> 17 | -0.00008 |       | min(4)=                              | 3 -> 6  | -0.01090 |        |
|    |            | min(4)=                              | 5 -> 26 | 0.00015  |       | min(5)=                              | 2 -> 12 | -0.00575 |        |
|    |            | min(5)=                              | 5 -> 29 | 0.00021  |       | #states=29 #states>0=16 #states<0=13 |         |          |        |
|    |            | #states=16 #states>0=13 #states<0=3  |         | 25       |       | Singlet-A1                           | 36.7454 | 33.74    | 0.0155 |
|    |            |                                      |         |          |       |                                      |         |          | 0.000  |
| 22 | Singlet-B2 | 32.6057                              | 38.03   | 0.0715   | 0.000 | max(1)=                              | 4 -> 13 | 0.45863  |        |
|    |            | max(1)=                              | 3 -> 10 | 0.70183  |       | max(2)=                              | 2 -> 9  | 0.37355  |        |
|    |            | max(2)=                              | 4 -> 12 | 0.05425  |       | max(3)=                              | 2 -> 6  | 0.05708  |        |
|    |            | max(3)=                              | 3 -> 9  | 0.03306  |       | max(4)=                              | 4 -> 14 | 0.04690  |        |
|    |            |                                      |         |          |       | max(5)=                              | 2 -> 13 | 0.02161  |        |

|    |            |                                      |         |          |       |  |            |                                      |         |          |       |  |  |
|----|------------|--------------------------------------|---------|----------|-------|--|------------|--------------------------------------|---------|----------|-------|--|--|
|    |            | min(1)=                              | 3 -> 12 | -0.36537 |       |  |            | min(3)=                              | 4 -> 18 | -0.00602 |       |  |  |
|    |            | min(2)=                              | 4 -> 10 | -0.07242 |       |  |            | min(4)=                              | 4 -> 7  | -0.00452 |       |  |  |
|    |            | min(3)=                              | 5 -> 11 | -0.06040 |       |  |            | min(5)=                              | 2 -> 12 | -0.00221 |       |  |  |
|    |            | min(4)=                              | 3 -> 8  | -0.03184 |       |  |            | #states=27 #states>0=18 #states<0=9  |         |          |       |  |  |
|    |            | min(5)=                              | 2 -> 10 | -0.02044 |       |  |            |                                      |         |          |       |  |  |
|    |            | #states=34 #states>0=18 #states<0=16 |         |          | 29    |  | Singlet-A1 | 41.5677                              | 29.83   | 0.1166   | 0.000 |  |  |
|    |            |                                      |         |          |       |  |            | max(1)=                              | 3 -> 12 | 0.43955  |       |  |  |
| 26 | Singlet-A1 | 37.7280                              | 32.86   | 0.1525   | 0.000 |  |            | max(2)=                              | 2 -> 9  | 0.28204  |       |  |  |
|    |            | max(1)=                              | 2 -> 9  | 0.51484  |       |  |            | max(3)=                              | 5 -> 11 | 0.24599  |       |  |  |
|    |            | max(2)=                              | 3 -> 8  | 0.01380  |       |  |            | max(4)=                              | 4 -> 10 | 0.23623  |       |  |  |
|    |            | max(3)=                              | 2 -> 6  | 0.01327  |       |  |            | max(5)=                              | 4 -> 13 | 0.22929  |       |  |  |
|    |            | max(4)=                              | 2 -> 10 | 0.01316  |       |  |            | min(1)=                              | 2 -> 13 | -0.15527 |       |  |  |
|    |            | max(5)=                              | 3 -> 18 | 0.00515  |       |  |            | min(2)=                              | 4 -> 14 | -0.12715 |       |  |  |
|    |            | min(1)=                              | 4 -> 13 | -0.47829 |       |  |            | min(3)=                              | 2 -> 6  | -0.10825 |       |  |  |
|    |            | min(2)=                              | 3 -> 12 | -0.07042 |       |  |            | min(4)=                              | 4 -> 9  | -0.04234 |       |  |  |
|    |            | min(3)=                              | 4 -> 10 | -0.02153 |       |  |            | min(5)=                              | 2 -> 14 | -0.03711 |       |  |  |
|    |            | min(4)=                              | 5 -> 16 | -0.01458 |       |  |            | #states=34 #states>0=16 #states<0=18 |         |          |       |  |  |
|    |            | min(5)=                              | 4 -> 9  | -0.00910 |       |  |            |                                      |         |          |       |  |  |
|    |            | #states=34 #states>0=16 #states<0=18 |         |          | 30    |  | Singlet-B2 | 41.7356                              | 29.71   | 0.2993   | 0.000 |  |  |
|    |            |                                      |         |          |       |  |            | max(1)=                              | 3 -> 13 | 0.49106  |       |  |  |
| 27 | Singlet-B1 | 39.9174                              | 31.06   | 0.1543   | 0.000 |  |            | max(2)=                              | 3 -> 14 | 0.11443  |       |  |  |
|    |            | max(1)=                              | 5 -> 14 | 0.70186  |       |  |            | max(3)=                              | 2 -> 7  | 0.04167  |       |  |  |
|    |            | max(2)=                              | 5 -> 13 | 0.05138  |       |  |            | max(4)=                              | 4 -> 18 | 0.03530  |       |  |  |
|    |            | max(3)=                              | 4 -> 16 | 0.03444  |       |  |            | max(5)=                              | 4 -> 8  | 0.03363  |       |  |  |
|    |            | max(4)=                              | 5 -> 20 | 0.00563  |       |  |            | min(1)=                              | 5 -> 15 | -0.48759 |       |  |  |
|    |            | max(5)=                              | 5 -> 6  | 0.00309  |       |  |            | min(2)=                              | 2 -> 12 | -0.03995 |       |  |  |
|    |            | min(1)=                              | 3 -> 15 | -0.05544 |       |  |            | min(3)=                              | 3 -> 9  | -0.02908 |       |  |  |
|    |            | min(2)=                              | 5 -> 9  | -0.01411 |       |  |            | min(4)=                              | 3 -> 19 | -0.02258 |       |  |  |
|    |            | min(3)=                              | 5 -> 10 | -0.01302 |       |  |            | min(5)=                              | 4 -> 17 | -0.01930 |       |  |  |
|    |            | min(4)=                              | 2 -> 16 | -0.00800 |       |  |            | #states=29 #states>0=15 #states<0=14 |         |          |       |  |  |
|    |            | min(5)=                              | 5 -> 24 | -0.00635 |       |  |            |                                      |         |          |       |  |  |
|    |            | #states=21 #states>0=10 #states<0=11 |         |          | 31    |  | Singlet-A2 | 42.5653                              | 29.13   | 0.0000   | 0.000 |  |  |
|    |            |                                      |         |          |       |  |            | max(1)=                              | 4 -> 15 | 0.70702  |       |  |  |
| 28 | Singlet-B2 | 41.0057                              | 30.24   | 0.1354   | 0.000 |  |            | max(2)=                              | 4 -> 23 | 0.00788  |       |  |  |
|    |            | max(1)=                              | 3 -> 13 | 0.50218  |       |  |            | max(3)=                              | 3 -> 16 | 0.00465  |       |  |  |
|    |            | max(2)=                              | 5 -> 15 | 0.49075  |       |  |            | max(4)=                              | 5 -> 21 | 0.00433  |       |  |  |
|    |            | max(3)=                              | 2 -> 8  | 0.04624  |       |  |            | max(5)=                              | 2 -> 23 | 0.00263  |       |  |  |
|    |            | max(4)=                              | 3 -> 9  | 0.03435  |       |  |            | min(1)=                              | 2 -> 15 | -0.00344 |       |  |  |
|    |            | max(5)=                              | 3 -> 10 | 0.01399  |       |  |            | min(2)=                              | 5 -> 12 | -0.00287 |       |  |  |
|    |            | min(1)=                              | 3 -> 14 | -0.05363 |       |  |            | min(3)=                              | 3 -> 11 | -0.00231 |       |  |  |
|    |            | min(2)=                              | 4 -> 8  | -0.01843 |       |  |            | min(4)=                              | 5 -> 18 | -0.00197 |       |  |  |

|    |            |         |                                      |         |          |    |  |            |                                      |         |          |       |
|----|------------|---------|--------------------------------------|---------|----------|----|--|------------|--------------------------------------|---------|----------|-------|
|    |            |         | min(5)=                              | 3 -> 22 | -0.00088 |    |  |            | max(5)=                              | 5 -> 14 | 0.01143  |       |
|    |            |         | #states=16 #states>0=8 #states<0=8   |         |          |    |  |            | min(1)=                              | 4 -> 16 | -0.04529 |       |
| 32 | Singlet-A1 | 43.0050 | 28.83                                | 0.2949  | 0.000    |    |  |            | min(2)=                              | 5 -> 20 | -0.01266 |       |
|    |            |         | max(1)=                              | 4 -> 14 | 0.65511  |    |  |            | min(3)=                              | 5 -> 25 | -0.00640 |       |
|    |            |         | max(2)=                              | 3 -> 12 | 0.07714  |    |  |            | min(4)=                              | 5 -> 6  | -0.00352 |       |
|    |            |         | max(3)=                              | 4 -> 10 | 0.06582  |    |  |            | min(5)=                              | 5 -> 24 | -0.00331 |       |
|    |            |         | max(4)=                              | 5 -> 11 | 0.05746  |    |  |            | #states=21 #states>0=15 #states<0=6  |         |          |       |
|    |            |         | max(5)=                              | 3 -> 8  | 0.04229  | 35 |  | Singlet-B2 | 46.6248                              | 26.59   | 0.4669   | 0.000 |
|    |            |         | min(1)=                              | 5 -> 16 | -0.21775 |    |  |            | max(1)=                              | 3 -> 14 | 0.69181  |       |
|    |            |         | min(2)=                              | 2 -> 10 | -0.05573 |    |  |            | max(2)=                              | 5 -> 15 | 0.11017  |       |
|    |            |         | min(3)=                              | 2 -> 13 | -0.05376 |    |  |            | max(3)=                              | 2 -> 12 | 0.06058  |       |
|    |            |         | min(4)=                              | 4 -> 9  | -0.02003 |    |  |            | max(4)=                              | 3 -> 9  | 0.02927  |       |
|    |            |         | min(5)=                              | 3 -> 17 | -0.01494 |    |  |            | max(5)=                              | 3 -> 19 | 0.02577  |       |
|    |            |         | #states=34 #states>0=19 #states<0=15 |         |          |    |  |            | min(1)=                              | 3 -> 13 | -0.03756 |       |
|    |            |         |                                      |         |          |    |  |            | min(2)=                              | 4 -> 18 | -0.03331 |       |
| 33 | Singlet-A1 | 46.1901 | 26.84                                | 0.4031  | 0.000    |    |  |            | min(3)=                              | 4 -> 8  | -0.02828 |       |
|    |            |         | max(1)=                              | 2 -> 10 | 0.61488  |    |  |            | min(4)=                              | 2 -> 7  | -0.01462 |       |
|    |            |         | max(2)=                              | 2 -> 13 | 0.05756  |    |  |            | min(5)=                              | 5 -> 23 | -0.01454 |       |
|    |            |         | max(3)=                              | 4 -> 9  | 0.01346  |    |  |            | #states=29 #states>0=14 #states<0=15 |         |          |       |
|    |            |         | max(4)=                              | 2 -> 14 | 0.01293  |    |  |            |                                      |         |          |       |
|    |            |         | max(5)=                              | 4 -> 13 | 0.01091  | 36 |  | Singlet-B1 | 47.1570                              | 26.29   | 0.0698   | 0.000 |
|    |            |         | min(1)=                              | 5 -> 16 | -0.33361 |    |  |            | max(1)=                              | 3 -> 15 | 0.58822  |       |
|    |            |         | min(2)=                              | 3 -> 12 | -0.04863 |    |  |            | max(2)=                              | 4 -> 16 | 0.37646  |       |
|    |            |         | min(3)=                              | 4 -> 14 | -0.03980 |    |  |            | max(3)=                              | 5 -> 14 | 0.02667  |       |
|    |            |         | min(4)=                              | 4 -> 10 | -0.03068 |    |  |            | max(4)=                              | 5 -> 13 | 0.01396  |       |
|    |            |         | min(5)=                              | 5 -> 11 | -0.02834 |    |  |            | max(5)=                              | 2 -> 22 | 0.00588  |       |
|    |            |         | #states=34 #states>0=20 #states<0=14 |         |          |    |  |            | min(1)=                              | 2 -> 11 | -0.10346 |       |
|    |            |         |                                      |         |          |    |  |            | min(2)=                              | 5 -> 19 | -0.02000 |       |
| 34 | Singlet-B1 | 46.3378 | 26.76                                | 0.3301  | 0.000    |    |  |            | min(3)=                              | 5 -> 9  | -0.01160 |       |
|    |            |         | max(1)=                              | 2 -> 11 | 0.68852  |    |  |            | min(4)=                              | 4 -> 22 | -0.01026 |       |
|    |            |         | max(2)=                              | 3 -> 15 | 0.14998  |    |  |            | min(5)=                              | 5 -> 10 | -0.00410 |       |
|    |            |         | max(3)=                              | 5 -> 13 | 0.02656  |    |  |            | #states=20 #states>0=11 #states<0=9  |         |          |       |
|    |            |         | max(4)=                              | 5 -> 19 | 0.01564  |    |  |            |                                      |         |          |       |

### 7.1.3 Main contributions from different excited states at CIS approach

| #_exc.st | __symm__   | Exc.E  | Osc._Strength | __f__  | _ <s**2>_</s**2> |  |                         |
|----------|------------|--------|---------------|--------|------------------|--|-------------------------|
| 1        | Singlet-B1 | 9.1435 | 135.60        | 0.0334 | 0.000            |  | max(1)= 5 -> 6 0.69518  |
|          |            |        |               |        |                  |  | max(2)= 5 -> 10 0.05494 |
|          |            |        |               |        |                  |  | max(3)= 5 -> 25 0.00722 |



|   |            |                                      |         |          |       |  |            |                                      |         |          |       |  |
|---|------------|--------------------------------------|---------|----------|-------|--|------------|--------------------------------------|---------|----------|-------|--|
|   |            | max(4)=                              | 5 -> 19 | 0.00552  |       |  |            | min(1)=                              | 2 -> 7  | -0.01435 |       |  |
|   |            | max(5)=                              | 5 -> 24 | 0.00356  |       |  |            | min(2)=                              | 4 -> 18 | -0.00906 |       |  |
|   |            | min(1)=                              | 5 -> 9  | -0.10597 |       |  |            | min(3)=                              | 3 -> 19 | -0.00604 |       |  |
|   |            | min(2)=                              | 5 -> 13 | -0.04558 |       |  |            | min(4)=                              | 2 -> 8  | -0.00597 |       |  |
|   |            | min(3)=                              | 5 -> 14 | -0.01226 |       |  |            | min(5)=                              | 2 -> 18 | -0.00540 |       |  |
|   |            | min(4)=                              | 5 -> 20 | -0.00711 |       |  |            | #states=28 #states>0=17 #states<0=11 |         |          |       |  |
|   |            | min(5)=                              | 4 -> 22 | -0.00503 |       |  |            |                                      |         |          |       |  |
|   |            | #states=20 #states>0=9 #states<0=11  |         |          | 5     |  | Singlet-B2 | 15.1582                              | 81.79   | 0.2558   | 0.000 |  |
|   |            |                                      |         |          |       |  |            | max(1)=                              | 3 -> 6  | 0.69771  |       |  |
| 2 | Singlet-A2 | 10.9976                              | 112.74  | 0.0000   | 0.000 |  |            | max(2)=                              | 3 -> 10 | 0.05047  |       |  |
|   |            | max(1)=                              | 5 -> 7  | 0.67657  |       |  |            | max(3)=                              | 4 -> 7  | 0.00692  |       |  |
|   |            | max(2)=                              | 5 -> 8  | 0.17849  |       |  |            | max(4)=                              | 3 -> 19 | 0.00438  |       |  |
|   |            | max(3)=                              | 5 -> 12 | 0.09969  |       |  |            | max(5)=                              | 5 -> 15 | 0.00434  |       |  |
|   |            | max(4)=                              | 5 -> 21 | 0.00613  |       |  |            | min(1)=                              | 3 -> 9  | -0.08306 |       |  |
|   |            | max(5)=                              | 5 -> 29 | 0.00465  |       |  |            | min(2)=                              | 4 -> 8  | -0.03719 |       |  |
|   |            | min(1)=                              | 5 -> 18 | -0.01808 |       |  |            | min(3)=                              | 3 -> 13 | -0.03667 |       |  |
|   |            | min(2)=                              | 3 -> 11 | -0.00342 |       |  |            | min(4)=                              | 2 -> 7  | -0.02717 |       |  |
|   |            | min(3)=                              | 2 -> 23 | -0.00233 |       |  |            | min(5)=                              | 3 -> 20 | -0.00886 |       |  |
|   |            | min(4)=                              | 4 -> 15 | -0.00054 |       |  |            | #states=27 #states>0=14 #states<0=13 |         |          |       |  |
|   |            | min(5)=                              | 4 -> 23 | -0.00027 |       |  |            |                                      |         |          |       |  |
|   |            | #states=16 #states>0=10 #states<0=6  |         |          | 6     |  | Singlet-A1 | 18.1618                              | 68.27   | 0.1038   | 0.000 |  |
|   |            |                                      |         |          |       |  |            | max(1)=                              | 3 -> 7  | 0.68186  |       |  |
| 3 | Singlet-A1 | 11.6285                              | 106.62  | 0.1068   | 0.000 |  |            | max(2)=                              | 3 -> 8  | 0.08424  |       |  |
|   |            | max(1)=                              | 4 -> 6  | 0.69628  |       |  |            | max(3)=                              | 4 -> 9  | 0.06440  |       |  |
|   |            | max(2)=                              | 4 -> 10 | 0.01680  |       |  |            | max(4)=                              | 4 -> 6  | 0.04995  |       |  |
|   |            | max(3)=                              | 4 -> 19 | 0.00583  |       |  |            | max(5)=                              | 3 -> 12 | 0.04112  |       |  |
|   |            | max(4)=                              | 3 -> 18 | 0.00353  |       |  |            | min(1)=                              | 5 -> 11 | -0.11005 |       |  |
|   |            | max(5)=                              | 2 -> 19 | 0.00296  |       |  |            | min(2)=                              | 4 -> 10 | -0.08070 |       |  |
|   |            | min(1)=                              | 4 -> 9  | -0.08738 |       |  |            | min(3)=                              | 2 -> 13 | -0.02116 |       |  |
|   |            | min(2)=                              | 4 -> 13 | -0.04633 |       |  |            | min(4)=                              | 4 -> 14 | -0.01121 |       |  |
|   |            | min(3)=                              | 3 -> 7  | -0.04312 |       |  |            | min(5)=                              | 4 -> 13 | -0.00981 |       |  |
|   |            | min(4)=                              | 5 -> 11 | -0.03734 |       |  |            | #states=32 #states>0=14 #states<0=18 |         |          |       |  |
|   |            | min(5)=                              | 3 -> 8  | -0.03001 |       |  |            |                                      |         |          |       |  |
|   |            | #states=31 #states>0=10 #states<0=21 |         |          | 7     |  | Singlet-A2 | 18.3499                              | 67.57   | 0.0000   | 0.000 |  |
|   |            |                                      |         |          |       |  |            | max(1)=                              | 5 -> 8  | 0.68094  |       |  |
| 4 | Singlet-B2 | 13.4601                              | 92.11   | 0.0774   | 0.000 |  |            | max(2)=                              | 5 -> 12 | 0.02015  |       |  |
|   |            | max(1)=                              | 4 -> 7  | 0.69007  |       |  |            | max(3)=                              | 5 -> 17 | 0.01640  |       |  |
|   |            | max(2)=                              | 4 -> 8  | 0.11713  |       |  |            | max(4)=                              | 2 -> 15 | 0.00592  |       |  |
|   |            | max(3)=                              | 4 -> 12 | 0.09317  |       |  |            | max(5)=                              | 5 -> 29 | 0.00344  |       |  |
|   |            | max(4)=                              | 3 -> 9  | 0.02572  |       |  |            | min(1)=                              | 5 -> 7  | -0.18393 |       |  |
|   |            | max(5)=                              | 5 -> 15 | 0.01164  |       |  |            | min(2)=                              | 5 -> 18 | -0.04149 |       |  |

|    |            |                                      |         |          |       |  |            |                                      |         |          |       |  |
|----|------------|--------------------------------------|---------|----------|-------|--|------------|--------------------------------------|---------|----------|-------|--|
|    |            | min(3)=                              | 3 -> 11 | -0.00457 |       |  |            | min(5)=                              | 3 -> 18 | -0.00817 |       |  |
|    |            | min(4)=                              | 2 -> 23 | -0.00179 |       |  |            | #states=32 #states>0=19 #states<0=13 |         |          |       |  |
|    |            | min(5)=                              | 5 -> 26 | -0.00082 |       |  |            |                                      |         |          |       |  |
|    |            | #states=15 #states>0=10 #states<0=5  |         |          | 11    |  | Singlet-A1 | 25.6809                              | 48.28   | 0.3664   | 0.000 |  |
|    |            |                                      |         |          |       |  |            | max(1)=                              | 3 -> 8  | 0.67337  |       |  |
| 8  | Singlet-B1 | 20.2860                              | 61.12   | 0.1541   | 0.000 |  |            | max(2)=                              | 2 -> 9  | 0.03073  |       |  |
|    |            | max(1)=                              | 5 -> 9  | 0.68891  |       |  |            | max(3)=                              | 3 -> 12 | 0.02558  |       |  |
|    |            | max(2)=                              | 5 -> 6  | 0.11412  |       |  |            | max(4)=                              | 4 -> 13 | 0.01546  |       |  |
|    |            | max(3)=                              | 5 -> 14 | 0.02534  |       |  |            | max(5)=                              | 4 -> 6  | 0.01047  |       |  |
|    |            | max(4)=                              | 3 -> 15 | 0.02465  |       |  |            | min(1)=                              | 5 -> 11 | -0.14822 |       |  |
|    |            | max(5)=                              | 4 -> 22 | 0.01113  |       |  |            | min(2)=                              | 3 -> 7  | -0.11290 |       |  |
|    |            | min(1)=                              | 5 -> 10 | -0.09559 |       |  |            | min(3)=                              | 4 -> 10 | -0.05653 |       |  |
|    |            | min(2)=                              | 5 -> 19 | -0.02832 |       |  |            | min(4)=                              | 4 -> 9  | -0.04766 |       |  |
|    |            | min(3)=                              | 4 -> 16 | -0.01626 |       |  |            | min(5)=                              | 4 -> 14 | -0.04454 |       |  |
|    |            | min(4)=                              | 2 -> 11 | -0.01490 |       |  |            | #states=31 #states>0=14 #states<0=17 |         |          |       |  |
|    |            | min(5)=                              | 5 -> 25 | -0.01030 |       |  |            |                                      |         |          |       |  |
|    |            | #states=21 #states>0=12 #states<0=9  |         |          | 12    |  | Singlet-B2 | 27.0060                              | 45.91   | 0.5800   | 0.000 |  |
|    |            |                                      |         |          |       |  |            | max(1)=                              | 3 -> 9  | 0.67812  |       |  |
| 9  | Singlet-B2 | 21.5272                              | 57.59   | 0.2114   | 0.000 |  |            | max(2)=                              | 3 -> 6  | 0.08248  |       |  |
|    |            | max(1)=                              | 4 -> 8  | 0.67789  |       |  |            | max(3)=                              | 2 -> 7  | 0.04611  |       |  |
|    |            | max(2)=                              | 3 -> 9  | 0.13310  |       |  |            | max(4)=                              | 2 -> 8  | 0.03192  |       |  |
|    |            | max(3)=                              | 3 -> 6  | 0.05162  |       |  |            | max(5)=                              | 2 -> 12 | 0.02255  |       |  |
|    |            | max(4)=                              | 5 -> 15 | 0.03412  |       |  |            | min(1)=                              | 4 -> 8  | -0.13319 |       |  |
|    |            | max(5)=                              | 3 -> 14 | 0.02330  |       |  |            | min(2)=                              | 3 -> 10 | -0.08283 |       |  |
|    |            | min(1)=                              | 4 -> 7  | -0.12491 |       |  |            | min(3)=                              | 5 -> 15 | -0.05735 |       |  |
|    |            | min(2)=                              | 4 -> 18 | -0.02601 |       |  |            | min(4)=                              | 4 -> 12 | -0.02643 |       |  |
|    |            | min(3)=                              | 2 -> 7  | -0.02316 |       |  |            | min(5)=                              | 3 -> 19 | -0.01851 |       |  |
|    |            | min(4)=                              | 3 -> 13 | -0.01782 |       |  |            | #states=27 #states>0=12 #states<0=15 |         |          |       |  |
|    |            | min(5)=                              | 3 -> 19 | -0.01612 |       |  |            |                                      |         |          |       |  |
|    |            | #states=28 #states>0=16 #states<0=12 |         |          | 13    |  | Singlet-B1 | 27.2615                              | 45.48   | 0.0033   | 0.000 |  |
|    |            |                                      |         |          |       |  |            | max(1)=                              | 5 -> 10 | 0.69414  |       |  |
| 10 | Singlet-A1 | 22.3378                              | 55.50   | 0.0065   | 0.000 |  |            | max(2)=                              | 5 -> 9  | 0.10012  |       |  |
|    |            | max(1)=                              | 4 -> 9  | 0.68979  |       |  |            | max(3)=                              | 5 -> 14 | 0.03855  |       |  |
|    |            | max(2)=                              | 4 -> 6  | 0.09055  |       |  |            | max(4)=                              | 5 -> 13 | 0.03081  |       |  |
|    |            | max(3)=                              | 5 -> 11 | 0.07695  |       |  |            | max(5)=                              | 5 -> 19 | 0.01715  |       |  |
|    |            | max(4)=                              | 3 -> 8  | 0.05313  |       |  |            | min(1)=                              | 4 -> 11 | -0.05686 |       |  |
|    |            | max(5)=                              | 4 -> 14 | 0.01915  |       |  |            | min(2)=                              | 5 -> 6  | -0.03750 |       |  |
|    |            | min(1)=                              | 3 -> 7  | -0.06763 |       |  |            | min(3)=                              | 4 -> 16 | -0.01272 |       |  |
|    |            | min(2)=                              | 4 -> 19 | -0.03185 |       |  |            | min(4)=                              | 5 -> 20 | -0.00870 |       |  |
|    |            | min(3)=                              | 2 -> 6  | -0.02035 |       |  |            | min(5)=                              | 2 -> 11 | -0.00357 |       |  |
|    |            | min(4)=                              | 4 -> 10 | -0.00954 |       |  |            | #states=21 #states>0=13 #states<0=8  |         |          |       |  |

|    |            |         |       |        |       |                                      |         |          |        |       |
|----|------------|---------|-------|--------|-------|--------------------------------------|---------|----------|--------|-------|
|    |            |         |       |        |       | max(1)=                              | 2 -> 6  | 0.60273  |        |       |
| 14 | Singlet-A1 | 28.2577 | 43.88 | 0.0348 | 0.000 | max(2)=                              | 4 -> 10 | 0.28259  |        |       |
|    |            |         |       |        |       | max(3)=                              | 5 -> 11 | 0.15393  |        |       |
|    |            |         |       |        |       | max(4)=                              | 3 -> 8  | 0.07180  |        |       |
|    |            |         |       |        |       | max(5)=                              | 3 -> 7  | 0.05580  |        |       |
|    |            |         |       |        |       | min(1)=                              | 2 -> 9  | -0.10806 |        |       |
|    |            |         |       |        |       | min(2)=                              | 3 -> 12 | -0.08806 |        |       |
|    |            |         |       |        |       | min(3)=                              | 2 -> 13 | -0.04101 |        |       |
|    |            |         |       |        |       | min(4)=                              | 4 -> 14 | -0.02765 |        |       |
|    |            |         |       |        |       | min(5)=                              | 5 -> 16 | -0.01880 |        |       |
|    |            |         |       |        |       | #states=33 #states>0=21 #states<0=12 |         |          |        |       |
|    |            |         |       |        |       |                                      |         |          |        |       |
|    |            |         |       |        | 18    | Singlet-B2                           | 32.9175 | 37.67    | 0.0662 | 0.000 |
|    |            |         |       |        |       | max(1)=                              | 4 -> 12 | 0.69403  |        |       |
| 15 | Singlet-B1 | 29.3023 | 42.31 | 0.0020 | 0.000 | max(2)=                              | 2 -> 7  | 0.07541  |        |       |
|    |            |         |       |        |       | max(3)=                              | 2 -> 12 | 0.02083  |        |       |
|    |            |         |       |        |       | max(4)=                              | 4 -> 26 | 0.01833  |        |       |
|    |            |         |       |        |       | max(5)=                              | 4 -> 29 | 0.01056  |        |       |
|    |            |         |       |        |       | min(1)=                              | 4 -> 7  | -0.08737 |        |       |
|    |            |         |       |        |       | min(2)=                              | 4 -> 8  | -0.03599 |        |       |
|    |            |         |       |        |       | min(3)=                              | 3 -> 10 | -0.03290 |        |       |
|    |            |         |       |        |       | min(4)=                              | 4 -> 18 | -0.03150 |        |       |
|    |            |         |       |        |       | min(5)=                              | 2 -> 8  | -0.01558 |        |       |
|    |            |         |       |        |       | #states=25 #states>0=12 #states<0=13 |         |          |        |       |
|    |            |         |       |        |       |                                      |         |          |        |       |
|    |            |         |       |        | 19    | Singlet-A2                           | 33.7332 | 36.75    | 0.0000 | 0.000 |
|    |            |         |       |        |       | max(1)=                              | 3 -> 11 | 0.70597  |        |       |
| 16 | Singlet-A2 | 30.8203 | 40.23 | 0.0000 | 0.000 | max(2)=                              | 3 -> 16 | 0.02493  |        |       |
|    |            |         |       |        |       | max(3)=                              | 5 -> 12 | 0.02242  |        |       |
|    |            |         |       |        |       | max(4)=                              | 3 -> 27 | 0.01668  |        |       |
|    |            |         |       |        |       | max(5)=                              | 2 -> 15 | 0.01003  |        |       |
|    |            |         |       |        |       | min(1)=                              | 2 -> 23 | -0.00610 |        |       |
|    |            |         |       |        |       | min(2)=                              | 4 -> 15 | -0.00465 |        |       |
|    |            |         |       |        |       | min(3)=                              | 5 -> 7  | -0.00081 |        |       |
|    |            |         |       |        |       | min(4)=                              | 5 -> 29 | -0.00013 |        |       |
|    |            |         |       |        |       | min(5)=                              | 5 -> 26 | -0.00011 |        |       |
|    |            |         |       |        |       | #states=16 #states>0=11 #states<0=5  |         |          |        |       |
|    |            |         |       |        |       |                                      |         |          |        |       |
|    |            |         |       |        | 20    | Singlet-B2                           | 33.9624 | 36.51    | 0.0927 | 0.000 |
|    |            |         |       |        |       | max(1)=                              | 3 -> 10 | 0.65878  |        |       |
| 17 | Singlet-A1 | 32.1386 | 38.58 | 0.0020 | 0.000 | max(2)=                              | 2 -> 7  | 0.23906  |        |       |

|    |            |                                      |         |          |       |  |  |                                      |         |          |        |       |
|----|------------|--------------------------------------|---------|----------|-------|--|--|--------------------------------------|---------|----------|--------|-------|
|    |            | max(3)=                              | 3 -> 9  | 0.06643  |       |  |  | max(5)=                              | 4 -> 16 | 0.01432  |        |       |
|    |            | max(4)=                              | 2 -> 12 | 0.04028  |       |  |  | min(1)=                              | 3 -> 15 | -0.02827 |        |       |
|    |            | max(5)=                              | 3 -> 14 | 0.02538  |       |  |  | min(2)=                              | 5 -> 10 | -0.02638 |        |       |
|    |            | min(1)=                              | 3 -> 6  | -0.03125 |       |  |  | min(3)=                              | 4 -> 11 | -0.02333 |        |       |
|    |            | min(2)=                              | 3 -> 13 | -0.01754 |       |  |  | min(4)=                              | 5 -> 9  | -0.01633 |        |       |
|    |            | min(3)=                              | 5 -> 15 | -0.00884 |       |  |  | min(5)=                              | 5 -> 25 | -0.01609 |        |       |
|    |            | min(4)=                              | 3 -> 20 | -0.00816 |       |  |  | #states=21 #states>0=10 #states<0=11 |         |          |        |       |
|    |            | min(5)=                              | 2 -> 18 | -0.00727 |       |  |  |                                      |         |          |        |       |
|    |            | #states=28 #states>0=16 #states<0=12 | 24      |          |       |  |  | Singlet-A1                           | 38.6227 | 32.10    | 0.1823 | 0.000 |
| 21 | Singlet-A1 | 34.4238                              | 36.02   | 0.0476   | 0.000 |  |  | max(1)=                              | 4 -> 13 | 0.68243  |        |       |
|    |            | max(1)=                              | 3 -> 12 | 0.42831  |       |  |  | max(2)=                              | 4 -> 14 | 0.06061  |        |       |
|    |            | max(2)=                              | 2 -> 6  | 0.32214  |       |  |  | max(3)=                              | 4 -> 6  | 0.04244  |        |       |
|    |            | max(3)=                              | 2 -> 9  | 0.04064  |       |  |  | max(4)=                              | 2 -> 6  | 0.03135  |        |       |
|    |            | max(4)=                              | 4 -> 9  | 0.02431  |       |  |  | max(5)=                              | 2 -> 10 | 0.03108  |        |       |
|    |            | max(5)=                              | 4 -> 14 | 0.02087  |       |  |  | min(1)=                              | 3 -> 12 | -0.13386 |        |       |
|    |            | min(1)=                              | 4 -> 10 | -0.34337 |       |  |  | min(2)=                              | 4 -> 10 | -0.07313 |        |       |
|    |            | min(2)=                              | 5 -> 11 | -0.25990 |       |  |  | min(3)=                              | 5 -> 11 | -0.04533 |        |       |
|    |            | min(3)=                              | 3 -> 8  | -0.11649 |       |  |  | min(4)=                              | 3 -> 8  | -0.02165 |        |       |
|    |            | min(4)=                              | 3 -> 7  | -0.09233 |       |  |  | min(5)=                              | 4 -> 25 | -0.01294 |        |       |
|    |            | min(5)=                              | 3 -> 18 | -0.02545 |       |  |  | #states=33 #states>0=22 #states<0=11 |         |          |        |       |
|    |            | #states=33 #states>0=20 #states<0=13 | 25      |          |       |  |  | Singlet-B2                           | 41.7617 | 29.69    | 0.0071 | 0.000 |
| 22 | Singlet-B2 | 34.5364                              | 35.90   | 0.0024   | 0.000 |  |  | max(1)=                              | 2 -> 8  | 0.68256  |        |       |
|    |            | max(1)=                              | 2 -> 7  | 0.63055  |       |  |  | max(2)=                              | 3 -> 10 | 0.04830  |        |       |
|    |            | max(2)=                              | 2 -> 8  | 0.16759  |       |  |  | max(3)=                              | 4 -> 12 | 0.03401  |        |       |
|    |            | max(3)=                              | 2 -> 12 | 0.06511  |       |  |  | max(4)=                              | 2 -> 12 | 0.02331  |        |       |
|    |            | max(4)=                              | 5 -> 15 | 0.06019  |       |  |  | max(5)=                              | 5 -> 15 | 0.01912  |        |       |
|    |            | max(5)=                              | 4 -> 8  | 0.03692  |       |  |  | min(1)=                              | 2 -> 7  | -0.16609 |        |       |
|    |            | min(1)=                              | 3 -> 10 | -0.22620 |       |  |  | min(2)=                              | 2 -> 18 | -0.03097 |        |       |
|    |            | min(2)=                              | 3 -> 9  | -0.07412 |       |  |  | min(3)=                              | 4 -> 17 | -0.01476 |        |       |
|    |            | min(3)=                              | 4 -> 12 | -0.07274 |       |  |  | min(4)=                              | 3 -> 6  | -0.01196 |        |       |
|    |            | min(4)=                              | 3 -> 13 | -0.03724 |       |  |  | min(5)=                              | 3 -> 9  | -0.01089 |        |       |
|    |            | min(5)=                              | 2 -> 18 | -0.00980 |       |  |  | #states=28 #states>0=16 #states<0=12 |         |          |        |       |
|    |            | #states=28 #states>0=16 #states<0=12 | 26      |          |       |  |  | Singlet-B1                           | 42.0235 | 29.50    | 0.1561 | 0.000 |
| 23 | Singlet-B1 | 36.5430                              | 33.93   | 0.3422   | 0.000 |  |  | max(1)=                              | 5 -> 14 | 0.70071  |        |       |
|    |            | max(1)=                              | 5 -> 13 | 0.70240  |       |  |  | max(2)=                              | 2 -> 11 | 0.03494  |        |       |
|    |            | max(2)=                              | 5 -> 6  | 0.04567  |       |  |  | max(3)=                              | 4 -> 16 | 0.03492  |        |       |
|    |            | max(3)=                              | 2 -> 11 | 0.03321  |       |  |  | max(4)=                              | 5 -> 20 | 0.01183  |        |       |
|    |            | max(4)=                              | 5 -> 20 | 0.02217  |       |  |  | max(5)=                              | 5 -> 6  | 0.01042  |        |       |
|    |            |                                      |         |          |       |  |  | min(1)=                              | 3 -> 15 | -0.05856 |        |       |

|    |            |                                      |         |          |       |  |                                      |         |          |        |       |
|----|------------|--------------------------------------|---------|----------|-------|--|--------------------------------------|---------|----------|--------|-------|
|    |            | min(2)=                              | 5 -> 10 | -0.03304 |       |  | min(4)=                              | 4 -> 8  | -0.04507 |        |       |
|    |            | min(3)=                              | 5 -> 9  | -0.02867 |       |  | min(5)=                              | 4 -> 18 | -0.03734 |        |       |
|    |            | min(4)=                              | 5 -> 24 | -0.02765 |       |  | #states=29 #states>0=13 #states<0=16 |         |          |        |       |
|    |            | min(5)=                              | 2 -> 16 | -0.00874 |       |  |                                      |         |          |        |       |
|    |            | #states=21 #states>0=9 #states<0=12  |         |          | 30    |  | Singlet-A2                           | 44.8333 | 27.65    | 0.0000 | 0.000 |
|    |            |                                      |         |          |       |  | max(1)=                              | 4 -> 15 | 0.70546  |        |       |
| 27 | Singlet-A1 | 42.1927                              | 29.39   | 0.0734   | 0.000 |  | max(2)=                              | 4 -> 23 | 0.02901  |        |       |
|    |            | max(1)=                              | 2 -> 9  | 0.54454  |       |  | max(3)=                              | 3 -> 11 | 0.00592  |        |       |
|    |            | max(2)=                              | 2 -> 6  | 0.15166  |       |  | max(4)=                              | 2 -> 23 | 0.00589  |        |       |
|    |            | max(3)=                              | 4 -> 14 | 0.08151  |       |  | max(5)=                              | 5 -> 21 | 0.00578  |        |       |
|    |            | max(4)=                              | 5 -> 16 | 0.04288  |       |  | min(1)=                              | 2 -> 15 | -0.02964 |        |       |
|    |            | max(5)=                              | 2 -> 13 | 0.03024  |       |  | min(2)=                              | 3 -> 16 | -0.02206 |        |       |
|    |            | min(1)=                              | 3 -> 12 | -0.34801 |       |  | min(3)=                              | 5 -> 12 | -0.00231 |        |       |
|    |            | min(2)=                              | 4 -> 10 | -0.12503 |       |  | min(4)=                              | 5 -> 18 | -0.00173 |        |       |
|    |            | min(3)=                              | 5 -> 11 | -0.11016 |       |  | min(5)=                              | 3 -> 22 | -0.00158 |        |       |
|    |            | min(4)=                              | 4 -> 13 | -0.10997 |       |  | #states=16 #states>0=10 #states<0=6  |         |          |        |       |
|    |            | min(5)=                              | 2 -> 10 | -0.07825 |       |  |                                      |         |          |        |       |
|    |            | #states=32 #states>0=15 #states<0=17 |         |          | 31    |  | Singlet-A1                           | 45.0818 | 27.50    | 0.2982 | 0.000 |
|    |            |                                      |         |          |       |  | max(1)=                              | 4 -> 14 | 0.47648  |        |       |
| 28 | Singlet-B2 | 42.6650                              | 29.06   | 0.0658   | 0.000 |  | max(2)=                              | 2 -> 13 | 0.07653  |        |       |
|    |            | max(1)=                              | 3 -> 13 | 0.62289  |       |  | max(3)=                              | 2 -> 6  | 0.04783  |        |       |
|    |            | max(2)=                              | 5 -> 15 | 0.32791  |       |  | max(4)=                              | 5 -> 22 | 0.02402  |        |       |
|    |            | max(3)=                              | 2 -> 12 | 0.04011  |       |  | max(5)=                              | 2 -> 20 | 0.01195  |        |       |
|    |            | max(4)=                              | 3 -> 6  | 0.03196  |       |  | min(1)=                              | 2 -> 9  | -0.34241 |        |       |
|    |            | max(5)=                              | 3 -> 20 | 0.02091  |       |  | min(2)=                              | 3 -> 12 | -0.25008 |        |       |
|    |            | min(1)=                              | 3 -> 14 | -0.01060 |       |  | min(3)=                              | 5 -> 11 | -0.16084 |        |       |
|    |            | min(2)=                              | 3 -> 25 | -0.00644 |       |  | min(4)=                              | 4 -> 10 | -0.15815 |        |       |
|    |            | min(3)=                              | 4 -> 8  | -0.00507 |       |  | min(5)=                              | 5 -> 16 | -0.11879 |        |       |
|    |            | min(4)=                              | 4 -> 7  | -0.00289 |       |  | #states=33 #states>0=18 #states<0=15 |         |          |        |       |
|    |            | min(5)=                              | 2 -> 8  | -0.00155 |       |  |                                      |         |          |        |       |
|    |            | #states=29 #states>0=20 #states<0=9  |         |          | 32    |  | Singlet-A1                           | 45.7819 | 27.08    | 0.1032 | 0.000 |
|    |            |                                      |         |          |       |  | max(1)=                              | 4 -> 14 | 0.44738  |        |       |
| 29 | Singlet-B2 | 43.9053                              | 28.24   | 0.4593   | 0.000 |  | max(2)=                              | 3 -> 12 | 0.29431  |        |       |
|    |            | max(1)=                              | 5 -> 15 | 0.60140  |       |  | max(3)=                              | 2 -> 9  | 0.25822  |        |       |
|    |            | max(2)=                              | 3 -> 9  | 0.05190  |       |  | max(4)=                              | 5 -> 11 | 0.19824  |        |       |
|    |            | max(3)=                              | 3 -> 19 | 0.02666  |       |  | max(5)=                              | 4 -> 10 | 0.17814  |        |       |
|    |            | max(4)=                              | 4 -> 17 | 0.02440  |       |  | min(1)=                              | 5 -> 16 | -0.22536 |        |       |
|    |            | max(5)=                              | 3 -> 10 | 0.01691  |       |  | min(2)=                              | 2 -> 13 | -0.09773 |        |       |
|    |            | min(1)=                              | 3 -> 13 | -0.31918 |       |  | min(3)=                              | 2 -> 6  | -0.04880 |        |       |
|    |            | min(2)=                              | 3 -> 14 | -0.15346 |       |  | min(4)=                              | 4 -> 9  | -0.03835 |        |       |
|    |            | min(3)=                              | 2 -> 7  | -0.05055 |       |  | min(5)=                              | 2 -> 14 | -0.02401 |        |       |

```

#states=32 #states>0=16 #states<0=16
35 Singlet-A1 49.6651 24.96 0.9053 0.000
33 Singlet-B2 48.5010 25.56 0.6210 0.000
max(1)= 3 -> 14 0.67999 max(1)= 5 -> 16 0.60968
max(2)= 5 -> 15 0.12960 max(2)= 4 -> 14 0.19094
max(3)= 2 -> 12 0.08822 max(3)= 3 -> 12 0.08274
max(4)= 4 -> 17 0.04585 max(4)= 4 -> 10 0.06910
max(5)= 3 -> 19 0.02988 max(5)= 3 -> 18 0.05888
min(1)= 3 -> 13 -0.06053 min(1)= 2 -> 10 -0.25123
min(2)= 2 -> 17 -0.04136 min(2)= 2 -> 13 -0.07250
min(3)= 4 -> 8 -0.03682 min(3)= 4 -> 19 -0.02658
min(4)= 4 -> 18 -0.03179 min(4)= 3 -> 17 -0.02650
min(5)= 2 -> 7 -0.03020 min(5)= 4 -> 9 -0.02388
#states=33 #states>0=16 #states<0=17
#states=28 #states>0=13 #states<0=15
36 Singlet-B1 50.4783 24.56 0.2298 0.000
34 Singlet-B1 48.9576 25.32 0.6080 0.000
max(1)= 3 -> 15 0.64380 max(1)= 2 -> 11 0.54624
max(2)= 2 -> 11 0.25506 max(2)= 2 -> 16 0.02227
max(3)= 4 -> 16 0.12313 max(3)= 4 -> 22 0.01636
max(4)= 2 -> 16 0.04626 max(4)= 2 -> 27 0.01540
max(5)= 5 -> 14 0.03417 max(5)= 5 -> 9 0.00624
min(1)= 5 -> 19 -0.02506 min(1)= 4 -> 16 -0.42598
min(2)= 5 -> 9 -0.01912 min(2)= 3 -> 15 -0.13474
min(3)= 4 -> 22 -0.01893 min(3)= 5 -> 13 -0.02236
min(4)= 4 -> 11 -0.00794 min(4)= 5 -> 14 -0.01666
min(5)= 5 -> 10 -0.00645 min(5)= 3 -> 23 -0.01037
#states=20 #states>0=10 #states<0=10
#states=20 #states>0=14 #states<0=6

```

## 7.2 6-311++G(d,p)

### 7.2.1 Plots

Figure S10: For H<sub>2</sub>O molecule and 6-311++G(d,p) basis set, variation of  $\alpha_{ZZ}$  (top) and  $\beta_{ZZZ}$  (bottom) with respect to the number of orbitals (FIOs decomposition presented in this work, in Plots S10a and S10c) or states (SOS approaches, in Plots S10b and S10d). For  $\alpha$  FIOs, three approaches were considered: CPKS (CAM-B3LYP), CPHF and UPHF. For  $\beta$  FIOs, the results of CPKS and CPHF approaches are provided. All elements of the  $\beta$  tensor were recomputed with an error less than 0.01 au in the case of the FIOs. For SOS approach, TDDFT (CAM-B3LYP) and CIS methods were employed. Recomputed values of  $\alpha_{ZZ}$  and  $\beta_{ZZZ}$  for the different approaches are included in each plot. HOMO (H) and LUMO (L) are represented by blue and pink dotted lines, respectively.

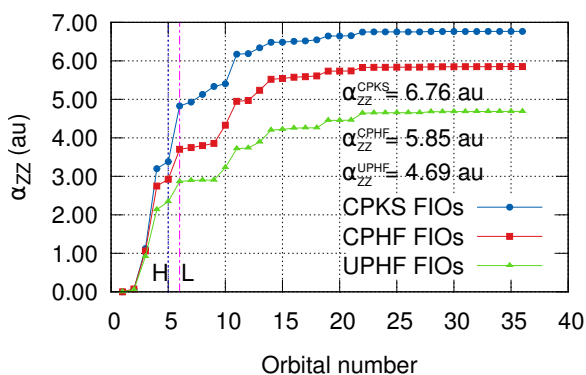

(a) CPKS-, CPHF- and UPHF-FIOs decomposition of  $\alpha_{ZZ}$  into MOs.

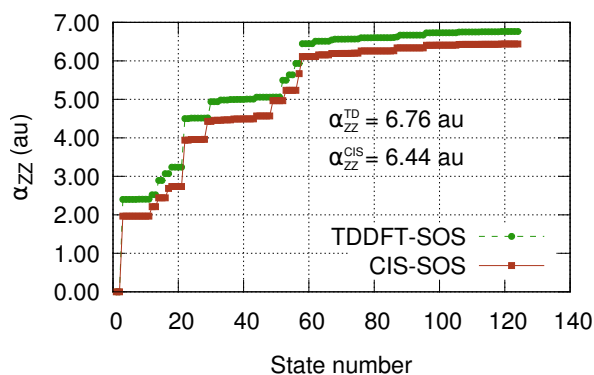

(b) TDDFT- and CIS-SOS decomposition of  $\alpha_{ZZ}$  into states.

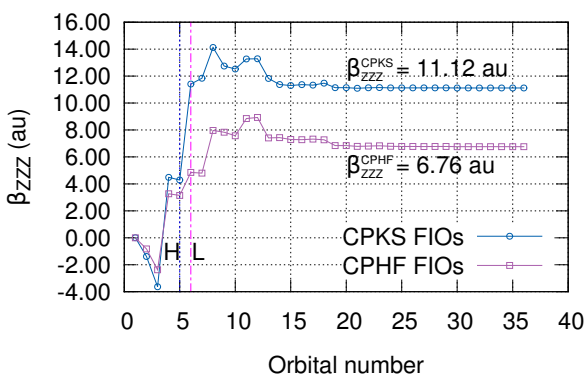

(c) CPKS- and CPHF-FIOs decomposition of  $\beta_{ZZZ}$  into MOs.

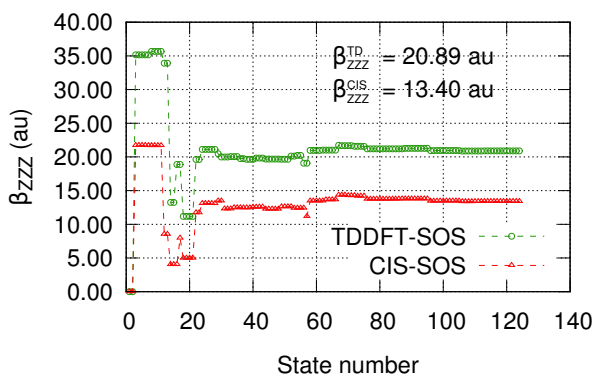

(d) TDDFT- and CIS-SOS decomposition of  $\beta_{ZZZ}$  into states.

### 7.2.2 Main contributions from different excited states at TDDFT (CAM-B3LYP) approach

| #_exc.st | ___symm___ | Exc.E  | Osc._Strength | ___f___ | _ <del>S</del> *2>_ | Singlet-B2 | 10.7886                     | 114.92  | 0.0220   | 0.000 |
|----------|------------|--------|---------------|---------|---------------------|------------|-----------------------------|---------|----------|-------|
|          |            |        |               |         |                     |            |                             |         |          |       |
|          |            |        |               |         |                     |            | max(1)=                     | 4 -> 7  | 0.69084  |       |
| 1        | Singlet-B1 | 7.0656 | 175.48        | 0.0430  | 0.000               |            | max(2)=                     | 4 -> 12 | 0.11322  |       |
|          |            |        |               |         |                     |            | max(3)=                     | 4 -> 11 | 0.09718  |       |
|          |            |        |               |         |                     |            | max(4)=                     | 3 -> 8  | 0.01419  |       |
|          |            |        |               |         |                     |            | max(5)=                     | 3 -> 15 | 0.01030  |       |
|          |            |        |               |         |                     |            | min(1)=                     | 2 -> 11 | -0.00694 |       |
|          |            |        |               |         |                     |            | min(2)=                     | 3 -> 6  | -0.00615 |       |
|          |            |        |               |         |                     |            | min(3)=                     | 2 -> 7  | -0.00548 |       |
|          |            |        |               |         |                     |            | min(4)=                     | 3 -> 19 | -0.00384 |       |
|          |            |        |               |         |                     |            | min(5)=                     | 3 -> 9  | -0.00355 |       |
|          |            |        |               |         |                     |            | #CIs=34 #CIs>0=17 #CIs<0=17 |         |          |       |
|          |            |        |               |         |                     |            | #CIs=24 #CIs>0=15 #CIs<0=9  |         |          |       |
|          |            |        |               |         | 5                   | Singlet-B1 | 11.3098                     | 109.63  | 0.0135   | 0.000 |
|          |            |        |               |         |                     |            | max(1)=                     | 5 -> 8  | 0.61707  |       |
| 2        | Singlet-A2 | 8.6960 | 142.58        | 0.0000  | 0.000               |            | max(2)=                     | 5 -> 9  | 0.31795  |       |
|          |            |        |               |         |                     |            | max(3)=                     | 5 -> 6  | 0.11232  |       |
|          |            |        |               |         |                     |            | max(4)=                     | 5 -> 15 | 0.03812  |       |
|          |            |        |               |         |                     |            | max(5)=                     | 3 -> 20 | 0.00328  |       |
|          |            |        |               |         |                     |            | min(1)=                     | 5 -> 13 | -0.05807 |       |
|          |            |        |               |         |                     |            | min(2)=                     | 5 -> 16 | -0.02629 |       |
|          |            |        |               |         |                     |            | min(3)=                     | 2 -> 10 | -0.00579 |       |
|          |            |        |               |         |                     |            | min(4)=                     | 5 -> 19 | -0.00305 |       |
|          |            |        |               |         |                     |            | min(5)=                     | 4 -> 10 | -0.00149 |       |
|          |            |        |               |         |                     |            | #CIs=25 #CIs>0=12 #CIs<0=13 |         |          |       |
|          |            |        |               |         |                     |            | #CIs=19 #CIs>0=15 #CIs<0=4  |         |          |       |
|          |            |        |               |         | 6                   | Singlet-A2 | 11.6120                     | 106.77  | 0.0000   | 0.000 |
|          |            |        |               |         |                     |            | max(1)=                     | 5 -> 11 | 0.68564  |       |
| 3        | Singlet-A1 | 9.1679 | 135.24        | 0.0909  | 0.000               |            | max(2)=                     | 5 -> 18 | 0.00691  |       |
|          |            |        |               |         |                     |            | max(3)=                     | 2 -> 20 | 0.00282  |       |
|          |            |        |               |         |                     |            | max(4)=                     | 5 -> 24 | 0.00274  |       |
|          |            |        |               |         |                     |            | max(5)=                     | 5 -> 12 | 0.00157  |       |
|          |            |        |               |         |                     |            | min(1)=                     | 5 -> 7  | -0.15347 |       |
|          |            |        |               |         |                     |            | min(2)=                     | 5 -> 14 | -0.07909 |       |
|          |            |        |               |         |                     |            | min(3)=                     | 3 -> 10 | -0.00732 |       |
|          |            |        |               |         |                     |            | min(4)=                     | 3 -> 17 | -0.00117 |       |
|          |            |        |               |         |                     |            | min(5)=                     | 5 -> 32 | -0.00044 |       |
|          |            |        |               |         |                     |            | #CIs=19 #CIs>0=14 #CIs<0=5  |         |          |       |
|          |            |        |               |         |                     |            | #CIs=42 #CIs>0=18 #CIs<0=24 |         |          |       |
|          |            |        |               |         | 7                   | Singlet-B1 | 11.8022                     | 105.05  | 0.0041   | 0.000 |
|          |            |        |               |         |                     |            | max(1)=                     | 5 -> 9  | 0.62946  |       |



|    |            |                             |         |          |       |            |         |       |                             |         |          |  |  |  |
|----|------------|-----------------------------|---------|----------|-------|------------|---------|-------|-----------------------------|---------|----------|--|--|--|
|    |            | max(2)=                     | 4 -> 10 | 0.03259  |       |            |         |       | max(4)=                     | 5 -> 8  | 0.02209  |  |  |  |
|    |            | max(3)=                     | 2 -> 10 | 0.00942  |       |            |         |       | max(5)=                     | 5 -> 6  | 0.01483  |  |  |  |
|    |            | max(4)=                     | 4 -> 22 | 0.00487  |       |            |         |       | min(1)=                     | 5 -> 9  | -0.02346 |  |  |  |
|    |            | max(5)=                     | 4 -> 17 | 0.00454  |       |            |         |       | min(2)=                     | 5 -> 15 | -0.00582 |  |  |  |
|    |            | min(1)=                     | 5 -> 8  | -0.30783 |       |            |         |       | min(3)=                     | 5 -> 16 | -0.00465 |  |  |  |
|    |            | min(2)=                     | 5 -> 6  | -0.08343 |       |            |         |       | min(4)=                     | 4 -> 22 | -0.00297 |  |  |  |
|    |            | min(3)=                     | 5 -> 15 | -0.02764 |       |            |         |       | min(5)=                     | 5 -> 25 | -0.00249 |  |  |  |
|    |            | min(4)=                     | 5 -> 21 | -0.00965 |       |            |         |       | #CIs=26 #CIs>0=14 #CIs<0=12 |         |          |  |  |  |
|    |            | min(5)=                     | 5 -> 16 | -0.00793 |       |            |         |       |                             |         |          |  |  |  |
|    |            | #CIs=25 #CIs>0=11 #CIs<0=14 |         |          | 11    | Singlet-A2 | 13.5756 | 91.33 | 0.0000                      | 0.000   |          |  |  |  |
|    |            |                             |         |          |       |            |         |       | max(1)=                     | 5 -> 12 | 0.69638  |  |  |  |
| 8  | Singlet-A1 | 12.0620                     | 102.79  | 0.0003   | 0.000 |            |         |       | max(2)=                     | 5 -> 18 | 0.03155  |  |  |  |
|    |            | max(1)=                     | 5 -> 10 | 0.65817  |       |            |         |       | max(3)=                     | 2 -> 20 | 0.00131  |  |  |  |
|    |            | max(2)=                     | 4 -> 9  | 0.16900  |       |            |         |       | max(4)=                     | 5 -> 24 | 0.00105  |  |  |  |
|    |            | max(3)=                     | 4 -> 8  | 0.14652  |       |            |         |       | max(5)=                     | 5 -> 23 | 0.00070  |  |  |  |
|    |            | max(4)=                     | 4 -> 6  | 0.06805  |       |            |         |       | min(1)=                     | 5 -> 7  | -0.11265 |  |  |  |
|    |            | max(5)=                     | 4 -> 15 | 0.01365  |       |            |         |       | min(2)=                     | 5 -> 11 | -0.02965 |  |  |  |
|    |            | min(1)=                     | 3 -> 7  | -0.07841 |       |            |         |       | min(3)=                     | 5 -> 14 | -0.02148 |  |  |  |
|    |            | min(2)=                     | 3 -> 11 | -0.04695 |       |            |         |       | min(4)=                     | 3 -> 10 | -0.00598 |  |  |  |
|    |            | min(3)=                     | 3 -> 12 | -0.04549 |       |            |         |       | min(5)=                     | 3 -> 17 | -0.00171 |  |  |  |
|    |            | min(4)=                     | 4 -> 13 | -0.03117 |       |            |         |       | #CIs=19 #CIs>0=13 #CIs<0=6  |         |          |  |  |  |
|    |            | min(5)=                     | 4 -> 16 | -0.02145 |       |            |         |       |                             |         |          |  |  |  |
|    |            | #CIs=42 #CIs>0=17 #CIs<0=25 |         |          | 12    | Singlet-A1 | 13.6771 | 90.65 | 0.0098                      | 0.000   |          |  |  |  |
|    |            |                             |         |          |       |            |         |       | max(1)=                     | 4 -> 8  | 0.62303  |  |  |  |
| 9  | Singlet-B2 | 13.0950                     | 94.68   | 0.1017   | 0.000 |            |         |       | max(2)=                     | 3 -> 7  | 0.12860  |  |  |  |
|    |            | max(1)=                     | 3 -> 6  | 0.68118  |       |            |         |       | max(3)=                     | 4 -> 6  | 0.11331  |  |  |  |
|    |            | max(2)=                     | 4 -> 7  | 0.02655  |       |            |         |       | max(4)=                     | 3 -> 11 | 0.06724  |  |  |  |
|    |            | max(3)=                     | 4 -> 14 | 0.02207  |       |            |         |       | max(5)=                     | 4 -> 15 | 0.04742  |  |  |  |
|    |            | max(4)=                     | 3 -> 16 | 0.00659  |       |            |         |       | min(1)=                     | 4 -> 9  | -0.26220 |  |  |  |
|    |            | max(5)=                     | 4 -> 12 | 0.00530  |       |            |         |       | min(2)=                     | 5 -> 10 | -0.06239 |  |  |  |
|    |            | min(1)=                     | 4 -> 11 | -0.13326 |       |            |         |       | min(3)=                     | 4 -> 13 | -0.03142 |  |  |  |
|    |            | min(2)=                     | 3 -> 8  | -0.12410 |       |            |         |       | min(4)=                     | 3 -> 14 | -0.02107 |  |  |  |
|    |            | min(3)=                     | 3 -> 13 | -0.03958 |       |            |         |       | min(5)=                     | 2 -> 6  | -0.01224 |  |  |  |
|    |            | min(4)=                     | 2 -> 14 | -0.00697 |       |            |         |       | #CIs=41 #CIs>0=26 #CIs<0=15 |         |          |  |  |  |
|    |            | min(5)=                     | 2 -> 7  | -0.00589 |       |            |         |       |                             |         |          |  |  |  |
|    |            | #CIs=35 #CIs>0=22 #CIs<0=13 |         |          | 13    | Singlet-B1 | 13.9251 | 89.04 | 0.2295                      | 0.000   |          |  |  |  |
|    |            |                             |         |          |       |            |         |       | max(1)=                     | 5 -> 13 | 0.69411  |  |  |  |
| 10 | Singlet-B1 | 13.4847                     | 91.94   | 0.0043   | 0.000 |            |         |       | max(2)=                     | 5 -> 6  | 0.04408  |  |  |  |
|    |            | max(1)=                     | 4 -> 10 | 0.69627  |       |            |         |       | max(3)=                     | 5 -> 8  | 0.04008  |  |  |  |
|    |            | max(2)=                     | 5 -> 13 | 0.11539  |       |            |         |       | max(4)=                     | 5 -> 9  | 0.03321  |  |  |  |
|    |            | max(3)=                     | 4 -> 17 | 0.02519  |       |            |         |       | max(5)=                     | 2 -> 10 | 0.00825  |  |  |  |

|    |            |                             |         |          |       |            |         |                             |         |          |
|----|------------|-----------------------------|---------|----------|-------|------------|---------|-----------------------------|---------|----------|
|    |            | min(1)=                     | 4 -> 10 | -0.11588 |       |            |         | min(3)=                     | 4 -> 9  | -0.18768 |
|    |            | min(2)=                     | 3 -> 20 | -0.00829 |       |            |         | min(4)=                     | 3 -> 11 | -0.03757 |
|    |            | min(3)=                     | 4 -> 17 | -0.00549 |       |            |         | min(5)=                     | 5 -> 17 | -0.03005 |
|    |            | min(4)=                     | 2 -> 17 | -0.00266 |       |            |         | #CIs=41 #CIs>0=12 #CIs<0=29 |         |          |
|    |            | min(5)=                     | 5 -> 16 | -0.00254 |       |            |         |                             |         |          |
|    |            | #CIs=26 #CIs>0=13 #CIs<0=13 |         |          | 17    | Singlet-B2 | 15.5247 | 79.86                       | 0.0042  | 0.000    |
| 14 | Singlet-A1 | 14.0017                     | 88.55   | 0.0329   | 0.000 |            |         | max(1)=                     | 4 -> 12 | 0.69625  |
|    |            | max(1)=                     | 4 -> 9  | 0.58843  |       |            |         | max(2)=                     | 4 -> 18 | 0.03145  |
|    |            | max(2)=                     | 3 -> 7  | 0.30091  |       |            |         | max(3)=                     | 3 -> 9  | 0.01360  |
|    |            | max(3)=                     | 4 -> 8  | 0.16055  |       |            |         | max(4)=                     | 4 -> 11 | 0.00900  |
|    |            | max(4)=                     | 3 -> 11 | 0.10152  |       |            |         | max(5)=                     | 2 -> 14 | 0.00268  |
|    |            | max(5)=                     | 3 -> 12 | 0.08715  |       |            |         | min(1)=                     | 4 -> 7  | -0.11596 |
|    |            | min(1)=                     | 5 -> 10 | -0.13441 |       |            |         | min(2)=                     | 4 -> 14 | -0.01951 |
|    |            | min(2)=                     | 4 -> 6  | -0.02044 |       |            |         | min(3)=                     | 3 -> 13 | -0.01010 |
|    |            | min(3)=                     | 3 -> 14 | -0.01773 |       |            |         | min(4)=                     | 2 -> 11 | -0.00717 |
|    |            | min(4)=                     | 4 -> 15 | -0.00766 |       |            |         | min(5)=                     | 3 -> 19 | -0.00186 |
|    |            | min(5)=                     | 2 -> 6  | -0.00742 |       |            |         | #CIs=35 #CIs>0=20 #CIs<0=15 |         |          |
|    |            | #CIs=43 #CIs>0=25 #CIs<0=18 |         |          | 18    | Singlet-A1 | 15.8050 | 78.45                       | 0.0187  | 0.000    |
| 15 | Singlet-B2 | 14.0754                     | 88.09   | 0.1941   | 0.000 |            |         | max(1)=                     | 4 -> 13 | 0.64318  |
|    |            | max(1)=                     | 4 -> 11 | 0.68254  |       |            |         | max(2)=                     | 3 -> 7  | 0.24176  |
|    |            | max(2)=                     | 3 -> 6  | 0.14328  |       |            |         | max(3)=                     | 5 -> 10 | 0.08461  |
|    |            | max(3)=                     | 3 -> 8  | 0.03412  |       |            |         | max(4)=                     | 4 -> 6  | 0.05523  |
|    |            | max(4)=                     | 3 -> 15 | 0.03244  |       |            |         | max(5)=                     | 3 -> 14 | 0.01957  |
|    |            | max(5)=                     | 5 -> 20 | 0.01551  |       |            |         | min(1)=                     | 4 -> 9  | -0.10020 |
|    |            | min(1)=                     | 4 -> 7  | -0.09217 |       |            |         | min(2)=                     | 4 -> 8  | -0.05266 |
|    |            | min(2)=                     | 4 -> 14 | -0.02779 |       |            |         | min(3)=                     | 3 -> 12 | -0.04434 |
|    |            | min(3)=                     | 3 -> 13 | -0.02701 |       |            |         | min(4)=                     | 3 -> 11 | -0.04188 |
|    |            | min(4)=                     | 4 -> 12 | -0.02574 |       |            |         | min(5)=                     | 4 -> 16 | -0.02236 |
|    |            | min(5)=                     | 3 -> 9  | -0.02356 |       |            |         | #CIs=43 #CIs>0=17 #CIs<0=26 |         |          |
|    |            | #CIs=35 #CIs>0=17 #CIs<0=18 |         |          | 19    | Singlet-B2 | 17.4650 | 70.99                       | 0.0202  | 0.000    |
| 16 | Singlet-A1 | 15.4623                     | 80.18   | 0.0190   | 0.000 |            |         | max(1)=                     | 3 -> 8  | 0.55587  |
|    |            | max(1)=                     | 3 -> 7  | 0.57066  |       |            |         | max(2)=                     | 3 -> 9  | 0.42179  |
|    |            | max(2)=                     | 5 -> 10 | 0.14238  |       |            |         | max(3)=                     | 3 -> 6  | 0.08974  |
|    |            | max(3)=                     | 3 -> 14 | 0.02853  |       |            |         | max(4)=                     | 3 -> 15 | 0.02027  |
|    |            | max(4)=                     | 4 -> 15 | 0.01668  |       |            |         | max(5)=                     | 2 -> 11 | 0.00993  |
|    |            | max(5)=                     | 2 -> 6  | 0.00983  |       |            |         | min(1)=                     | 3 -> 13 | -0.04292 |
|    |            | min(1)=                     | 4 -> 13 | -0.28149 |       |            |         | min(2)=                     | 4 -> 11 | -0.03631 |
|    |            | min(2)=                     | 4 -> 8  | -0.18966 |       |            |         | min(3)=                     | 3 -> 16 | -0.02610 |
|    |            |                             |         |          |       |            |         | min(4)=                     | 4 -> 14 | -0.02418 |

|    |            |         |         |           |           |       |            |         |         |              |           |
|----|------------|---------|---------|-----------|-----------|-------|------------|---------|---------|--------------|-----------|
|    |            |         | min(5)= | 4 -> 12   | -0.01091  |       |            |         |         |              |           |
|    |            |         | #CIs=35 | #CIs>0=14 | #CIs<0=21 | 23    | Singlet-B2 | 19.6757 | 63.01   | 0.0093 0.000 |           |
|    |            |         |         |           |           |       |            | max(1)= | 3 -> 13 | 0.70202      |           |
| 20 | Singlet-A2 | 17.5250 |         | 70.75     | 0.0000    | 0.000 |            |         | max(2)= | 3 -> 6       | 0.04877   |
|    |            |         | max(1)= | 3 -> 10   | 0.70641   |       |            |         | max(3)= | 4 -> 14      | 0.04441   |
|    |            |         | max(2)= | 3 -> 17   | 0.02690   |       |            |         | max(4)= | 3 -> 8       | 0.03327   |
|    |            |         | max(3)= | 5 -> 14   | 0.01239   |       |            |         | max(5)= | 3 -> 9       | 0.02172   |
|    |            |         | max(4)= | 5 -> 11   | 0.00898   |       |            |         | min(1)= | 2 -> 7       | -0.01917  |
|    |            |         | max(5)= | 5 -> 12   | 0.00697   |       |            |         | min(2)= | 2 -> 11      | -0.01135  |
|    |            |         | min(1)= | 5 -> 18   | -0.00213  |       |            |         | min(3)= | 3 -> 16      | -0.00612  |
|    |            |         | min(2)= | 5 -> 24   | -0.00087  |       |            |         | min(4)= | 3 -> 15      | -0.00505  |
|    |            |         | min(3)= | 4 -> 20   | -0.00015  |       |            |         | min(5)= | 4 -> 24      | -0.00454  |
|    |            |         | min(4)= | 5 -> 32   | 0.00008   |       |            |         | #CIs=36 | #CIs>0=22    | #CIs<0=14 |
|    |            |         | min(5)= | 5 -> 23   | 0.00010   |       |            |         |         |              |           |
|    |            |         | #CIs=18 | #CIs>0=15 | #CIs<0=3  | 24    | Singlet-A1 | 20.4158 | 60.73   | 0.0023 0.000 |           |
|    |            |         |         |           |           |       |            | max(1)= | 3 -> 12 | 0.66605      |           |
| 21 | Singlet-B2 | 18.0920 |         | 68.53     | 0.2259    | 0.000 |            |         | max(2)= | 3 -> 11      | 0.15716   |
|    |            |         | max(1)= | 3 -> 9    | 0.56528   |       |            |         | max(3)= | 5 -> 10      | 0.08316   |
|    |            |         | max(2)= | 4 -> 11   | 0.05752   |       |            |         | max(4)= | 4 -> 15      | 0.05918   |
|    |            |         | max(3)= | 4 -> 14   | 0.04931   |       |            |         | max(5)= | 2 -> 6       | 0.04360   |
|    |            |         | max(4)= | 5 -> 20   | 0.01222   |       |            |         | min(1)= | 4 -> 8       | -0.07218  |
|    |            |         | max(5)= | 4 -> 18   | 0.00590   |       |            |         | min(2)= | 4 -> 9       | -0.06693  |
|    |            |         | min(1)= | 3 -> 8    | -0.41187  |       |            |         | min(3)= | 5 -> 17      | -0.06213  |
|    |            |         | min(2)= | 3 -> 6    | -0.06941  |       |            |         | min(4)= | 4 -> 16      | -0.04766  |
|    |            |         | min(3)= | 2 -> 14   | -0.00990  |       |            |         | min(5)= | 3 -> 7       | -0.03684  |
|    |            |         | min(4)= | 3 -> 15   | -0.00868  |       |            |         | #CIs=43 | #CIs>0=17    | #CIs<0=26 |
|    |            |         | min(5)= | 4 -> 12   | -0.00862  |       |            |         |         |              |           |
|    |            |         | #CIs=36 | #CIs>0=19 | #CIs<0=17 | 25    | Singlet-A2 | 20.6769 | 59.96   | 0.0000 0.000 |           |
|    |            |         |         |           |           |       |            | max(1)= | 5 -> 14 | 0.70166      |           |
| 22 | Singlet-A1 | 18.4329 |         | 67.26     | 0.1931    | 0.000 |            |         | max(2)= | 5 -> 11      | 0.08102   |
|    |            |         | max(1)= | 3 -> 11   | 0.66976   |       |            |         | max(3)= | 5 -> 12      | 0.02532   |
|    |            |         | max(2)= | 5 -> 10   | 0.05992   |       |            |         | max(4)= | 5 -> 27      | 0.00207   |
|    |            |         | max(3)= | 4 -> 15   | 0.03792   |       |            |         | max(5)= | 5 -> 7       | 0.00089   |
|    |            |         | max(4)= | 2 -> 9    | 0.02021   |       |            |         | min(1)= | 5 -> 24      | -0.01531  |
|    |            |         | max(5)= | 4 -> 6    | 0.01630   |       |            |         | min(2)= | 3 -> 10      | -0.01361  |
|    |            |         | min(1)= | 3 -> 12   | -0.18873  |       |            |         | min(3)= | 5 -> 23      | -0.00462  |
|    |            |         | min(2)= | 4 -> 8    | -0.07682  |       |            |         | min(4)= | 2 -> 20      | -0.00418  |
|    |            |         | min(3)= | 4 -> 9    | -0.04611  |       |            |         | min(5)= | 5 -> 18      | -0.00409  |
|    |            |         | min(4)= | 5 -> 17   | -0.03060  |       |            |         | #CIs=19 | #CIs>0=7     | #CIs<0=12 |
|    |            |         | min(5)= | 4 -> 16   | -0.02777  |       |            |         |         |              |           |
|    |            |         | #CIs=42 | #CIs>0=17 | #CIs<0=25 | 26    | Singlet-B1 | 22.2915 | 55.62   | 0.0437 0.000 |           |

|    |            |                             |         |          |       |            |         |                             |         |          |  |  |
|----|------------|-----------------------------|---------|----------|-------|------------|---------|-----------------------------|---------|----------|--|--|
|    |            | max(1)=                     | 5 -> 15 | 0.70375  |       |            |         | max(3)=                     | 4 -> 15 | 0.05628  |  |  |
|    |            | max(2)=                     | 3 -> 20 | 0.01885  |       |            |         | max(4)=                     | 3 -> 18 | 0.03052  |  |  |
|    |            | max(3)=                     | 5 -> 21 | 0.01033  |       |            |         | max(5)=                     | 4 -> 16 | 0.02993  |  |  |
|    |            | max(4)=                     | 5 -> 9  | 0.00756  |       |            |         | min(1)=                     | 3 -> 14 | -0.13429 |  |  |
|    |            | max(5)=                     | 4 -> 28 | 0.00736  |       |            |         | min(2)=                     | 2 -> 8  | -0.07799 |  |  |
|    |            | min(1)=                     | 5 -> 8  | -0.04895 |       |            |         | min(3)=                     | 3 -> 12 | -0.03442 |  |  |
|    |            | min(2)=                     | 2 -> 10 | -0.02729 |       |            |         | min(4)=                     | 2 -> 13 | -0.03160 |  |  |
|    |            | min(3)=                     | 5 -> 16 | -0.02487 |       |            |         | min(5)=                     | 3 -> 11 | -0.02429 |  |  |
|    |            | min(4)=                     | 4 -> 22 | -0.01332 |       |            |         | #CIs=42 #CIs>0=23 #CIs<0=19 |         |          |  |  |
|    |            | min(5)=                     | 5 -> 19 | -0.01326 |       |            |         |                             |         |          |  |  |
|    |            | #CIs=26 #CIs>0=13 #CIs<0=13 |         |          | 30    | Singlet-A1 | 28.0269 | 44.24                       | 0.1489  | 0.000    |  |  |
|    |            |                             |         |          |       |            |         | max(1)=                     | 3 -> 14 | 0.67325  |  |  |
| 27 | Singlet-B2 | 23.5321                     | 52.69   | 0.0937   | 0.000 |            |         | max(2)=                     | 2 -> 6  | 0.11931  |  |  |
|    |            | max(1)=                     | 4 -> 14 | 0.69115  |       |            |         | max(3)=                     | 5 -> 17 | 0.09799  |  |  |
|    |            | max(2)=                     | 3 -> 8  | 0.05384  |       |            |         | max(4)=                     | 4 -> 15 | 0.08717  |  |  |
|    |            | max(3)=                     | 4 -> 11 | 0.03163  |       |            |         | max(5)=                     | 4 -> 16 | 0.08316  |  |  |
|    |            | max(4)=                     | 2 -> 7  | 0.02634  |       |            |         | min(1)=                     | 2 -> 9  | -0.05739 |  |  |
|    |            | max(5)=                     | 2 -> 12 | 0.02287  |       |            |         | min(2)=                     | 4 -> 19 | -0.03710 |  |  |
|    |            | min(1)=                     | 3 -> 15 | -0.11070 |       |            |         | min(3)=                     | 5 -> 10 | -0.02311 |  |  |
|    |            | min(2)=                     | 3 -> 13 | -0.04548 |       |            |         | min(4)=                     | 3 -> 7  | -0.01165 |  |  |
|    |            | min(3)=                     | 5 -> 20 | -0.03452 |       |            |         | min(5)=                     | 4 -> 6  | -0.01067 |  |  |
|    |            | min(4)=                     | 3 -> 9  | -0.02616 |       |            |         | #CIs=42 #CIs>0=27 #CIs<0=15 |         |          |  |  |
|    |            | min(5)=                     | 4 -> 18 | -0.01290 |       |            |         |                             |         |          |  |  |
|    |            | #CIs=36 #CIs>0=17 #CIs<0=19 |         |          | 31    | Singlet-B2 | 28.1815 | 43.99                       | 0.0104  | 0.000    |  |  |
|    |            |                             |         |          |       |            |         | max(1)=                     | 2 -> 7  | 0.69014  |  |  |
| 28 | Singlet-A1 | 24.2153                     | 51.20   | 0.0000   | 0.000 |            |         | max(2)=                     | 2 -> 11 | 0.11997  |  |  |
|    |            | max(1)=                     | 4 -> 15 | 0.69087  |       |            |         | max(3)=                     | 2 -> 12 | 0.08383  |  |  |
|    |            | max(2)=                     | 2 -> 8  | 0.04154  |       |            |         | max(4)=                     | 3 -> 13 | 0.02229  |  |  |
|    |            | max(3)=                     | 5 -> 17 | 0.02851  |       |            |         | max(5)=                     | 5 -> 20 | 0.01823  |  |  |
|    |            | max(4)=                     | 4 -> 9  | 0.02817  |       |            |         | min(1)=                     | 4 -> 14 | -0.02827 |  |  |
|    |            | max(5)=                     | 4 -> 16 | 0.01398  |       |            |         | min(2)=                     | 3 -> 19 | -0.01307 |  |  |
|    |            | min(1)=                     | 3 -> 14 | -0.08550 |       |            |         | min(3)=                     | 4 -> 24 | -0.00683 |  |  |
|    |            | min(2)=                     | 2 -> 6  | -0.07527 |       |            |         | min(4)=                     | 2 -> 14 | -0.00596 |  |  |
|    |            | min(3)=                     | 3 -> 11 | -0.04622 |       |            |         | min(5)=                     | 3 -> 21 | -0.00495 |  |  |
|    |            | min(4)=                     | 4 -> 8  | -0.03836 |       |            |         | #CIs=35 #CIs>0=20 #CIs<0=15 |         |          |  |  |
|    |            | min(5)=                     | 3 -> 12 | -0.03810 |       |            |         |                             |         |          |  |  |
|    |            | #CIs=43 #CIs>0=20 #CIs<0=23 |         |          | 32    | Singlet-B2 | 29.1611 | 42.52                       | 0.2181  | 0.000    |  |  |
|    |            |                             |         |          |       |            |         | max(1)=                     | 3 -> 15 | 0.69228  |  |  |
| 29 | Singlet-A1 | 26.6660                     | 46.50   | 0.0018   | 0.000 |            |         | max(2)=                     | 4 -> 14 | 0.10962  |  |  |
|    |            | max(1)=                     | 2 -> 6  | 0.68062  |       |            |         | max(3)=                     | 3 -> 19 | 0.01872  |  |  |
|    |            | max(2)=                     | 5 -> 17 | 0.06049  |       |            |         | max(4)=                     | 2 -> 14 | 0.01758  |  |  |

|    |            |         |         |           |           |    |                             |         |          |        |       |
|----|------------|---------|---------|-----------|-----------|----|-----------------------------|---------|----------|--------|-------|
|    |            |         | max(5)= | 2 -> 12   | 0.01287   |    | min(2)=                     | 2 -> 14 | -0.05116 |        |       |
|    |            |         | min(1)= | 5 -> 20   | -0.06585  |    | min(3)=                     | 2 -> 12 | -0.02835 |        |       |
|    |            |         | min(2)= | 2 -> 11   | -0.03616  |    | min(4)=                     | 3 -> 9  | -0.01142 |        |       |
|    |            |         | min(3)= | 3 -> 16   | -0.03299  |    | min(5)=                     | 3 -> 19 | -0.01000 |        |       |
|    |            |         | min(4)= | 4 -> 18   | -0.02836  |    | #CIs=36 #CIs>0=16 #CIs<0=20 |         |          |        |       |
|    |            |         | min(5)= | 4 -> 11   | -0.02567  |    |                             |         |          |        |       |
|    |            |         | #CIs=36 | #CIs>0=16 | #CIs<0=20 | 36 | Singlet-A1                  | 31.2155 | 39.72    | 0.0052 | 0.000 |
|    |            |         |         |           |           |    | max(1)=                     | 2 -> 8  | 0.48330  |        |       |
| 33 | Singlet-A1 | 31.0251 | 39.96   | 0.0189    | 0.000     |    | max(2)=                     | 2 -> 6  | 0.07753  |        |       |
|    |            |         | max(1)= | 2 -> 9    | 0.50775   |    | max(3)=                     | 2 -> 15 | 0.03221  |        |       |
|    |            |         | max(2)= | 2 -> 8    | 0.48135   |    | max(4)=                     | 5 -> 10 | 0.02209  |        |       |
|    |            |         | max(3)= | 2 -> 6    | 0.04451   |    | max(5)=                     | 2 -> 16 | 0.00798  |        |       |
|    |            |         | max(4)= | 3 -> 14   | 0.02177   |    | min(1)=                     | 2 -> 9  | -0.48189 |        |       |
|    |            |         | max(5)= | 4 -> 21   | 0.02010   |    | min(2)=                     | 5 -> 17 | -0.12505 |        |       |
|    |            |         | min(1)= | 2 -> 13   | -0.06626  |    | min(3)=                     | 2 -> 13 | -0.06967 |        |       |
|    |            |         | min(2)= | 5 -> 17   | -0.03361  |    | min(4)=                     | 4 -> 16 | -0.05388 |        |       |
|    |            |         | min(3)= | 3 -> 18   | -0.01986  |    | min(5)=                     | 3 -> 14 | -0.04433 |        |       |
|    |            |         | min(4)= | 4 -> 19   | -0.01932  |    | #CIs=42 #CIs>0=17 #CIs<0=25 |         |          |        |       |
|    |            |         | min(5)= | 2 -> 16   | -0.01669  |    |                             |         |          |        |       |
|    |            |         | #CIs=41 | #CIs>0=19 | #CIs<0=22 | 37 | Singlet-B1                  | 32.4479 | 38.21    | 0.0142 | 0.000 |
|    |            |         |         |           |           |    | max(1)=                     | 5 -> 16 | 0.70243  |        |       |
| 34 | Singlet-B1 | 31.0404 | 39.94   | 0.0142    | 0.000     |    | max(2)=                     | 2 -> 10 | 0.05137  |        |       |
|    |            |         | max(1)= | 2 -> 10   | 0.70335   |    | max(3)=                     | 5 -> 15 | 0.02635  |        |       |
|    |            |         | max(2)= | 5 -> 15   | 0.02498   |    | max(4)=                     | 5 -> 21 | 0.02185  |        |       |
|    |            |         | max(3)= | 2 -> 17   | 0.01805   |    | max(5)=                     | 5 -> 8  | 0.01975  |        |       |
|    |            |         | max(4)= | 3 -> 20   | 0.01732   |    | min(1)=                     | 4 -> 17 | -0.03193 |        |       |
|    |            |         | max(5)= | 4 -> 28   | 0.00653   |    | min(2)=                     | 4 -> 22 | -0.01620 |        |       |
|    |            |         | min(1)= | 5 -> 16   | -0.05427  |    | min(3)=                     | 5 -> 19 | -0.01409 |        |       |
|    |            |         | min(2)= | 4 -> 17   | -0.01899  |    | min(4)=                     | 5 -> 25 | -0.01100 |        |       |
|    |            |         | min(3)= | 5 -> 19   | -0.01674  |    | min(5)=                     | 5 -> 6  | -0.00410 |        |       |
|    |            |         | min(4)= | 4 -> 22   | -0.01368  |    | #CIs=26 #CIs>0=16 #CIs<0=10 |         |          |        |       |
|    |            |         | min(5)= | 5 -> 25   | -0.01011  |    |                             |         |          |        |       |
|    |            |         | #CIs=26 | #CIs>0=14 | #CIs<0=12 | 38 | Singlet-A1                  | 33.0038 | 37.57    | 0.0017 | 0.000 |
|    |            |         |         |           |           |    | max(1)=                     | 2 -> 13 | 0.68721  |        |       |
| 35 | Singlet-B2 | 31.1819 | 39.76   | 0.0149    | 0.000     |    | max(2)=                     | 2 -> 8  | 0.06590  |        |       |
|    |            |         | max(1)= | 2 -> 11   | 0.69297   |    | max(3)=                     | 2 -> 6  | 0.05231  |        |       |
|    |            |         | max(2)= | 3 -> 15   | 0.04061   |    | max(4)=                     | 2 -> 9  | 0.01416  |        |       |
|    |            |         | max(3)= | 3 -> 13   | 0.00939   |    | max(5)=                     | 2 -> 21 | 0.01130  |        |       |
|    |            |         | max(4)= | 4 -> 12   | 0.00818   |    | min(1)=                     | 5 -> 17 | -0.13902 |        |       |
|    |            |         | max(5)= | 3 -> 16   | 0.00701   |    | min(2)=                     | 4 -> 16 | -0.02383 |        |       |
|    |            |         | min(1)= | 2 -> 7    | -0.11893  |    | min(3)=                     | 2 -> 15 | -0.01242 |        |       |

|    |            |         |       |                             |         |          |    |                             |                             |       |          |       |  |
|----|------------|---------|-------|-----------------------------|---------|----------|----|-----------------------------|-----------------------------|-------|----------|-------|--|
|    |            |         |       | min(4)=                     | 2 -> 16 | -0.00477 |    |                             | #CIs=42 #CIs>0=25 #CIs<0=17 |       |          |       |  |
|    |            |         |       | min(5)=                     | 3 -> 14 | -0.00464 |    |                             |                             |       |          |       |  |
|    |            |         |       | #CIs=41 #CIs>0=23 #CIs<0=18 |         |          | 42 | Singlet-B1                  | 35.4521                     | 34.97 | 0.0039   | 0.000 |  |
|    |            |         |       |                             |         |          |    | max(1)=                     | 4 -> 17                     |       | 0.70538  |       |  |
| 39 | Singlet-B2 | 33.1201 | 37.43 | 0.0247                      | 0.000   |          |    | max(2)=                     | 5 -> 16                     |       | 0.02975  |       |  |
|    |            |         |       | max(1)=                     | 2 -> 12 | 0.69911  |    | max(3)=                     | 2 -> 10                     |       | 0.02052  |       |  |
|    |            |         |       | max(2)=                     | 5 -> 20 | 0.02937  |    | max(4)=                     | 3 -> 20                     |       | 0.00947  |       |  |
|    |            |         |       | max(3)=                     | 3 -> 16 | 0.02180  |    | max(5)=                     | 5 -> 15                     |       | 0.00740  |       |  |
|    |            |         |       | max(4)=                     | 2 -> 18 | 0.02088  |    | min(1)=                     | 4 -> 10                     |       | -0.02562 |       |  |
|    |            |         |       | max(5)=                     | 4 -> 18 | 0.01152  |    | min(2)=                     | 5 -> 19                     |       | -0.01421 |       |  |
|    |            |         |       | min(1)=                     | 2 -> 7  | -0.08959 |    | min(3)=                     | 5 -> 25                     |       | -0.00616 |       |  |
|    |            |         |       | min(2)=                     | 3 -> 19 | -0.01843 |    | min(4)=                     | 4 -> 22                     |       | -0.00592 |       |  |
|    |            |         |       | min(3)=                     | 4 -> 14 | -0.01818 |    | min(5)=                     | 2 -> 17                     |       | -0.00464 |       |  |
|    |            |         |       | min(4)=                     | 2 -> 14 | -0.01467 |    | #CIs=26 #CIs>0=13 #CIs<0=13 |                             |       |          |       |  |
|    |            |         |       | min(5)=                     | 3 -> 21 | -0.00984 |    |                             |                             |       |          |       |  |
|    |            |         |       | #CIs=36 #CIs>0=19 #CIs<0=17 |         |          | 43 | Singlet-B2                  | 35.7803                     | 34.65 | 0.0613   | 0.000 |  |
|    |            |         |       |                             |         |          |    | max(1)=                     | 4 -> 18                     |       | 0.70366  |       |  |
| 40 | Singlet-A2 | 33.7225 | 36.77 | 0.0000                      | 0.000   |          |    | max(2)=                     | 2 -> 14                     |       | 0.02139  |       |  |
|    |            |         |       | max(1)=                     | 5 -> 18 | 0.70618  |    | max(3)=                     | 3 -> 15                     |       | 0.02050  |       |  |
|    |            |         |       | max(2)=                     | 5 -> 24 | 0.00677  |    | max(4)=                     | 4 -> 14                     |       | 0.01553  |       |  |
|    |            |         |       | max(3)=                     | 5 -> 14 | 0.00629  |    | max(5)=                     | 3 -> 19                     |       | 0.01126  |       |  |
|    |            |         |       | max(4)=                     | 4 -> 20 | 0.00435  |    | min(1)=                     | 5 -> 20                     |       | -0.03337 |       |  |
|    |            |         |       | max(5)=                     | 5 -> 35 | 0.00314  |    | min(2)=                     | 3 -> 16                     |       | -0.03210 |       |  |
|    |            |         |       | min(1)=                     | 5 -> 12 | -0.03253 |    | min(3)=                     | 4 -> 12                     |       | -0.03179 |       |  |
|    |            |         |       | min(2)=                     | 5 -> 11 | -0.00695 |    | min(4)=                     | 4 -> 11                     |       | -0.01158 |       |  |
|    |            |         |       | min(3)=                     | 5 -> 32 | -0.00639 |    | min(5)=                     | 3 -> 21                     |       | -0.00842 |       |  |
|    |            |         |       | min(4)=                     | 3 -> 17 | -0.00615 |    | #CIs=36 #CIs>0=14 #CIs<0=22 |                             |       |          |       |  |
|    |            |         |       | min(5)=                     | 5 -> 7  | -0.00278 |    |                             |                             |       |          |       |  |
|    |            |         |       | #CIs=18 #CIs>0=9 #CIs<0=9   |         |          | 44 | Singlet-A1                  | 37.5457                     | 33.02 | 0.0323   | 0.000 |  |
|    |            |         |       |                             |         |          |    | max(1)=                     | 4 -> 16                     |       | 0.41222  |       |  |
| 41 | Singlet-A1 | 34.0157 | 36.45 | 0.0040                      | 0.000   |          |    | max(2)=                     | 5 -> 17                     |       | 0.35178  |       |  |
|    |            |         |       | max(1)=                     | 4 -> 16 | 0.49937  |    | max(3)=                     | 2 -> 8                      |       | 0.07722  |       |  |
|    |            |         |       | max(2)=                     | 3 -> 18 | 0.04544  |    | max(4)=                     | 2 -> 13                     |       | 0.07503  |       |  |
|    |            |         |       | max(3)=                     | 2 -> 15 | 0.02644  |    | max(5)=                     | 3 -> 12                     |       | 0.05513  |       |  |
|    |            |         |       | max(4)=                     | 4 -> 9  | 0.01845  |    | min(1)=                     | 3 -> 18                     |       | -0.39272 |       |  |
|    |            |         |       | max(5)=                     | 4 -> 19 | 0.01842  |    | min(2)=                     | 2 -> 15                     |       | -0.12480 |       |  |
|    |            |         |       | min(1)=                     | 5 -> 17 | -0.48584 |    | min(3)=                     | 3 -> 14                     |       | -0.08672 |       |  |
|    |            |         |       | min(2)=                     | 2 -> 13 | -0.07454 |    | min(4)=                     | 4 -> 21                     |       | -0.08143 |       |  |
|    |            |         |       | min(3)=                     | 2 -> 8  | -0.06545 |    | min(5)=                     | 2 -> 9                      |       | -0.05149 |       |  |
|    |            |         |       | min(4)=                     | 3 -> 12 | -0.01306 |    | #CIs=43 #CIs>0=20 #CIs<0=23 |                             |       |          |       |  |
|    |            |         |       | min(5)=                     | 5 -> 22 | -0.00944 |    |                             |                             |       |          |       |  |

|    |            |                             |         |          |       |            |                             |          |        |       |
|----|------------|-----------------------------|---------|----------|-------|------------|-----------------------------|----------|--------|-------|
| 45 | Singlet-B2 | 38.5945                     | 32.12   | 0.0351   | 0.000 | max(2)=    | 5 -> 20                     | 0.12263  |        |       |
|    |            | max(1)=                     | 3 -> 16 | 0.69627  |       | max(3)=    | 2 -> 11                     | 0.05122  |        |       |
|    |            | max(2)=                     | 2 -> 14 | 0.04436  |       | max(4)=    | 3 -> 19                     | 0.03177  |        |       |
|    |            | max(3)=                     | 4 -> 18 | 0.02423  |       | max(5)=    | 3 -> 21                     | 0.01376  |        |       |
|    |            | max(4)=                     | 3 -> 15 | 0.02209  |       | min(1)=    | 3 -> 16                     | -0.02499 |        |       |
|    |            | max(5)=                     | 3 -> 9  | 0.01842  |       | min(2)=    | 4 -> 18                     | -0.01663 |        |       |
|    |            | min(1)=                     | 5 -> 20 | -0.10355 |       | min(3)=    | 4 -> 23                     | -0.00809 |        |       |
|    |            | min(2)=                     | 2 -> 12 | -0.01691 |       | min(4)=    | 3 -> 8                      | -0.00765 |        |       |
|    |            | min(3)=                     | 3 -> 25 | -0.00895 |       | min(5)=    | 3 -> 15                     | -0.00739 |        |       |
|    |            | min(4)=                     | 5 -> 29 | -0.00581 |       |            | #CIs=36 #CIs>0=20 #CIs<0=16 |          |        |       |
|    |            | min(5)=                     | 2 -> 11 | -0.00513 |       |            |                             |          |        |       |
|    |            | #CIs=35 #CIs>0=21 #CIs<0=14 |         |          | 49    | Singlet-A1 | 41.2289                     | 30.07    | 0.0012 | 0.000 |
|    |            |                             |         |          |       | max(1)=    | 2 -> 15                     | 0.56383  |        |       |
| 46 | Singlet-A2 | 39.4993                     | 31.39   | 0.0000   | 0.000 | max(2)=    | 4 -> 19                     | 0.11671  |        |       |
|    |            | max(1)=                     | 3 -> 17 | 0.70647  |       | max(3)=    | 4 -> 21                     | 0.09107  |        |       |
|    |            | max(2)=                     | 4 -> 20 | 0.00927  |       | max(4)=    | 2 -> 9                      | 0.02576  |        |       |
|    |            | max(3)=                     | 5 -> 18 | 0.00629  |       | max(5)=    | 3 -> 14                     | 0.02202  |        |       |
|    |            | max(4)=                     | 3 -> 33 | 0.00532  |       | min(1)=    | 3 -> 18                     | -0.37659 |        |       |
|    |            | max(5)=                     | 2 -> 20 | 0.00429  |       | min(2)=    | 4 -> 16                     | -0.08335 |        |       |
|    |            | min(1)=                     | 3 -> 10 | -0.02688 |       | min(3)=    | 5 -> 17                     | -0.07448 |        |       |
|    |            | min(2)=                     | 5 -> 14 | -0.00138 |       | min(4)=    | 2 -> 8                      | -0.05965 |        |       |
|    |            | min(3)=                     | 5 -> 24 | -0.00136 |       | min(5)=    | 2 -> 16                     | -0.01841 |        |       |
|    |            | min(4)=                     | 2 -> 29 | -0.00080 |       |            | #CIs=43 #CIs>0=21 #CIs<0=22 |          |        |       |
|    |            | min(5)=                     | 5 -> 27 | -0.00069 |       |            |                             |          |        |       |
|    |            | #CIs=18 #CIs>0=11 #CIs<0=7  |         |          | 50    | Singlet-B2 | 41.7194                     | 29.72    | 0.5302 | 0.000 |
|    |            |                             |         |          |       | max(1)=    | 5 -> 20                     | 0.67217  |        |       |
| 47 | Singlet-B1 | 40.1338                     | 30.89   | 0.0075   | 0.000 | max(2)=    | 3 -> 19                     | 0.11765  |        |       |
|    |            | max(1)=                     | 5 -> 19 | 0.70576  |       | max(3)=    | 3 -> 16                     | 0.10033  |        |       |
|    |            | max(2)=                     | 3 -> 20 | 0.02474  |       | max(4)=    | 3 -> 15                     | 0.06251  |        |       |
|    |            | max(3)=                     | 2 -> 10 | 0.01663  |       | max(5)=    | 4 -> 14                     | 0.04309  |        |       |
|    |            | max(4)=                     | 5 -> 15 | 0.01360  |       | min(1)=    | 2 -> 14                     | -0.11772 |        |       |
|    |            | max(5)=                     | 4 -> 17 | 0.01259  |       | min(2)=    | 2 -> 12                     | -0.03085 |        |       |
|    |            | min(1)=                     | 4 -> 22 | -0.01680 |       | min(3)=    | 3 -> 25                     | -0.02362 |        |       |
|    |            | min(2)=                     | 2 -> 17 | -0.00763 |       | min(4)=    | 2 -> 11                     | -0.01857 |        |       |
|    |            | min(3)=                     | 5 -> 13 | -0.00665 |       | min(5)=    | 4 -> 11                     | -0.01815 |        |       |
|    |            | min(4)=                     | 5 -> 25 | -0.00662 |       |            | #CIs=36 #CIs>0=18 #CIs<0=18 |          |        |       |
|    |            | min(5)=                     | 5 -> 21 | -0.00489 |       |            |                             |          |        |       |
|    |            | #CIs=26 #CIs>0=16 #CIs<0=10 |         |          | 51    | Singlet-A2 | 42.6302                     | 29.08    | 0.0000 | 0.000 |
|    |            |                             |         |          |       | max(1)=    | 4 -> 20                     | 0.70696  |        |       |
| 48 | Singlet-B2 | 40.4690                     | 30.64   | 0.0014   | 0.000 | max(2)=    | 4 -> 29                     | 0.00786  |        |       |
|    |            | max(1)=                     | 2 -> 14 | 0.69266  |       | max(3)=    | 3 -> 22                     | 0.00383  |        |       |

|    |            |         |       |                             |         |          |    |            |         |                             |         |          |  |  |  |
|----|------------|---------|-------|-----------------------------|---------|----------|----|------------|---------|-----------------------------|---------|----------|--|--|--|
|    |            |         |       | max(4)=                     | 5 -> 27 | 0.00372  |    |            |         | min(1)=                     | 4 -> 19 | -0.32640 |  |  |  |
|    |            |         |       | max(5)=                     | 2 -> 29 | 0.00263  |    |            |         | min(2)=                     | 3 -> 18 | -0.28620 |  |  |  |
|    |            |         |       | min(1)=                     | 3 -> 17 | -0.00923 |    |            |         | min(3)=                     | 2 -> 15 | -0.23623 |  |  |  |
|    |            |         |       | min(2)=                     | 5 -> 18 | -0.00446 |    |            |         | min(4)=                     | 5 -> 22 | -0.19379 |  |  |  |
|    |            |         |       | min(3)=                     | 2 -> 20 | -0.00364 |    |            |         | min(5)=                     | 5 -> 17 | -0.14837 |  |  |  |
|    |            |         |       | min(4)=                     | 3 -> 28 | -0.00089 |    |            |         | #CIs=43 #CIs>0=19 #CIs<0=24 |         |          |  |  |  |
|    |            |         |       | min(5)=                     | 5 -> 11 | -0.00020 |    |            |         |                             |         |          |  |  |  |
|    |            |         |       | #CIs=19 #CIs>0=13 #CIs<0=6  |         |          | 55 | Singlet-B2 | 47.0241 | 26.37                       | 0.3558  | 0.000    |  |  |  |
|    |            |         |       |                             |         |          |    |            |         | max(1)=                     | 3 -> 19 | 0.69344  |  |  |  |
| 52 | Singlet-A1 | 42.7663 | 28.99 | 0.3607                      | 0.000   |          |    |            |         | max(2)=                     | 3 -> 25 | 0.02654  |  |  |  |
|    |            |         |       | max(1)=                     | 4 -> 19 | 0.56600  |    |            |         | max(3)=                     | 2 -> 12 | 0.02362  |  |  |  |
|    |            |         |       | max(2)=                     | 4 -> 21 | 0.13569  |    |            |         | max(4)=                     | 5 -> 29 | 0.02103  |  |  |  |
|    |            |         |       | max(3)=                     | 5 -> 22 | 0.12699  |    |            |         | max(5)=                     | 4 -> 11 | 0.01362  |  |  |  |
|    |            |         |       | max(4)=                     | 3 -> 14 | 0.05355  |    |            |         | min(1)=                     | 5 -> 20 | -0.11068 |  |  |  |
|    |            |         |       | max(5)=                     | 4 -> 15 | 0.02704  |    |            |         | min(2)=                     | 4 -> 24 | -0.03698 |  |  |  |
|    |            |         |       | min(1)=                     | 2 -> 15 | -0.29279 |    |            |         | min(3)=                     | 2 -> 18 | -0.03028 |  |  |  |
|    |            |         |       | min(2)=                     | 3 -> 18 | -0.17426 |    |            |         | min(4)=                     | 4 -> 14 | -0.03028 |  |  |  |
|    |            |         |       | min(3)=                     | 5 -> 17 | -0.10626 |    |            |         | min(5)=                     | 3 -> 15 | -0.02499 |  |  |  |
|    |            |         |       | min(4)=                     | 4 -> 16 | -0.10144 |    |            |         | #CIs=35 #CIs>0=18 #CIs<0=17 |         |          |  |  |  |
|    |            |         |       | min(5)=                     | 2 -> 13 | -0.03243 |    |            |         |                             |         |          |  |  |  |
|    |            |         |       | #CIs=43 #CIs>0=22 #CIs<0=21 |         |          | 56 | Singlet-A1 | 47.2714 | 26.23                       | 0.2965  | 0.000    |  |  |  |
|    |            |         |       |                             |         |          |    |            |         | max(1)=                     | 5 -> 22 | 0.39363  |  |  |  |
| 53 | Singlet-B1 | 43.7573 | 28.33 | 0.1145                      | 0.000   |          |    |            |         | max(2)=                     | 2 -> 21 | 0.08596  |  |  |  |
|    |            |         |       | max(1)=                     | 5 -> 21 | 0.69212  |    |            |         | max(3)=                     | 2 -> 6  | 0.03560  |  |  |  |
|    |            |         |       | max(2)=                     | 4 -> 22 | 0.05676  |    |            |         | max(4)=                     | 4 -> 8  | 0.02839  |  |  |  |
|    |            |         |       | max(3)=                     | 5 -> 19 | 0.01071  |    |            |         | max(5)=                     | 2 -> 19 | 0.02639  |  |  |  |
|    |            |         |       | max(4)=                     | 2 -> 10 | 0.00865  |    |            |         | min(1)=                     | 4 -> 21 | -0.37873 |  |  |  |
|    |            |         |       | max(5)=                     | 5 -> 9  | 0.00562  |    |            |         | min(2)=                     | 3 -> 18 | -0.25834 |  |  |  |
|    |            |         |       | min(1)=                     | 3 -> 20 | -0.12990 |    |            |         | min(3)=                     | 4 -> 19 | -0.21687 |  |  |  |
|    |            |         |       | min(2)=                     | 5 -> 16 | -0.01665 |    |            |         | min(4)=                     | 5 -> 17 | -0.17170 |  |  |  |
|    |            |         |       | min(3)=                     | 2 -> 17 | -0.01244 |    |            |         | min(5)=                     | 4 -> 16 | -0.13721 |  |  |  |
|    |            |         |       | min(4)=                     | 2 -> 22 | -0.01132 |    |            |         | #CIs=43 #CIs>0=21 #CIs<0=22 |         |          |  |  |  |
|    |            |         |       | min(5)=                     | 5 -> 13 | -0.00623 |    |            |         |                             |         |          |  |  |  |
|    |            |         |       | #CIs=25 #CIs>0=11 #CIs<0=14 |         |          | 57 | Singlet-B1 | 47.3841 | 26.17                       | 0.1902  | 0.000    |  |  |  |
|    |            |         |       |                             |         |          |    |            |         | max(1)=                     | 3 -> 20 | 0.62026  |  |  |  |
| 54 | Singlet-A1 | 44.5993 | 27.80 | 0.1259                      | 0.000   |          |    |            |         | max(2)=                     | 4 -> 22 | 0.32582  |  |  |  |
|    |            |         |       | max(1)=                     | 4 -> 21 | 0.41260  |    |            |         | max(3)=                     | 5 -> 21 | 0.08981  |  |  |  |
|    |            |         |       | max(2)=                     | 2 -> 21 | 0.04761  |    |            |         | max(4)=                     | 5 -> 25 | 0.01873  |  |  |  |
|    |            |         |       | max(3)=                     | 2 -> 6  | 0.03356  |    |            |         | max(5)=                     | 2 -> 17 | 0.00921  |  |  |  |
|    |            |         |       | max(4)=                     | 5 -> 28 | 0.02047  |    |            |         | min(1)=                     | 5 -> 15 | -0.01313 |  |  |  |
|    |            |         |       | max(5)=                     | 4 -> 15 | 0.01940  |    |            |         | min(2)=                     | 5 -> 19 | -0.01227 |  |  |  |



|    |            |                             |         |          |       |            |                             |         |          |       |  |
|----|------------|-----------------------------|---------|----------|-------|------------|-----------------------------|---------|----------|-------|--|
|    |            | min(3)=                     | 5 -> 16 | -0.01145 |       |            | max(4)=                     | 2 -> 12 | 0.01002  |       |  |
|    |            | min(4)=                     | 4 -> 28 | -0.01091 |       |            | max(5)=                     | 4 -> 18 | 0.00934  |       |  |
|    |            | min(5)=                     | 2 -> 10 | -0.00900 |       |            | min(1)=                     | 2 -> 18 | -0.01892 |       |  |
|    |            | #CIs=26 #CIs>0=14 #CIs<0=12 |         |          |       |            | min(2)=                     | 2 -> 14 | -0.01674 |       |  |
| 58 | Singlet-A1 | 47.9076                     | 25.88   | 0.5313   | 0.000 |            | min(3)=                     | 3 -> 13 | -0.01336 |       |  |
|    |            | max(1)=                     | 5 -> 22 | 0.53441  |       |            | min(4)=                     | 4 -> 24 | -0.00861 |       |  |
|    |            | max(2)=                     | 4 -> 21 | 0.38508  |       |            | min(5)=                     | 4 -> 23 | -0.00630 |       |  |
|    |            | max(3)=                     | 4 -> 16 | 0.11178  |       |            | #CIs=36 #CIs>0=18 #CIs<0=18 |         |          |       |  |
|    |            | max(4)=                     | 3 -> 18 | 0.11138  | 60    | Singlet-B1 | 49.7636                     | 24.91   | 1.0406   | 0.000 |  |
|    |            | max(5)=                     | 5 -> 17 | 0.10545  |       |            | max(1)=                     | 4 -> 22 | 0.62129  |       |  |
|    |            | min(1)=                     | 4 -> 19 | -0.08636 |       |            | max(2)=                     | 5 -> 15 | 0.02381  |       |  |
|    |            | min(2)=                     | 3 -> 14 | -0.07030 |       |            | max(3)=                     | 5 -> 16 | 0.02359  |       |  |
|    |            | min(3)=                     | 3 -> 24 | -0.06036 |       |            | max(4)=                     | 5 -> 19 | 0.02200  |       |  |
|    |            | min(4)=                     | 2 -> 21 | -0.05737 |       |            | max(5)=                     | 2 -> 10 | 0.02083  |       |  |
|    |            | min(5)=                     | 2 -> 19 | -0.04030 |       |            | min(1)=                     | 3 -> 20 | -0.30623 |       |  |
|    |            | #CIs=43 #CIs>0=23 #CIs<0=20 |         |          |       |            | min(2)=                     | 5 -> 21 | -0.10925 |       |  |
| 59 | Singlet-B2 | 49.5809                     | 25.01   | 0.0571   | 0.000 |            | min(3)=                     | 5 -> 25 | -0.05403 |       |  |
|    |            | max(1)=                     | 3 -> 21 | 0.70602  |       |            | min(4)=                     | 2 -> 17 | -0.05347 |       |  |
|    |            | max(2)=                     | 3 -> 15 | 0.01107  |       |            | min(5)=                     | 5 -> 31 | -0.01513 |       |  |
|    |            | max(3)=                     | 5 -> 20 | 0.01099  |       |            | #CIs=26 #CIs>0=14 #CIs<0=12 |         |          |       |  |

### 7.2.3 Main contributions from different excited states at CIS approach

|          |            |                            |               |          |                     |            |                           |         |          |        |       |
|----------|------------|----------------------------|---------------|----------|---------------------|------------|---------------------------|---------|----------|--------|-------|
| #_exc.st | ___symm___ | Exc.E                      | Osc._Strength | ___f___  | _ <del>S</del> *2>_ | Singlet-A2 | 10.4507                   | 118.64  | 0.0000   | 0.000  |       |
| 1        | Singlet-B1 | 8.7596                     | 141.54        | 0.0459   | 0.000               |            | max(1)=                   | 5 -> 7  | 0.60811  |        |       |
|          |            | max(1)=                    | 5 -> 6        | 0.62825  |                     |            | max(2)=                   | 5 -> 11 | 0.20221  |        |       |
|          |            | max(2)=                    | 5 -> 10       | 0.28394  |                     |            | max(3)=                   | 5 -> 17 | 0.04983  |        |       |
|          |            | max(3)=                    | 5 -> 16       | 0.03734  |                     |            | max(4)=                   | 5 -> 24 | 0.01332  |        |       |
|          |            | max(4)=                    | 5 -> 31       | 0.00598  |                     |            | max(5)=                   | 5 -> 35 | 0.00357  |        |       |
|          |            | max(5)=                    | 5 -> 30       | 0.00246  |                     |            | min(1)=                   | 5 -> 12 | -0.27743 |        |       |
|          |            | min(1)=                    | 5 -> 13       | -0.11236 |                     |            | min(2)=                   | 5 -> 14 | -0.09814 |        |       |
|          |            | min(2)=                    | 5 -> 8        | -0.07639 |                     |            | min(3)=                   | 5 -> 32 | -0.00334 |        |       |
|          |            | min(3)=                    | 5 -> 15       | -0.06447 |                     |            | min(4)=                   | 3 -> 18 | -0.00240 |        |       |
|          |            | min(4)=                    | 5 -> 21       | -0.01729 |                     |            | min(5)=                   | 2 -> 29 | -0.00173 |        |       |
|          |            | min(5)=                    | 4 -> 9        | -0.01212 |                     |            | #CIs=18 #CIs>0=9 #CIs<0=9 |         |          |        |       |
|          |            | #CIs=23 #CIs>0=8 #CIs<0=15 |               |          |                     | 3          | Singlet-A1                | 11.0021 | 112.69   | 0.1071 | 0.000 |
|          |            |                            |               |          |                     |            | max(1)=                   | 4 -> 6  | 0.63565  |        |       |

|   |                             |         |          |        |       |                             |         |          |        |       |
|---|-----------------------------|---------|----------|--------|-------|-----------------------------|---------|----------|--------|-------|
|   | max(2)=                     | 4 -> 10 | 0.25113  |        |       | max(4)=                     | 5 -> 23 | 0.00384  |        |       |
|   | max(3)=                     | 4 -> 16 | 0.01739  |        |       | max(5)=                     | 2 -> 20 | 0.00373  |        |       |
|   | max(4)=                     | 3 -> 14 | 0.01514  |        |       | min(1)=                     | 5 -> 7  | -0.30191 |        |       |
|   | max(5)=                     | 3 -> 12 | 0.01127  |        |       | min(2)=                     | 5 -> 14 | -0.18242 |        |       |
|   | min(1)=                     | 4 -> 13 | -0.12227 |        |       | min(3)=                     | 5 -> 12 | -0.16008 |        |       |
|   | min(2)=                     | 5 -> 9  | -0.11528 |        |       | min(4)=                     | 3 -> 9  | -0.00832 |        |       |
|   | min(3)=                     | 4 -> 15 | -0.04943 |        |       | min(5)=                     | 3 -> 18 | -0.00221 |        |       |
|   | min(4)=                     | 5 -> 18 | -0.02191 |        |       | #CIs=17 #CIs>0=9 #CIs<0=8   |         |          |        |       |
|   | min(5)=                     | 4 -> 21 | -0.01857 |        |       |                             |         |          |        |       |
|   | #CIs=40 #CIs>0=15 #CIs<0=25 |         |          |        | 7     | Singlet-A1                  | 13.5680 | 91.38    | 0.0000 | 0.000 |
|   |                             |         |          |        |       | max(1)=                     | 5 -> 9  | 0.64194  |        |       |
| 4 | Singlet-B2                  | 12.6684 | 97.87    | 0.0363 | 0.000 | max(2)=                     | 4 -> 8  | 0.21415  |        |       |
|   | max(1)=                     | 4 -> 7  | 0.63875  |        |       | max(3)=                     | 4 -> 6  | 0.13264  |        |       |
|   | max(2)=                     | 4 -> 11 | 0.13686  |        |       | max(4)=                     | 3 -> 12 | 0.07246  |        |       |
|   | max(3)=                     | 4 -> 17 | 0.04438  |        |       | max(5)=                     | 5 -> 18 | 0.04609  |        |       |
|   | max(4)=                     | 3 -> 6  | 0.01718  |        |       | min(1)=                     | 3 -> 7  | -0.06950 |        |       |
|   | max(5)=                     | 3 -> 15 | 0.01369  |        |       | min(2)=                     | 4 -> 13 | -0.05154 |        |       |
|   | min(1)=                     | 4 -> 12 | -0.25881 |        |       | min(3)=                     | 4 -> 10 | -0.05098 |        |       |
|   | min(2)=                     | 4 -> 14 | -0.05847 |        |       | min(4)=                     | 3 -> 11 | -0.04809 |        |       |
|   | min(3)=                     | 2 -> 11 | -0.01115 |        |       | min(5)=                     | 4 -> 16 | -0.04084 |        |       |
|   | min(4)=                     | 2 -> 7  | -0.00633 |        |       | #CIs=40 #CIs>0=19 #CIs<0=21 |         |          |        |       |
|   | min(5)=                     | 3 -> 19 | -0.00587 |        |       |                             |         |          |        |       |
|   | #CIs=34 #CIs>0=22 #CIs<0=12 |         |          |        | 8     | Singlet-B1                  | 13.7253 | 90.33    | 0.0028 | 0.000 |
|   |                             |         |          |        |       | max(1)=                     | 5 -> 10 | 0.54474  |        |       |
| 5 | Singlet-B1                  | 12.8836 | 96.23    | 0.0149 | 0.000 | max(2)=                     | 5 -> 8  | 0.36545  |        |       |
|   | max(1)=                     | 5 -> 8  | 0.58332  |        |       | max(3)=                     | 4 -> 9  | 0.01396  |        |       |
|   | max(2)=                     | 5 -> 6  | 0.20488  |        |       | max(4)=                     | 2 -> 9  | 0.00619  |        |       |
|   | max(3)=                     | 5 -> 15 | 0.07595  |        |       | max(5)=                     | 4 -> 22 | 0.00579  |        |       |
|   | max(4)=                     | 5 -> 25 | 0.00777  |        |       | min(1)=                     | 5 -> 6  | -0.22749 |        |       |
|   | max(5)=                     | 3 -> 20 | 0.00309  |        |       | min(2)=                     | 5 -> 15 | -0.09445 |        |       |
|   | min(1)=                     | 5 -> 10 | -0.30898 |        |       | min(3)=                     | 5 -> 13 | -0.08680 |        |       |
|   | min(2)=                     | 5 -> 13 | -0.09950 |        |       | min(4)=                     | 5 -> 21 | -0.03115 |        |       |
|   | min(3)=                     | 5 -> 16 | -0.07870 |        |       | min(5)=                     | 3 -> 20 | -0.00753 |        |       |
|   | min(4)=                     | 4 -> 9  | -0.01301 |        |       | #CIs=23 #CIs>0=10 #CIs<0=13 |         |          |        |       |
|   | min(5)=                     | 5 -> 19 | -0.00819 |        |       |                             |         |          |        |       |
|   | #CIs=23 #CIs>0=12 #CIs<0=11 |         |          |        | 9     | Singlet-B2                  | 14.7596 | 84.00    | 0.1622 | 0.000 |
|   |                             |         |          |        |       | max(1)=                     | 3 -> 6  | 0.63000  |        |       |
| 6 | Singlet-A2                  | 13.4466 | 92.20    | 0.0000 | 0.000 | max(2)=                     | 3 -> 10 | 0.27294  |        |       |
|   | max(1)=                     | 5 -> 11 | 0.59031  |        |       | max(3)=                     | 3 -> 16 | 0.03319  |        |       |
|   | max(2)=                     | 5 -> 17 | 0.03236  |        |       | max(4)=                     | 4 -> 14 | 0.03221  |        |       |
|   | max(3)=                     | 5 -> 24 | 0.01770  |        |       | max(5)=                     | 2 -> 12 | 0.01593  |        |       |

|    |            |                             |         |          |       |    |            |                             |         |          |       |  |
|----|------------|-----------------------------|---------|----------|-------|----|------------|-----------------------------|---------|----------|-------|--|
|    |            | min(1)=                     | 3 -> 13 | -0.10156 |       |    |            | min(3)=                     | 4 -> 10 | -0.10060 |       |  |
|    |            | min(2)=                     | 3 -> 8  | -0.09205 |       |    |            | min(4)=                     | 3 -> 14 | -0.06389 |       |  |
|    |            | min(3)=                     | 4 -> 11 | -0.06495 |       |    |            | min(5)=                     | 4 -> 13 | -0.06292 |       |  |
|    |            | min(4)=                     | 3 -> 15 | -0.04971 |       |    |            | #CIs=41 #CIs>0=21 #CIs<0=20 |         |          |       |  |
|    |            | min(5)=                     | 2 -> 7  | -0.01485 |       |    |            |                             |         |          |       |  |
|    |            | #CIs=32 #CIs>0=16 #CIs<0=16 |         |          |       | 13 | Singlet-B1 | 15.7335                     | 78.80   | 0.2358   | 0.000 |  |
| 10 | Singlet-B1 | 14.9661                     | 82.84   | 0.0090   | 0.000 |    |            | max(1)=                     | 5 -> 13 | 0.66537  |       |  |
|    |            | max(1)=                     | 4 -> 9  | 0.68307  |       |    |            | max(2)=                     | 5 -> 8  | 0.11575  |       |  |
|    |            | max(2)=                     | 5 -> 13 | 0.15723  |       |    |            | max(3)=                     | 5 -> 6  | 0.09714  |       |  |
|    |            | max(3)=                     | 4 -> 18 | 0.07561  |       |    |            | max(4)=                     | 5 -> 10 | 0.06988  |       |  |
|    |            | max(4)=                     | 5 -> 6  | 0.04301  |       |    |            | max(5)=                     | 5 -> 21 | 0.02661  |       |  |
|    |            | max(5)=                     | 5 -> 8  | 0.02926  |       |    |            | min(1)=                     | 4 -> 9  | -0.16392 |       |  |
|    |            | min(1)=                     | 5 -> 15 | -0.00824 |       |    |            | min(2)=                     | 5 -> 15 | -0.02624 |       |  |
|    |            | min(2)=                     | 5 -> 16 | -0.00811 |       |    |            | min(3)=                     | 4 -> 18 | -0.01546 |       |  |
|    |            | min(3)=                     | 2 -> 28 | -0.00230 |       |    |            | min(4)=                     | 3 -> 20 | -0.00964 |       |  |
|    |            | min(4)=                     | 2 -> 22 | -0.00155 |       |    |            | min(5)=                     | 5 -> 16 | -0.00954 |       |  |
|    |            | min(5)=                     | 5 -> 31 | -0.00138 |       |    |            | #CIs=25 #CIs>0=14 #CIs<0=11 |         |          |       |  |
|    |            | #CIs=23 #CIs>0=15 #CIs<0=8  |         |          |       | 14 | Singlet-A1 | 15.7372                     | 78.78   | 0.0256   | 0.000 |  |
| 11 | Singlet-A2 | 15.4066                     | 80.47   | 0.0000   | 0.000 |    |            | max(1)=                     | 4 -> 10 | 0.61650  |       |  |
|    |            | max(1)=                     | 5 -> 12 | 0.61191  |       |    |            | max(2)=                     | 4 -> 8  | 0.17460  |       |  |
|    |            | max(2)=                     | 5 -> 11 | 0.28172  |       |    |            | max(3)=                     | 3 -> 12 | 0.03133  |       |  |
|    |            | max(3)=                     | 5 -> 7  | 0.19743  |       |    |            | max(4)=                     | 5 -> 9  | 0.02985  |       |  |
|    |            | max(4)=                     | 5 -> 14 | 0.03333  |       |    |            | max(5)=                     | 3 -> 14 | 0.01904  |       |  |
|    |            | max(5)=                     | 5 -> 32 | 0.00278  |       |    |            | min(1)=                     | 4 -> 6  | -0.25581 |       |  |
|    |            | min(1)=                     | 5 -> 17 | -0.07776 |       |    |            | min(2)=                     | 4 -> 15 | -0.11425 |       |  |
|    |            | min(2)=                     | 5 -> 24 | -0.00666 |       |    |            | min(3)=                     | 3 -> 7  | -0.06418 |       |  |
|    |            | min(3)=                     | 5 -> 35 | -0.00234 |       |    |            | min(4)=                     | 4 -> 13 | -0.05068 |       |  |
|    |            | min(4)=                     | 5 -> 27 | -0.00122 |       |    |            | min(5)=                     | 3 -> 11 | -0.03187 |       |  |
|    |            | min(5)=                     | 5 -> 23 | -0.00080 |       |    |            | #CIs=40 #CIs>0=15 #CIs<0=25 |         |          |       |  |
|    |            | #CIs=19 #CIs>0=11 #CIs<0=8  |         |          |       | 15 | Singlet-B2 | 15.9655                     | 77.66   | 0.1960   | 0.000 |  |
| 12 | Singlet-A1 | 15.5618                     | 79.67   | 0.0269   | 0.000 |    |            | max(1)=                     | 4 -> 11 | 0.63282  |       |  |
|    |            | max(1)=                     | 4 -> 8  | 0.57809  |       |    |            | max(2)=                     | 3 -> 6  | 0.07824  |       |  |
|    |            | max(2)=                     | 3 -> 7  | 0.27203  |       |    |            | max(3)=                     | 3 -> 15 | 0.03434  |       |  |
|    |            | max(3)=                     | 3 -> 11 | 0.12373  |       |    |            | max(4)=                     | 4 -> 17 | 0.03209  |       |  |
|    |            | max(4)=                     | 3 -> 17 | 0.04115  |       |    |            | max(5)=                     | 5 -> 20 | 0.01834  |       |  |
|    |            | max(5)=                     | 4 -> 6  | 0.02522  |       |    |            | min(1)=                     | 4 -> 7  | -0.21697 |       |  |
|    |            | min(1)=                     | 3 -> 12 | -0.17389 |       |    |            | min(2)=                     | 4 -> 12 | -0.15568 |       |  |
|    |            | min(2)=                     | 5 -> 9  | -0.15136 |       |    |            | min(3)=                     | 4 -> 14 | -0.13131 |       |  |
|    |            |                             |         |          |       |    |            | min(4)=                     | 3 -> 13 | -0.02863 |       |  |

|    |            |         |       |        |       |         |           |           |  |    |            |         |       |              |
|----|------------|---------|-------|--------|-------|---------|-----------|-----------|--|----|------------|---------|-------|--------------|
|    |            |         |       |        |       | min(5)= | 3 -> 8    | -0.01830  |  |    |            |         |       |              |
|    |            |         |       |        |       | #CIs=34 | #CIs>0=20 | #CIs<0=14 |  | 19 | Singlet-A2 | 19.1457 | 64.76 | 0.0000 0.000 |
|    |            |         |       |        |       |         |           |           |  |    |            |         |       |              |
|    |            |         |       |        |       |         |           |           |  |    |            |         |       |              |
| 16 | Singlet-B2 | 17.3383 | 71.51 | 0.0078 | 0.000 |         |           |           |  |    |            |         |       |              |
|    |            |         |       |        |       | max(1)= | 4 -> 12   | 0.62464   |  |    |            |         |       |              |
|    |            |         |       |        |       | max(2)= | 4 -> 11   | 0.23694   |  |    |            |         |       |              |
|    |            |         |       |        |       | max(3)= | 4 -> 7    | 0.21147   |  |    |            |         |       |              |
|    |            |         |       |        |       | max(4)= | 4 -> 14   | 0.04462   |  |    |            |         |       |              |
|    |            |         |       |        |       | max(5)= | 3 -> 6    | 0.01592   |  |    |            |         |       |              |
|    |            |         |       |        |       | min(1)= | 4 -> 17   | -0.07803  |  |    |            |         |       |              |
|    |            |         |       |        |       | min(2)= | 3 -> 10   | -0.01703  |  |    |            |         |       |              |
|    |            |         |       |        |       | min(3)= | 4 -> 24   | -0.00764  |  |    |            |         |       |              |
|    |            |         |       |        |       | min(4)= | 3 -> 8    | -0.00527  |  |    |            |         |       |              |
|    |            |         |       |        |       | min(5)= | 2 -> 7    | -0.00513  |  |    |            |         |       |              |
|    |            |         |       |        |       | #CIs=34 | #CIs>0=17 | #CIs<0=17 |  | 20 | Singlet-B2 | 19.1730 | 64.67 | 0.0189 0.000 |
|    |            |         |       |        |       |         |           |           |  |    |            |         |       |              |
|    |            |         |       |        |       |         |           |           |  |    |            |         |       |              |
|    |            |         |       |        |       |         |           |           |  |    |            |         |       |              |
|    |            |         |       |        |       |         |           |           |  |    |            |         |       |              |
|    |            |         |       |        |       |         |           |           |  |    |            |         |       |              |
|    |            |         |       |        |       |         |           |           |  |    |            |         |       |              |
|    |            |         |       |        |       |         |           |           |  |    |            |         |       |              |
|    |            |         |       |        |       |         |           |           |  |    |            |         |       |              |
|    |            |         |       |        |       |         |           |           |  |    |            |         |       |              |
|    |            |         |       |        |       |         |           |           |  |    |            |         |       |              |
|    |            |         |       |        |       |         |           |           |  |    |            |         |       |              |
| 17 | Singlet-A1 | 17.5348 | 70.71 | 0.0339 | 0.000 |         |           |           |  |    |            |         |       |              |
|    |            |         |       |        |       | max(1)= | 4 -> 13   | 0.40651   |  |    |            |         |       |              |
|    |            |         |       |        |       | max(2)= | 4 -> 8    | 0.24658   |  |    |            |         |       |              |
|    |            |         |       |        |       | max(3)= | 4 -> 6    | 0.07958   |  |    |            |         |       |              |
|    |            |         |       |        |       | max(4)= | 3 -> 12   | 0.06108   |  |    |            |         |       |              |
|    |            |         |       |        |       | max(5)= | 4 -> 21   | 0.03034   |  |    |            |         |       |              |
|    |            |         |       |        |       | min(1)= | 3 -> 7    | -0.49006  |  |    |            |         |       |              |
|    |            |         |       |        |       | min(2)= | 5 -> 9    | -0.12969  |  |    |            |         |       |              |
|    |            |         |       |        |       | min(3)= | 4 -> 10   | -0.05437  |  |    |            |         |       |              |
|    |            |         |       |        |       | min(4)= | 4 -> 15   | -0.02547  |  |    |            |         |       |              |
|    |            |         |       |        |       | min(5)= | 3 -> 14   | -0.01832  |  |    |            |         |       |              |
|    |            |         |       |        |       | #CIs=41 | #CIs>0=26 | #CIs<0=15 |  | 21 | Singlet-B2 | 19.9832 | 62.04 | 0.2440 0.000 |
|    |            |         |       |        |       |         |           |           |  |    |            |         |       |              |
|    |            |         |       |        |       |         |           |           |  |    |            |         |       |              |
|    |            |         |       |        |       |         |           |           |  |    |            |         |       |              |
|    |            |         |       |        |       |         |           |           |  |    |            |         |       |              |
|    |            |         |       |        |       |         |           |           |  |    |            |         |       |              |
|    |            |         |       |        |       |         |           |           |  |    |            |         |       |              |
|    |            |         |       |        |       |         |           |           |  |    |            |         |       |              |
|    |            |         |       |        |       |         |           |           |  |    |            |         |       |              |
|    |            |         |       |        |       |         |           |           |  |    |            |         |       |              |
|    |            |         |       |        |       |         |           |           |  |    |            |         |       |              |
|    |            |         |       |        |       |         |           |           |  |    |            |         |       |              |
|    |            |         |       |        |       |         |           |           |  |    |            |         |       |              |
| 18 | Singlet-A1 | 17.6965 | 70.06 | 0.0067 | 0.000 |         |           |           |  |    |            |         |       |              |
|    |            |         |       |        |       | max(1)= | 4 -> 13   | 0.55292   |  |    |            |         |       |              |
|    |            |         |       |        |       | max(2)= | 3 -> 7    | 0.38995   |  |    |            |         |       |              |
|    |            |         |       |        |       | max(3)= | 4 -> 10   | 0.12599   |  |    |            |         |       |              |
|    |            |         |       |        |       | max(4)= | 5 -> 9    | 0.10510   |  |    |            |         |       |              |
|    |            |         |       |        |       | max(5)= | 4 -> 6    | 0.07262   |  |    |            |         |       |              |
|    |            |         |       |        |       | min(1)= | 4 -> 8    | -0.07216  |  |    |            |         |       |              |
|    |            |         |       |        |       | min(2)= | 5 -> 18   | -0.02929  |  |    |            |         |       |              |
|    |            |         |       |        |       | min(3)= | 4 -> 15   | -0.02700  |  |    |            |         |       |              |
|    |            |         |       |        |       | min(4)= | 4 -> 16   | -0.02532  |  |    |            |         |       |              |
|    |            |         |       |        |       | min(5)= | 3 -> 17   | -0.02259  |  |    |            |         |       |              |
|    |            |         |       |        |       | #CIs=41 | #CIs>0=14 | #CIs<0=27 |  | 22 | Singlet-A1 | 20.4429 | 60.65 | 0.2268 0.000 |

|    |            |                             |         |          |       |            |         |                             |         |          |  |  |
|----|------------|-----------------------------|---------|----------|-------|------------|---------|-----------------------------|---------|----------|--|--|
|    |            | max(1)=                     | 3 -> 11 | 0.68186  |       |            |         | max(3)=                     | 5 -> 27 | 0.00309  |  |  |
|    |            | max(2)=                     | 5 -> 9  | 0.07609  |       |            |         | max(4)=                     | 2 -> 29 | 0.00193  |  |  |
|    |            | max(3)=                     | 4 -> 10 | 0.05693  |       |            |         | max(5)=                     | 3 -> 18 | 0.00032  |  |  |
|    |            | max(4)=                     | 4 -> 15 | 0.02959  |       |            |         | min(1)=                     | 5 -> 12 | -0.12071 |  |  |
|    |            | max(5)=                     | 2 -> 8  | 0.02204  |       |            |         | min(2)=                     | 5 -> 24 | -0.04651 |  |  |
|    |            | min(1)=                     | 4 -> 8  | -0.08372 |       |            |         | min(3)=                     | 5 -> 17 | -0.02464 |  |  |
|    |            | min(2)=                     | 3 -> 14 | -0.08321 |       |            |         | min(4)=                     | 3 -> 9  | -0.01695 |  |  |
|    |            | min(3)=                     | 3 -> 7  | -0.07509 |       |            |         | min(5)=                     | 5 -> 23 | -0.01273 |  |  |
|    |            | min(4)=                     | 5 -> 18 | -0.04105 |       |            |         | #CIs=17 #CIs>0=5 #CIs<0=12  |         |          |  |  |
|    |            | min(5)=                     | 4 -> 16 | -0.03452 |       |            |         |                             |         |          |  |  |
|    |            | #CIs=38 #CIs>0=19 #CIs<0=19 |         |          | 26    | Singlet-B1 | 24.5042 | 50.60                       | 0.0603  | 0.000    |  |  |
|    |            |                             |         |          |       |            |         | max(1)=                     | 5 -> 15 | 0.68640  |  |  |
| 23 | Singlet-B2 | 21.5936                     | 57.42   | 0.0146   | 0.000 |            |         | max(2)=                     | 5 -> 10 | 0.14307  |  |  |
|    |            | max(1)=                     | 3 -> 13 | 0.68816  |       |            |         | max(3)=                     | 5 -> 25 | 0.03245  |  |  |
|    |            | max(2)=                     | 3 -> 6  | 0.09417  |       |            |         | max(4)=                     | 3 -> 20 | 0.02433  |  |  |
|    |            | max(3)=                     | 3 -> 8  | 0.08007  |       |            |         | max(5)=                     | 5 -> 21 | 0.01642  |  |  |
|    |            | max(4)=                     | 3 -> 10 | 0.06493  |       |            |         | min(1)=                     | 5 -> 16 | -0.06138 |  |  |
|    |            | max(5)=                     | 4 -> 14 | 0.05304  |       |            |         | min(2)=                     | 5 -> 19 | -0.02465 |  |  |
|    |            | min(1)=                     | 3 -> 15 | -0.02446 |       |            |         | min(3)=                     | 5 -> 8  | -0.02375 |  |  |
|    |            | min(2)=                     | 4 -> 12 | -0.01946 |       |            |         | min(4)=                     | 2 -> 9  | -0.01869 |  |  |
|    |            | min(3)=                     | 3 -> 16 | -0.01646 |       |            |         | min(5)=                     | 4 -> 22 | -0.01563 |  |  |
|    |            | min(4)=                     | 2 -> 7  | -0.01594 |       |            |         | #CIs=26 #CIs>0=14 #CIs<0=12 |         |          |  |  |
|    |            | min(5)=                     | 2 -> 11 | -0.01132 |       |            |         |                             |         |          |  |  |
|    |            | #CIs=34 #CIs>0=21 #CIs<0=13 |         |          | 27    | Singlet-B2 | 25.6603 | 48.32                       | 0.1368  | 0.000    |  |  |
|    |            |                             |         |          |       |            |         | max(1)=                     | 4 -> 14 | 0.67300  |  |  |
| 24 | Singlet-A1 | 22.3774                     | 55.41   | 0.0038   | 0.000 |            |         | max(2)=                     | 4 -> 11 | 0.12166  |  |  |
|    |            | max(1)=                     | 3 -> 12 | 0.66336  |       |            |         | max(3)=                     | 3 -> 19 | 0.02661  |  |  |
|    |            | max(2)=                     | 3 -> 7  | 0.13470  |       |            |         | max(4)=                     | 2 -> 17 | 0.01065  |  |  |
|    |            | max(3)=                     | 4 -> 8  | 0.09661  |       |            |         | max(5)=                     | 2 -> 23 | 0.00927  |  |  |
|    |            | max(4)=                     | 5 -> 18 | 0.07963  |       |            |         | min(1)=                     | 4 -> 12 | -0.09940 |  |  |
|    |            | max(5)=                     | 4 -> 16 | 0.05954  |       |            |         | min(2)=                     | 3 -> 15 | -0.09057 |  |  |
|    |            | min(1)=                     | 5 -> 9  | -0.09606 |       |            |         | min(3)=                     | 3 -> 10 | -0.07164 |  |  |
|    |            | min(2)=                     | 4 -> 10 | -0.05992 |       |            |         | min(4)=                     | 3 -> 13 | -0.05417 |  |  |
|    |            | min(3)=                     | 4 -> 15 | -0.05554 |       |            |         | min(5)=                     | 5 -> 20 | -0.04144 |  |  |
|    |            | min(4)=                     | 4 -> 13 | -0.04185 |       |            |         | #CIs=35 #CIs>0=13 #CIs<0=22 |         |          |  |  |
|    |            | min(5)=                     | 3 -> 17 | -0.03172 |       |            |         |                             |         |          |  |  |
|    |            | #CIs=38 #CIs>0=24 #CIs<0=14 |         |          | 28    | Singlet-A1 | 26.6329 | 46.55                       | 0.0014  | 0.000    |  |  |
|    |            |                             |         |          |       |            |         | max(1)=                     | 4 -> 15 | 0.68371  |  |  |
| 25 | Singlet-A2 | 22.6302                     | 54.79   | 0.0000   | 0.000 |            |         | max(2)=                     | 4 -> 10 | 0.12677  |  |  |
|    |            | max(1)=                     | 5 -> 14 | 0.67160  |       |            |         | max(3)=                     | 3 -> 12 | 0.06187  |  |  |
|    |            | max(2)=                     | 5 -> 11 | 0.17631  |       |            |         | max(4)=                     | 5 -> 18 | 0.05178  |  |  |

|    |            |                             |         |          |       |            |         |       |                             |         |          |  |
|----|------------|-----------------------------|---------|----------|-------|------------|---------|-------|-----------------------------|---------|----------|--|
|    |            | max(5)=                     | 4 -> 25 | 0.03802  |       |            |         |       | min(2)=                     | 2 -> 8  | -0.07473 |  |
|    |            | min(1)=                     | 3 -> 14 | -0.05265 |       |            |         |       | min(3)=                     | 2 -> 15 | -0.05155 |  |
|    |            | min(2)=                     | 3 -> 11 | -0.04027 |       |            |         |       | min(4)=                     | 5 -> 9  | -0.01481 |  |
|    |            | min(3)=                     | 5 -> 9  | -0.02890 |       |            |         |       | min(5)=                     | 3 -> 12 | -0.00787 |  |
|    |            | min(4)=                     | 2 -> 6  | -0.02531 |       |            |         |       | #CIs=40 #CIs>0=25 #CIs<0=15 |         |          |  |
|    |            | min(5)=                     | 2 -> 10 | -0.02402 |       |            |         |       |                             |         |          |  |
|    |            | #CIs=41 #CIs>0=25 #CIs<0=16 |         |          | 32    | Singlet-B1 | 33.7190 | 36.77 | 0.0231                      | 0.000   |          |  |
|    |            |                             |         |          |       |            |         |       | max(1)=                     | 5 -> 16 | 0.69503  |  |
| 29 | Singlet-A1 | 29.8738                     | 41.50   | 0.1879   | 0.000 |            |         |       | max(2)=                     | 5 -> 8  | 0.07297  |  |
|    |            | max(1)=                     | 3 -> 14 | 0.67362  |       |            |         |       | max(3)=                     | 5 -> 15 | 0.06835  |  |
|    |            | max(2)=                     | 5 -> 18 | 0.10998  |       |            |         |       | max(4)=                     | 5 -> 21 | 0.04478  |  |
|    |            | max(3)=                     | 3 -> 11 | 0.10357  |       |            |         |       | max(5)=                     | 3 -> 20 | 0.01845  |  |
|    |            | max(4)=                     | 4 -> 16 | 0.08018  |       |            |         |       | min(1)=                     | 4 -> 18 | -0.03435 |  |
|    |            | max(5)=                     | 4 -> 15 | 0.05176  |       |            |         |       | min(2)=                     | 5 -> 10 | -0.03166 |  |
|    |            | min(1)=                     | 3 -> 12 | -0.05647 |       |            |         |       | min(3)=                     | 5 -> 19 | -0.02252 |  |
|    |            | min(2)=                     | 4 -> 19 | -0.04197 |       |            |         |       | min(4)=                     | 2 -> 9  | -0.02200 |  |
|    |            | min(3)=                     | 2 -> 6  | -0.03766 |       |            |         |       | min(5)=                     | 5 -> 25 | -0.01923 |  |
|    |            | min(4)=                     | 5 -> 9  | -0.03354 |       |            |         |       | #CIs=25 #CIs>0=13 #CIs<0=12 |         |          |  |
|    |            | min(5)=                     | 3 -> 24 | -0.02298 |       |            |         |       |                             |         |          |  |
|    |            | #CIs=41 #CIs>0=20 #CIs<0=21 |         |          | 33    | Singlet-B2 | 33.7757 | 36.71 | 0.0051                      | 0.000   |          |  |
|    |            |                             |         |          |       |            |         |       | max(1)=                     | 2 -> 7  | 0.62408  |  |
| 30 | Singlet-B2 | 31.0714                     | 39.90   | 0.3134   | 0.000 |            |         |       | max(2)=                     | 2 -> 11 | 0.19587  |  |
|    |            | max(1)=                     | 3 -> 15 | 0.67968  |       |            |         |       | max(3)=                     | 5 -> 20 | 0.03739  |  |
|    |            | max(2)=                     | 3 -> 10 | 0.11095  |       |            |         |       | max(4)=                     | 2 -> 17 | 0.03603  |  |
|    |            | max(3)=                     | 4 -> 14 | 0.09533  |       |            |         |       | max(5)=                     | 4 -> 17 | 0.02389  |  |
|    |            | max(4)=                     | 2 -> 11 | 0.03544  |       |            |         |       | min(1)=                     | 2 -> 12 | -0.24456 |  |
|    |            | max(5)=                     | 3 -> 25 | 0.02414  |       |            |         |       | min(2)=                     | 2 -> 14 | -0.07528 |  |
|    |            | min(1)=                     | 5 -> 20 | -0.06814 |       |            |         |       | min(3)=                     | 3 -> 15 | -0.03298 |  |
|    |            | min(2)=                     | 3 -> 16 | -0.06393 |       |            |         |       | min(4)=                     | 4 -> 14 | -0.01900 |  |
|    |            | min(3)=                     | 4 -> 17 | -0.04064 |       |            |         |       | min(5)=                     | 3 -> 19 | -0.01492 |  |
|    |            | min(4)=                     | 2 -> 14 | -0.03912 |       |            |         |       | #CIs=33 #CIs>0=20 #CIs<0=13 |         |          |  |
|    |            | min(5)=                     | 2 -> 12 | -0.02993 |       |            |         |       |                             |         |          |  |
|    |            | #CIs=35 #CIs>0=14 #CIs<0=21 |         |          | 34    | Singlet-A1 | 35.2181 | 35.20 | 0.0045                      | 0.000   |          |  |
|    |            |                             |         |          |       |            |         |       | max(1)=                     | 5 -> 18 | 0.50657  |  |
| 31 | Singlet-A1 | 32.0963                     | 38.63   | 0.0133   | 0.000 |            |         |       | max(2)=                     | 2 -> 10 | 0.06044  |  |
|    |            | max(1)=                     | 2 -> 6  | 0.63250  |       |            |         |       | max(3)=                     | 2 -> 8  | 0.02961  |  |
|    |            | max(2)=                     | 2 -> 10 | 0.25262  |       |            |         |       | max(4)=                     | 4 -> 10 | 0.02261  |  |
|    |            | max(3)=                     | 5 -> 18 | 0.11731  |       |            |         |       | max(5)=                     | 5 -> 22 | 0.01503  |  |
|    |            | max(4)=                     | 4 -> 16 | 0.05076  |       |            |         |       | min(1)=                     | 4 -> 16 | -0.46822 |  |
|    |            | max(5)=                     | 4 -> 15 | 0.02899  |       |            |         |       | min(2)=                     | 2 -> 6  | -0.07725 |  |
|    |            | min(1)=                     | 2 -> 13 | -0.09101 |       |            |         |       | min(3)=                     | 4 -> 8  | -0.05520 |  |

|    |            |                             |         |          |       |            |                             |       |          |       |
|----|------------|-----------------------------|---------|----------|-------|------------|-----------------------------|-------|----------|-------|
|    |            | min(4)=                     | 5 -> 9  | -0.04700 |       |            | #CIs=41 #CIs>0=17 #CIs<0=24 |       |          |       |
|    |            | min(5)=                     | 4 -> 15 | -0.04417 |       |            |                             |       |          |       |
|    |            | #CIs=41 #CIs>0=15 #CIs<0=26 |         |          | 38    | Singlet-B2 | 36.7336                     | 33.75 | 0.0025   | 0.000 |
|    |            |                             |         |          |       | max(1)=    | 2 -> 11                     |       | 0.60576  |       |
| 35 | Singlet-A2 | 35.2394                     | 35.18   | 0.0000   | 0.000 | max(2)=    | 5 -> 20                     |       | 0.03480  |       |
|    |            | max(1)=                     | 5 -> 17 | 0.69875  |       | max(3)=    | 2 -> 17                     |       | 0.02424  |       |
|    |            | max(2)=                     | 5 -> 12 | 0.09127  |       | max(4)=    | 4 -> 17                     |       | 0.01709  |       |
|    |            | max(3)=                     | 5 -> 14 | 0.04491  |       | max(5)=    | 2 -> 24                     |       | 0.01095  |       |
|    |            | max(4)=                     | 5 -> 24 | 0.02428  |       | min(1)=    | 2 -> 7                      |       | -0.27770 |       |
|    |            | max(5)=                     | 5 -> 35 | 0.01103  |       | min(2)=    | 2 -> 14                     |       | -0.16780 |       |
|    |            | min(1)=                     | 5 -> 32 | -0.02214 |       | min(3)=    | 2 -> 12                     |       | -0.15289 |       |
|    |            | min(2)=                     | 5 -> 7  | -0.00764 |       | min(4)=    | 3 -> 15                     |       | -0.03692 |       |
|    |            | min(3)=                     | 5 -> 23 | -0.00494 |       | min(5)=    | 4 -> 14                     |       | -0.01345 |       |
|    |            | min(4)=                     | 5 -> 11 | -0.00440 |       |            | #CIs=34 #CIs>0=18 #CIs<0=16 |       |          |       |
|    |            | min(5)=                     | 3 -> 18 | -0.00405 |       |            |                             |       |          |       |
|    |            | #CIs=19 #CIs>0=9 #CIs<0=10  |         |          | 39    | Singlet-B1 | 36.7426                     | 33.74 | 0.0034   | 0.000 |
|    |            |                             |         |          |       | max(1)=    | 4 -> 18                     |       | 0.70094  |       |
| 36 | Singlet-B1 | 36.3011                     | 34.15   | 0.0120   | 0.000 | max(2)=    | 5 -> 16                     |       | 0.03300  |       |
|    |            | max(1)=                     | 2 -> 9  | 0.70076  |       | max(3)=    | 5 -> 21                     |       | 0.02603  |       |
|    |            | max(2)=                     | 2 -> 18 | 0.07258  |       | max(4)=    | 4 -> 33                     |       | 0.02090  |       |
|    |            | max(3)=                     | 3 -> 20 | 0.02840  |       | max(5)=    | 4 -> 22                     |       | 0.00959  |       |
|    |            | max(4)=                     | 5 -> 15 | 0.02030  |       | min(1)=    | 4 -> 9                      |       | -0.07683 |       |
|    |            | max(5)=                     | 5 -> 16 | 0.01944  |       | min(2)=    | 2 -> 9                      |       | -0.01632 |       |
|    |            | min(1)=                     | 5 -> 19 | -0.02955 |       | min(3)=    | 2 -> 22                     |       | -0.00614 |       |
|    |            | min(2)=                     | 5 -> 13 | -0.01969 |       | min(4)=    | 2 -> 28                     |       | -0.00459 |       |
|    |            | min(3)=                     | 4 -> 22 | -0.01891 |       | min(5)=    | 5 -> 25                     |       | -0.00272 |       |
|    |            | min(4)=                     | 5 -> 25 | -0.00675 |       |            | #CIs=25 #CIs>0=15 #CIs<0=10 |       |          |       |
|    |            | min(5)=                     | 5 -> 26 | -0.00375 |       |            |                             |       |          |       |
|    |            | #CIs=25 #CIs>0=15 #CIs<0=10 |         |          | 40    | Singlet-A1 | 36.8413                     | 33.65 | 0.0009   | 0.000 |
|    |            |                             |         |          |       | max(1)=    | 2 -> 10                     |       | 0.48932  |       |
| 37 | Singlet-A1 | 36.3670                     | 34.09   | 0.0146   | 0.000 | max(2)=    | 2 -> 8                      |       | 0.42051  |       |
|    |            | max(1)=                     | 2 -> 8  | 0.54910  |       | max(3)=    | 4 -> 16                     |       | 0.18502  |       |
|    |            | max(2)=                     | 2 -> 6  | 0.21403  |       | max(4)=    | 5 -> 18                     |       | 0.05012  |       |
|    |            | max(3)=                     | 2 -> 15 | 0.07624  |       | max(5)=    | 4 -> 8                      |       | 0.01275  |       |
|    |            | max(4)=                     | 3 -> 14 | 0.02803  |       | min(1)=    | 2 -> 6                      |       | -0.17958 |       |
|    |            | max(5)=                     | 5 -> 22 | 0.02250  |       | min(2)=    | 2 -> 15                     |       | -0.10338 |       |
|    |            | min(1)=                     | 2 -> 10 | -0.35381 |       | min(3)=    | 3 -> 17                     |       | -0.03379 |       |
|    |            | min(2)=                     | 2 -> 13 | -0.08652 |       | min(4)=    | 3 -> 12                     |       | -0.02664 |       |
|    |            | min(3)=                     | 4 -> 16 | -0.06861 |       | min(5)=    | 3 -> 14                     |       | -0.02294 |       |
|    |            | min(4)=                     | 2 -> 16 | -0.06769 |       |            | #CIs=41 #CIs>0=20 #CIs<0=21 |       |          |       |
|    |            | min(5)=                     | 4 -> 19 | -0.03761 |       |            |                             |       |          |       |

|    |            |                             |         |          |       |            |                             |          |        |       |
|----|------------|-----------------------------|---------|----------|-------|------------|-----------------------------|----------|--------|-------|
| 41 | Singlet-B2 | 37.3220                     | 33.22   | 0.0788   | 0.000 | max(2)=    | 2 -> 10                     | 0.17107  |        |       |
|    |            | max(1)=                     | 4 -> 17 | 0.69084  |       | max(3)=    | 3 -> 14                     | 0.11480  |        |       |
|    |            | max(2)=                     | 4 -> 12 | 0.08905  |       | max(4)=    | 3 -> 12                     | 0.08843  |        |       |
|    |            | max(3)=                     | 4 -> 14 | 0.04788  |       | max(5)=    | 2 -> 15                     | 0.05726  |        |       |
|    |            | max(4)=                     | 3 -> 15 | 0.02994  |       | min(1)=    | 4 -> 16                     | -0.33921 |        |       |
|    |            | max(5)=                     | 4 -> 24 | 0.02886  |       | min(2)=    | 5 -> 18                     | -0.28845 |        |       |
|    |            | min(1)=                     | 2 -> 12 | -0.06707 |       | min(3)=    | 2 -> 13                     | -0.19975 |        |       |
|    |            | min(2)=                     | 2 -> 11 | -0.04041 |       | min(4)=    | 2 -> 6                      | -0.02528 |        |       |
|    |            | min(3)=                     | 2 -> 7  | -0.03286 |       | min(5)=    | 4 -> 19                     | -0.02193 |        |       |
|    |            | min(4)=                     | 5 -> 20 | -0.03012 |       |            | #CIs=43 #CIs>0=20 #CIs<0=23 |          |        |       |
|    |            | min(5)=                     | 3 -> 16 | -0.02383 |       |            |                             |          |        |       |
|    |            | #CIs=34 #CIs>0=18 #CIs<0=16 |         |          | 45    | Singlet-B2 | 40.2449                     | 30.81    | 0.0363 | 0.000 |
|    |            |                             |         |          |       | max(1)=    | 3 -> 16                     | 0.67925  |        |       |
| 42 | Singlet-A1 | 38.6380                     | 32.09   | 0.0004   | 0.000 | max(2)=    | 2 -> 12                     | 0.08501  |        |       |
|    |            | max(1)=                     | 2 -> 13 | 0.65792  |       | max(3)=    | 3 -> 15                     | 0.06213  |        |       |
|    |            | max(2)=                     | 2 -> 6  | 0.10789  |       | max(4)=    | 3 -> 8                      | 0.06127  |        |       |
|    |            | max(3)=                     | 2 -> 8  | 0.08301  |       | max(5)=    | 2 -> 14                     | 0.04825  |        |       |
|    |            | max(4)=                     | 3 -> 17 | 0.08141  |       | min(1)=    | 5 -> 20                     | -0.12247 |        |       |
|    |            | max(5)=                     | 2 -> 10 | 0.06139  |       | min(2)=    | 3 -> 10                     | -0.03104 |        |       |
|    |            | min(1)=                     | 4 -> 16 | -0.14605 |       | min(3)=    | 3 -> 19                     | -0.02494 |        |       |
|    |            | min(2)=                     | 5 -> 18 | -0.11390 |       | min(4)=    | 3 -> 25                     | -0.01723 |        |       |
|    |            | min(3)=                     | 2 -> 15 | -0.03051 |       | min(5)=    | 2 -> 23                     | -0.01113 |        |       |
|    |            | min(4)=                     | 2 -> 16 | -0.01659 |       |            | #CIs=33 #CIs>0=22 #CIs<0=11 |          |        |       |
|    |            | min(5)=                     | 5 -> 22 | -0.00695 |       |            |                             |          |        |       |
|    |            | #CIs=40 #CIs>0=22 #CIs<0=18 |         |          | 46    | Singlet-A2 | 41.1640                     | 30.12    | 0.0000 | 0.000 |
|    |            |                             |         |          |       | max(1)=    | 3 -> 18                     | 0.70202  |        |       |
| 43 | Singlet-B2 | 38.7323                     | 32.01   | 0.0186   | 0.000 | max(2)=    | 3 -> 22                     | 0.02970  |        |       |
|    |            | max(1)=                     | 2 -> 12 | 0.61562  |       | max(3)=    | 3 -> 33                     | 0.01811  |        |       |
|    |            | max(2)=                     | 2 -> 11 | 0.24977  |       | max(4)=    | 2 -> 20                     | 0.01617  |        |       |
|    |            | max(3)=                     | 2 -> 7  | 0.17607  |       | max(5)=    | 5 -> 17                     | 0.00505  |        |       |
|    |            | max(4)=                     | 4 -> 17 | 0.07587  |       | min(1)=    | 3 -> 9                      | -0.07295 |        |       |
|    |            | max(5)=                     | 2 -> 14 | 0.03229  |       | min(2)=    | 4 -> 20                     | -0.01673 |        |       |
|    |            | min(1)=                     | 3 -> 16 | -0.10873 |       | min(3)=    | 2 -> 29                     | -0.00612 |        |       |
|    |            | min(2)=                     | 2 -> 17 | -0.07037 |       | min(4)=    | 5 -> 14                     | -0.00225 |        |       |
|    |            | min(3)=                     | 5 -> 20 | -0.04642 |       | min(5)=    | 5 -> 24                     | -0.00196 |        |       |
|    |            | min(4)=                     | 3 -> 8  | -0.02409 |       |            | #CIs=19 #CIs>0=11 #CIs<0=8  |          |        |       |
|    |            | min(5)=                     | 3 -> 10 | -0.01045 |       |            |                             |          |        |       |
|    |            | #CIs=35 #CIs>0=18 #CIs<0=17 |         |          | 47    | Singlet-B1 | 41.8180                     | 29.65    | 0.0008 | 0.000 |
|    |            |                             |         |          |       | max(1)=    | 5 -> 19                     | 0.70008  |        |       |
| 44 | Singlet-A1 | 39.7527                     | 31.19   | 0.0544   | 0.000 | max(2)=    | 5 -> 21                     | 0.07691  |        |       |
|    |            | max(1)=                     | 3 -> 17 | 0.44723  |       | max(3)=    | 2 -> 9                      | 0.02496  |        |       |



|    |            |         |                             |         |          |       |                             |         |          |        |       |  |
|----|------------|---------|-----------------------------|---------|----------|-------|-----------------------------|---------|----------|--------|-------|--|
|    |            |         | max(4)=                     | 5 -> 30 | 0.02382  |       | min(1)=                     | 2 -> 20 | -0.02901 |        |       |  |
|    |            |         | max(5)=                     | 5 -> 15 | 0.02338  |       | min(2)=                     | 3 -> 22 | -0.01984 |        |       |  |
|    |            |         | min(1)=                     | 5 -> 13 | -0.02516 |       | min(3)=                     | 5 -> 17 | -0.00404 |        |       |  |
|    |            |         | min(2)=                     | 4 -> 22 | -0.01895 |       | min(4)=                     | 3 -> 28 | -0.00155 |        |       |  |
|    |            |         | min(3)=                     | 5 -> 31 | -0.00968 |       | min(5)=                     | 5 -> 12 | -0.00091 |        |       |  |
|    |            |         | min(4)=                     | 4 -> 18 | -0.00468 |       | #CIs=19 #CIs>0=12 #CIs<0=7  |         |          |        |       |  |
|    |            |         | min(5)=                     | 2 -> 28 | -0.00075 |       |                             |         |          |        |       |  |
|    |            |         | #CIs=26 #CIs>0=19 #CIs<0=7  |         |          | 51    | Singlet-B1                  | 44.9045 | 27.61    | 0.1799 | 0.000 |  |
|    |            |         |                             |         |          |       | max(1)=                     | 5 -> 21 | 0.68550  |        |       |  |
| 48 | Singlet-B2 | 43.8497 |                             | 28.27   | 0.6294   | 0.000 | max(2)=                     | 4 -> 22 | 0.05002  |        |       |  |
|    |            |         | max(1)=                     | 5 -> 20 | 0.67056  |       | max(3)=                     | 2 -> 18 | 0.03913  |        |       |  |
|    |            |         | max(2)=                     | 3 -> 19 | 0.14827  |       | max(4)=                     | 5 -> 10 | 0.02225  |        |       |  |
|    |            |         | max(3)=                     | 3 -> 16 | 0.10714  |       | max(5)=                     | 5 -> 26 | 0.01838  |        |       |  |
|    |            |         | max(4)=                     | 3 -> 15 | 0.07597  |       | min(1)=                     | 3 -> 20 | -0.12507 |        |       |  |
|    |            |         | max(5)=                     | 2 -> 12 | 0.06606  |       | min(2)=                     | 5 -> 19 | -0.07038 |        |       |  |
|    |            |         | min(1)=                     | 3 -> 25 | -0.02200 |       | min(3)=                     | 5 -> 16 | -0.04001 |        |       |  |
|    |            |         | min(2)=                     | 2 -> 11 | -0.01317 |       | min(4)=                     | 5 -> 13 | -0.03376 |        |       |  |
|    |            |         | min(3)=                     | 4 -> 11 | -0.01310 |       | min(5)=                     | 4 -> 18 | -0.02401 |        |       |  |
|    |            |         | min(4)=                     | 3 -> 10 | -0.01190 |       | #CIs=26 #CIs>0=11 #CIs<0=15 |         |          |        |       |  |
|    |            |         | min(5)=                     | 2 -> 24 | -0.01105 |       |                             |         |          |        |       |  |
|    |            |         | #CIs=35 #CIs>0=23 #CIs<0=12 |         |          | 52    | Singlet-B2                  | 45.9796 | 26.97    | 0.0095 | 0.000 |  |
|    |            |         |                             |         |          |       | max(1)=                     | 2 -> 14 | 0.67546  |        |       |  |
| 49 | Singlet-A1 | 44.4780 |                             | 27.88   | 0.3529   | 0.000 | max(2)=                     | 2 -> 11 | 0.16138  |        |       |  |
|    |            |         | max(1)=                     | 4 -> 19 | 0.54294  |       | max(3)=                     | 3 -> 15 | 0.01766  |        |       |  |
|    |            |         | max(2)=                     | 4 -> 21 | 0.28533  |       | max(4)=                     | 4 -> 23 | 0.01378  |        |       |  |
|    |            |         | max(3)=                     | 5 -> 22 | 0.10177  |       | max(5)=                     | 3 -> 10 | 0.01057  |        |       |  |
|    |            |         | max(4)=                     | 2 -> 15 | 0.05775  |       | min(1)=                     | 2 -> 12 | -0.10786 |        |       |  |
|    |            |         | max(5)=                     | 3 -> 14 | 0.04971  |       | min(2)=                     | 3 -> 16 | -0.04498 |        |       |  |
|    |            |         | min(1)=                     | 3 -> 17 | -0.25462 |       | min(3)=                     | 2 -> 24 | -0.03800 |        |       |  |
|    |            |         | min(2)=                     | 4 -> 16 | -0.13944 |       | min(4)=                     | 2 -> 17 | -0.02782 |        |       |  |
|    |            |         | min(3)=                     | 5 -> 18 | -0.12350 |       | min(5)=                     | 4 -> 17 | -0.02396 |        |       |  |
|    |            |         | min(4)=                     | 4 -> 13 | -0.03786 |       | #CIs=35 #CIs>0=17 #CIs<0=18 |         |          |        |       |  |
|    |            |         | min(5)=                     | 2 -> 13 | -0.03007 |       |                             |         |          |        |       |  |
|    |            |         | #CIs=43 #CIs>0=24 #CIs<0=19 |         |          | 53    | Singlet-A1                  | 46.2190 | 26.83    | 0.2598 | 0.000 |  |
|    |            |         |                             |         |          |       | max(1)=                     | 2 -> 15 | 0.35197  |        |       |  |
| 50 | Singlet-A2 | 44.8370 |                             | 27.65   | 0.0000   | 0.000 | max(2)=                     | 4 -> 21 | 0.26330  |        |       |  |
|    |            |         | max(1)=                     | 4 -> 20 | 0.70534  |       | max(3)=                     | 2 -> 10 | 0.14142  |        |       |  |
|    |            |         | max(2)=                     | 4 -> 29 | 0.02893  |       | max(4)=                     | 2 -> 25 | 0.02856  |        |       |  |
|    |            |         | max(3)=                     | 3 -> 18 | 0.01829  |       | max(5)=                     | 5 -> 28 | 0.02179  |        |       |  |
|    |            |         | max(4)=                     | 2 -> 29 | 0.00567  |       | min(1)=                     | 4 -> 19 | -0.36965 |        |       |  |
|    |            |         | max(5)=                     | 5 -> 27 | 0.00497  |       | min(2)=                     | 3 -> 17 | -0.30946 |        |       |  |

|    |            |                             |         |          |       |            |                             |         |          |       |  |
|----|------------|-----------------------------|---------|----------|-------|------------|-----------------------------|---------|----------|-------|--|
|    |            | min(3)=                     | 5 -> 22 | -0.13103 |       |            | min(5)=                     | 5 -> 16 | -0.01731 |       |  |
|    |            | min(4)=                     | 4 -> 16 | -0.12079 |       |            | #CIs=25 #CIs>0=16 #CIs<0=9  |         |          |       |  |
|    |            | min(5)=                     | 5 -> 18 | -0.12025 |       |            |                             |         |          |       |  |
|    |            | #CIs=43 #CIs>0=15 #CIs<0=28 |         |          | 57    | Singlet-A1 | 50.0322                     | 24.78   | 0.4859   | 0.000 |  |
|    |            |                             |         |          |       |            | max(1)=                     | 5 -> 22 | 0.46561  |       |  |
| 54 | Singlet-A1 | 47.2925                     | 26.22   | 0.0000   | 0.000 |            | max(2)=                     | 2 -> 21 | 0.04067  |       |  |
|    |            | max(1)=                     | 2 -> 15 | 0.46747  |       |            | max(3)=                     | 3 -> 12 | 0.02742  |       |  |
|    |            | max(2)=                     | 5 -> 22 | 0.23390  |       |            | max(4)=                     | 2 -> 10 | 0.02302  |       |  |
|    |            | max(3)=                     | 4 -> 19 | 0.11667  |       |            | max(5)=                     | 4 -> 8  | 0.02256  |       |  |
|    |            | max(4)=                     | 2 -> 10 | 0.09411  |       |            | min(1)=                     | 2 -> 15 | -0.31405 |       |  |
|    |            | max(5)=                     | 2 -> 25 | 0.02660  |       |            | min(2)=                     | 3 -> 17 | -0.25054 |       |  |
|    |            | min(1)=                     | 4 -> 21 | -0.44386 |       |            | min(3)=                     | 4 -> 19 | -0.19490 |       |  |
|    |            | min(2)=                     | 3 -> 17 | -0.04212 |       |            | min(4)=                     | 5 -> 18 | -0.18599 |       |  |
|    |            | min(3)=                     | 2 -> 16 | -0.03702 |       |            | min(5)=                     | 4 -> 16 | -0.13515 |       |  |
|    |            | min(4)=                     | 5 -> 28 | -0.02029 |       |            | #CIs=41 #CIs>0=18 #CIs<0=23 |         |          |       |  |
|    |            | min(5)=                     | 2 -> 19 | -0.02012 |       |            |                             |         |          |       |  |
|    |            | #CIs=41 #CIs>0=21 #CIs<0=20 |         |          | 58    | Singlet-A1 | 50.7723                     | 24.42   | 0.5155   | 0.000 |  |
|    |            |                             |         |          |       |            | max(1)=                     | 5 -> 22 | 0.43907  |       |  |
| 55 | Singlet-B2 | 48.8593                     | 25.38   | 0.5023   | 0.000 |            | max(2)=                     | 4 -> 21 | 0.35649  |       |  |
|    |            | max(1)=                     | 3 -> 19 | 0.68478  |       |            | max(3)=                     | 3 -> 17 | 0.22464  |       |  |
|    |            | max(2)=                     | 2 -> 23 | 0.04075  |       |            | max(4)=                     | 5 -> 18 | 0.17803  |       |  |
|    |            | max(3)=                     | 3 -> 25 | 0.03362  |       |            | max(5)=                     | 4 -> 16 | 0.17007  |       |  |
|    |            | max(4)=                     | 5 -> 29 | 0.01928  |       |            | min(1)=                     | 3 -> 14 | -0.08888 |       |  |
|    |            | max(5)=                     | 4 -> 11 | 0.01174  |       |            | min(2)=                     | 4 -> 19 | -0.07601 |       |  |
|    |            | min(1)=                     | 5 -> 20 | -0.13906 |       |            | min(3)=                     | 3 -> 24 | -0.06889 |       |  |
|    |            | min(2)=                     | 4 -> 14 | -0.04404 |       |            | min(4)=                     | 2 -> 21 | -0.06757 |       |  |
|    |            | min(3)=                     | 2 -> 12 | -0.03880 |       |            | min(5)=                     | 4 -> 15 | -0.04139 |       |  |
|    |            | min(4)=                     | 4 -> 24 | -0.03616 |       |            | #CIs=42 #CIs>0=21 #CIs<0=21 |         |          |       |  |
|    |            | min(5)=                     | 4 -> 23 | -0.03296 |       |            |                             |         |          |       |  |
|    |            | #CIs=36 #CIs>0=18 #CIs<0=18 |         |          | 59    | Singlet-B2 | 51.1934                     | 24.22   | 0.0677   | 0.000 |  |
|    |            |                             |         |          |       |            | max(1)=                     | 3 -> 21 | 0.70073  |       |  |
| 56 | Singlet-B1 | 49.3378                     | 25.13   | 0.4700   | 0.000 |            | max(2)=                     | 2 -> 17 | 0.07312  |       |  |
|    |            | max(1)=                     | 3 -> 20 | 0.66290  |       |            | max(3)=                     | 3 -> 19 | 0.02049  |       |  |
|    |            | max(2)=                     | 4 -> 22 | 0.20740  |       |            | max(4)=                     | 3 -> 26 | 0.01697  |       |  |
|    |            | max(3)=                     | 5 -> 21 | 0.09872  |       |            | max(5)=                     | 3 -> 10 | 0.01441  |       |  |
|    |            | max(4)=                     | 2 -> 18 | 0.04911  |       |            | min(1)=                     | 3 -> 13 | -0.03992 |       |  |
|    |            | max(5)=                     | 2 -> 22 | 0.03564  |       |            | min(2)=                     | 3 -> 16 | -0.01375 |       |  |
|    |            | min(1)=                     | 5 -> 15 | -0.02663 |       |            | min(3)=                     | 4 -> 24 | -0.01175 |       |  |
|    |            | min(2)=                     | 2 -> 9  | -0.02621 |       |            | min(4)=                     | 3 -> 30 | -0.01132 |       |  |
|    |            | min(3)=                     | 5 -> 19 | -0.02558 |       |            | min(5)=                     | 2 -> 14 | -0.00923 |       |  |
|    |            | min(4)=                     | 4 -> 28 | -0.02424 |       |            | #CIs=34 #CIs>0=18 #CIs<0=16 |         |          |       |  |

|    |            |         |       |         |       |         |           |           |
|----|------------|---------|-------|---------|-------|---------|-----------|-----------|
| 60 | Singlet-B1 | 52.1627 | 23.77 | 1.0346  | 0.000 | min(1)= | 3 -> 20   | -0.18318  |
|    | max(1)=    | 4 -> 22 |       | 0.66714 |       | min(2)= | 2 -> 18   | -0.09098  |
|    | max(2)=    | 2 -> 9  |       | 0.03462 |       | min(3)= | 5 -> 21   | -0.07206  |
|    | max(3)=    | 5 -> 19 |       | 0.03070 |       | min(4)= | 5 -> 25   | -0.05107  |
|    | max(4)=    | 5 -> 15 |       | 0.03017 |       | min(5)= | 2 -> 22   | -0.02926  |
|    | max(5)=    | 5 -> 16 |       | 0.02095 |       | #CIs=25 | #CIs>0=10 | #CIs<0=15 |

## 8 H<sub>2</sub>S

### 8.1 6-311G(d,p)

#### 8.1.1 Plots

Figure S11: For H<sub>2</sub>S molecule and 6-311G(d,p) basis set, variation of  $\alpha_{ZZ}$  (top) and  $\beta_{ZZZ}$  (bottom) with respect to the number of orbitals (FIOs decomposition presented in this work, in Plots S11a and S11c) or states (SOS approaches, in Plots S11b and S11d). For  $\alpha$  FIOs, three approaches were considered: CPKS (CAM-B3LYP), CPHF and UPHF. For  $\beta$  FIOs, the results of CPKS and CPHF approaches are provided. All elements of the  $\beta$  tensor were recomputed with an error less than 0.02 au in the case of the FIOs. For SOS approach, TDDFT (CAM-B3LYP) and CIS methods were employed. Recomputed values of  $\alpha_{ZZ}$  and  $\beta_{ZZZ}$  for the different approaches are included in each plot. HOMO (H) and LUMO (L) are represented by blue and pink dotted lines, respectively.

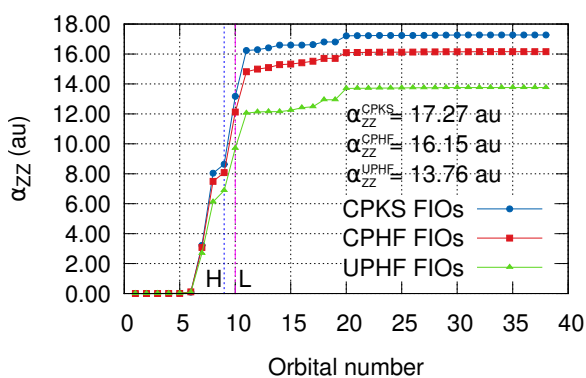

(a) CPKS-, CPHF- and UPHF-FIOs decomposition of  $\alpha_{ZZ}$  into MOs.

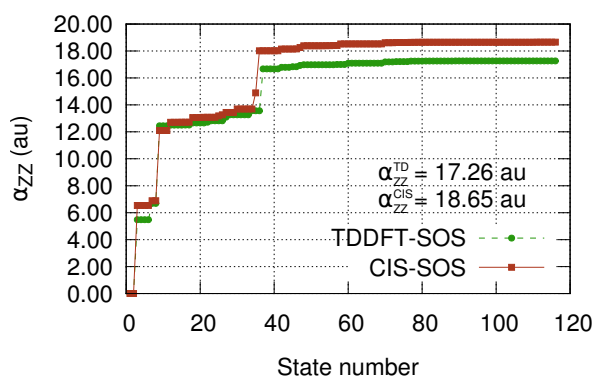

(b) TDDFT- and CIS-SOS decomposition of  $\alpha_{ZZ}$  into states.

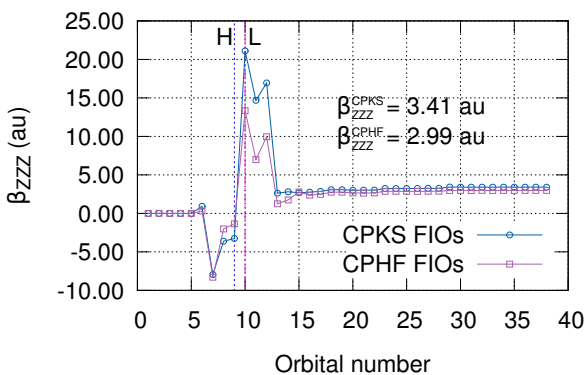

(c) CPKS- and CPHF-FIOs decomposition of  $\beta_{ZZZ}$  into MOs.

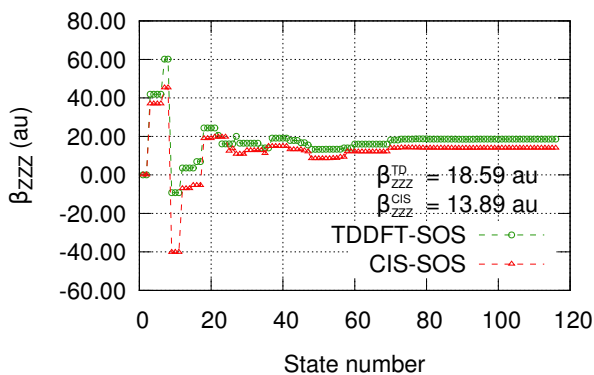

(d) TDDFT- and CIS-SOS decomposition of  $\beta_{ZZZ}$  into states.

## 8.1.2 Main contributions from different excited states at TDDFT (CAM-B3LYP) approach

| #_exc.st | ___symm___ | Exc.E        | Osc._Strength | ___f___ | <S**2>_    | min(4)=    | 8 -> 17      | -0.01946     |       |  |
|----------|------------|--------------|---------------|---------|------------|------------|--------------|--------------|-------|--|
| 1        | Singlet-A2 | 6.1367       | 202.04        | 0.0000  | 0.000      | min(5)=    | 6 -> 13      | -0.00962     |       |  |
|          |            |              |               |         |            | #states=38 | #states>0=18 | #states<0=20 |       |  |
|          | max(1)=    | 9 -> 11      | 0.70435       |         |            |            |              |              |       |  |
|          | max(2)=    | 9 -> 12      | 0.01945       | 4       | Singlet-A2 | 9.9884     | 124.13       | 0.0000       | 0.000 |  |
|          | max(3)=    | 6 -> 19      | 0.00681       |         |            | max(1)=    | 9 -> 12      | 0.70624      |       |  |
|          | max(4)=    | 8 -> 19      | 0.00487       |         |            | max(2)=    | 9 -> 22      | 0.01446      |       |  |
|          | max(5)=    | 9 -> 27      | 0.00433       |         |            | max(3)=    | 9 -> 27      | 0.00631      |       |  |
|          | min(1)=    | 9 -> 16      | -0.06033      |         |            | max(4)=    | 6 -> 19      | 0.00130      |       |  |
|          | min(2)=    | 9 -> 22      | -0.00621      |         |            | max(5)=    | 9 -> 33      | 0.00092      |       |  |
|          | min(3)=    | 7 -> 14      | -0.00595      |         |            | min(1)=    | 9 -> 16      | -0.02251     |       |  |
|          | min(4)=    | 8 -> 24      | -0.00203      |         |            | min(2)=    | 9 -> 11      | -0.02132     |       |  |
|          | min(5)=    | 9 -> 23      | -0.00147      |         |            | min(3)=    | 9 -> 23      | -0.00530     |       |  |
|          | #states=18 | #states>0=7  | #states<0=11  |         |            | min(4)=    | 7 -> 14      | -0.00178     |       |  |
|          |            |              |               |         |            | min(5)=    | 9 -> 31      | -0.00140     |       |  |
| 2        | Singlet-B1 | 6.6231       | 187.20        | 0.0300  | 0.000      | #states=18 | #states>0=8  | #states<0=10 |       |  |
|          | max(1)=    | 9 -> 10      | 0.70574       |         |            |            |              |              |       |  |
|          | max(2)=    | 9 -> 13      | 0.03158       | 5       | Singlet-B2 | 10.0186    | 123.75       | 0.1793       | 0.000 |  |
|          | max(3)=    | 9 -> 21      | 0.01189       |         |            | max(1)=    | 8 -> 11      | 0.68078      |       |  |
|          | max(4)=    | 6 -> 20      | 0.00537       |         |            | max(2)=    | 7 -> 15      | 0.06911      |       |  |
|          | max(5)=    | 6 -> 14      | 0.00458       |         |            | max(3)=    | 9 -> 19      | 0.05056      |       |  |
|          | min(1)=    | 9 -> 17      | -0.02781      |         |            | max(4)=    | 8 -> 12      | 0.01396      |       |  |
|          | min(2)=    | 9 -> 15      | -0.02244      |         |            | max(5)=    | 7 -> 13      | 0.01266      |       |  |
|          | min(3)=    | 7 -> 19      | -0.01261      |         |            | min(1)=    | 7 -> 10      | -0.17246     |       |  |
|          | min(4)=    | 8 -> 20      | -0.01088      |         |            | min(2)=    | 7 -> 18      | -0.02942     |       |  |
|          | min(5)=    | 6 -> 25      | -0.00237      |         |            | min(3)=    | 6 -> 12      | -0.01983     |       |  |
|          | #states=24 | #states>0=15 | #states<0=9   |         |            | min(4)=    | 6 -> 11      | -0.01752     |       |  |
|          |            |              |               |         |            | min(5)=    | 8 -> 16      | -0.00745     |       |  |
| 3        | Singlet-A1 | 9.6042       | 129.09        | 0.2275  | 0.000      | #states=32 | #states>0=13 | #states<0=19 |       |  |
|          | max(1)=    | 8 -> 10      | 0.69458       |         |            |            |              |              |       |  |
|          | max(2)=    | 7 -> 16      | 0.02000       | 6       | Singlet-B1 | 10.4787    | 118.32       | 0.0018       | 0.000 |  |
|          | max(3)=    | 8 -> 18      | 0.00994       |         |            | max(1)=    | 9 -> 13      | 0.70295      |       |  |
|          | max(4)=    | 6 -> 10      | 0.00497       |         |            | max(2)=    | 8 -> 20      | 0.01254      |       |  |
|          | max(5)=    | 9 -> 20      | 0.00479       |         |            | max(3)=    | 9 -> 26      | 0.00918      |       |  |
|          | min(1)=    | 7 -> 11      | -0.11848      |         |            | max(4)=    | 7 -> 19      | 0.00867      |       |  |
|          | min(2)=    | 9 -> 14      | -0.04780      |         |            | max(5)=    | 9 -> 17      | 0.00596      |       |  |
|          | min(3)=    | 8 -> 15      | -0.02088      |         |            | min(1)=    | 9 -> 15      | -0.06523     |       |  |

|   |            |                                      |         |          |       |  |                                      |                                      |          |          |       |  |
|---|------------|--------------------------------------|---------|----------|-------|--|--------------------------------------|--------------------------------------|----------|----------|-------|--|
|   |            | min(2)=                              | 9 -> 10 | -0.03329 |       |  |                                      | min(4)=                              | 8 -> 26  | -0.01105 |       |  |
|   |            | min(3)=                              | 8 -> 14 | -0.01451 |       |  |                                      | min(5)=                              | 6 -> 18  | -0.00936 |       |  |
|   |            | min(4)=                              | 6 -> 14 | -0.00557 |       |  |                                      | #states=37 #states>0=18 #states<0=19 |          |          |       |  |
|   |            | min(5)=                              | 9 -> 18 | -0.00470 |       |  |                                      |                                      |          |          |       |  |
|   |            | #states=24 #states>0=9 #states<0=15  |         |          | 10    |  | Singlet-B2                           | 12.8738                              | 96.31    | 0.0017   | 0.000 |  |
|   |            |                                      |         |          |       |  | max(1)=                              | 8 -> 12                              | 0.69998  |          |       |  |
| 7 | Singlet-A1 | 11.6289                              | 106.62  | 0.0737   | 0.000 |  | max(2)=                              | 8 -> 22                              | 0.01414  |          |       |  |
|   |            | max(1)=                              | 9 -> 14 | 0.61895  |       |  | max(3)=                              | 8 -> 27                              | 0.00623  |          |       |  |
|   |            | max(2)=                              | 6 -> 10 | 0.03172  |       |  | max(4)=                              | 6 -> 12                              | 0.00507  |          |       |  |
|   |            | max(3)=                              | 7 -> 16 | 0.00892  |       |  | max(5)=                              | 7 -> 30                              | 0.00196  |          |       |  |
|   |            | max(4)=                              | 6 -> 13 | 0.00629  |       |  | min(1)=                              | 7 -> 10                              | -0.07937 |          |       |  |
|   |            | max(5)=                              | 7 -> 23 | 0.00425  |       |  | min(2)=                              | 8 -> 16                              | -0.03786 |          |       |  |
|   |            | min(1)=                              | 7 -> 11 | -0.27824 |       |  | min(3)=                              | 8 -> 11                              | -0.03488 |          |       |  |
|   |            | min(2)=                              | 8 -> 13 | -0.16962 |       |  | min(4)=                              | 6 -> 11                              | -0.02195 |          |       |  |
|   |            | min(3)=                              | 7 -> 12 | -0.09646 |       |  | min(5)=                              | 7 -> 13                              | -0.01772 |          |       |  |
|   |            | min(4)=                              | 9 -> 20 | -0.01636 |       |  | #states=32 #states>0=14 #states<0=18 |                                      |          |          |       |  |
|   |            | min(5)=                              | 8 -> 18 | -0.01285 |       |  |                                      |                                      |          |          |       |  |
|   |            | #states=38 #states>0=17 #states<0=21 |         |          | 11    |  | Singlet-B1                           | 13.8437                              | 89.56    | 0.1843   | 0.000 |  |
|   |            |                                      |         |          |       |  | max(1)=                              | 8 -> 14                              | 0.53160  |          |       |  |
| 8 | Singlet-B2 | 12.0005                              | 103.32  | 0.6273   | 0.000 |  | max(2)=                              | 6 -> 14                              | 0.01835  |          |       |  |
|   |            | max(1)=                              | 7 -> 10 | 0.67641  |       |  | max(3)=                              | 9 -> 18                              | 0.01185  |          |       |  |
|   |            | max(2)=                              | 8 -> 11 | 0.16647  |       |  | max(4)=                              | 6 -> 20                              | 0.00908  |          |       |  |
|   |            | max(3)=                              | 8 -> 12 | 0.08854  |       |  | max(5)=                              | 9 -> 21                              | 0.00544  |          |       |  |
|   |            | max(4)=                              | 7 -> 13 | 0.07661  |       |  | min(1)=                              | 9 -> 15                              | -0.46366 |          |       |  |
|   |            | max(5)=                              | 8 -> 16 | 0.02615  |       |  | min(2)=                              | 9 -> 13                              | -0.03214 |          |       |  |
|   |            | min(1)=                              | 6 -> 12 | -0.02424 |       |  | min(3)=                              | 7 -> 19                              | -0.02046 |          |       |  |
|   |            | min(2)=                              | 7 -> 18 | -0.01118 |       |  | min(4)=                              | 8 -> 20                              | -0.01625 |          |       |  |
|   |            | min(3)=                              | 6 -> 16 | -0.01006 |       |  | min(5)=                              | 9 -> 10                              | -0.01399 |          |       |  |
|   |            | min(4)=                              | 7 -> 17 | -0.00643 |       |  | #states=24 #states>0=15 #states<0=9  |                                      |          |          |       |  |
|   |            | min(5)=                              | 7 -> 21 | -0.00473 |       |  |                                      |                                      |          |          |       |  |
|   |            | #states=31 #states>0=15 #states<0=16 |         |          | 12    |  | Singlet-A1                           | 13.9451                              | 88.91    | 0.0047   | 0.000 |  |
|   |            |                                      |         |          |       |  | max(1)=                              | 8 -> 13                              | 0.59095  |          |       |  |
| 9 | Singlet-A1 | 12.5786                              | 98.57   | 0.4102   | 0.000 |  | max(2)=                              | 9 -> 14                              | 0.19051  |          |       |  |
|   |            | max(1)=                              | 7 -> 11 | 0.60443  |       |  | max(3)=                              | 7 -> 11                              | 0.15729  |          |       |  |
|   |            | max(2)=                              | 9 -> 14 | 0.20389  |       |  | max(4)=                              | 8 -> 15                              | 0.10214  |          |       |  |
|   |            | max(3)=                              | 8 -> 10 | 0.11705  |       |  | max(5)=                              | 8 -> 10                              | 0.04891  |          |       |  |
|   |            | max(4)=                              | 8 -> 15 | 0.10692  |       |  | min(1)=                              | 7 -> 12                              | -0.27337 |          |       |  |
|   |            | max(5)=                              | 9 -> 20 | 0.03894  |       |  | min(2)=                              | 8 -> 17                              | -0.01889 |          |       |  |
|   |            | min(1)=                              | 8 -> 13 | -0.25663 |       |  | min(3)=                              | 6 -> 17                              | -0.01885 |          |       |  |
|   |            | min(2)=                              | 6 -> 13 | -0.02392 |       |  | min(4)=                              | 7 -> 22                              | -0.01405 |          |       |  |
|   |            | min(3)=                              | 6 -> 17 | -0.01535 |       |  | min(5)=                              | 7 -> 27                              | -0.00716 |          |       |  |

|    |            |                                      |         |            |         |                                      |         |          |
|----|------------|--------------------------------------|---------|------------|---------|--------------------------------------|---------|----------|
|    |            | #states=38 #states>0=20 #states<0=18 | 16      | Singlet-A1 | 16.0085 | 77.45                                | 0.0009  | 0.000    |
|    |            |                                      |         |            | max(1)= | 7 -> 12                              | 0.57083 |          |
| 13 | Singlet-B1 | 14.1832                              | 87.42   | 0.2250     | 0.000   | max(2)=                              | 8 -> 15 | 0.35091  |
|    |            | max(1)=                              | 9 -> 15 | 0.52432    |         | max(3)=                              | 8 -> 13 | 0.17185  |
|    |            | max(2)=                              | 8 -> 14 | 0.46534    |         | max(4)=                              | 9 -> 14 | 0.12202  |
|    |            | max(3)=                              | 9 -> 13 | 0.05775    |         | max(5)=                              | 6 -> 10 | 0.04200  |
|    |            | max(4)=                              | 8 -> 20 | 0.04483    |         | min(1)=                              | 8 -> 18 | -0.03258 |
|    |            | max(5)=                              | 7 -> 19 | 0.04155    |         | min(2)=                              | 9 -> 20 | -0.03232 |
|    |            | min(1)=                              | 6 -> 14 | -0.02960   |         | min(3)=                              | 8 -> 17 | -0.03155 |
|    |            | min(2)=                              | 9 -> 21 | -0.02388   |         | min(4)=                              | 7 -> 11 | -0.03142 |
|    |            | min(3)=                              | 9 -> 18 | -0.01792   |         | min(5)=                              | 7 -> 16 | -0.02785 |
|    |            | min(4)=                              | 6 -> 20 | -0.00930   |         |                                      |         |          |
|    |            | min(5)=                              | 9 -> 30 | -0.00580   |         | #states=38 #states>0=20 #states<0=18 |         |          |
|    |            | #states=24 #states>0=11 #states<0=13 | 17      | Singlet-A2 | 16.2374 | 76.36                                | 0.0000  | 0.000    |
|    |            |                                      |         |            |         | max(1)=                              | 7 -> 14 | 0.70622  |
| 14 | Singlet-A2 | 15.1065                              | 82.07   | 0.0000     | 0.000   | max(2)=                              | 8 -> 19 | 0.00674  |
|    |            | max(1)=                              | 9 -> 16 | 0.70316    |         | max(3)=                              | 7 -> 28 | 0.00559  |
|    |            | max(2)=                              | 9 -> 11 | 0.05995    |         | max(4)=                              | 9 -> 11 | 0.00308  |
|    |            | max(3)=                              | 7 -> 14 | 0.03194    |         | max(5)=                              | 6 -> 19 | 0.00217  |
|    |            | max(4)=                              | 9 -> 12 | 0.02405    |         | min(1)=                              | 9 -> 16 | -0.03229 |
|    |            | max(5)=                              | 9 -> 22 | 0.01650    |         | min(2)=                              | 7 -> 25 | -0.01078 |
|    |            | min(1)=                              | 9 -> 27 | -0.00944   |         | min(3)=                              | 8 -> 24 | -0.00266 |
|    |            | min(2)=                              | 6 -> 19 | -0.00574   |         | min(4)=                              | 9 -> 22 | -0.00226 |
|    |            | min(3)=                              | 8 -> 19 | -0.00331   |         | min(5)=                              | 9 -> 31 | -0.00055 |
|    |            | min(4)=                              | 9 -> 31 | -0.00254   |         |                                      |         |          |
|    |            | min(5)=                              | 6 -> 24 | -0.00074   |         | #states=18 #states>0=11 #states<0=7  |         |          |
|    |            | #states=18 #states>0=13 #states<0=5  | 18      | Singlet-A1 | 17.0906 | 72.55                                | 0.0194  | 0.000    |
|    |            |                                      |         |            |         | max(1)=                              | 8 -> 15 | 0.58020  |
| 15 | Singlet-B2 | 15.7316                              | 78.81   | 0.0116     | 0.000   | max(2)=                              | 6 -> 17 | 0.04129  |
|    |            | max(1)=                              | 7 -> 13 | 0.69939    |         | max(3)=                              | 8 -> 21 | 0.02503  |
|    |            | max(2)=                              | 6 -> 12 | 0.01545    |         | max(4)=                              | 6 -> 15 | 0.01573  |
|    |            | max(3)=                              | 7 -> 18 | 0.01182    |         | max(5)=                              | 9 -> 28 | 0.01180  |
|    |            | max(4)=                              | 7 -> 21 | 0.00913    |         | min(1)=                              | 7 -> 12 | -0.29133 |
|    |            | max(5)=                              | 7 -> 26 | 0.00771    |         | min(2)=                              | 8 -> 13 | -0.15155 |
|    |            | min(1)=                              | 7 -> 10 | -0.07038   |         | min(3)=                              | 9 -> 14 | -0.12753 |
|    |            | min(2)=                              | 7 -> 15 | -0.04752   |         | min(4)=                              | 7 -> 11 | -0.11240 |
|    |            | min(3)=                              | 6 -> 11 | -0.03661   |         | min(5)=                              | 6 -> 10 | -0.11115 |
|    |            | min(4)=                              | 8 -> 16 | -0.02901   |         |                                      |         |          |
|    |            | min(5)=                              | 8 -> 11 | -0.02597   |         | #states=38 #states>0=15 #states<0=23 |         |          |
|    |            | #states=30 #states>0=15 #states<0=15 | 19      | Singlet-B2 | 18.0971 | 68.51                                | 0.0232  | 0.000    |
|    |            |                                      |         |            |         | max(1)=                              | 8 -> 16 | 0.61322  |

|    |            |         |       |        |       |                                      |         |          |  |                                      |            |          |       |        |       |
|----|------------|---------|-------|--------|-------|--------------------------------------|---------|----------|--|--------------------------------------|------------|----------|-------|--------|-------|
|    |            |         |       |        |       | max(2)=                              | 6 -> 11 | 0.04170  |  | max(4)=                              | 8 -> 21    | 0.01715  |       |        |       |
|    |            |         |       |        |       | max(3)=                              | 8 -> 11 | 0.03744  |  | max(5)=                              | 7 -> 22    | 0.01384  |       |        |       |
|    |            |         |       |        |       | max(4)=                              | 8 -> 12 | 0.03230  |  | min(1)=                              | 7 -> 16    | -0.47757 |       |        |       |
|    |            |         |       |        |       | max(5)=                              | 7 -> 17 | 0.01941  |  | min(2)=                              | 7 -> 12    | -0.03569 |       |        |       |
|    |            |         |       |        |       | min(1)=                              | 7 -> 15 | -0.34197 |  | min(3)=                              | 9 -> 14    | -0.03327 |       |        |       |
|    |            |         |       |        |       | min(2)=                              | 9 -> 19 | -0.03225 |  | min(4)=                              | 6 -> 15    | -0.02372 |       |        |       |
|    |            |         |       |        |       | min(3)=                              | 7 -> 10 | -0.02769 |  | min(5)=                              | 8 -> 13    | -0.01713 |       |        |       |
|    |            |         |       |        |       | min(4)=                              | 6 -> 16 | -0.01199 |  | #states=38 #states>0=15 #states<0=23 |            |          |       |        |       |
|    |            |         |       |        |       | min(5)=                              | 7 -> 21 | -0.01034 |  |                                      |            |          |       |        |       |
|    |            |         |       |        |       | #states=31 #states>0=23 #states<0=8  |         |          |  | 23                                   | Singlet-A1 | 21.2525  | 58.34 | 0.0214 | 0.000 |
|    |            |         |       |        |       |                                      |         |          |  | max(1)=                              | 7 -> 16    | 0.49341  |       |        |       |
| 20 | Singlet-B2 | 19.5598 | 63.39 | 0.0830 | 0.000 | max(2)=                              | 6 -> 10 | 0.47400  |  | max(3)=                              | 8 -> 15    | 0.10782  |       |        |       |
|    |            |         |       |        |       | max(3)=                              | 7 -> 18 | 0.05383  |  | max(4)=                              | 7 -> 22    | 0.04069  |       |        |       |
|    |            |         |       |        |       | max(4)=                              | 7 -> 13 | 0.03794  |  | max(5)=                              | 8 -> 21    | 0.03142  |       |        |       |
|    |            |         |       |        |       | max(5)=                              | 6 -> 12 | 0.03001  |  | min(1)=                              | 9 -> 14    | -0.07346 |       |        |       |
|    |            |         |       |        |       | min(1)=                              | 9 -> 19 | -0.16164 |  | min(2)=                              | 9 -> 20    | -0.05997 |       |        |       |
|    |            |         |       |        |       | min(2)=                              | 6 -> 11 | -0.12849 |  | min(3)=                              | 8 -> 13    | -0.05383 |       |        |       |
|    |            |         |       |        |       | min(3)=                              | 8 -> 11 | -0.05179 |  | min(4)=                              | 7 -> 12    | -0.05275 |       |        |       |
|    |            |         |       |        |       | min(4)=                              | 7 -> 17 | -0.03429 |  | min(5)=                              | 8 -> 18    | -0.04297 |       |        |       |
|    |            |         |       |        |       | min(5)=                              | 7 -> 10 | -0.01490 |  | #states=38 #states>0=19 #states<0=19 |            |          |       |        |       |
|    |            |         |       |        |       | #states=32 #states>0=19 #states<0=13 |         |          |  | 24                                   | Singlet-B1 | 21.8636  | 56.71 | 0.3016 | 0.000 |
|    |            |         |       |        |       |                                      |         |          |  | max(1)=                              | 9 -> 17    | 0.67575  |       |        |       |
| 21 | Singlet-B2 | 20.3042 | 61.06 | 0.0094 | 0.000 | max(2)=                              | 9 -> 18 | 0.19922  |  | max(3)=                              | 9 -> 10    | 0.02422  |       |        |       |
|    |            |         |       |        |       | max(3)=                              | 7 -> 13 | 0.04474  |  | max(4)=                              | 6 -> 14    | 0.01559  |       |        |       |
|    |            |         |       |        |       | max(4)=                              | 6 -> 12 | 0.03842  |  | max(5)=                              | 9 -> 32    | 0.00271  |       |        |       |
|    |            |         |       |        |       | max(5)=                              | 9 -> 19 | 0.03037  |  | min(1)=                              | 8 -> 20    | -0.04252 |       |        |       |
|    |            |         |       |        |       | min(1)=                              | 7 -> 17 | -0.04419 |  | min(2)=                              | 7 -> 19    | -0.02921 |       |        |       |
|    |            |         |       |        |       | min(2)=                              | 6 -> 16 | -0.02137 |  | min(3)=                              | 9 -> 15    | -0.01561 |       |        |       |
|    |            |         |       |        |       | min(3)=                              | 7 -> 10 | -0.01536 |  | min(4)=                              | 8 -> 14    | -0.00465 |       |        |       |
|    |            |         |       |        |       | min(4)=                              | 7 -> 18 | -0.01416 |  | min(5)=                              | 9 -> 30    | -0.00454 |       |        |       |
|    |            |         |       |        |       | min(5)=                              | 9 -> 24 | -0.01097 |  | #states=24 #states>0=12 #states<0=12 |            |          |       |        |       |
|    |            |         |       |        |       | #states=32 #states>0=17 #states<0=15 |         |          |  | 25                                   | Singlet-B1 | 22.2070  | 55.83 | 0.0836 | 0.000 |
|    |            |         |       |        |       |                                      |         |          |  | max(1)=                              | 9 -> 18    | 0.67695  |       |        |       |
| 22 | Singlet-A1 | 20.5496 | 60.33 | 0.0112 | 0.000 | max(2)=                              | 8 -> 20 | 0.03182  |  | max(3)=                              | 7 -> 19    | 0.03053  |       |        |       |
|    |            |         |       |        |       | max(3)=                              | 9 -> 20 | 0.10029  |  | max(4)=                              | 9 -> 15    | 0.02227  |       |        |       |
|    |            |         |       |        |       | max(4)=                              | 8 -> 18 | 0.06266  |  | max(5)=                              | 9 -> 26    | 0.00924  |       |        |       |



|    |            |                                      |         |          |        |       |            |                                      |         |          |        |       |  |
|----|------------|--------------------------------------|---------|----------|--------|-------|------------|--------------------------------------|---------|----------|--------|-------|--|
|    |            | min(1)=                              | 9 -> 17 | -0.19484 |        |       |            | min(3)=                              | 6 -> 17 | -0.01203 |        |       |  |
|    |            | min(2)=                              | 6 -> 14 | -0.03095 |        |       |            | min(4)=                              | 7 -> 11 | -0.01009 |        |       |  |
|    |            | min(3)=                              | 9 -> 21 | -0.01205 |        |       |            | min(5)=                              | 8 -> 29 | -0.00957 |        |       |  |
|    |            | min(4)=                              | 9 -> 10 | -0.00936 |        |       |            | #states=38 #states>0=23 #states<0=15 |         |          |        |       |  |
|    |            | min(5)=                              | 9 -> 29 | -0.00813 |        |       |            |                                      |         |          |        |       |  |
|    |            | #states=23 #states>0=12 #states<0=11 |         |          | 29     |       | Singlet-A1 | 24.7506                              |         | 50.09    | 0.0000 | 0.000 |  |
|    |            |                                      |         |          |        |       |            | max(1)=                              | 9 -> 20 | 0.49323  |        |       |  |
| 26 | Singlet-B2 | 23.7240                              |         | 52.26    | 0.1220 | 0.000 |            | max(2)=                              | 7 -> 16 | 0.03197  |        |       |  |
|    |            | max(1)=                              | 6 -> 12 | 0.66374  |        |       |            | max(3)=                              | 8 -> 29 | 0.00782  |        |       |  |
|    |            | max(2)=                              | 9 -> 19 | 0.23393  |        |       |            | max(4)=                              | 7 -> 12 | 0.00622  |        |       |  |
|    |            | max(3)=                              | 8 -> 16 | 0.01576  |        |       |            | max(5)=                              | 6 -> 18 | 0.00606  |        |       |  |
|    |            | max(4)=                              | 7 -> 10 | 0.01525  |        |       |            | min(1)=                              | 8 -> 18 | -0.47452 |        |       |  |
|    |            | max(5)=                              | 7 -> 15 | 0.00961  |        |       |            | min(2)=                              | 6 -> 13 | -0.17269 |        |       |  |
|    |            | min(1)=                              | 6 -> 11 | -0.05142 |        |       |            | min(3)=                              | 7 -> 11 | -0.01531 |        |       |  |
|    |            | min(2)=                              | 7 -> 17 | -0.03099 |        |       |            | min(4)=                              | 7 -> 22 | -0.01018 |        |       |  |
|    |            | min(3)=                              | 6 -> 16 | -0.01705 |        |       |            | min(5)=                              | 6 -> 15 | -0.01010 |        |       |  |
|    |            | min(4)=                              | 7 -> 13 | -0.00840 |        |       |            | #states=38 #states>0=19 #states<0=19 |         |          |        |       |  |
|    |            | min(5)=                              | 6 -> 23 | -0.00388 |        |       |            |                                      |         |          |        |       |  |
|    |            | #states=30 #states>0=14 #states<0=16 |         |          | 30     |       | Singlet-B1 | 24.9203                              |         | 49.75    | 0.0307 | 0.000 |  |
|    |            |                                      |         |          |        |       |            | max(1)=                              | 6 -> 14 | 0.69740  |        |       |  |
| 27 | Singlet-A1 | 24.1684                              |         | 51.30    | 0.0713 | 0.000 |            | max(2)=                              | 8 -> 20 | 0.08917  |        |       |  |
|    |            | max(1)=                              | 6 -> 13 | 0.66567  |        |       |            | max(3)=                              | 7 -> 19 | 0.04966  |        |       |  |
|    |            | max(2)=                              | 9 -> 20 | 0.21278  |        |       |            | max(4)=                              | 9 -> 15 | 0.02526  |        |       |  |
|    |            | max(3)=                              | 7 -> 16 | 0.02262  |        |       |            | max(5)=                              | 9 -> 18 | 0.01986  |        |       |  |
|    |            | max(4)=                              | 8 -> 15 | 0.00974  |        |       |            | min(1)=                              | 9 -> 21 | -0.04497 |        |       |  |
|    |            | max(5)=                              | 7 -> 11 | 0.00833  |        |       |            | min(2)=                              | 9 -> 17 | -0.01376 |        |       |  |
|    |            | min(1)=                              | 8 -> 17 | -0.09676 |        |       |            | min(3)=                              | 6 -> 25 | -0.00751 |        |       |  |
|    |            | min(2)=                              | 6 -> 10 | -0.02571 |        |       |            | min(4)=                              | 6 -> 20 | -0.00558 |        |       |  |
|    |            | min(3)=                              | 8 -> 18 | -0.01770 |        |       |            | min(5)=                              | 9 -> 10 | -0.00209 |        |       |  |
|    |            | min(4)=                              | 8 -> 13 | -0.01367 |        |       |            | #states=23 #states>0=12 #states<0=11 |         |          |        |       |  |
|    |            | min(5)=                              | 7 -> 12 | -0.01223 |        |       |            |                                      |         |          |        |       |  |
|    |            | #states=37 #states>0=17 #states<0=20 |         |          | 31     |       | Singlet-B2 | 25.4755                              |         | 48.67    | 0.1569 | 0.000 |  |
|    |            |                                      |         |          |        |       |            | max(1)=                              | 9 -> 19 | 0.56675  |        |       |  |
| 28 | Singlet-A1 | 24.5575                              |         | 50.49    | 0.0459 | 0.000 |            | max(2)=                              | 7 -> 18 | 0.34208  |        |       |  |
|    |            | max(1)=                              | 8 -> 17 | 0.69727  |        |       |            | max(3)=                              | 7 -> 15 | 0.08740  |        |       |  |
|    |            | max(2)=                              | 6 -> 13 | 0.09223  |        |       |            | max(4)=                              | 8 -> 16 | 0.07374  |        |       |  |
|    |            | max(3)=                              | 6 -> 15 | 0.04423  |        |       |            | max(5)=                              | 7 -> 17 | 0.02337  |        |       |  |
|    |            | max(4)=                              | 9 -> 20 | 0.03082  |        |       |            | min(1)=                              | 6 -> 12 | -0.20767 |        |       |  |
|    |            | max(5)=                              | 8 -> 13 | 0.02263  |        |       |            | min(2)=                              | 8 -> 11 | -0.04970 |        |       |  |
|    |            | min(1)=                              | 8 -> 18 | -0.01368 |        |       |            | min(3)=                              | 8 -> 22 | -0.04715 |        |       |  |
|    |            | min(2)=                              | 8 -> 21 | -0.01333 |        |       |            | min(4)=                              | 6 -> 11 | -0.02610 |        |       |  |

|    |            |         |       |        |       |            |         |          |       |                                      |
|----|------------|---------|-------|--------|-------|------------|---------|----------|-------|--------------------------------------|
|    |            |         |       |        |       | min(5)=    | 7 -> 21 | -0.02543 |       | #states=38 #states>0=18 #states<0=20 |
|    |            |         |       |        |       |            |         |          |       | #states=32 #states>0=17 #states<0=15 |
|    |            |         |       | 35     |       | Singlet-B1 | 27.9258 |          | 44.40 | 0.1019 0.000                         |
| 32 | Singlet-A2 | 26.7526 | 46.34 | 0.0000 | 0.000 | max(1)=    | 8 -> 20 |          |       | 0.61956                              |
|    |            |         |       |        |       | max(2)=    | 9 -> 21 |          |       | 0.18128                              |
|    |            |         |       |        |       | max(3)=    | 9 -> 17 |          |       | 0.02993                              |
|    |            |         |       |        |       | max(4)=    | 7 -> 24 |          |       | 0.00588                              |
|    |            |         |       |        |       | max(5)=    | 9 -> 30 |          |       | 0.00514                              |
|    |            |         |       |        |       | min(1)=    | 7 -> 19 |          |       | -0.28231                             |
|    |            |         |       |        |       | min(2)=    | 6 -> 14 |          |       | -0.04621                             |
|    |            |         |       |        |       | min(3)=    | 9 -> 15 |          |       | -0.01943                             |
|    |            |         |       |        |       | min(4)=    | 9 -> 13 |          |       | -0.01017                             |
|    |            |         |       |        |       | min(5)=    | 6 -> 20 |          |       | -0.00921                             |
|    |            |         |       |        |       |            |         |          |       | #states=24 #states>0=12 #states<0=12 |
|    |            |         |       |        |       |            |         |          |       | #states=18 #states>0=8 #states<0=10  |
|    |            |         |       | 36     |       | Singlet-B2 | 29.0272 |          | 42.71 | 0.1140 0.000                         |
| 33 | Singlet-B2 | 26.8165 | 46.23 | 0.0452 | 0.000 | max(1)=    | 6 -> 16 |          |       | 0.66893                              |
|    |            |         |       |        |       | max(2)=    | 7 -> 18 |          |       | 0.19743                              |
|    |            |         |       |        |       | max(3)=    | 6 -> 12 |          |       | 0.04546                              |
|    |            |         |       |        |       | max(4)=    | 6 -> 11 |          |       | 0.03486                              |
|    |            |         |       |        |       | max(5)=    | 8 -> 11 |          |       | 0.02117                              |
|    |            |         |       |        |       | min(1)=    | 9 -> 19 |          |       | -0.07958                             |
|    |            |         |       |        |       | min(2)=    | 7 -> 15 |          |       | -0.04690                             |
|    |            |         |       |        |       | min(3)=    | 8 -> 16 |          |       | -0.02622                             |
|    |            |         |       |        |       | min(4)=    | 7 -> 17 |          |       | -0.01932                             |
|    |            |         |       |        |       | min(5)=    | 7 -> 30 |          |       | -0.00900                             |
|    |            |         |       |        |       |            |         |          |       | #states=32 #states>0=16 #states<0=16 |
|    |            |         |       |        |       |            |         |          |       | #states=31 #states>0=16 #states<0=15 |
|    |            |         |       | 37     |       | Singlet-A1 | 29.2152 |          | 42.44 | 1.1948 0.000                         |
| 34 | Singlet-A1 | 27.1740 | 45.63 | 0.0998 | 0.000 | max(1)=    | 8 -> 18 |          |       | 0.48614                              |
|    |            |         |       |        |       | max(2)=    | 9 -> 20 |          |       | 0.41615                              |
|    |            |         |       |        |       | max(3)=    | 6 -> 15 |          |       | 0.17512                              |
|    |            |         |       |        |       | max(4)=    | 7 -> 16 |          |       | 0.11052                              |
|    |            |         |       |        |       | max(5)=    | 8 -> 15 |          |       | 0.07562                              |
|    |            |         |       |        |       | min(1)=    | 6 -> 13 |          |       | -0.12333                             |
|    |            |         |       |        |       | min(2)=    | 7 -> 22 |          |       | -0.11234                             |
|    |            |         |       |        |       | min(3)=    | 8 -> 21 |          |       | -0.10008                             |
|    |            |         |       |        |       | min(4)=    | 7 -> 11 |          |       | -0.07222                             |
|    |            |         |       |        |       | min(5)=    | 8 -> 10 |          |       | -0.02790                             |
|    |            |         |       |        |       |            |         |          |       | #states=38 #states>0=23 #states<0=15 |

### 8.1.3 Main contributions from different excited states at CIS approach

| #_exc.st | ___symm___ | Exc.E        | Osc._Strength | ___f___ | _ $S^{*2}$ _ | min(5)=      | 8 -> 21      | -0.01313     |       |  |
|----------|------------|--------------|---------------|---------|--------------|--------------|--------------|--------------|-------|--|
|          |            |              |               |         |              | #states=36   | #states>0=20 | #states<0=16 |       |  |
| 1        | Singlet-A2 | 6.5858       | 188.26        | 0.0000  | 0.000        |              |              |              |       |  |
|          | max(1)=    | 9 -> 11      | 0.68473       | 4       | Singlet-A2   | 10.6850      | 116.04       | 0.0000       | 0.000 |  |
|          | max(2)=    | 9 -> 16      | 0.15654       |         | max(1)=      | 9 -> 12      | 0.69713      |              |       |  |
|          | max(3)=    | 9 -> 22      | 0.01734       |         | max(2)=      | 9 -> 11      | 0.09295      |              |       |  |
|          | max(4)=    | 7 -> 14      | 0.00533       |         | max(3)=      | 9 -> 22      | 0.03202      |              |       |  |
|          | max(5)=    | 7 -> 20      | 0.00230       |         | max(4)=      | 9 -> 28      | 0.01743      |              |       |  |
|          | min(1)=    | 9 -> 12      | -0.07773      |         | max(5)=      | 9 -> 23      | 0.01093      |              |       |  |
|          | min(2)=    | 9 -> 28      | -0.01399      |         | min(1)=      | 9 -> 16      | -0.06207     |              |       |  |
|          | min(3)=    | 9 -> 23      | -0.00575      |         | min(2)=      | 8 -> 19      | -0.00429     |              |       |  |
|          | min(4)=    | 6 -> 24      | -0.00478      |         | min(3)=      | 6 -> 19      | -0.00422     |              |       |  |
|          | min(5)=    | 6 -> 19      | -0.00109      |         | min(4)=      | 7 -> 20      | -0.00136     |              |       |  |
|          | #states=17 | #states>0=10 | #states<0=7   |         | min(5)=      | 7 -> 27      | -0.00045     |              |       |  |
|          |            |              |               |         | #states=16   | #states>0=10 | #states<0=6  |              |       |  |
| 2        | Singlet-B1 | 7.3651       | 168.34        | 0.0293  | 0.000        |              |              |              |       |  |
|          | max(1)=    | 9 -> 10      | 0.69679       | 5       | Singlet-B2   | 10.8617      | 114.15       | 0.3294       | 0.000 |  |
|          | max(2)=    | 9 -> 13      | 0.05818       |         | max(1)=      | 8 -> 11      | 0.68080      |              |       |  |
|          | max(3)=    | 9 -> 21      | 0.00753       |         | max(2)=      | 7 -> 10      | 0.10204      |              |       |  |
|          | max(4)=    | 9 -> 26      | 0.00566       |         | max(3)=      | 8 -> 16      | 0.09296      |              |       |  |
|          | max(5)=    | 9 -> 29      | 0.00506       |         | max(4)=      | 7 -> 18      | 0.04348      |              |       |  |
|          | min(1)=    | 9 -> 15      | -0.07391      |         | max(5)=      | 6 -> 12      | 0.02506      |              |       |  |
|          | min(2)=    | 9 -> 17      | -0.06890      |         | min(1)=      | 7 -> 15      | -0.07779     |              |       |  |
|          | min(3)=    | 8 -> 20      | -0.01783      |         | min(2)=      | 8 -> 12      | -0.06554     |              |       |  |
|          | min(4)=    | 7 -> 19      | -0.01594      |         | min(3)=      | 9 -> 19      | -0.05814     |              |       |  |
|          | min(5)=    | 8 -> 14      | -0.01013      |         | min(4)=      | 7 -> 13      | -0.02140     |              |       |  |
|          | #states=22 | #states>0=14 | #states<0=8   |         | min(5)=      | 7 -> 21      | -0.01613     |              |       |  |
|          |            |              |               |         | #states=30   | #states>0=15 | #states<0=15 |              |       |  |
| 3        | Singlet-A1 | 10.4995      | 118.09        | 0.3246  | 0.000        |              |              |              |       |  |
|          | max(1)=    | 8 -> 10      | 0.68556       | 6       | Singlet-B1   | 11.1118      | 111.58       | 0.0028       | 0.000 |  |
|          | max(2)=    | 7 -> 11      | 0.05393       |         | max(1)=      | 9 -> 13      | 0.69731      |              |       |  |
|          | max(3)=    | 7 -> 12      | 0.03096       |         | max(2)=      | 9 -> 26      | 0.02083      |              |       |  |
|          | max(4)=    | 7 -> 16      | 0.02463       |         | max(3)=      | 9 -> 29      | 0.01391      |              |       |  |
|          | max(5)=    | 8 -> 18      | 0.00874       |         | max(4)=      | 9 -> 21      | 0.01318      |              |       |  |
|          | min(1)=    | 9 -> 14      | -0.12854      |         | max(5)=      | 7 -> 19      | 0.00973      |              |       |  |
|          | min(2)=    | 8 -> 15      | -0.06941      |         | min(1)=      | 9 -> 15      | -0.08998     |              |       |  |
|          | min(3)=    | 8 -> 17      | -0.05471      |         | min(2)=      | 9 -> 10      | -0.06723     |              |       |  |
|          | min(4)=    | 6 -> 13      | -0.02563      |         | min(3)=      | 9 -> 18      | -0.00870     |              |       |  |

|   |            |                                      |         |          |       |            |                                      |         |              |
|---|------------|--------------------------------------|---------|----------|-------|------------|--------------------------------------|---------|--------------|
|   |            | min(4)=                              | 6 -> 20 | -0.00619 |       |            | #states=34 #states>0=15 #states<0=19 |         |              |
|   |            | min(5)=                              | 6 -> 14 | -0.00349 |       |            |                                      |         |              |
|   |            | #states=21 #states>0=10 #states<0=11 |         |          | 10    | Singlet-B2 | 13.8864                              | 89.28   | 0.0418 0.000 |
|   |            |                                      |         |          |       |            | max(1)=                              | 8 -> 12 | 0.65398      |
| 7 | Singlet-A1 | 12.2558                              | 101.16  | 0.0237   | 0.000 |            | max(2)=                              | 8 -> 11 | 0.10921      |
|   |            | max(1)=                              | 9 -> 14 | 0.62332  |       |            | max(3)=                              | 7 -> 15 | 0.03021      |
|   |            | max(2)=                              | 7 -> 11 | 0.22171  |       |            | max(4)=                              | 8 -> 22 | 0.02657      |
|   |            | max(3)=                              | 8 -> 10 | 0.10470  |       |            | max(5)=                              | 6 -> 11 | 0.02025      |
|   |            | max(4)=                              | 7 -> 16 | 0.04615  |       |            | min(1)=                              | 7 -> 10 | -0.22128     |
|   |            | max(5)=                              | 6 -> 10 | 0.02881  |       |            | min(2)=                              | 8 -> 16 | -0.08366     |
|   |            | min(1)=                              | 8 -> 13 | -0.18241 |       |            | min(3)=                              | 7 -> 13 | -0.03516     |
|   |            | min(2)=                              | 7 -> 12 | -0.11430 |       |            | min(4)=                              | 9 -> 19 | -0.01324     |
|   |            | min(3)=                              | 7 -> 22 | -0.01541 |       |            | min(5)=                              | 6 -> 16 | -0.01071     |
|   |            | min(4)=                              | 8 -> 21 | -0.01539 |       |            | #states=26 #states>0=15 #states<0=11 |         |              |
|   |            | min(5)=                              | 9 -> 20 | -0.01534 |       |            |                                      |         |              |
|   |            | #states=33 #states>0=14 #states<0=19 |         |          | 11    | Singlet-B1 | 14.6024                              | 84.91   | 0.1917 0.000 |
|   |            |                                      |         |          |       |            | max(1)=                              | 8 -> 14 | 0.57188      |
| 8 | Singlet-B2 | 12.8484                              | 96.50   | 0.6319   | 0.000 |            | max(2)=                              | 6 -> 14 | 0.02306      |
|   |            | max(1)=                              | 7 -> 10 | 0.64037  |       |            | max(3)=                              | 8 -> 27 | 0.01721      |
|   |            | max(2)=                              | 8 -> 12 | 0.23951  |       |            | max(4)=                              | 9 -> 18 | 0.01592      |
|   |            | max(3)=                              | 7 -> 13 | 0.13566  |       |            | max(5)=                              | 9 -> 17 | 0.00826      |
|   |            | max(4)=                              | 6 -> 11 | 0.01482  |       |            | min(1)=                              | 9 -> 15 | -0.40764     |
|   |            | max(5)=                              | 9 -> 19 | 0.01473  |       |            | min(2)=                              | 9 -> 13 | -0.05529     |
|   |            | min(1)=                              | 8 -> 11 | -0.07216 |       |            | min(3)=                              | 9 -> 10 | -0.03066     |
|   |            | min(2)=                              | 7 -> 15 | -0.05929 |       |            | min(4)=                              | 8 -> 20 | -0.02703     |
|   |            | min(3)=                              | 6 -> 12 | -0.05095 |       |            | min(5)=                              | 7 -> 19 | -0.01888     |
|   |            | min(4)=                              | 7 -> 17 | -0.04315 |       |            | #states=22 #states>0=11 #states<0=11 |         |              |
|   |            | min(5)=                              | 6 -> 22 | -0.01094 |       |            |                                      |         |              |
|   |            | #states=29 #states>0=15 #states<0=14 |         |          | 12    | Singlet-A1 | 15.0230                              | 82.53   | 0.0624 0.000 |
|   |            |                                      |         |          |       |            | max(1)=                              | 8 -> 13 | 0.55913      |
| 9 | Singlet-A1 | 13.6624                              | 90.75   | 0.4377   | 0.000 |            | max(2)=                              | 9 -> 14 | 0.20483      |
|   |            | max(1)=                              | 7 -> 11 | 0.58606  |       |            | max(3)=                              | 8 -> 15 | 0.11323      |
|   |            | max(2)=                              | 8 -> 13 | 0.33292  |       |            | max(4)=                              | 8 -> 10 | 0.07694      |
|   |            | max(3)=                              | 7 -> 16 | 0.07521  |       |            | max(5)=                              | 9 -> 20 | 0.02621      |
|   |            | max(4)=                              | 6 -> 13 | 0.02747  |       |            | min(1)=                              | 7 -> 11 | -0.27715     |
|   |            | max(5)=                              | 8 -> 26 | 0.01669  |       |            | min(2)=                              | 7 -> 12 | -0.21317     |
|   |            | min(1)=                              | 9 -> 14 | -0.11802 |       |            | min(3)=                              | 7 -> 22 | -0.02652     |
|   |            | min(2)=                              | 8 -> 15 | -0.09211 |       |            | min(4)=                              | 6 -> 17 | -0.02498     |
|   |            | min(3)=                              | 7 -> 12 | -0.08284 |       |            | min(5)=                              | 8 -> 17 | -0.02454     |
|   |            | min(4)=                              | 8 -> 10 | -0.07602 |       |            | #states=36 #states>0=17 #states<0=19 |         |              |
|   |            | min(5)=                              | 9 -> 20 | -0.04588 |       |            |                                      |         |              |

|    |            |            |              |              |       |            |         |          |        |       |
|----|------------|------------|--------------|--------------|-------|------------|---------|----------|--------|-------|
| 13 | Singlet-B1 | 15.0892    | 82.17        | 0.3497       | 0.000 | max(2)=    | 8 -> 11 | 0.03639  |        |       |
|    |            | max(1)=    | 9 -> 15      | 0.55687      |       | max(3)=    | 6 -> 11 | 0.02536  |        |       |
|    |            | max(2)=    | 8 -> 14      | 0.41379      |       | max(4)=    | 7 -> 21 | 0.02406  |        |       |
|    |            | max(3)=    | 9 -> 13      | 0.07593      |       | max(5)=    | 7 -> 18 | 0.01921  |        |       |
|    |            | max(4)=    | 9 -> 10      | 0.06299      |       | min(1)=    | 7 -> 10 | -0.13665 |        |       |
|    |            | max(5)=    | 8 -> 20      | 0.05776      |       | min(2)=    | 9 -> 19 | -0.03357 |        |       |
|    |            | min(1)=    | 6 -> 14      | -0.03077     |       | min(3)=    | 7 -> 15 | -0.02057 |        |       |
|    |            | min(2)=    | 9 -> 18      | -0.02858     |       | min(4)=    | 8 -> 12 | -0.01820 |        |       |
|    |            | min(3)=    | 8 -> 25      | -0.01303     |       | min(5)=    | 8 -> 16 | -0.01751 |        |       |
|    |            | min(4)=    | 9 -> 30      | -0.01140     |       |            |         |          |        |       |
|    |            | min(5)=    | 6 -> 20      | -0.01103     |       |            |         |          |        |       |
|    |            |            |              |              |       |            |         |          |        |       |
|    |            | #states=22 | #states>0=10 | #states<0=12 | 17    | Singlet-A2 | 17.5608 | 70.60    | 0.0000 | 0.000 |
|    |            |            |              |              |       | max(1)=    | 7 -> 14 | 0.70593  |        |       |
| 14 | Singlet-A2 | 16.1920    | 76.57        | 0.0000       | 0.000 | max(2)=    | 7 -> 27 | 0.01561  |        |       |
|    |            | max(1)=    | 9 -> 16      | 0.68481      |       | max(3)=    | 7 -> 20 | 0.01196  |        |       |
|    |            | max(2)=    | 9 -> 12      | 0.07979      |       | max(4)=    | 8 -> 19 | 0.01105  |        |       |
|    |            | max(3)=    | 9 -> 22      | 0.03659      |       | max(5)=    | 6 -> 24 | 0.00488  |        |       |
|    |            | max(4)=    | 7 -> 14      | 0.02087      |       | min(1)=    | 7 -> 25 | -0.02345 |        |       |
|    |            | max(5)=    | 7 -> 20      | 0.00394      |       | min(2)=    | 9 -> 16 | -0.02107 |        |       |
|    |            | min(1)=    | 9 -> 11      | -0.14917     |       | min(3)=    | 6 -> 19 | -0.00897 |        |       |
|    |            | min(2)=    | 9 -> 28      | -0.02258     |       | min(4)=    | 9 -> 12 | -0.00511 |        |       |
|    |            | min(3)=    | 9 -> 23      | -0.00754     |       | min(5)=    | 8 -> 24 | -0.00412 |        |       |
|    |            | min(4)=    | 9 -> 31      | -0.00508     |       |            |         |          |        |       |
|    |            | min(5)=    | 6 -> 24      | -0.00448     |       |            |         |          |        |       |
|    |            |            |              |              |       |            |         |          |        |       |
|    |            | #states=15 | #states>0=9  | #states<0=6  | 18    | Singlet-A1 | 18.4442 | 67.22    | 0.0525 | 0.000 |
|    |            |            |              |              |       | max(1)=    | 8 -> 15 | 0.52475  |        |       |
| 15 | Singlet-A1 | 17.0097    | 72.89        | 0.0006       | 0.000 | max(2)=    | 7 -> 11 | 0.09097  |        |       |
|    |            | max(1)=    | 7 -> 12      | 0.52676      |       | max(3)=    | 8 -> 21 | 0.04737  |        |       |
|    |            | max(2)=    | 8 -> 15      | 0.42837      |       | max(4)=    | 6 -> 17 | 0.04519  |        |       |
|    |            | max(3)=    | 8 -> 13      | 0.12368      |       | max(5)=    | 8 -> 10 | 0.03741  |        |       |
|    |            | max(4)=    | 7 -> 11      | 0.08776      |       | min(1)=    | 7 -> 12 | -0.39045 |        |       |
|    |            | max(5)=    | 9 -> 14      | 0.08552      |       | min(2)=    | 9 -> 14 | -0.15935 |        |       |
|    |            | min(1)=    | 8 -> 18      | -0.04567     |       | min(3)=    | 8 -> 13 | -0.15024 |        |       |
|    |            | min(2)=    | 9 -> 20      | -0.04442     |       | min(4)=    | 7 -> 16 | -0.07807 |        |       |
|    |            | min(3)=    | 8 -> 17      | -0.03462     |       | min(5)=    | 8 -> 18 | -0.03334 |        |       |
|    |            | min(4)=    | 6 -> 15      | -0.02922     |       |            |         |          |        |       |
|    |            | min(5)=    | 6 -> 17      | -0.01887     |       |            |         |          |        |       |
|    |            |            |              |              |       |            |         |          |        |       |
|    |            | #states=36 | #states>0=22 | #states<0=14 | 19    | Singlet-B2 | 19.4648 | 63.70    | 0.0170 | 0.000 |
|    |            |            |              |              |       | max(1)=    | 8 -> 16 | 0.61072  |        |       |
| 16 | Singlet-B2 | 17.1768    | 72.18        | 0.0381       | 0.000 | max(2)=    | 8 -> 12 | 0.08582  |        |       |
|    |            | max(1)=    | 7 -> 13      | 0.68943      |       | max(3)=    | 7 -> 18 | 0.04182  |        |       |

|    |            |                                      |         |          |       |  |            |                                      |         |          |       |  |  |  |  |  |  |  |  |
|----|------------|--------------------------------------|---------|----------|-------|--|------------|--------------------------------------|---------|----------|-------|--|--|--|--|--|--|--|--|
|    |            | max(4)=                              | 7 -> 17 | 0.02978  |       |  |            | min(1)=                              | 8 -> 20 | -0.03162 |       |  |  |  |  |  |  |  |  |
|    |            | max(5)=                              | 8 -> 22 | 0.02737  |       |  |            | min(2)=                              | 7 -> 19 | -0.02276 |       |  |  |  |  |  |  |  |  |
|    |            | min(1)=                              | 7 -> 15 | -0.31294 |       |  |            | min(3)=                              | 8 -> 14 | -0.01301 |       |  |  |  |  |  |  |  |  |
|    |            | min(2)=                              | 8 -> 11 | -0.10696 |       |  |            | min(4)=                              | 9 -> 30 | -0.01280 |       |  |  |  |  |  |  |  |  |
|    |            | min(3)=                              | 7 -> 10 | -0.06738 |       |  |            | min(5)=                              | 9 -> 21 | -0.01019 |       |  |  |  |  |  |  |  |  |
|    |            | min(4)=                              | 9 -> 19 | -0.03711 |       |  |            | #states=23 #states>0=13 #states<0=10 |         |          |       |  |  |  |  |  |  |  |  |
|    |            | min(5)=                              | 7 -> 21 | -0.01860 |       |  |            |                                      |         |          |       |  |  |  |  |  |  |  |  |
|    |            | #states=29 #states>0=17 #states<0=12 |         |          | 23    |  | Singlet-B2 | 23.2098                              | 53.42   | 0.0020   | 0.000 |  |  |  |  |  |  |  |  |
|    |            |                                      |         |          |       |  |            | max(1)=                              | 6 -> 11 | 0.67826  |       |  |  |  |  |  |  |  |  |
| 20 | Singlet-B2 | 20.6228                              | 60.12   | 0.1434   | 0.000 |  |            | max(2)=                              | 6 -> 16 | 0.13457  |       |  |  |  |  |  |  |  |  |
|    |            | max(1)=                              | 7 -> 15 | 0.60606  |       |  |            | max(3)=                              | 7 -> 15 | 0.04326  |       |  |  |  |  |  |  |  |  |
|    |            | max(2)=                              | 8 -> 16 | 0.30223  |       |  |            | max(4)=                              | 7 -> 17 | 0.01610  |       |  |  |  |  |  |  |  |  |
|    |            | max(3)=                              | 7 -> 10 | 0.04738  |       |  |            | max(5)=                              | 8 -> 16 | 0.01539  |       |  |  |  |  |  |  |  |  |
|    |            | max(4)=                              | 7 -> 18 | 0.03086  |       |  |            | min(1)=                              | 9 -> 19 | -0.10357 |       |  |  |  |  |  |  |  |  |
|    |            | max(5)=                              | 7 -> 13 | 0.02800  |       |  |            | min(2)=                              | 6 -> 12 | -0.08538 |       |  |  |  |  |  |  |  |  |
|    |            | min(1)=                              | 9 -> 19 | -0.17337 |       |  |            | min(3)=                              | 7 -> 13 | -0.02411 |       |  |  |  |  |  |  |  |  |
|    |            | min(2)=                              | 6 -> 11 | -0.06650 |       |  |            | min(4)=                              | 8 -> 12 | -0.02148 |       |  |  |  |  |  |  |  |  |
|    |            | min(3)=                              | 7 -> 17 | -0.02562 |       |  |            | min(5)=                              | 6 -> 28 | -0.00878 |       |  |  |  |  |  |  |  |  |
|    |            | min(4)=                              | 6 -> 16 | -0.01600 |       |  |            | #states=31 #states>0=14 #states<0=17 |         |          |       |  |  |  |  |  |  |  |  |
|    |            | min(5)=                              | 7 -> 26 | -0.01249 |       |  |            |                                      |         |          |       |  |  |  |  |  |  |  |  |
|    |            | #states=31 #states>0=19 #states<0=12 |         |          | 24    |  | Singlet-B1 | 23.2490                              | 53.33   | 0.0912   | 0.000 |  |  |  |  |  |  |  |  |
|    |            |                                      |         |          |       |  |            | max(1)=                              | 9 -> 18 | 0.67944  |       |  |  |  |  |  |  |  |  |
| 21 | Singlet-A1 | 22.4841                              | 55.14   | 0.0044   | 0.000 |  |            | max(2)=                              | 8 -> 20 | 0.04431  |       |  |  |  |  |  |  |  |  |
|    |            | max(1)=                              | 7 -> 16 | 0.66850  |       |  |            | max(3)=                              | 7 -> 19 | 0.03545  |       |  |  |  |  |  |  |  |  |
|    |            | max(2)=                              | 8 -> 15 | 0.05812  |       |  |            | max(4)=                              | 9 -> 15 | 0.02539  |       |  |  |  |  |  |  |  |  |
|    |            | max(3)=                              | 8 -> 17 | 0.03117  |       |  |            | max(5)=                              | 9 -> 26 | 0.02399  |       |  |  |  |  |  |  |  |  |
|    |            | max(4)=                              | 7 -> 22 | 0.02442  |       |  |            | min(1)=                              | 9 -> 17 | -0.17843 |       |  |  |  |  |  |  |  |  |
|    |            | max(5)=                              | 6 -> 21 | 0.01377  |       |  |            | min(2)=                              | 6 -> 14 | -0.03089 |       |  |  |  |  |  |  |  |  |
|    |            | min(1)=                              | 9 -> 20 | -0.14210 |       |  |            | min(3)=                              | 9 -> 29 | -0.02282 |       |  |  |  |  |  |  |  |  |
|    |            | min(2)=                              | 6 -> 10 | -0.10299 |       |  |            | min(4)=                              | 9 -> 10 | -0.01832 |       |  |  |  |  |  |  |  |  |
|    |            | min(3)=                              | 7 -> 11 | -0.07685 |       |  |            | min(5)=                              | 9 -> 21 | -0.00711 |       |  |  |  |  |  |  |  |  |
|    |            | min(4)=                              | 8 -> 18 | -0.06477 |       |  |            | #states=22 #states>0=12 #states<0=10 |         |          |       |  |  |  |  |  |  |  |  |
|    |            | min(5)=                              | 6 -> 13 | -0.04927 |       |  |            |                                      |         |          |       |  |  |  |  |  |  |  |  |
|    |            | #states=36 #states>0=17 #states<0=19 |         |          | 25    |  | Singlet-A1 | 23.9737                              | 51.72   | 0.0267   | 0.000 |  |  |  |  |  |  |  |  |
|    |            |                                      |         |          |       |  |            | max(1)=                              | 6 -> 10 | 0.68376  |       |  |  |  |  |  |  |  |  |
| 22 | Singlet-B1 | 22.9087                              | 54.12   | 0.2891   | 0.000 |  |            | max(2)=                              | 7 -> 16 | 0.10727  |       |  |  |  |  |  |  |  |  |
|    |            | max(1)=                              | 9 -> 17 | 0.67671  |       |  |            | max(3)=                              | 6 -> 13 | 0.04879  |       |  |  |  |  |  |  |  |  |
|    |            | max(2)=                              | 9 -> 18 | 0.18405  |       |  |            | max(4)=                              | 8 -> 15 | 0.03537  |       |  |  |  |  |  |  |  |  |
|    |            | max(3)=                              | 9 -> 10 | 0.06453  |       |  |            | max(5)=                              | 9 -> 20 | 0.03218  |       |  |  |  |  |  |  |  |  |
|    |            | max(4)=                              | 6 -> 14 | 0.04007  |       |  |            | min(1)=                              | 6 -> 15 | -0.10323 |       |  |  |  |  |  |  |  |  |
|    |            | max(5)=                              | 6 -> 27 | 0.01071  |       |  |            | min(2)=                              | 9 -> 14 | -0.04660 |       |  |  |  |  |  |  |  |  |

|    |            |            |              |              |       |  |            |              |              |        |       |
|----|------------|------------|--------------|--------------|-------|--|------------|--------------|--------------|--------|-------|
|    |            | min(3)=    | 6 -> 17      | -0.02330     |       |  | min(5)=    | 7 -> 29      | -0.00514     |        |       |
|    |            | min(4)=    | 9 -> 25      | -0.02039     |       |  | #states=30 | #states>0=20 | #states<0=10 |        |       |
|    |            | min(5)=    | 8 -> 13      | -0.01979     |       |  |            |              |              |        |       |
|    |            | #states=38 | #states>0=22 | #states<0=16 | 29    |  | Singlet-B2 | 27.3836      | 45.28        | 0.0244 | 0.000 |
|    |            |            |              |              |       |  | max(1)=    | 6 -> 12      | 0.60364      |        |       |
| 26 | Singlet-A1 | 25.7829    | 48.09        | 0.0246       | 0.000 |  | max(2)=    | 6 -> 11      | 0.04340      |        |       |
|    |            | max(1)=    | 9 -> 20      | 0.53598      |       |  | max(3)=    | 7 -> 10      | 0.04293      |        |       |
|    |            | max(2)=    | 8 -> 17      | 0.06690      |       |  | max(4)=    | 8 -> 22      | 0.02612      |        |       |
|    |            | max(3)=    | 7 -> 16      | 0.06441      |       |  | max(5)=    | 6 -> 23      | 0.01654      |        |       |
|    |            | max(4)=    | 6 -> 13      | 0.03817      |       |  | min(1)=    | 9 -> 19      | -0.25686     |        |       |
|    |            | max(5)=    | 8 -> 29      | 0.01684      |       |  | min(2)=    | 7 -> 18      | -0.24109     |        |       |
|    |            | min(1)=    | 8 -> 18      | -0.44563     |       |  | min(3)=    | 7 -> 15      | -0.05294     |        |       |
|    |            | min(2)=    | 6 -> 10      | -0.04562     |       |  | min(4)=    | 8 -> 11      | -0.03880     |        |       |
|    |            | min(3)=    | 9 -> 25      | -0.02035     |       |  | min(5)=    | 7 -> 17      | -0.02469     |        |       |
|    |            | min(4)=    | 8 -> 26      | -0.01530     |       |  | #states=30 | #states>0=16 | #states<0=14 |        |       |
|    |            | min(5)=    | 6 -> 15      | -0.01423     |       |  |            |              |              |        |       |
|    |            | #states=32 | #states>0=18 | #states<0=14 | 30    |  | Singlet-A1 | 27.4499      | 45.17        | 0.0862 | 0.000 |
|    |            |            |              |              |       |  | max(1)=    | 6 -> 13      | 0.68473      |        |       |
| 27 | Singlet-A1 | 25.9826    | 47.72        | 0.0525       | 0.000 |  | max(2)=    | 8 -> 18      | 0.12654      |        |       |
|    |            | max(1)=    | 8 -> 17      | 0.69735      |       |  | max(3)=    | 7 -> 16      | 0.06091      |        |       |
|    |            | max(2)=    | 8 -> 10      | 0.06052      |       |  | max(4)=    | 9 -> 20      | 0.04956      |        |       |
|    |            | max(3)=    | 8 -> 18      | 0.05459      |       |  | max(5)=    | 6 -> 15      | 0.03752      |        |       |
|    |            | max(4)=    | 6 -> 13      | 0.03048      |       |  | min(1)=    | 6 -> 10      | -0.05575     |        |       |
|    |            | max(5)=    | 8 -> 15      | 0.02624      |       |  | min(2)=    | 8 -> 17      | -0.03697     |        |       |
|    |            | min(1)=    | 9 -> 20      | -0.04304     |       |  | min(3)=    | 7 -> 11      | -0.01656     |        |       |
|    |            | min(2)=    | 7 -> 16      | -0.03203     |       |  | min(4)=    | 8 -> 13      | -0.01134     |        |       |
|    |            | min(3)=    | 7 -> 22      | -0.01743     |       |  | min(5)=    | 9 -> 14      | -0.00505     |        |       |
|    |            | min(4)=    | 6 -> 15      | -0.01633     |       |  | #states=33 | #states>0=19 | #states<0=14 |        |       |
|    |            | min(5)=    | 8 -> 21      | -0.01496     |       |  |            |              |              |        |       |
|    |            | #states=36 | #states>0=21 | #states<0=15 | 31    |  | Singlet-A2 | 27.8593      | 44.50        | 0.0000 | 0.000 |
|    |            |            |              |              |       |  | max(1)=    | 8 -> 19      | 0.70440      |        |       |
| 28 | Singlet-B2 | 26.2831    | 47.17        | 0.4513       | 0.000 |  | max(2)=    | 7 -> 20      | 0.04287      |        |       |
|    |            | max(1)=    | 9 -> 19      | 0.54843      |       |  | max(3)=    | 7 -> 25      | 0.00611      |        |       |
|    |            | max(2)=    | 6 -> 12      | 0.32973      |       |  | max(4)=    | 9 -> 12      | 0.00475      |        |       |
|    |            | max(3)=    | 7 -> 18      | 0.22509      |       |  | max(5)=    | 7 -> 27      | 0.00348      |        |       |
|    |            | max(4)=    | 6 -> 11      | 0.12144      |       |  | min(1)=    | 8 -> 24      | -0.03651     |        |       |
|    |            | max(5)=    | 7 -> 15      | 0.11253      |       |  | min(2)=    | 6 -> 24      | -0.01568     |        |       |
|    |            | min(1)=    | 8 -> 22      | -0.04148     |       |  | min(3)=    | 9 -> 22      | -0.01320     |        |       |
|    |            | min(2)=    | 9 -> 24      | -0.02500     |       |  | min(4)=    | 7 -> 14      | -0.01187     |        |       |
|    |            | min(3)=    | 7 -> 21      | -0.02163     |       |  | min(5)=    | 9 -> 16      | -0.00359     |        |       |
|    |            | min(4)=    | 6 -> 16      | -0.01091     |       |  | #states=17 | #states>0=9  | #states<0=8  |        |       |

|    |                                      |         |       |          |                   |                                      |         |       |          |       |
|----|--------------------------------------|---------|-------|----------|-------------------|--------------------------------------|---------|-------|----------|-------|
| 32 | Singlet-B1                           | 28.0712 | 44.17 | 0.0259   | <del>35.000</del> | Singlet-A1                           | 29.9642 | 41.38 | 0.4855   | 0.000 |
|    | max(1)=                              | 6 -> 14 |       | 0.68642  |                   | max(1)=                              | 6 -> 15 |       | 0.58105  |       |
|    | max(2)=                              | 8 -> 20 |       | 0.15865  |                   | max(2)=                              | 6 -> 10 |       | 0.09990  |       |
|    | max(3)=                              | 9 -> 15 |       | 0.02140  |                   | max(3)=                              | 7 -> 22 |       | 0.06465  |       |
|    | max(4)=                              | 7 -> 19 |       | 0.02128  |                   | max(4)=                              | 6 -> 13 |       | 0.05422  |       |
|    | max(5)=                              | 9 -> 21 |       | 0.01638  |                   | max(5)=                              | 8 -> 21 |       | 0.04070  |       |
|    | min(1)=                              | 9 -> 17 |       | -0.03629 |                   | min(1)=                              | 8 -> 18 |       | -0.29450 |       |
|    | min(2)=                              | 6 -> 25 |       | -0.02477 |                   | min(2)=                              | 9 -> 20 |       | -0.21756 |       |
|    | min(3)=                              | 9 -> 29 |       | -0.00325 |                   | min(3)=                              | 7 -> 16 |       | -0.05893 |       |
|    | min(4)=                              | 9 -> 32 |       | -0.00303 |                   | min(4)=                              | 6 -> 17 |       | -0.03765 |       |
|    | min(5)=                              | 8 -> 14 |       | -0.00287 |                   | min(5)=                              | 8 -> 15 |       | -0.03296 |       |
|    | #states=23 #states>0=13 #states<0=10 |         |       |          |                   | #states=34 #states>0=14 #states<0=20 |         |       |          |       |
| 33 | Singlet-B2                           | 28.5619 | 43.41 | 0.0609   | <del>36.000</del> | Singlet-A1                           | 30.9514 | 40.06 | 1.3451   | 0.000 |
|    | max(1)=                              | 7 -> 17 |       | 0.69996  |                   | max(1)=                              | 8 -> 18 |       | 0.41756  |       |
|    | max(2)=                              | 7 -> 10 |       | 0.05014  |                   | max(2)=                              | 6 -> 15 |       | 0.38131  |       |
|    | max(3)=                              | 7 -> 15 |       | 0.02719  |                   | max(3)=                              | 9 -> 20 |       | 0.35079  |       |
|    | max(4)=                              | 6 -> 22 |       | 0.02123  |                   | max(4)=                              | 7 -> 16 |       | 0.11347  |       |
|    | max(5)=                              | 7 -> 13 |       | 0.01600  |                   | max(5)=                              | 8 -> 15 |       | 0.06554  |       |
|    | min(1)=                              | 6 -> 16 |       | -0.04718 |                   | min(1)=                              | 6 -> 13 |       | -0.13218 |       |
|    | min(2)=                              | 7 -> 18 |       | -0.04293 |                   | min(2)=                              | 8 -> 21 |       | -0.08333 |       |
|    | min(3)=                              | 7 -> 21 |       | -0.02361 |                   | min(3)=                              | 7 -> 22 |       | -0.07424 |       |
|    | min(4)=                              | 7 -> 26 |       | -0.01829 |                   | min(4)=                              | 8 -> 10 |       | -0.02169 |       |
|    | min(5)=                              | 7 -> 30 |       | -0.01100 |                   | min(5)=                              | 9 -> 25 |       | -0.01317 |       |
|    | #states=32 #states>0=13 #states<0=19 |         |       |          |                   | #states=37 #states>0=22 #states<0=15 |         |       |          |       |
| 34 | Singlet-B1                           | 29.4276 | 42.13 | 0.1699   | <del>37.000</del> | Singlet-B2                           | 31.3201 | 39.59 | 1.2738   | 0.000 |
|    | max(1)=                              | 8 -> 20 |       | 0.61419  |                   | max(1)=                              | 7 -> 18 |       | 0.60533  |       |
|    | max(2)=                              | 9 -> 21 |       | 0.18257  |                   | max(2)=                              | 8 -> 22 |       | 0.13722  |       |
|    | max(3)=                              | 9 -> 17 |       | 0.03571  |                   | max(3)=                              | 6 -> 12 |       | 0.10996  |       |
|    | max(4)=                              | 6 -> 20 |       | 0.01659  |                   | max(4)=                              | 7 -> 21 |       | 0.10270  |       |
|    | max(5)=                              | 7 -> 24 |       | 0.01149  |                   | max(5)=                              | 7 -> 17 |       | 0.03935  |       |
|    | min(1)=                              | 7 -> 19 |       | -0.25679 |                   | min(1)=                              | 9 -> 19 |       | -0.26592 |       |
|    | min(2)=                              | 6 -> 14 |       | -0.13514 |                   | min(2)=                              | 8 -> 16 |       | -0.10003 |       |
|    | min(3)=                              | 9 -> 15 |       | -0.04316 |                   | min(3)=                              | 8 -> 11 |       | -0.06017 |       |
|    | min(4)=                              | 8 -> 25 |       | -0.02617 |                   | min(4)=                              | 7 -> 15 |       | -0.05849 |       |
|    | min(5)=                              | 9 -> 18 |       | -0.01927 |                   | min(5)=                              | 7 -> 13 |       | -0.03313 |       |
|    | #states=22 #states>0=9 #states<0=13  |         |       |          |                   | #states=32 #states>0=15 #states<0=17 |         |       |          |       |



## 8.2 6-311++G(d,p)

### 8.2.1 Plots

Figure S12: For  $\text{H}_2\text{S}$  molecule and 6-311++G(d,p) basis set, variation of  $\alpha_{ZZ}$  (top) and  $\beta_{ZZZ}$  (bottom) with respect to the number of orbitals (FIOs decomposition presented in this work, in Plots S12a and S12c) or states (SOS approaches, in Plots S12b and S12d). For  $\alpha$  FIOs, three approaches were considered: CPKS (CAM-B3LYP), CPHF and UPHF. For  $\beta$  FIOs, the results of CPKS and CPHF approaches are provided. All elements of the  $\beta$  tensor were recomputed with an error less than 0.02 au in the case of the FIOs. For SOS approach, TDDFT (CAM-B3LYP) and CIS methods were employed. Recomputed values of  $\alpha_{ZZ}$  and  $\beta_{ZZZ}$  for the different approaches are included in each plot. HOMO (H) and LUMO (L) are represented by blue and pink dotted lines, respectively.

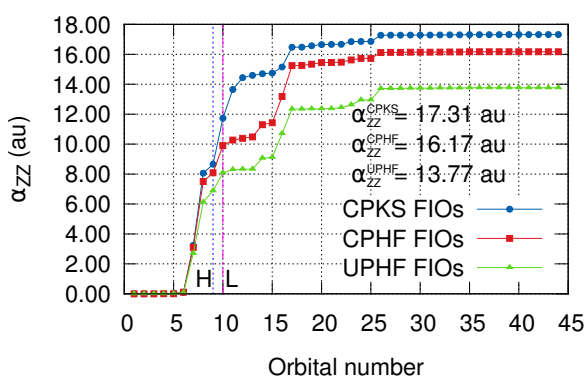

(a) CPKS-, CPHF- and UPHF-FIOs decomposition of  $\alpha_{ZZ}$  into MOs.

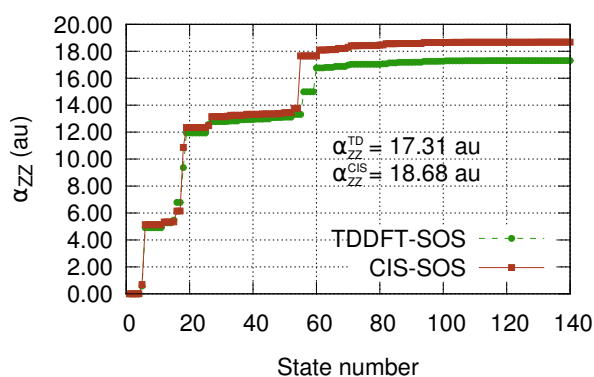

(b) TDDFT- and CIS-SOS decomposition of  $\alpha_{ZZ}$  into states.

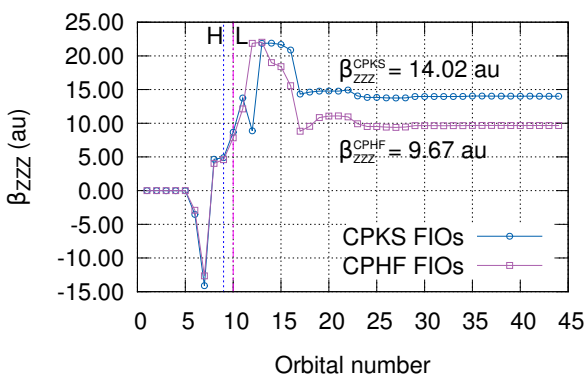

(c) CPKS- and CPHF-FIOs decomposition of  $\beta_{ZZZ}$  into MOs.

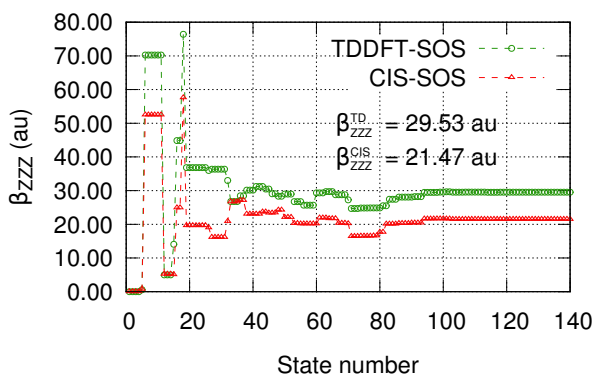

(d) TDDFT- and CIS-SOS decomposition of  $\beta_{ZZZ}$  into states.

### 8.2.2 Main contributions from different excited states at TDDFT (CAM-B3LYP) approach

| #_exc.st | __symm__   | Exc.E                       | Osc._Strength | __f__    | _ <del>S</del> *2>_ | Singlet-B1 | 7.9539  | 155.88  | 0.0256   | 0.000 |
|----------|------------|-----------------------------|---------------|----------|---------------------|------------|---------|---------|----------|-------|
| 1        | Singlet-B1 | 5.8982                      | 210.21        | 0.0486   | 0.000               |            |         |         |          |       |
|          |            | max(1)=                     | 9 -> 10       | 0.68903  |                     |            | max(1)= | 9 -> 13 | 0.70336  |       |
|          |            | max(2)=                     | 9 -> 19       | 0.01598  |                     |            | max(2)= | 9 -> 19 | 0.06468  |       |
|          |            | max(3)=                     | 9 -> 27       | 0.00650  |                     |            | max(3)= | 9 -> 15 | 0.01784  |       |
|          |            | max(4)=                     | 6 -> 26       | 0.00364  |                     |            | max(4)= | 8 -> 14 | 0.01081  |       |
|          |            | max(5)=                     | 6 -> 20       | 0.00262  |                     |            | max(5)= | 9 -> 10 | 0.00506  |       |
|          |            | min(1)=                     | 9 -> 17       | -0.15758 |                     |            | min(1)= | 9 -> 17 | -0.02254 |       |
|          |            | min(2)=                     | 9 -> 24       | -0.01260 |                     |            | min(2)= | 9 -> 21 | -0.01111 |       |
|          |            | min(3)=                     | 9 -> 13       | -0.01112 |                     |            | min(3)= | 8 -> 33 | -0.00125 |       |
|          |            | min(4)=                     | 9 -> 15       | -0.00952 |                     |            | min(4)= | 7 -> 30 | -0.00120 |       |
|          |            | min(5)=                     | 7 -> 25       | -0.00731 |                     |            | min(5)= | 8 -> 20 | -0.00110 |       |
|          |            | #CIs=30 #CIs>0=16 #CIs<0=13 |               |          | 5                   | Singlet-A1 | 8.2969  | 149.44  | 0.0178   | 0.000 |
|          |            |                             |               |          |                     |            | max(1)= | 9 -> 14 | 0.68625  |       |
| 2        | Singlet-A2 | 6.0526                      | 204.84        | 0.0000   | 0.000               |            |         |         |          |       |
|          |            | max(1)=                     | 9 -> 11       | 0.57869  |                     |            | max(1)= | 8 -> 17 | 0.03457  |       |
|          |            | max(2)=                     | 9 -> 22       | 0.03410  |                     |            | max(2)= | 8 -> 17 | 0.03457  |       |
|          |            | max(3)=                     | 6 -> 25       | 0.00671  |                     |            | max(3)= | 9 -> 20 | 0.02136  |       |
|          |            | max(4)=                     | 8 -> 25       | 0.00469  |                     |            | max(4)= | 7 -> 16 | 0.01664  |       |
|          |            | max(5)=                     | 9 -> 34       | 0.00412  |                     |            | max(5)= | 8 -> 15 | 0.01396  |       |
|          |            | min(1)=                     | 9 -> 12       | -0.35211 |                     |            | min(1)= | 8 -> 10 | -0.15111 |       |
|          |            | min(2)=                     | 9 -> 16       | -0.20026 |                     |            | min(2)= | 8 -> 13 | -0.03731 |       |
|          |            | min(3)=                     | 9 -> 28       | -0.00594 |                     |            | min(3)= | 7 -> 11 | -0.03663 |       |
|          |            | min(4)=                     | 7 -> 14       | -0.00450 |                     |            | min(4)= | 8 -> 19 | -0.02913 |       |
|          |            | min(5)=                     | 7 -> 20       | -0.00368 |                     |            | min(5)= | 7 -> 18 | -0.02161 |       |
|          |            | #CIs=21 #CIs>0=7 #CIs<0=13  |               |          | 6                   | Singlet-A1 | 8.8803  | 139.62  | 0.1538   | 0.000 |
|          |            |                             |               |          |                     |            | max(1)= | 8 -> 10 | 0.67052  |       |
| 3        | Singlet-A2 | 7.6518                      | 162.03        | 0.0000   | 0.000               |            |         |         |          |       |
|          |            | max(1)=                     | 9 -> 12       | 0.60616  |                     |            | max(1)= | 9 -> 14 | 0.14764  |       |
|          |            | max(2)=                     | 9 -> 11       | 0.35473  |                     |            | max(2)= | 9 -> 14 | 0.14764  |       |
|          |            | max(3)=                     | 9 -> 18       | 0.07047  |                     |            | max(3)= | 7 -> 12 | 0.04488  |       |
|          |            | max(4)=                     | 7 -> 14       | 0.00394  |                     |            | max(4)= | 7 -> 16 | 0.03557  |       |
|          |            | max(5)=                     | 9 -> 28       | 0.00377  |                     |            | max(5)= | 8 -> 23 | 0.00473  |       |
|          |            | min(1)=                     | 9 -> 16       | -0.04178 |                     |            | min(1)= | 8 -> 17 | -0.13181 |       |
|          |            | min(2)=                     | 8 -> 25       | -0.00083 |                     |            | min(2)= | 8 -> 13 | -0.06874 |       |
|          |            | min(3)=                     | 7 -> 26       | -0.00060 |                     |            | min(3)= | 7 -> 11 | -0.05081 |       |
|          |            | min(4)=                     | 7 -> 20       | -0.00059 |                     |            | min(4)= | 8 -> 15 | -0.01756 |       |
|          |            | min(5)=                     | 9 -> 29       | -0.00059 |                     |            | min(5)= | 6 -> 13 | -0.01121 |       |
|          |            | #CIs=21 #CIs>0=8 #CIs<0=12  |               |          | 7                   | Singlet-B1 | 9.2056  | 134.68  | 0.2307   | 0.000 |
|          |            |                             |               |          |                     |            | max(1)= | 9 -> 15 | 0.52238  |       |

|    |            |                             |         |          |       |            |         |                             |         |          |  |  |
|----|------------|-----------------------------|---------|----------|-------|------------|---------|-----------------------------|---------|----------|--|--|
|    |            | max(2)=                     | 8 -> 14 | 0.04840  |       |            |         | max(4)=                     | 7 -> 21 | 0.03816  |  |  |
|    |            | max(3)=                     | 6 -> 14 | 0.02020  |       |            |         | max(5)=                     | 8 -> 18 | 0.02081  |  |  |
|    |            | max(4)=                     | 9 -> 27 | 0.01406  |       |            |         | min(1)=                     | 8 -> 12 | -0.22991 |  |  |
|    |            | max(5)=                     | 9 -> 19 | 0.01366  |       |            |         | min(2)=                     | 8 -> 16 | -0.11479 |  |  |
|    |            | min(1)=                     | 9 -> 17 | -0.46048 |       |            |         | min(3)=                     | 7 -> 10 | -0.10629 |  |  |
|    |            | min(2)=                     | 9 -> 10 | -0.09871 |       |            |         | min(4)=                     | 7 -> 15 | -0.05686 |  |  |
|    |            | min(3)=                     | 9 -> 13 | -0.02946 |       |            |         | min(5)=                     | 7 -> 23 | -0.02450 |  |  |
|    |            | min(4)=                     | 9 -> 24 | -0.02694 |       |            |         | #CIs=40 #CIs>0=13 #CIs<0=26 |         |          |  |  |
|    |            | min(5)=                     | 7 -> 25 | -0.02588 |       |            |         |                             |         |          |  |  |
|    |            | #CIs=30 #CIs>0=18 #CIs<0=11 |         |          | 11    | Singlet-B2 | 10.5179 | 117.88                      | 0.0059  | 0.000    |  |  |
| 8  | Singlet-A2 | 9.6474                      | 128.52  | 0.0000   | 0.000 |            |         | max(1)=                     | 8 -> 12 | 0.60674  |  |  |
|    |            | max(1)=                     | 9 -> 16 | 0.67365  |       |            |         | max(2)=                     | 8 -> 11 | 0.25824  |  |  |
|    |            | max(2)=                     | 9 -> 11 | 0.19582  |       |            |         | max(3)=                     | 7 -> 10 | 0.23335  |  |  |
|    |            | max(3)=                     | 7 -> 14 | 0.00404  |       |            |         | max(4)=                     | 8 -> 18 | 0.06229  |  |  |
|    |            | max(4)=                     | 9 -> 28 | 0.00257  |       |            |         | max(5)=                     | 7 -> 15 | 0.01864  |  |  |
|    |            | max(5)=                     | 7 -> 20 | 0.00191  |       |            |         | min(1)=                     | 7 -> 17 | -0.06214 |  |  |
|    |            | min(1)=                     | 9 -> 12 | -0.06665 |       |            |         | min(2)=                     | 8 -> 16 | -0.04493 |  |  |
|    |            | min(2)=                     | 9 -> 22 | -0.05697 |       |            |         | min(3)=                     | 9 -> 25 | -0.01410 |  |  |
|    |            | min(3)=                     | 9 -> 18 | -0.01235 |       |            |         | min(4)=                     | 7 -> 21 | -0.00973 |  |  |
|    |            | min(4)=                     | 6 -> 25 | -0.00306 |       |            |         | min(5)=                     | 6 -> 11 | -0.00838 |  |  |
|    |            | min(5)=                     | 8 -> 25 | -0.00197 |       |            |         | #CIs=40 #CIs>0=26 #CIs<0=13 |         |          |  |  |
|    |            | #CIs=21 #CIs>0=12 #CIs<0=9  |         |          | 12    | Singlet-A1 | 10.9492 | 113.24                      | 0.0197  | 0.000    |  |  |
| 9  | Singlet-B1 | 9.7084                      | 127.71  | 0.1949   | 0.000 |            |         | max(1)=                     | 8 -> 13 | 0.69040  |  |  |
|    |            | max(1)=                     | 9 -> 17 | 0.50990  |       |            |         | max(2)=                     | 7 -> 16 | 0.04826  |  |  |
|    |            | max(2)=                     | 9 -> 15 | 0.47159  |       |            |         | max(3)=                     | 8 -> 10 | 0.04678  |  |  |
|    |            | max(3)=                     | 9 -> 10 | 0.12419  |       |            |         | max(4)=                     | 9 -> 14 | 0.04365  |  |  |
|    |            | max(4)=                     | 8 -> 14 | 0.03115  |       |            |         | max(5)=                     | 8 -> 19 | 0.03299  |  |  |
|    |            | max(5)=                     | 9 -> 24 | 0.01831  |       |            |         | min(1)=                     | 7 -> 11 | -0.11307 |  |  |
|    |            | min(1)=                     | 9 -> 19 | -0.02227 |       |            |         | min(2)=                     | 9 -> 20 | -0.04585 |  |  |
|    |            | min(2)=                     | 8 -> 26 | -0.00575 |       |            |         | min(3)=                     | 7 -> 18 | -0.02607 |  |  |
|    |            | min(3)=                     | 7 -> 25 | -0.00415 |       |            |         | min(4)=                     | 8 -> 17 | -0.01265 |  |  |
|    |            | min(4)=                     | 6 -> 33 | -0.00191 |       |            |         | min(5)=                     | 6 -> 17 | -0.00987 |  |  |
|    |            | min(5)=                     | 7 -> 30 | -0.00183 |       |            |         | #CIs=49 #CIs>0=22 #CIs<0=25 |         |          |  |  |
|    |            | #CIs=30 #CIs>0=18 #CIs<0=11 |         |          | 13    | Singlet-B1 | 11.0167 | 112.54                      | 0.0021  | 0.000    |  |  |
| 10 | Singlet-B2 | 9.8143                      | 126.33  | 0.1778   | 0.000 |            |         | max(1)=                     | 8 -> 14 | 0.70172  |  |  |
|    |            | max(1)=                     | 8 -> 11 | 0.63905  |       |            |         | max(2)=                     | 8 -> 20 | 0.06167  |  |  |
|    |            | max(2)=                     | 7 -> 17 | 0.08951  |       |            |         | max(3)=                     | 8 -> 26 | 0.01052  |  |  |
|    |            | max(3)=                     | 9 -> 25 | 0.04407  |       |            |         | max(4)=                     | 9 -> 17 | 0.00758  |  |  |
|    |            |                             |         |          |       |            |         | max(5)=                     | 7 -> 25 | 0.00750  |  |  |



|    |            |         |         |           |           |       |            |         |         |           |           |  |
|----|------------|---------|---------|-----------|-----------|-------|------------|---------|---------|-----------|-----------|--|
|    |            |         | min(5)= | 6 -> 10   | -0.01628  |       |            |         |         |           |           |  |
|    |            |         | #CIs=49 | #CIs>0=24 | #CIs<0=23 | 23    | Singlet-B2 | 14.3271 | 86.54   | 0.1762    | 0.000     |  |
|    |            |         |         |           |           |       |            | max(1)= | 7 -> 15 | 0.67788   |           |  |
| 20 | Singlet-B2 | 13.1913 |         | 93.99     | 0.0003    | 0.000 |            | max(2)= | 9 -> 25 | 0.04252   |           |  |
|    |            |         | max(1)= | 7 -> 13   | 0.69749   |       |            | max(3)= | 8 -> 18 | 0.03449   |           |  |
|    |            |         | max(2)= | 7 -> 15   | 0.06639   |       |            | max(4)= | 7 -> 10 | 0.03337   |           |  |
|    |            |         | max(3)= | 7 -> 19   | 0.05696   |       |            | max(5)= | 8 -> 11 | 0.02817   |           |  |
|    |            |         | max(4)= | 6 -> 12   | 0.01613   |       |            | min(1)= | 8 -> 16 | -0.13150  |           |  |
|    |            |         | max(5)= | 7 -> 24   | 0.00914   |       |            | min(2)= | 7 -> 17 | -0.08719  |           |  |
|    |            |         | min(1)= | 8 -> 16   | -0.05932  |       |            | min(3)= | 7 -> 13 | -0.07336  |           |  |
|    |            |         | min(2)= | 7 -> 10   | -0.03602  |       |            | min(4)= | 8 -> 12 | -0.06517  |           |  |
|    |            |         | min(3)= | 8 -> 11   | -0.01658  |       |            | min(5)= | 8 -> 22 | -0.02567  |           |  |
|    |            |         | min(4)= | 6 -> 11   | -0.01500  |       |            |         | #CIs=40 | #CIs>0=16 | #CIs<0=23 |  |
|    |            |         | min(5)= | 7 -> 21   | -0.01194  |       |            |         |         |           |           |  |
|    |            |         | #CIs=40 | #CIs>0=20 | #CIs<0=18 | 24    | Singlet-B1 | 14.7434 | 84.09   | 0.0012    | 0.000     |  |
|    |            |         |         |           |           |       |            | max(1)= | 9 -> 19 | 0.70081   |           |  |
| 21 | Singlet-A2 | 13.2692 |         | 93.44     | 0.0000    | 0.000 |            | max(2)= | 9 -> 17 | 0.03232   |           |  |
|    |            |         | max(1)= | 7 -> 14   | 0.70381   |       |            | max(3)= | 8 -> 26 | 0.01141   |           |  |
|    |            |         | max(2)= | 7 -> 20   | 0.06498   |       |            | max(4)= | 8 -> 14 | 0.01006   |           |  |
|    |            |         | max(3)= | 8 -> 25   | 0.00308   |       |            | max(5)= | 9 -> 32 | 0.00952   |           |  |
|    |            |         | max(4)= | 9 -> 11   | 0.00167   |       |            | min(1)= | 9 -> 13 | -0.06448  |           |  |
|    |            |         | max(5)= | 6 -> 25   | 0.00143   |       |            | min(2)= | 9 -> 21 | -0.05497  |           |  |
|    |            |         | min(1)= | 9 -> 18   | -0.01854  |       |            | min(3)= | 9 -> 10 | -0.00980  |           |  |
|    |            |         | min(2)= | 9 -> 16   | -0.00596  |       |            | min(4)= | 8 -> 20 | -0.00731  |           |  |
|    |            |         | min(3)= | 9 -> 22   | -0.00457  |       |            | min(5)= | 9 -> 23 | -0.00542  |           |  |
|    |            |         | min(4)= | 9 -> 12   | -0.00373  |       |            |         | #CIs=30 | #CIs>0=13 | #CIs<0=16 |  |
|    |            |         | min(5)= | 7 -> 31   | -0.00189  |       |            |         |         |           |           |  |
|    |            |         | #CIs=21 | #CIs>0=10 | #CIs<0=11 | 25    | Singlet-B2 | 14.8207 | 83.66   | 0.2415    | 0.000     |  |
|    |            |         |         |           |           |       |            | max(1)= | 7 -> 17 | 0.68011   |           |  |
| 22 | Singlet-A2 | 14.0257 |         | 88.40     | 0.0000    | 0.000 |            | max(2)= | 7 -> 10 | 0.11999   |           |  |
|    |            |         | max(1)= | 9 -> 18   | 0.70263   |       |            | max(3)= | 7 -> 15 | 0.10272   |           |  |
|    |            |         | max(2)= | 9 -> 28   | 0.02116   |       |            | max(4)= | 8 -> 16 | 0.06026   |           |  |
|    |            |         | max(3)= | 7 -> 14   | 0.01835   |       |            | max(5)= | 8 -> 12 | 0.04516   |           |  |
|    |            |         | max(4)= | 9 -> 22   | 0.01648   |       |            | min(1)= | 8 -> 18 | -0.04790  |           |  |
|    |            |         | max(5)= | 9 -> 16   | 0.01646   |       |            | min(2)= | 7 -> 19 | -0.04553  |           |  |
|    |            |         | min(1)= | 9 -> 12   | -0.06344  |       |            | min(3)= | 8 -> 11 | -0.03767  |           |  |
|    |            |         | min(2)= | 9 -> 11   | -0.02973  |       |            | min(4)= | 9 -> 25 | -0.02276  |           |  |
|    |            |         | min(3)= | 9 -> 29   | -0.00574  |       |            | min(5)= | 6 -> 11 | -0.01335  |           |  |
|    |            |         | min(4)= | 8 -> 25   | -0.00106  |       |            |         | #CIs=40 | #CIs>0=24 | #CIs<0=14 |  |
|    |            |         | min(5)= | 7 -> 26   | -0.00058  |       |            |         |         |           |           |  |
|    |            |         | #CIs=21 | #CIs>0=13 | #CIs<0=7  | 26    | Singlet-A1 | 14.9766 | 82.79   | 0.0638    | 0.000     |  |

|    |            |                             |         |          |       |            |         |                             |         |          |  |  |
|----|------------|-----------------------------|---------|----------|-------|------------|---------|-----------------------------|---------|----------|--|--|
|    |            | max(1)=                     | 7 -> 16 | 0.65021  |       |            |         | max(3)=                     | 8 -> 26 | 0.03964  |  |  |
|    |            | max(2)=                     | 9 -> 20 | 0.24160  |       |            |         | max(4)=                     | 7 -> 25 | 0.03951  |  |  |
|    |            | max(3)=                     | 7 -> 11 | 0.10509  |       |            |         | max(5)=                     | 9 -> 24 | 0.01438  |  |  |
|    |            | max(4)=                     | 8 -> 17 | 0.03890  |       |            |         | min(1)=                     | 8 -> 20 | -0.14525 |  |  |
|    |            | max(5)=                     | 8 -> 19 | 0.01197  |       |            |         | min(2)=                     | 9 -> 23 | -0.03525 |  |  |
|    |            | min(1)=                     | 8 -> 15 | -0.03894 |       |            |         | min(3)=                     | 9 -> 17 | -0.02302 |  |  |
|    |            | min(2)=                     | 7 -> 18 | -0.03694 |       |            |         | min(4)=                     | 6 -> 20 | -0.02017 |  |  |
|    |            | min(3)=                     | 9 -> 26 | -0.02848 |       |            |         | min(5)=                     | 6 -> 14 | -0.01276 |  |  |
|    |            | min(4)=                     | 7 -> 22 | -0.02824 |       |            |         | #CIs=30 #CIs>0=11 #CIs<0=18 |         |          |  |  |
|    |            | min(5)=                     | 8 -> 21 | -0.02399 |       |            |         |                             |         |          |  |  |
|    |            | #CIs=49 #CIs>0=25 #CIs<0=22 |         |          | 30    | Singlet-A2 | 17.8273 | 69.55                       | 0.0000  | 0.000    |  |  |
|    |            |                             |         |          |       |            |         | max(1)=                     | 9 -> 22 | 0.70340  |  |  |
| 27 | Singlet-A1 | 15.9097                     | 77.93   | 0.0247   | 0.000 |            |         | max(2)=                     | 9 -> 16 | 0.06399  |  |  |
|    |            | max(1)=                     | 9 -> 20 | 0.60937  |       |            |         | max(3)=                     | 9 -> 12 | 0.01214  |  |  |
|    |            | max(2)=                     | 8 -> 13 | 0.07183  |       |            |         | max(4)=                     | 9 -> 34 | 0.01176  |  |  |
|    |            | max(3)=                     | 6 -> 10 | 0.06076  |       |            |         | max(5)=                     | 7 -> 14 | 0.00567  |  |  |
|    |            | max(4)=                     | 7 -> 11 | 0.05139  |       |            |         | min(1)=                     | 9 -> 18 | -0.01720 |  |  |
|    |            | max(5)=                     | 8 -> 21 | 0.04047  |       |            |         | min(2)=                     | 9 -> 28 | -0.01491 |  |  |
|    |            | min(1)=                     | 7 -> 16 | -0.22814 |       |            |         | min(3)=                     | 9 -> 11 | -0.01220 |  |  |
|    |            | min(2)=                     | 8 -> 19 | -0.22674 |       |            |         | min(4)=                     | 7 -> 20 | -0.01049 |  |  |
|    |            | min(3)=                     | 7 -> 18 | -0.06616 |       |            |         | min(5)=                     | 7 -> 26 | -0.00272 |  |  |
|    |            | min(4)=                     | 8 -> 17 | -0.05976 |       |            |         | #CIs=21 #CIs>0=9 #CIs<0=12  |         |          |  |  |
|    |            | min(5)=                     | 6 -> 17 | -0.05210 |       |            |         |                             |         |          |  |  |
|    |            | #CIs=49 #CIs>0=24 #CIs<0=23 |         |          | 31    | Singlet-B1 | 18.0813 | 68.57                       | 0.0000  | 0.000    |  |  |
|    |            |                             |         |          |       |            |         | max(1)=                     | 8 -> 20 | 0.68834  |  |  |
| 28 | Singlet-B2 | 16.9734                     | 73.05   | 0.0039   | 0.000 |            |         | max(2)=                     | 9 -> 21 | 0.14149  |  |  |
|    |            | max(1)=                     | 8 -> 18 | 0.69812  |       |            |         | max(3)=                     | 8 -> 26 | 0.02785  |  |  |
|    |            | max(2)=                     | 8 -> 22 | 0.04963  |       |            |         | max(4)=                     | 7 -> 25 | 0.02197  |  |  |
|    |            | max(3)=                     | 7 -> 17 | 0.04650  |       |            |         | max(5)=                     | 9 -> 19 | 0.01889  |  |  |
|    |            | max(4)=                     | 8 -> 16 | 0.03778  |       |            |         | min(1)=                     | 8 -> 14 | -0.06142 |  |  |
|    |            | max(5)=                     | 6 -> 12 | 0.01871  |       |            |         | min(2)=                     | 9 -> 27 | -0.01308 |  |  |
|    |            | min(1)=                     | 8 -> 12 | -0.04793 |       |            |         | min(3)=                     | 6 -> 14 | -0.01257 |  |  |
|    |            | min(2)=                     | 8 -> 11 | -0.03995 |       |            |         | min(4)=                     | 9 -> 23 | -0.01196 |  |  |
|    |            | min(3)=                     | 9 -> 25 | -0.02765 |       |            |         | min(5)=                     | 6 -> 20 | -0.00896 |  |  |
|    |            | min(4)=                     | 7 -> 15 | -0.02096 |       |            |         | #CIs=30 #CIs>0=11 #CIs<0=17 |         |          |  |  |
|    |            | min(5)=                     | 7 -> 21 | -0.01447 |       |            |         |                             |         |          |  |  |
|    |            | #CIs=40 #CIs>0=25 #CIs<0=14 |         |          | 32    | Singlet-A1 | 18.2286 | 68.02                       | 0.0018  | 0.000    |  |  |
|    |            |                             |         |          |       |            |         | max(1)=                     | 8 -> 19 | 0.61500  |  |  |
| 29 | Singlet-B1 | 17.5688                     | 70.57   | 0.0355   | 0.000 |            |         | max(2)=                     | 9 -> 20 | 0.14251  |  |  |
|    |            | max(1)=                     | 9 -> 21 | 0.68589  |       |            |         | max(3)=                     | 6 -> 10 | 0.12815  |  |  |
|    |            | max(2)=                     | 9 -> 19 | 0.05225  |       |            |         | max(4)=                     | 7 -> 11 | 0.05560  |  |  |



```

min(4)=      9 -> 14      -0.02604      #CIs=40 #CIs>0=14 #CIs<0=25
min(5)=      7 -> 11      -0.02602
#CIs=49 #CIs>0=20 #CIs<0=27      40      Singlet-B2      21.4084      57.91      0.0128      0.000
max(1)=      6 -> 12      0.63167
39      Singlet-B2      20.9056      59.31      0.0121      0.000      max(2)=      6 -> 11      0.29795
max(1)=      8 -> 22      0.68155      max(3)=      7 -> 21      0.06648
max(2)=      7 -> 21      0.12328      max(4)=      6 -> 18      0.05626
max(3)=      9 -> 25      0.10096      max(5)=      9 -> 25      0.03342
max(4)=      6 -> 11      0.05097      min(1)=      7 -> 19      -0.04818
max(5)=      8 -> 16      0.04340      min(2)=      6 -> 16      -0.01384
min(1)=      8 -> 18      -0.03953      min(3)=      7 -> 17      -0.00918
min(2)=      7 -> 23      -0.03637      min(4)=      8 -> 18      -0.00881
min(3)=      6 -> 12      -0.03596      min(5)=      7 -> 23      -0.00781
min(4)=      7 -> 17      -0.02271      #CIs=40 #CIs>0=17 #CIs<0=22
min(5)=      6 -> 16      -0.00929

```

### 8.2.3 Main contributions from different excited states at CIS approach

```

#_exc.st ___symm___      Exc.E Osc._Strength      ___f___ _<S**2>_      min(2)=      9 -> 15      -0.13769
min(3)=      9 -> 23      -0.03448
1      Singlet-A2      6.5227      190.08      0.0000      0.000      min(4)=      9 -> 21      -0.02287
max(1)=      9 -> 16      0.49044      min(5)=      9 -> 12      -0.02260
max(2)=      9 -> 14      0.42062      #CIs=29 #CIs>0=12 #CIs<0=17
max(3)=      9 -> 28      0.01715
max(4)=      9 -> 18      0.00637      3      Singlet-A2      8.3178      149.06      0.0000      0.000
max(5)=      7 -> 13      0.00368      max(1)=      9 -> 11      0.58575
min(1)=      9 -> 11      -0.26651      max(2)=      9 -> 14      0.37733
min(2)=      9 -> 22      -0.10463      max(3)=      9 -> 18      0.11920
min(3)=      9 -> 34      -0.01290      max(4)=      9 -> 28      0.01130
min(4)=      6 -> 30      -0.00472      max(5)=      9 -> 22      0.01018
min(5)=      7 -> 31      -0.00163      min(1)=      9 -> 16      -0.00501
#CIs=21 #CIs>0=14 #CIs<0=7      min(2)=      9 -> 29      -0.00210
min(3)=      6 -> 25      -0.00208
2      Singlet-B1      6.5983      187.90      0.0563      0.000      min(4)=      8 -> 25      -0.00197
max(1)=      9 -> 10      0.64239      min(5)=      9 -> 37      -0.00070
max(2)=      9 -> 19      0.03151      #CIs=21 #CIs>0=11 #CIs<0=10
max(3)=      9 -> 35      0.00433
max(4)=      9 -> 36      0.00367      4      Singlet-B1      8.5688      144.69      0.0265      0.000
max(5)=      9 -> 27      0.00300      max(1)=      9 -> 12      0.69437
min(1)=      9 -> 17      -0.25373      max(2)=      9 -> 19      0.11305

```





|    |            |                             |         |          |       |  |                             |         |          |        |       |
|----|------------|-----------------------------|---------|----------|-------|--|-----------------------------|---------|----------|--------|-------|
|    |            | min(2)=                     | 7 -> 17 | -0.07921 |       |  | min(4)=                     | 9 -> 27 | -0.00431 |        |       |
|    |            | min(3)=                     | 8 -> 22 | -0.05494 |       |  | min(5)=                     | 9 -> 19 | -0.00324 |        |       |
|    |            | min(4)=                     | 7 -> 21 | -0.05129 |       |  | #CIs=29 #CIs>0=12 #CIs<0=17 |         |          |        |       |
|    |            | min(5)=                     | 9 -> 25 | -0.05098 |       |  |                             |         |          |        |       |
|    |            | #CIs=39 #CIs>0=25 #CIs<0=14 |         |          | 14    |  | Singlet-B2                  | 12.1946 | 101.67   | 0.3237 | 0.000 |
|    |            |                             |         |          |       |  | max(1)=                     | 7 -> 10 | 0.60063  |        |       |
| 11 | Singlet-B2 | 11.3469                     | 109.27  | 0.0061   | 0.000 |  | max(2)=                     | 7 -> 12 | 0.06986  |        |       |
|    |            | max(1)=                     | 8 -> 11 | 0.49666  |       |  | max(3)=                     | 7 -> 19 | 0.06028  |        |       |
|    |            | max(2)=                     | 8 -> 14 | 0.42610  |       |  | max(4)=                     | 8 -> 16 | 0.02002  |        |       |
|    |            | max(3)=                     | 7 -> 10 | 0.20797  |       |  | max(5)=                     | 6 -> 16 | 0.01014  |        |       |
|    |            | max(4)=                     | 8 -> 18 | 0.11406  |       |  | min(1)=                     | 7 -> 17 | -0.22526 |        |       |
|    |            | max(5)=                     | 8 -> 16 | 0.03385  |       |  | min(2)=                     | 8 -> 14 | -0.20293 |        |       |
|    |            | min(1)=                     | 7 -> 17 | -0.10755 |       |  | min(3)=                     | 8 -> 11 | -0.13718 |        |       |
|    |            | min(2)=                     | 7 -> 15 | -0.02332 |       |  | min(4)=                     | 7 -> 15 | -0.12838 |        |       |
|    |            | min(3)=                     | 9 -> 25 | -0.01713 |       |  | min(5)=                     | 6 -> 11 | -0.02808 |        |       |
|    |            | min(4)=                     | 7 -> 21 | -0.01680 |       |  | #CIs=39 #CIs>0=18 #CIs<0=21 |         |          |        |       |
|    |            | min(5)=                     | 6 -> 11 | -0.01480 |       |  |                             |         |          |        |       |
|    |            | #CIs=39 #CIs>0=22 #CIs<0=16 |         |          | 15    |  | Singlet-A1                  | 12.5694 | 98.64    | 0.0002 | 0.000 |
|    |            |                             |         |          |       |  | max(1)=                     | 8 -> 17 | 0.46224  |        |       |
| 12 | Singlet-A1 | 11.7640                     | 105.39  | 0.0130   | 0.000 |  | max(2)=                     | 7 -> 11 | 0.11189  |        |       |
|    |            | max(1)=                     | 8 -> 12 | 0.68494  |       |  | max(3)=                     | 8 -> 21 | 0.10632  |        |       |
|    |            | max(2)=                     | 8 -> 10 | 0.09164  |       |  | max(4)=                     | 8 -> 10 | 0.09383  |        |       |
|    |            | max(3)=                     | 8 -> 19 | 0.08109  |       |  | max(5)=                     | 7 -> 22 | 0.03225  |        |       |
|    |            | max(4)=                     | 7 -> 16 | 0.07525  |       |  | min(1)=                     | 8 -> 15 | -0.45146 |        |       |
|    |            | max(5)=                     | 9 -> 13 | 0.04747  |       |  | min(2)=                     | 7 -> 16 | -0.16463 |        |       |
|    |            | min(1)=                     | 7 -> 11 | -0.05168 |       |  | min(3)=                     | 7 -> 14 | -0.14176 |        |       |
|    |            | min(2)=                     | 9 -> 20 | -0.05038 |       |  | min(4)=                     | 8 -> 23 | -0.00950 |        |       |
|    |            | min(3)=                     | 7 -> 18 | -0.02623 |       |  | min(5)=                     | 9 -> 20 | -0.00835 |        |       |
|    |            | min(4)=                     | 7 -> 22 | -0.02377 |       |  | #CIs=47 #CIs>0=22 #CIs<0=25 |         |          |        |       |
|    |            | min(5)=                     | 8 -> 21 | -0.01438 |       |  |                             |         |          |        |       |
|    |            | #CIs=47 #CIs>0=21 #CIs<0=26 |         |          | 16    |  | Singlet-A1                  | 13.3328 | 92.99    | 0.0645 | 0.000 |
|    |            |                             |         |          |       |  | max(1)=                     | 8 -> 15 | 0.46535  |        |       |
| 13 | Singlet-B1 | 11.8629                     | 104.51  | 0.0055   | 0.000 |  | max(2)=                     | 7 -> 11 | 0.32126  |        |       |
|    |            | max(1)=                     | 8 -> 13 | 0.69367  |       |  | max(3)=                     | 8 -> 17 | 0.18482  |        |       |
|    |            | max(2)=                     | 8 -> 20 | 0.11096  |       |  | max(4)=                     | 8 -> 10 | 0.17879  |        |       |
|    |            | max(3)=                     | 9 -> 17 | 0.02142  |       |  | max(5)=                     | 8 -> 23 | 0.04971  |        |       |
|    |            | max(4)=                     | 7 -> 25 | 0.01109  |       |  | min(1)=                     | 7 -> 16 | -0.22566 |        |       |
|    |            | max(5)=                     | 8 -> 26 | 0.00988  |       |  | min(2)=                     | 7 -> 14 | -0.22559 |        |       |
|    |            | min(1)=                     | 9 -> 15 | -0.07336 |       |  | min(3)=                     | 9 -> 20 | -0.05126 |        |       |
|    |            | min(2)=                     | 9 -> 12 | -0.01404 |       |  | min(4)=                     | 8 -> 19 | -0.04961 |        |       |
|    |            | min(3)=                     | 6 -> 26 | -0.00436 |       |  | min(5)=                     | 6 -> 12 | -0.01471 |        |       |

|    |            |                             |         |          |            |                             |         |          |       |
|----|------------|-----------------------------|---------|----------|------------|-----------------------------|---------|----------|-------|
|    |            | #CIs=48 #CIs>0=24 #CIs<0=23 |         | 20       | Singlet-A2 | 14.5870                     | 85.00   | 0.0000   | 0.000 |
|    |            |                             |         |          |            | max(1)=                     | 7 -> 13 | 0.69796  |       |
| 17 | Singlet-B2 | 13.5681                     | 91.38   | 0.0366   | 0.000      | max(2)=                     | 7 -> 20 | 0.11248  |       |
|    |            | max(1)=                     | 8 -> 14 | 0.32443  |            | max(3)=                     | 7 -> 26 | 0.00596  |       |
|    |            | max(2)=                     | 8 -> 22 | 0.09473  |            | max(4)=                     | 8 -> 25 | 0.00525  |       |
|    |            | max(3)=                     | 7 -> 10 | 0.06733  |            | max(5)=                     | 7 -> 31 | 0.00521  |       |
|    |            | max(4)=                     | 7 -> 17 | 0.04674  |            | min(1)=                     | 9 -> 16 | -0.00456 |       |
|    |            | max(5)=                     | 7 -> 21 | 0.03721  |            | min(2)=                     | 9 -> 14 | -0.00449 |       |
|    |            | min(1)=                     | 8 -> 16 | -0.54074 |            | min(3)=                     | 6 -> 25 | -0.00423 |       |
|    |            | min(2)=                     | 8 -> 11 | -0.26899 |            | min(4)=                     | 9 -> 11 | -0.00319 |       |
|    |            | min(3)=                     | 7 -> 15 | -0.09863 |            | min(5)=                     | 9 -> 22 | -0.00304 |       |
|    |            | min(4)=                     | 7 -> 12 | -0.02071 |            | #CIs=21 #CIs>0=10 #CIs<0=11 |         |          |       |
|    |            | min(5)=                     | 7 -> 23 | -0.01363 |            |                             |         |          |       |
|    |            | #CIs=39 #CIs>0=15 #CIs<0=23 |         | 21       | Singlet-B2 | 14.6146                     | 84.84   | 0.0010   | 0.000 |
|    |            |                             |         |          |            | max(1)=                     | 7 -> 12 | 0.68744  |       |
| 18 | Singlet-A1 | 13.6718                     | 90.69   | 0.3968   | 0.000      | max(2)=                     | 7 -> 15 | 0.09721  |       |
|    |            | max(1)=                     | 8 -> 17 | 0.40246  |            | max(3)=                     | 7 -> 19 | 0.09134  |       |
|    |            | max(2)=                     | 8 -> 15 | 0.23207  |            | max(4)=                     | 6 -> 14 | 0.02397  |       |
|    |            | max(3)=                     | 7 -> 16 | 0.20686  |            | max(5)=                     | 8 -> 14 | 0.02176  |       |
|    |            | max(4)=                     | 8 -> 10 | 0.19007  |            | min(1)=                     | 7 -> 10 | -0.07295 |       |
|    |            | max(5)=                     | 9 -> 20 | 0.16130  |            | min(2)=                     | 8 -> 16 | -0.03018 |       |
|    |            | min(1)=                     | 7 -> 11 | -0.37018 |            | min(3)=                     | 7 -> 21 | -0.02906 |       |
|    |            | min(2)=                     | 8 -> 12 | -0.07097 |            | min(4)=                     | 8 -> 11 | -0.02359 |       |
|    |            | min(3)=                     | 9 -> 13 | -0.06362 |            | min(5)=                     | 7 -> 17 | -0.02095 |       |
|    |            | min(4)=                     | 7 -> 18 | -0.04802 |            | #CIs=39 #CIs>0=22 #CIs<0=17 |         |          |       |
|    |            | min(5)=                     | 9 -> 26 | -0.02918 |            |                             |         |          |       |
|    |            | #CIs=48 #CIs>0=31 #CIs<0=16 |         | 22       | Singlet-A2 | 14.7664                     | 83.96   | 0.0000   | 0.000 |
|    |            |                             |         |          |            | max(1)=                     | 9 -> 18 | 0.69305  |       |
| 19 | Singlet-A1 | 14.2641                     | 86.92   | 0.1355   | 0.000      | max(2)=                     | 9 -> 22 | 0.04602  |       |
|    |            | max(1)=                     | 7 -> 14 | 0.51662  |            | max(3)=                     | 9 -> 28 | 0.04395  |       |
|    |            | max(2)=                     | 7 -> 11 | 0.42603  |            | max(4)=                     | 9 -> 16 | 0.01981  |       |
|    |            | max(3)=                     | 7 -> 16 | 0.16742  |            | max(5)=                     | 9 -> 34 | 0.01715  |       |
|    |            | max(4)=                     | 8 -> 17 | 0.11107  |            | min(1)=                     | 9 -> 11 | -0.09065 |       |
|    |            | max(5)=                     | 7 -> 18 | 0.08091  |            | min(2)=                     | 9 -> 14 | -0.08078 |       |
|    |            | min(1)=                     | 9 -> 26 | -0.04262 |            | min(3)=                     | 9 -> 29 | -0.01071 |       |
|    |            | min(2)=                     | 6 -> 10 | -0.02424 |            | min(4)=                     | 6 -> 25 | -0.00489 |       |
|    |            | min(3)=                     | 6 -> 21 | -0.01428 |            | min(5)=                     | 8 -> 25 | -0.00470 |       |
|    |            | min(4)=                     | 7 -> 22 | -0.01373 |            | #CIs=21 #CIs>0=11 #CIs<0=9  |         |          |       |
|    |            | min(5)=                     | 8 -> 23 | -0.00971 |            |                             |         |          |       |
|    |            | #CIs=48 #CIs>0=21 #CIs<0=26 |         | 23       | Singlet-B1 | 15.4506                     | 80.25   | 0.0006   | 0.000 |
|    |            |                             |         |          |            | max(1)=                     | 9 -> 19 | 0.68763  |       |



|    |            |                             |         |          |       |            |                             |         |              |
|----|------------|-----------------------------|---------|----------|-------|------------|-----------------------------|---------|--------------|
|    |            | min(1)=                     | 8 -> 20 | -0.23127 |       |            | min(3)=                     | 8 -> 12 | -0.05243     |
|    |            | min(2)=                     | 9 -> 17 | -0.07871 |       |            | min(4)=                     | 7 -> 22 | -0.05164     |
|    |            | min(3)=                     | 9 -> 23 | -0.03743 |       |            | min(5)=                     | 8 -> 17 | -0.04092     |
|    |            | min(4)=                     | 6 -> 20 | -0.01985 |       |            | #CIs=49 #CIs>0=24 #CIs<0=23 |         |              |
|    |            | min(5)=                     | 9 -> 36 | -0.01244 |       |            |                             |         |              |
|    |            | #CIs=29 #CIs>0=12 #CIs<0=17 |         |          | 33    | Singlet-A1 | 21.1122                     | 58.73   | 0.0139 0.000 |
| 30 | Singlet-A2 | 18.9977                     | 65.26   | 0.0000   | 0.000 |            | max(1)=                     | 7 -> 18 | 0.54241      |
|    |            | max(1)=                     | 9 -> 22 | 0.68842  |       |            | max(2)=                     | 8 -> 21 | 0.36841      |
|    |            | max(2)=                     | 9 -> 16 | 0.14728  |       |            | max(3)=                     | 8 -> 19 | 0.19227      |
|    |            | max(3)=                     | 9 -> 34 | 0.02703  |       |            | max(4)=                     | 9 -> 20 | 0.09807      |
|    |            | max(4)=                     | 6 -> 30 | 0.00485  |       |            | max(5)=                     | 8 -> 15 | 0.04426      |
|    |            | max(5)=                     | 7 -> 13 | 0.00460  |       |            | min(1)=                     | 9 -> 26 | -0.06394     |
|    |            | min(1)=                     | 9 -> 18 | -0.04861 |       |            | min(2)=                     | 8 -> 23 | -0.05659     |
|    |            | min(2)=                     | 9 -> 28 | -0.03300 |       |            | min(3)=                     | 8 -> 17 | -0.05002     |
|    |            | min(3)=                     | 8 -> 25 | -0.00660 |       |            | min(4)=                     | 7 -> 11 | -0.04866     |
|    |            | min(4)=                     | 9 -> 29 | -0.00606 |       |            | min(5)=                     | 7 -> 14 | -0.04314     |
|    |            | min(5)=                     | 9 -> 37 | -0.00514 |       |            | #CIs=49 #CIs>0=25 #CIs<0=22 |         |              |
|    |            | #CIs=21 #CIs>0=8 #CIs<0=13  |         |          | 34    | Singlet-B2 | 21.5193                     | 57.62   | 0.0041 0.000 |
| 31 | Singlet-B1 | 19.0207                     | 65.18   | 0.0035   | 0.000 |            | max(1)=                     | 7 -> 19 | 0.68470      |
|    |            | max(1)=                     | 8 -> 20 | 0.65655  |       |            | max(2)=                     | 7 -> 17 | 0.08298      |
|    |            | max(2)=                     | 9 -> 21 | 0.22658  |       |            | max(3)=                     | 7 -> 15 | 0.05569      |
|    |            | max(3)=                     | 7 -> 25 | 0.03447  |       |            | max(4)=                     | 6 -> 16 | 0.05139      |
|    |            | max(4)=                     | 8 -> 26 | 0.03269  |       |            | max(5)=                     | 6 -> 14 | 0.04631      |
|    |            | max(5)=                     | 9 -> 24 | 0.02881  |       |            | min(1)=                     | 7 -> 12 | -0.10098     |
|    |            | min(1)=                     | 8 -> 13 | -0.10860 |       |            | min(2)=                     | 9 -> 25 | -0.04436     |
|    |            | min(2)=                     | 9 -> 17 | -0.03139 |       |            | min(3)=                     | 7 -> 21 | -0.03604     |
|    |            | min(3)=                     | 6 -> 26 | -0.01069 |       |            | min(4)=                     | 7 -> 24 | -0.02160     |
|    |            | min(4)=                     | 9 -> 15 | -0.00857 |       |            | min(5)=                     | 7 -> 10 | -0.01446     |
|    |            | min(5)=                     | 9 -> 36 | -0.00517 |       |            | #CIs=39 #CIs>0=23 #CIs<0=16 |         |              |
|    |            | #CIs=29 #CIs>0=13 #CIs<0=15 |         |          | 35    | Singlet-A2 | 21.7805                     | 56.92   | 0.0000 0.000 |
| 32 | Singlet-A1 | 19.3606                     | 64.04   | 0.0057   | 0.000 |            | max(1)=                     | 7 -> 20 | 0.69685      |
|    |            | max(1)=                     | 8 -> 19 | 0.60591  |       |            | max(2)=                     | 7 -> 33 | 0.02330      |
|    |            | max(2)=                     | 9 -> 20 | 0.17066  |       |            | max(3)=                     | 7 -> 31 | 0.02098      |
|    |            | max(3)=                     | 7 -> 11 | 0.06404  |       |            | max(4)=                     | 7 -> 26 | 0.01511      |
|    |            | max(4)=                     | 7 -> 14 | 0.05160  |       |            | max(5)=                     | 8 -> 25 | 0.01491      |
|    |            | max(5)=                     | 9 -> 26 | 0.03822  |       |            | min(1)=                     | 7 -> 13 | -0.11293     |
|    |            | min(1)=                     | 7 -> 18 | -0.25028 |       |            | min(2)=                     | 6 -> 25 | -0.01006     |
|    |            | min(2)=                     | 7 -> 16 | -0.13781 |       |            | min(3)=                     | 8 -> 30 | -0.00474     |
|    |            |                             |         |          |       |            | min(4)=                     | 9 -> 18 | -0.00455     |

|    |            |         |           |           |       |  |            |         |           |           |       |  |
|----|------------|---------|-----------|-----------|-------|--|------------|---------|-----------|-----------|-------|--|
|    |            | min(5)= | 9 -> 28   | -0.00298  |       |  |            | max(5)= | 6 -> 12   | 0.04296   |       |  |
|    |            | #CIs=21 | #CIs>0=11 | #CIs<0=10 |       |  |            | min(1)= | 6 -> 17   | -0.21465  |       |  |
| 36 | Singlet-A1 | 21.9704 | 56.43     | 0.0001    | 0.000 |  |            | min(2)= | 6 -> 15   | -0.10396  |       |  |
|    |            | max(1)= | 8 -> 21   | 0.56708   |       |  |            | min(3)= | 9 -> 20   | -0.06308  |       |  |
|    |            | max(2)= | 7 -> 22   | 0.06851   |       |  |            | min(4)= | 7 -> 18   | -0.05537  |       |  |
|    |            | max(3)= | 6 -> 17   | 0.06815   |       |  |            | min(5)= | 8 -> 19   | -0.04711  |       |  |
|    |            | max(4)= | 7 -> 16   | 0.06610   |       |  |            | #CIs=49 | #CIs>0=22 | #CIs<0=25 |       |  |
|    |            | max(5)= | 8 -> 27   | 0.05054   | 39    |  | Singlet-B2 | 23.1222 | 53.62     | 0.0003    | 0.000 |  |
|    |            | min(1)= | 7 -> 18   | -0.33552  |       |  |            | max(1)= | 6 -> 16   | 0.46672   |       |  |
|    |            | min(2)= | 6 -> 10   | -0.12972  |       |  |            | max(2)= | 6 -> 14   | 0.40758   |       |  |
|    |            | min(3)= | 9 -> 20   | -0.10719  |       |  |            | max(3)= | 7 -> 23   | 0.01291   |       |  |
|    |            | min(4)= | 8 -> 19   | -0.08926  |       |  |            | max(4)= | 7 -> 17   | 0.00920   |       |  |
|    |            | min(5)= | 8 -> 17   | -0.07249  |       |  |            | max(5)= | 7 -> 27   | 0.00741   |       |  |
|    |            | #CIs=49 | #CIs>0=20 | #CIs<0=27 |       |  |            | min(1)= | 6 -> 11   | -0.30483  |       |  |
| 37 | Singlet-B2 | 22.2530 | 55.72     | 0.0070    | 0.000 |  |            | min(2)= | 6 -> 22   | -0.08648  |       |  |
|    |            | max(1)= | 8 -> 22   | 0.67426   |       |  |            | min(3)= | 9 -> 25   | -0.08632  |       |  |
|    |            | max(2)= | 8 -> 16   | 0.11639   |       |  |            | min(4)= | 7 -> 19   | -0.07349  |       |  |
|    |            | max(3)= | 9 -> 25   | 0.11134   |       |  |            | min(5)= | 8 -> 22   | -0.03450  |       |  |
|    |            | max(4)= | 7 -> 21   | 0.06162   |       |  |            | #CIs=38 | #CIs>0=16 | #CIs<0=22 |       |  |
|    |            | max(5)= | 6 -> 14   | 0.04432   | 40    |  | Singlet-B1 | 23.2765 | 53.27     | 0.0099    | 0.000 |  |
|    |            | min(1)= | 8 -> 18   | -0.07692  |       |  |            | max(1)= | 9 -> 24   | 0.64169   |       |  |
|    |            | min(2)= | 7 -> 17   | -0.03774  |       |  |            | max(2)= | 6 -> 13   | 0.01962   |       |  |
|    |            | min(3)= | 7 -> 23   | -0.03600  |       |  |            | max(3)= | 9 -> 35   | 0.01888   |       |  |
|    |            | min(4)= | 8 -> 28   | -0.02761  |       |  |            | max(4)= | 6 -> 20   | 0.01100   |       |  |
|    |            | min(5)= | 6 -> 28   | -0.01376  |       |  |            | max(5)= | 9 -> 27   | 0.00959   |       |  |
|    |            | #CIs=39 | #CIs>0=20 | #CIs<0=19 |       |  |            | min(1)= | 9 -> 23   | -0.28361  |       |  |
| 38 | Singlet-A1 | 23.1118 | 53.65     | 0.0167    | 0.000 |  |            | min(2)= | 9 -> 21   | -0.05587  |       |  |
|    |            | max(1)= | 6 -> 10   | 0.63434   |       |  |            | min(3)= | 8 -> 26   | -0.03849  |       |  |
|    |            | max(2)= | 8 -> 21   | 0.10634   |       |  |            | min(4)= | 7 -> 25   | -0.03128  |       |  |
|    |            | max(3)= | 7 -> 22   | 0.10216   |       |  |            | min(5)= | 9 -> 32   | -0.02920  |       |  |
|    |            | max(4)= | 9 -> 26   | 0.05384   |       |  |            | #CIs=30 | #CIs>0=17 | #CIs<0=12 |       |  |

# 9 NH<sub>3</sub>

## 9.1 6-311G(d,p)

### 9.1.1 Plots

Figure S13: For NH<sub>3</sub> molecule and 6-311G(d,p) basis set, variation of  $\alpha_{ZZ}$  (top) and  $\beta_{ZZZ}$  (bottom) with respect to the number of orbitals (FIOs decomposition presented in this work, in Plots S13a and S13c) or states (SOS approaches, in Plots S13b and S13d). For  $\alpha$  FIOs, three approaches were considered: CPKS (CAM-B3LYP), CPHF and UPHF. For  $\beta$  FIOs, the results of CPKS and CPHF approaches are provided. All elements of the  $\beta$  tensor were recomputed with an error less than 0.02 au in the case of the FIOs. For SOS approach, TDDFT (CAM-B3LYP) and CIS methods were employed. Recomputed values of  $\alpha_{ZZ}$  and  $\beta_{ZZZ}$  for the different approaches are included in each plot. HOMO (H) and LUMO (L) are represented by blue and pink dotted lines, respectively.

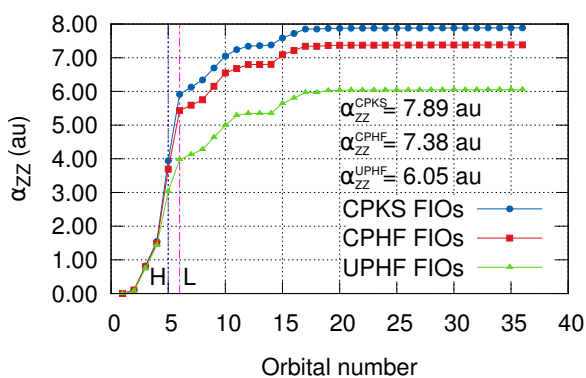

(a) CPKS-, CPHF- and UPHF-FIOs decomposition of  $\alpha_{ZZ}$  into MOs.

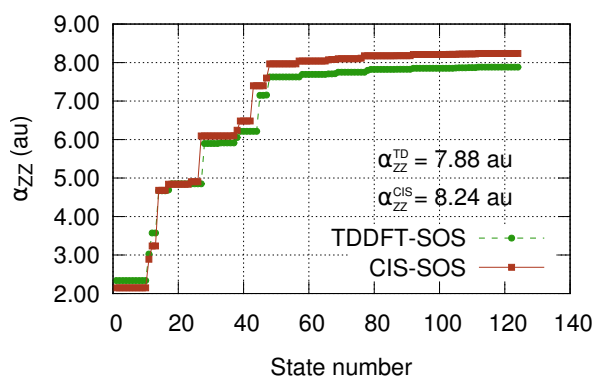

(b) TDDFT- and CIS-SOS decomposition of  $\alpha_{ZZ}$  into states.

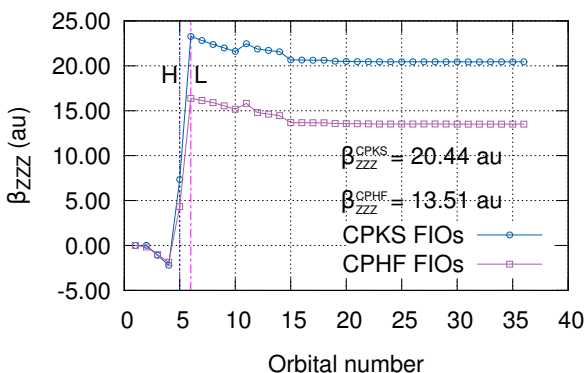

(c) CPKS- and CPHF-FIOs decomposition of  $\beta_{ZZZ}$  into MOs.

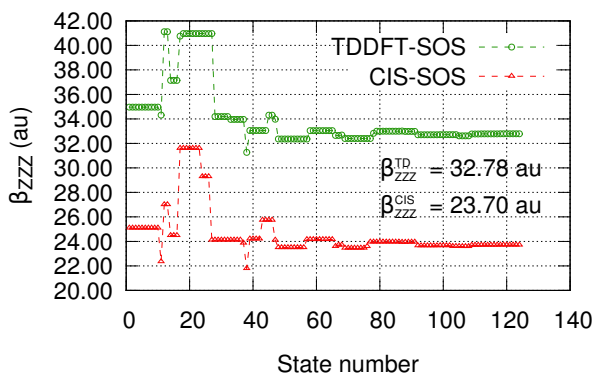

(d) TDDFT- and CIS-SOS decomposition of  $\beta_{ZZZ}$  into states.

## 9.2 6-311++G(d,p)

### 9.2.1 Plots

Figure S14: For  $\text{NH}_3$  molecule and 6-311++G(d,p) basis set, variation of  $\alpha_{ZZ}$  (top) and  $\beta_{ZZZ}$  (bottom) with respect to the number of orbitals (FIOs decomposition presented in this work, in Plots S14a and S14c) or states (SOS approaches, in Plots S14b and S14d). For  $\alpha$  FIOs, three approaches were considered: CPKS (CAM-B3LYP), CPHF and UPHF. For  $\beta$  FIOs, the results of CPKS and CPHF approaches are provided. All elements of the  $\beta$  tensor were recomputed with an error less than 0.12 au in the case of the FIOs. For SOS approach, TDDFT (CAM-B3LYP) and CIS methods were employed. Recomputed values of  $\alpha_{ZZ}$  and  $\beta_{ZZZ}$  for the different approaches are included in each plot. HOMO (H) and LUMO (L) are represented by blue and pink dotted lines, respectively.

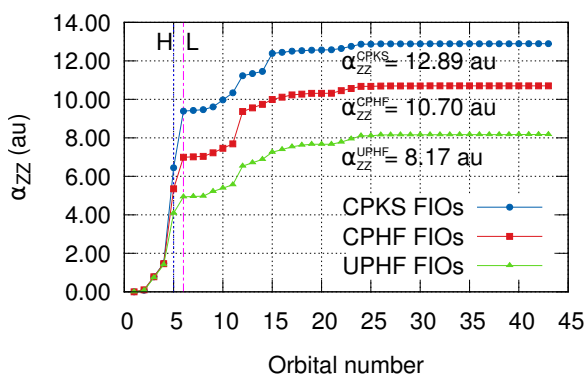

(a) CPKS-, CPHF- and UPHF-FIOs decomposition of  $\alpha_{ZZ}$  into MOs.

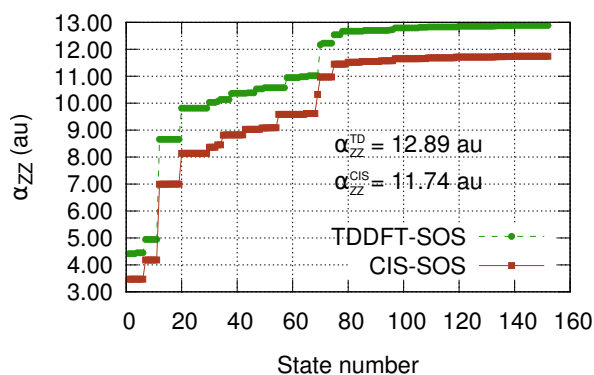

(b) TDDFT- and CIS-SOS decomposition of  $\alpha_{ZZ}$  into states.

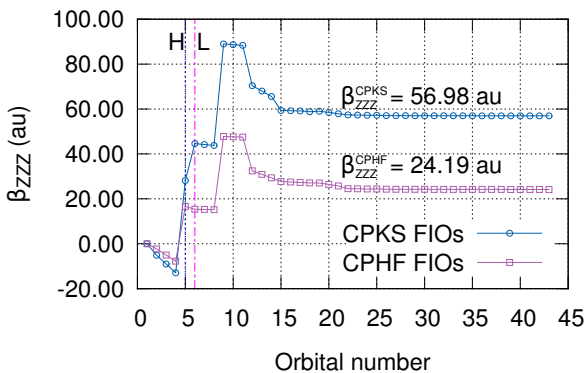

(c) CPKS- and CPHF-FIOs decomposition of  $\beta_{ZZZ}$  into MOs.

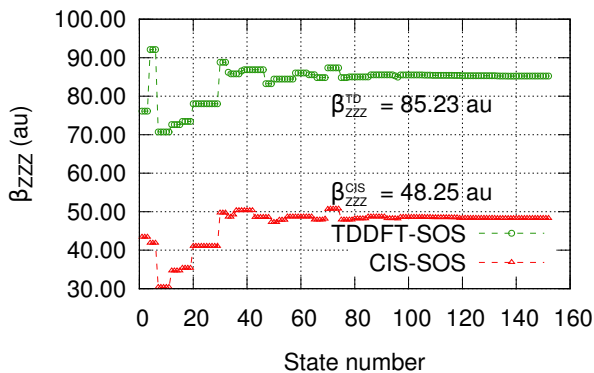

(d) TDDFT- and CIS-SOS decomposition of  $\beta_{ZZZ}$  into states.



# 10 F-CC-H

## 10.1 6-311G(d,p)

### 10.1.1 Plots

Figure S15: For F–C≡C–H molecule and 6-311G(d,p) basis set, variation of  $\alpha_{ZZ}$  (top) and  $\beta_{ZZZ}$  (bottom) with respect to the number of orbitals (FIOs decomposition presented in this work, in Plots S15a and S15c) or states (SOS approaches, in Plots S15b and S15d). For  $\alpha$  FIOs, three approaches were considered: CPKS (CAM-B3LYP), CPHF and UPHF. For  $\beta$  FIOs, the results of CPKS and CPHF approaches are provided. All elements of the  $\beta$  tensor were recomputed with an error less than 0.03 au in the case of the FIOs. For SOS approach, TDDFT (CAM-B3LYP) and CIS methods were employed. Recomputed values of  $\alpha_{ZZ}$  and  $\beta_{ZZZ}$  for the different approaches are included in each plot. HOMO (H) and LUMO (L) are represented by blue and pink dotted lines, respectively.

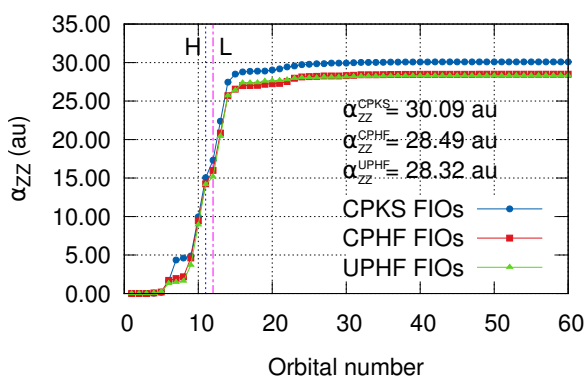

(a) CPKS-, CPHF- and UPHF-FIOs decomposition of  $\alpha_{ZZ}$  into MOs.

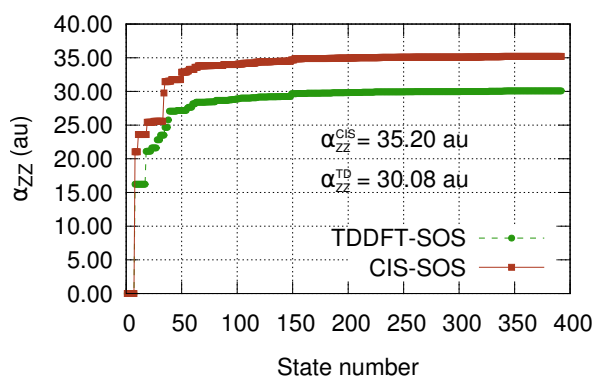

(b) TDDFT- and CIS-SOS decomposition of  $\alpha_{ZZ}$  into states.

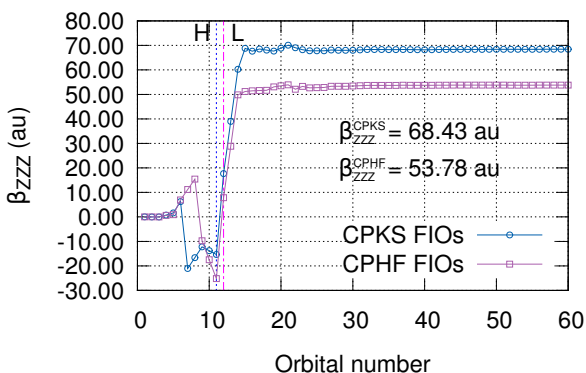

(c) CPKS- and CPHF-FIOs decomposition of  $\beta_{ZZZ}$  into MOs.

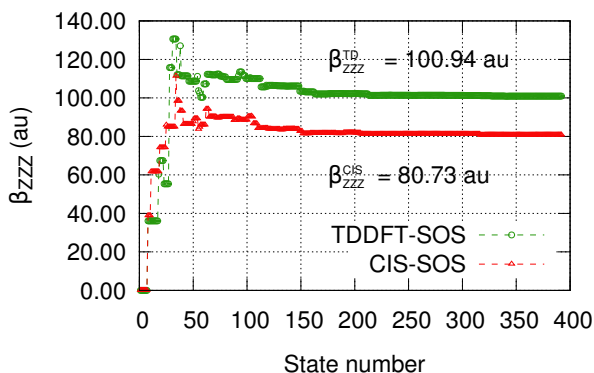

(d) TDDFT- and CIS-SOS decomposition of  $\beta_{ZZZ}$  into states.

## 10.2 6-311++G(d,p)

### 10.2.1 Plots

Figure S16: For F–C≡C–H molecule and 6-311++G(d,p) basis set, variation of  $\alpha_{ZZ}$  (top) and  $\beta_{ZZZ}$  (bottom) with respect to the number of orbitals (FIOs decomposition presented in this work, in Plots S16a and S16c) or states (SOS approaches, in Plots S16b and S16d). For  $\alpha$  FIOs, three approaches were considered: CPKS (CAM-B3LYP), CPHF and UPHF. For  $\beta$  FIOs, the results of CPKS and CPHF approaches are provided. All elements of the  $\beta$  tensor were recomputed with an error less than 0.03 au in the case of the FIOs. For SOS approach, TDDFT (CAM-B3LYP) and CIS methods were employed. Recomputed values of  $\alpha_{ZZ}$  and  $\beta_{ZZZ}$  for the different approaches are included in each plot. HOMO (H) and LUMO (L) are represented by blue and pink dotted lines, respectively.

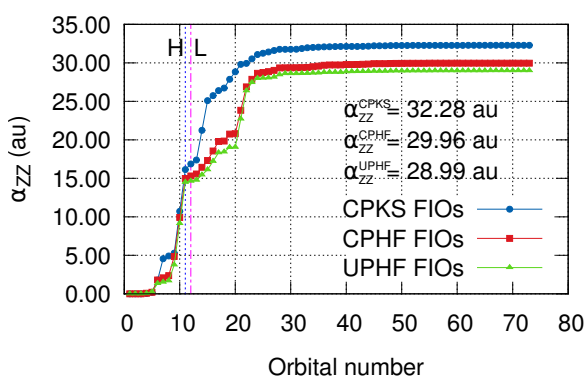

(a) CPKS-, CPHF- and UPHF-FIOs decomposition of  $\alpha_{ZZ}$  into MOs.

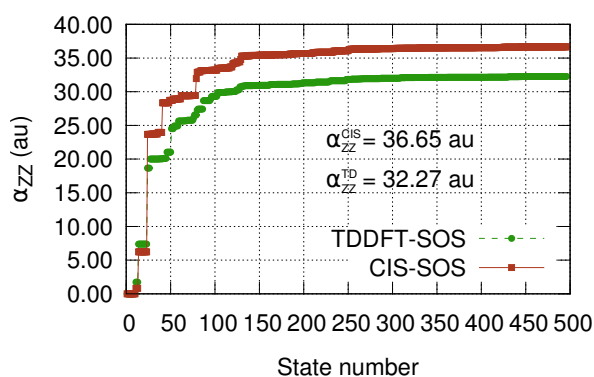

(b) TDDFT- and CIS-SOS decomposition of  $\alpha_{ZZ}$  into states.

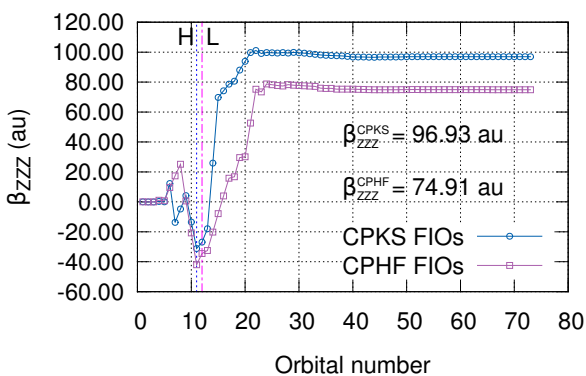

(c) CPKS- and CPHF-FIOs decomposition of  $\beta_{ZZZ}$  into MOs.

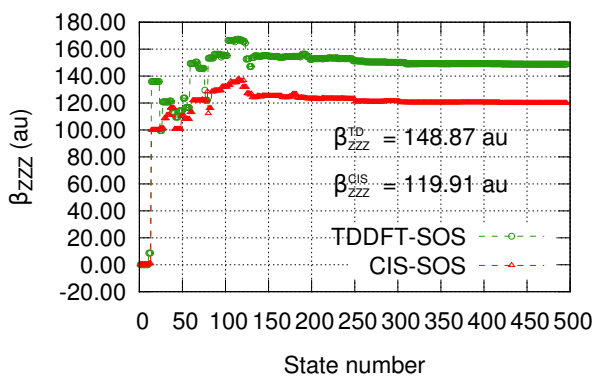

(d) TDDFT- and CIS-SOS decomposition of  $\beta_{ZZZ}$  into states.

# 11 HCCCF<sub>3</sub>

## 11.1 6-311G(d,p)

### 11.1.1 Plots

Figure S17: For H–C≡C–CF<sub>3</sub> molecule and 6-311G(d,p) basis set, variation of  $\alpha_{ZZ}$  (top) and  $\beta_{ZZZ}$  (middle) with respect to the number of orbitals (FIOs decomposition presented in this work, in Plots S17a and S17b) or states (SOS approaches, in Plots S17c and S17d). For  $\alpha$  FIOs, three approaches were considered: CPKS, CPHF and UPHF. For  $\beta$  FIOs, the results of CPKS and CPHF approaches are provided. Besides, a shorten range of number of orbitals/states can be seen in Plots S17e and S17f as well (bottom). All elements of the  $\beta$  tensor were recomputed with an error less than 0.20 au in the case of the FIOs. For SOS approach, TDDFT (CAM-B3LYP) and CIS methods were employed. Recomputed values of  $\alpha_{ZZ}$  and  $\beta_{ZZZ}$  for the different approaches are included in each plot. HOMO (H) and LUMO (L) are represented by blue and pink dotted lines, respectively.

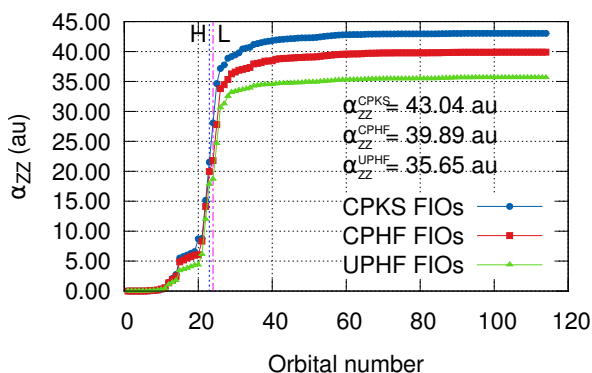

(a) CPKS-, CPHF- and UPHF-FIOs decomposition of  $\alpha_{ZZ}$  into MOs.

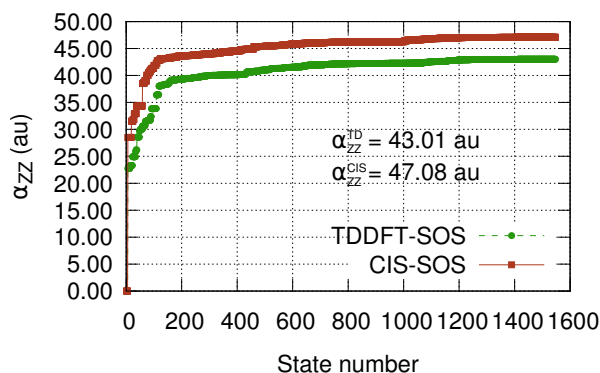

(b) TDDFT- and CIS-SOS decomposition of  $\alpha_{ZZ}$  into states.

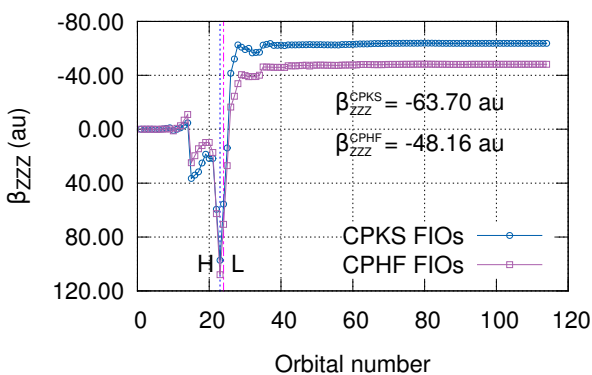

(c) CPKS- and CPHF-FIOs decomposition of  $\beta_{ZZZ}$  into MOs.

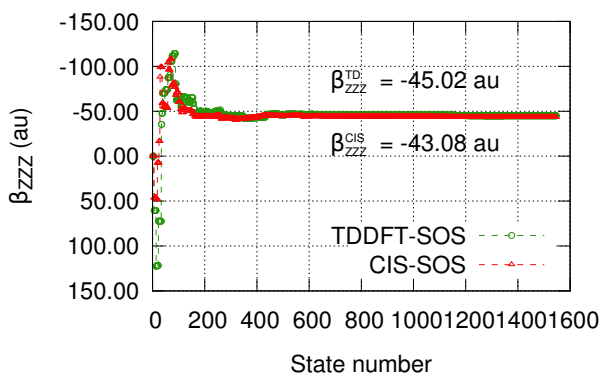

(d) TDDFT- and CIS-SOS decomposition of  $\beta_{ZZZ}$  into states.

Figure S17: (continued) For  $\text{H}-\text{C}\equiv\text{C}-\text{CF}_3$  molecule and 6-311G(d,p) basis set, variation of  $\alpha_{ZZ}$  (top) and  $\beta_{ZZZ}$  (middle) with respect to the number of orbitals (FIOs decomposition presented in this work, in Plots S17a and S17b) or states (SOS approaches, in Plots S17c and S17d). For  $\alpha$  FIOs, three approaches were considered: CPKS, CPHF and UPHF. For  $\beta$  FIOs, the results of CPKS and CPHF approaches are provided. Besides, a shorten range of number of orbitals/states can be seen in Plots S17e and S17f as well (bottom). All elements of the  $\beta$  tensor were recomputed with an error less than 0.20 au in the case of the FIOs. For SOS approach, TDDFT (CAM-B3LYP) and CIS methods were employed. Recomputed values of  $\alpha_{ZZ}$  and  $\beta_{ZZZ}$  for the different approaches are included in each plot. HOMO (H) and LUMO (L) are represented by blue and pink dotted lines, respectively.

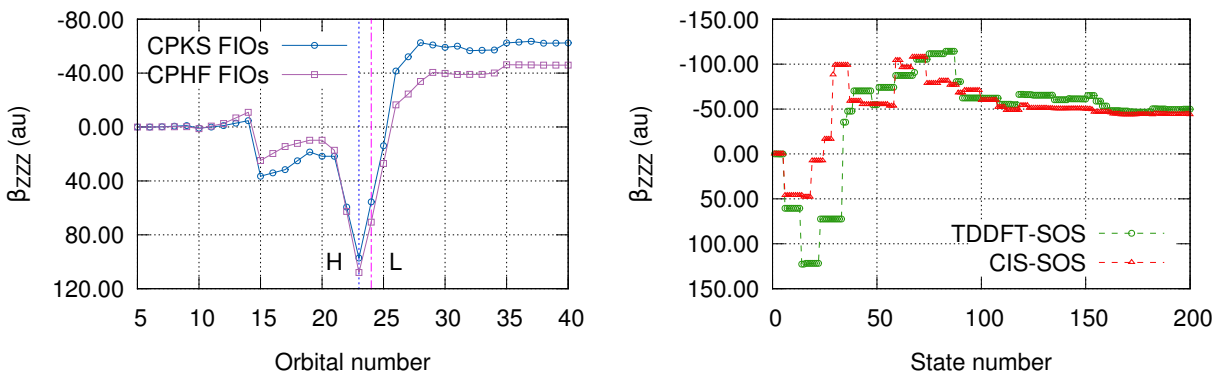

(e) CPKS- and CPHF-FIOs decomposition of  $\beta_{ZZZ}$  between MOs 5 and 40. (f) TDDFT- and CIS-SOS decomposition of  $\beta_{ZZZ}$  between states 1 and 200.

## 11.2 6-311++G(d,p)

### 11.2.1 Plots

Figure S18: For H–C≡C–CF<sub>3</sub> molecule and 6-311++G(d,p) basis set, variation of  $\alpha_{ZZ}$  (top) and  $\beta_{ZZZ}$  (middle) with respect to the number of orbitals (FIOs decomposition presented in this work, in Plots S18a and S18b) or states (SOS approaches, in Plots S18c and S18d). For  $\alpha$  FIOs, three approaches were considered: CPKS, CPHF and UPHF. For  $\beta$  FIOs, the results of CPKS and CPHF approaches are provided. Besides, a shorten range of number of orbitals/states can be seen in Plots S18e and S18f as well (bottom). All elements of the  $\beta$  tensor were recomputed with an error less than 0.20 au in the case of the FIOs. For SOS approach, TDDFT (CAM-B3LYP) and CIS methods were employed. Recomputed values of  $\alpha_{ZZ}$  and  $\beta_{ZZZ}$  for the different approaches are included in each plot. HOMO (H) and LUMO (L) are represented by blue and pink dotted lines, respectively.

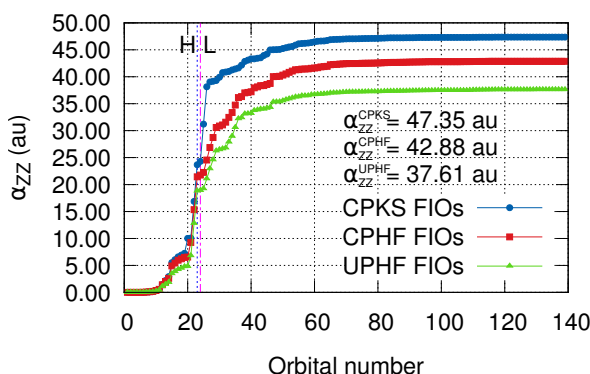

(a) CPKS-, CPHF- and UPHF-FIOs decomposition of  $\alpha_{ZZ}$  into MOs.

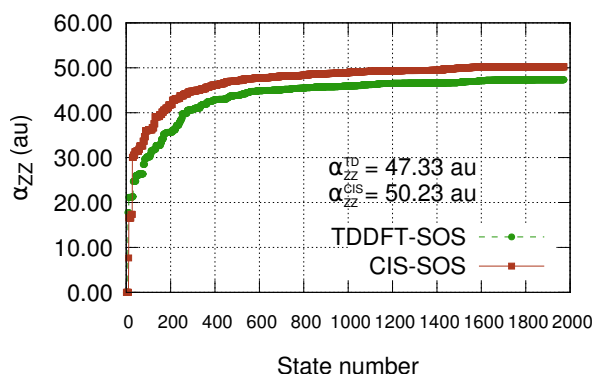

(b) TDDFT- and CIS-SOS decomposition of  $\alpha_{ZZ}$  into states.

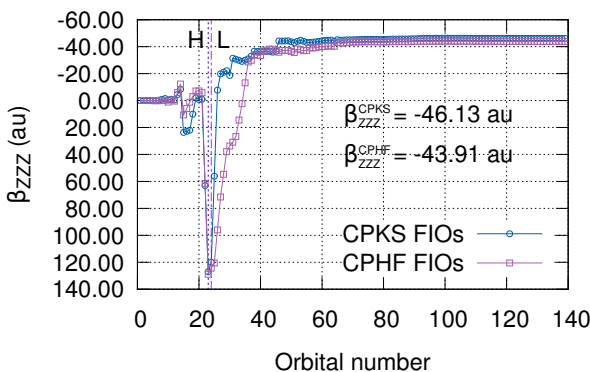

(c) CPKS- and CPHF-FIOs decomposition of  $\beta_{ZZZ}$  into MOs.

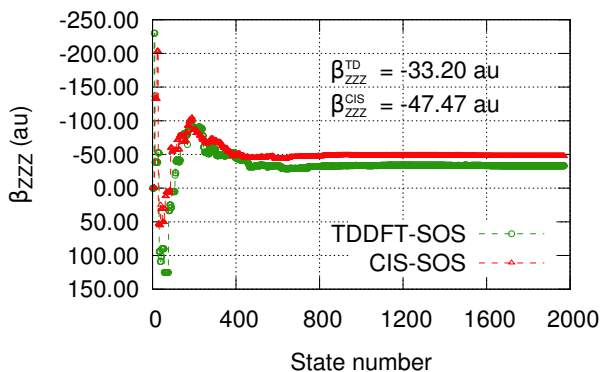

(d) TDDFT- and CIS-SOS decomposition of  $\beta_{ZZZ}$  into states.

Figure S18: (continued) For  $\text{H}-\text{C}\equiv\text{C}-\text{CF}_3$  molecule and 6-311++G(d,p) basis set, variation of  $\alpha_{ZZ}$  (top) and  $\beta_{ZZZ}$  (middle) with respect to the number of orbitals (FIOs decomposition presented in this work, in Plots S18a and S18b) or states (SOS approaches, in Plots S18c and S18d). For  $\alpha$  FIOs, three approaches were considered: CPKS, CPHF and UPHF. For  $\beta$  FIOs, the results of CPKS and CPHF approaches are provided. Besides, a shorten range of number of orbitals/states can be seen in Plots S18e and S18f as well (bottom). All elements of the  $\beta$  tensor were recomputed with an error less than 0.20 au in the case of the FIOs. For SOS approach, TDDFT (CAM-B3LYP) and CIS methods were employed. Recomputed values of  $\alpha_{ZZ}$  and  $\beta_{ZZZ}$  for the different approaches are included in each plot. HOMO (H) and LUMO (L) are represented by blue and pink dotted lines, respectively.

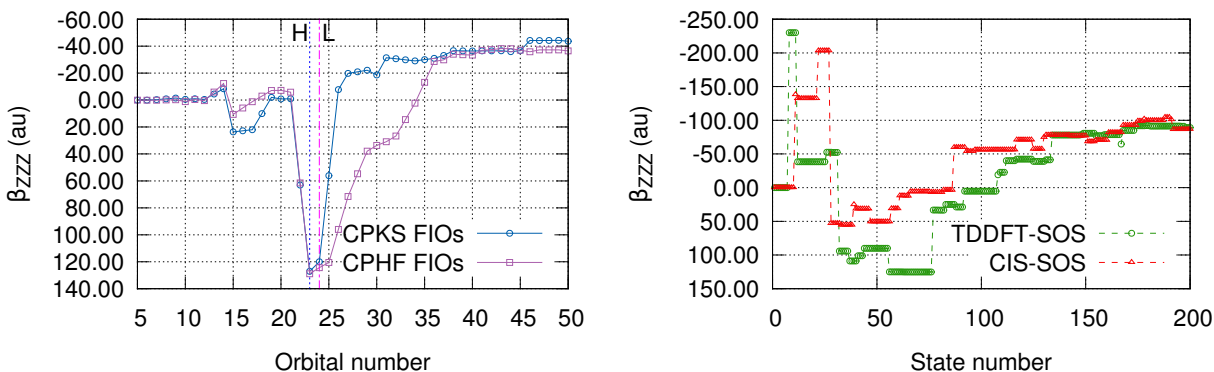

(e) CPKS- and CPHF-FIOs decomposition of  $\beta_{ZZZ}$  between MOs 5 and 50. (f) TDDFT- and CIS-SOS decomposition of  $\beta_{ZZZ}$  between states 1 and 200.

## 12 CN-CC-H

### 12.1 6-311G(d,p)

#### 12.1.1 Plots

Figure S19: For CN-C≡C-H molecule and 6-311G(d,p) basis set, variation of  $\alpha_{ZZ}$  (top) and  $\beta_{ZZZ}$  (middle) with respect to the number of orbitals (FIOs decomposition presented in this work, in Plots S19a and S19b) or states (SOS approaches, in Plots S19c and S19d). For  $\alpha$  FIOs, three approaches were considered: CPKS, CPHF and UPHF. For  $\beta$  FIOs, the results of CPKS and CPHF approaches are provided. Besides, a shorten range of number of orbitals/states can be seen in Plots S19e and S19f as well (bottom). All elements of the  $\beta$  tensor were recomputed with an error less than 0.13 au in the case of the FIOs. For SOS approach, TDDFT (CAM-B3LYP) and CIS methods were employed. Recomputed values of  $\alpha_{ZZ}$  and  $\beta_{ZZZ}$  for the different approaches are included in each plot. HOMO (H) and LUMO (L) are represented by blue and pink dotted lines, respectively.

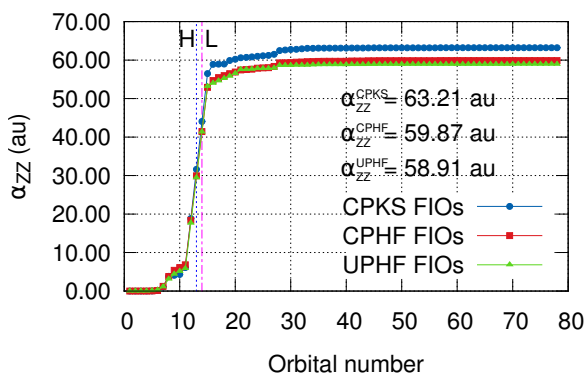

(a) CPKS-, CPHF- and UPHF-FIOs decomposition of  $\alpha_{ZZ}$  into MOs.

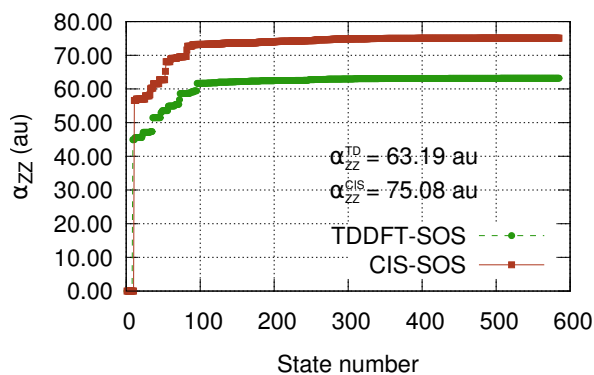

(b) TDDFT- and CIS-SOS decomposition of  $\alpha_{ZZ}$  into states.

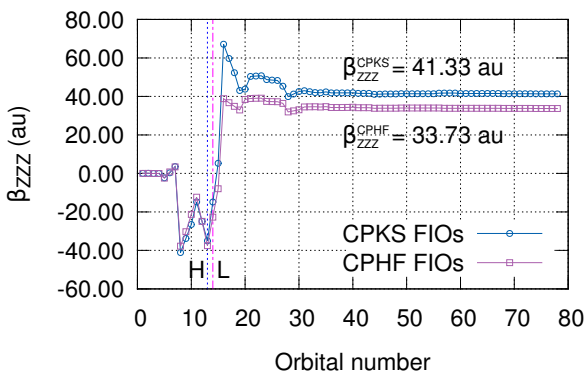

(c) CPKS- and CPHF-FIOs decomposition of  $\beta_{ZZZ}$  into MOs.

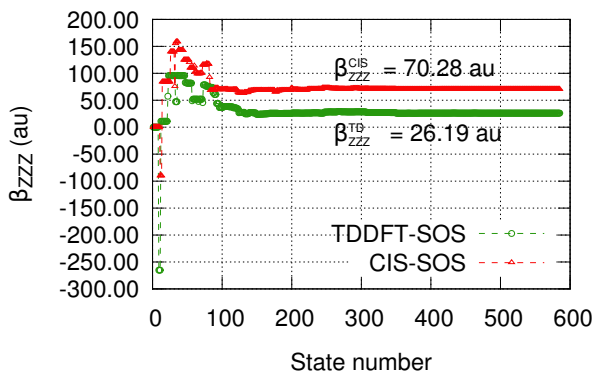

(d) TDDFT- and CIS-SOS decomposition of  $\beta_{ZZZ}$  into states.

Figure S19: (continued) For  $\text{CN}-\text{C}\equiv\text{C}-\text{H}$  molecule and 6-311G(d,p) basis set, variation of  $\alpha_{ZZ}$  (top) and  $\beta_{ZZZ}$  (middle) with respect to the number of orbitals (FIOs decomposition presented in this work, in Plots S19a and S19b) or states (SOS approaches, in Plots S19c and S19d). For  $\alpha$  FIOs, three approaches were considered: CPKS, CPHF and UPHF. For  $\beta$  FIOs, the results of CPKS and CPHF approaches are provided. Besides, a shorten range of number of orbitals/states can be seen in Plots S19e and S19f as well (bottom). All elements of the  $\beta$  tensor were recomputed with an error less than 0.13 au in the case of the FIOs. For SOS approach, TDDFT (CAM-B3LYP) and CIS methods were employed. Recomputed values of  $\alpha_{ZZ}$  and  $\beta_{ZZZ}$  for the different approaches are included in each plot. HOMO (H) and LUMO (L) are represented by blue and pink dotted lines, respectively.

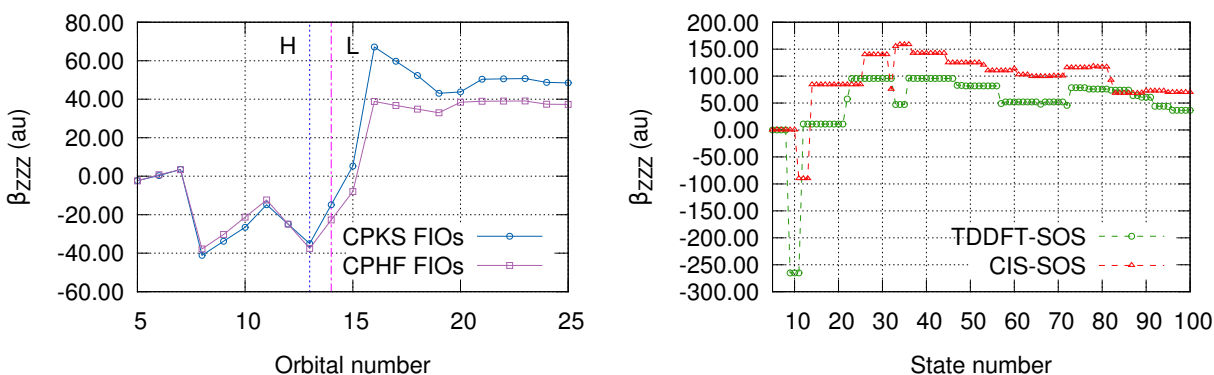

(e) CPKS- and CPHF-FIOs decomposition of  $\beta_{ZZZ}$  between MOs 5 and 25. (f) TDDFT- and CIS-SOS decomposition of  $\beta_{ZZZ}$  between states 5 and 100.



## 12.2 6-311++G(d,p)

### 12.2.1 Plots

Figure S20: For CN-C≡C-H molecule and 6-311++G(d,p) basis set, variation of  $\alpha_{ZZ}$  (top) and  $\beta_{ZZZ}$  (middle) with respect to the number of orbitals (FIOs decomposition presented in this work, in Plots S20a and S20b) or states (SOS approaches, in Plots S20c and S20d). For  $\alpha$  FIOs, three approaches were considered: CPKS, CPHF and UPHF. For  $\beta$  FIOs, the results of CPKS and CPHF approaches are provided. Besides, a shorten range of number of orbitals/states can be seen in Plots S20e and S20f as well (bottom). All elements of the  $\beta$  tensor were recomputed with an error less than 0.13 au in the case of the FIOs. For SOS approach, TDDFT (CAM-B3LYP) and CIS methods were employed. Recomputed values of  $\alpha_{ZZ}$  and  $\beta_{ZZZ}$  for the different approaches are included in each plot. HOMO (H) and LUMO (L) are represented by blue and pink dotted lines, respectively.

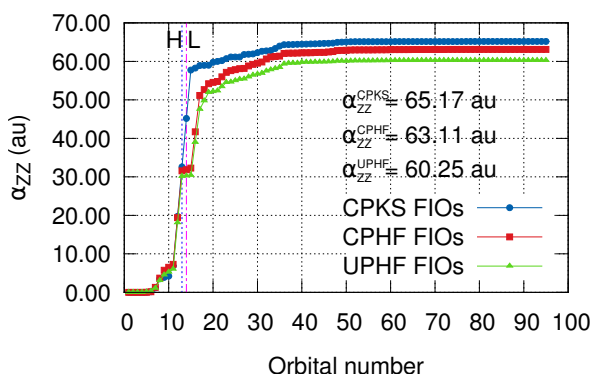

(a) CPKS-, CPHF- and UPHF-FIOs decomposition of  $\alpha_{ZZ}$  into MOs.

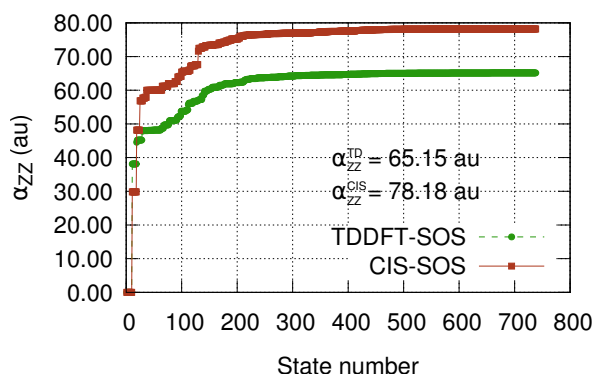

(b) TDDFT- and CIS-SOS decomposition of  $\alpha_{ZZ}$  into states.

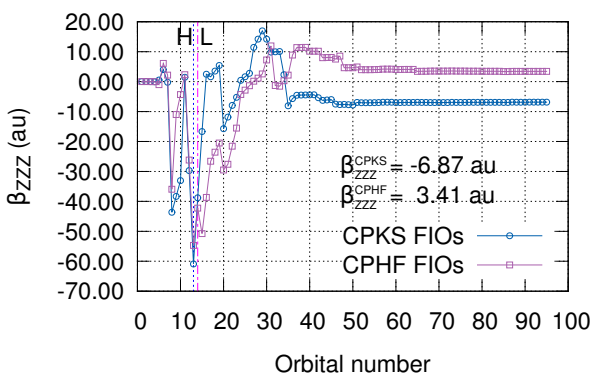

(c) CPKS- and CPHF-FIOs decomposition of  $\beta_{ZZZ}$  into MOs.

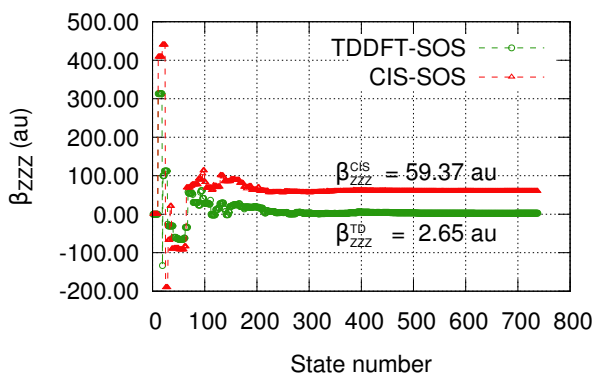

(d) TDDFT- and CIS-SOS decomposition of  $\beta_{ZZZ}$  into states.

Figure S20: (continued) For CN–C≡C–H molecule and 6-311++G(d,p) basis set, variation of  $\alpha_{ZZ}$  (top) and  $\beta_{ZZZ}$  (middle) with respect to the number of orbitals (FIOs decomposition presented in this work, in Plots S20a and S20b) or states (SOS approaches, in Plots S20c and S20d). For  $\alpha$  FIOs, three approaches were considered: CPKS, CPHF and UPHF. For  $\beta$  FIOs, the results of CPKS and CPHF approaches are provided. Besides, a shorten range of number of orbitals/states can be seen in Plots S20e and S20f as well (bottom). All elements of the  $\beta$  tensor were recomputed with an error less than 0.13 au in the case of the FIOs. For SOS approach, TDDFT (CAM-B3LYP) and CIS methods were employed. Recomputed values of  $\alpha_{ZZ}$  and  $\beta_{ZZZ}$  for the different approaches are included in each plot. HOMO (H) and LUMO (L) are represented by blue and pink dotted lines, respectively.

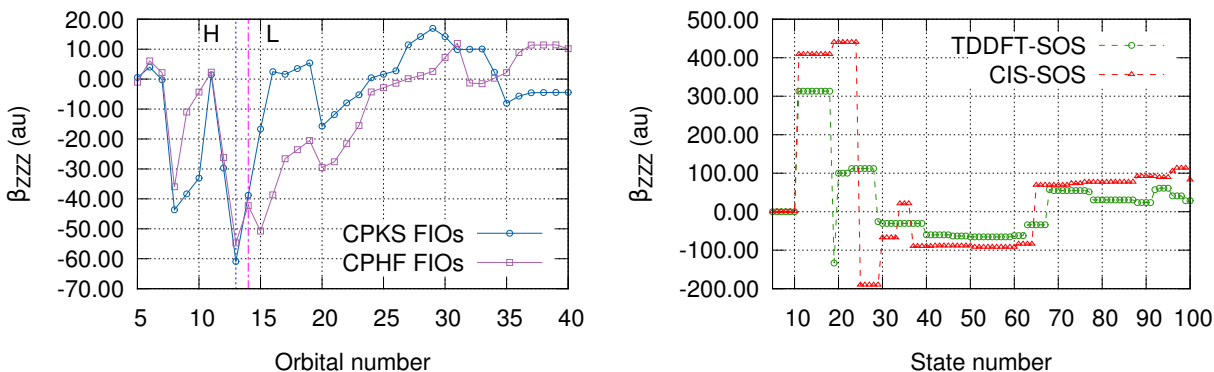

(e) CPKS- and CPHF-FIOs decomposition of  $\beta_{ZZZ}$  between MOs 5 and 40. (f) TDDFT- and CIS-SOS decomposition of  $\beta_{ZZZ}$  between states 5 and 100.

# 13 CN-CC-CC-H

## 13.1 6-311G(d,p)

### 13.1.1 Plots

Figure S21: For CN-C≡C-C≡C-H molecule and 6-311G(d,p) basis set, variation of  $\alpha_{ZZ}$  (top) and  $\beta_{ZZZ}$  (middle) with respect to the number of orbitals (FIOs decomposition presented in this work, in Plots S21a and S21b) or states (SOS approaches, in Plots S21c and S21d). For  $\alpha$  FIOs, three approaches were considered: CPKS, CPHF and UPHF. For  $\beta$  FIOs, the results of CPKS and CPHF approaches are provided. Besides, a shorten range of number of orbitals/states can be seen in Plots S21e and S21f as well (bottom). All elements of the  $\beta$  tensor were recomputed with an error less than 0.12 au in the case of the FIOs. For SOS approach, TDDFT (CAM-B3LYP) and CIS methods were employed. Recomputed values of  $\alpha_{ZZ}$  and  $\beta_{ZZZ}$  for the different approaches are included in each plot. HOMO (H) and LUMO (L) are represented by blue and pink dotted lines, respectively.

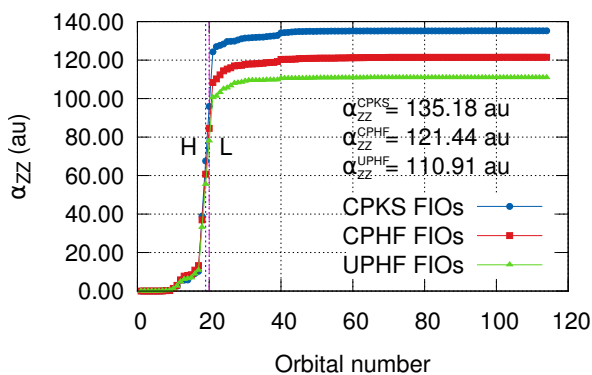

(a) CPKS-, CPHF- and UPHF-FIOs decomposition of  $\alpha_{ZZ}$  into MOs.

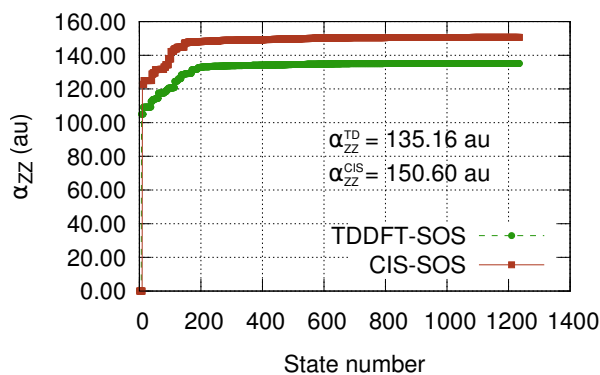

(b) TDDFT- and CIS-SOS decomposition of  $\alpha_{ZZ}$  into states.

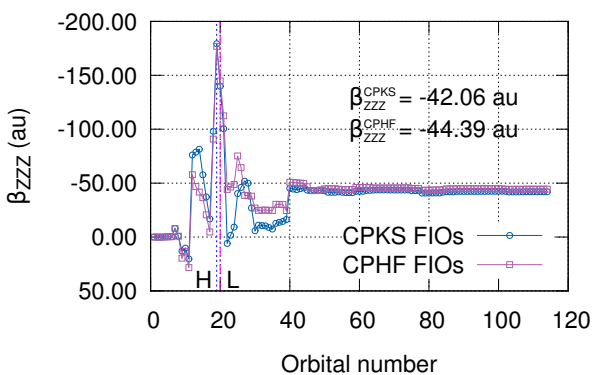

(c) CPKS- and CPHF-FIOs decomposition of  $\beta_{ZZZ}$  into MOs.

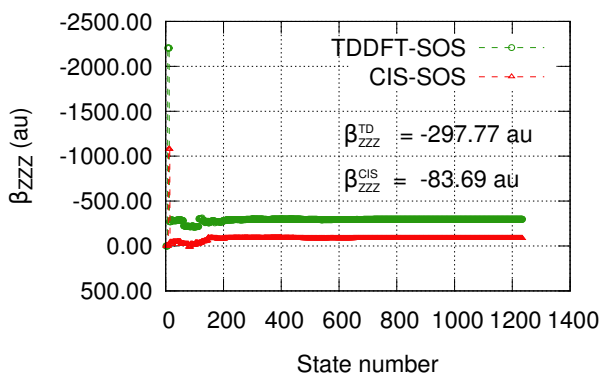

(d) TDDFT- and CIS-SOS decomposition of  $\beta_{ZZZ}$  into states.

Figure S21: (continued) For  $\text{CN}-\text{C}\equiv\text{C}-\text{C}\equiv\text{C}-\text{H}$  molecule and 6-311G(d,p) basis set, variation of  $\alpha_{ZZ}$  (top) and  $\beta_{ZZZ}$  (middle) with respect to the number of orbitals (FIOs decomposition presented in this work, in Plots S21a and S21b) or states (SOS approaches, in Plots S21c and S21d). For  $\alpha$  FIOs, three approaches were considered: CPKS, CPHF and UPHF. For  $\beta$  FIOs, the results of CPKS and CPHF approaches are provided. Besides, a shorten range of number of orbitals/states can be seen in Plots S21e and S21f as well (bottom). All elements of the  $\beta$  tensor were recomputed with an error less than 0.12 au in the case of the FIOs. For SOS approach, TDDFT (CAM-B3LYP) and CIS methods were employed. Recomputed values of  $\alpha_{ZZ}$  and  $\beta_{ZZZ}$  for the different approaches are included in each plot. HOMO (H) and LUMO (L) are represented by blue and pink dotted lines, respectively.

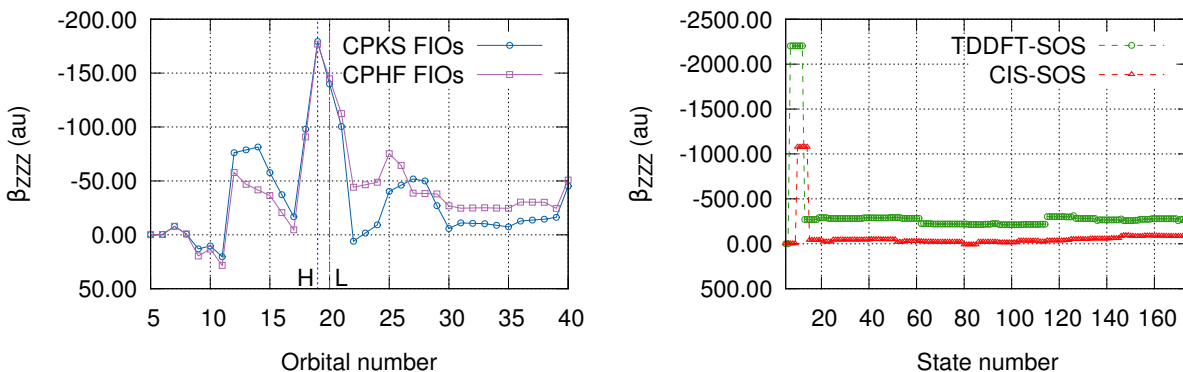

(e) CPKS- and CPHF-FIOs decomposition of  $\beta_{ZZZ}$  between MOs 5 and 40. (f) TDDFT- and CIS-SOS decomposition of  $\beta_{ZZZ}$  between states 5 and 175.

## 13.2 6-311++G(d,p)

### 13.2.1 Plots

Figure S22: For CN-C≡C-C≡C-H molecule and 6-311++G(d,p) basis set, variation of  $\alpha_{ZZ}$  (top) and  $\beta_{ZZZ}$  (middle) with respect to the number of orbitals (FIOs decomposition presented in this work, in Plots S22a and S22b) or states (SOS approaches, in Plots S22c and S22d). For  $\alpha$  FIOs, three approaches were considered: CPKS, CPHF and UPHF. For  $\beta$  FIOs, the results of CPKS and CPHF approaches are provided. Besides, a shorten range of number of orbitals/states can be seen in Plots S22e and S22f as well (bottom). All elements of the  $\beta$  tensor were recomputed with an error less than 0.24 au in the case of the FIOs. For SOS approach, TDDFT (CAM-B3LYP) and CIS methods were employed. Recomputed values of  $\alpha_{ZZ}$  and  $\beta_{ZZZ}$  for the different approaches are included in each plot. HOMO (H) and LUMO (L) are represented by blue and pink dotted lines, respectively.

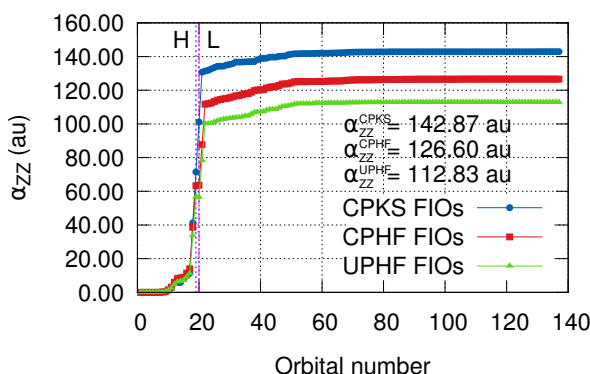

(a) CPKS-, CPHF- and UPHF-FIOs decomposition of  $\alpha_{ZZ}$  into MOs.

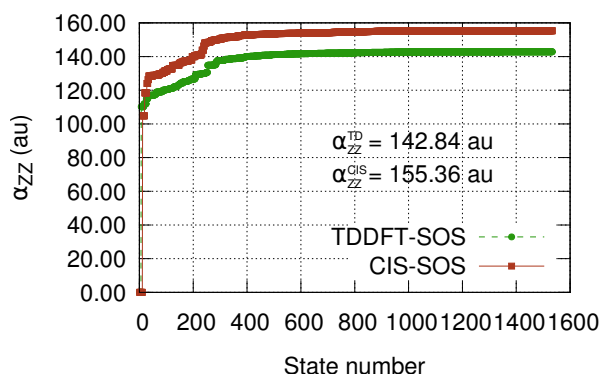

(b) TDDFT- and CIS-SOS decomposition of  $\alpha_{ZZ}$  into states.

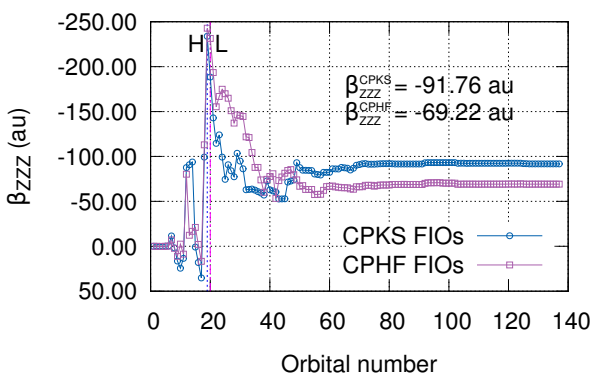

(c) CPKS- and CPHF-FIOs decomposition of  $\beta_{ZZZ}$  into MOs.

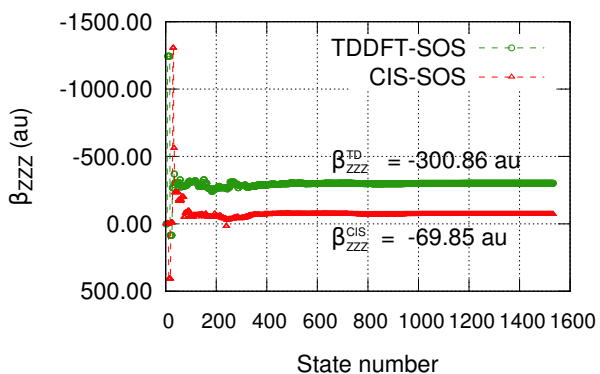

(d) TDDFT- and CIS-SOS decomposition of  $\beta_{ZZZ}$  into states.

Figure S22: (continued) For  $\text{CN}-\text{C}\equiv\text{C}-\text{C}\equiv\text{C}-\text{H}$  molecule and 6-311++G(d,p) basis set, variation of  $\alpha_{ZZ}$  (top) and  $\beta_{ZZZ}$  (middle) with respect to the number of orbitals (FIOs decomposition presented in this work, in Plots S22a and S22b) or states (SOS approaches, in Plots S22c and S22d). For  $\alpha$  FIOs, three approaches were considered: CPKS, CPHF and UPHF. For  $\beta$  FIOs, the results of CPKS and CPHF approaches are provided. Besides, a shorten range of number of orbitals/states can be seen in Plots S22e and S22f as well (bottom). All elements of the  $\beta$  tensor were recomputed with an error less than 0.24 au in the case of the FIOs. For SOS approach, TDDFT (CAM-B3LYP) and CIS methods were employed. Recomputed values of  $\alpha_{ZZ}$  and  $\beta_{ZZZ}$  for the different approaches are included in each plot. HOMO (H) and LUMO (L) are represented by blue and pink dotted lines, respectively.

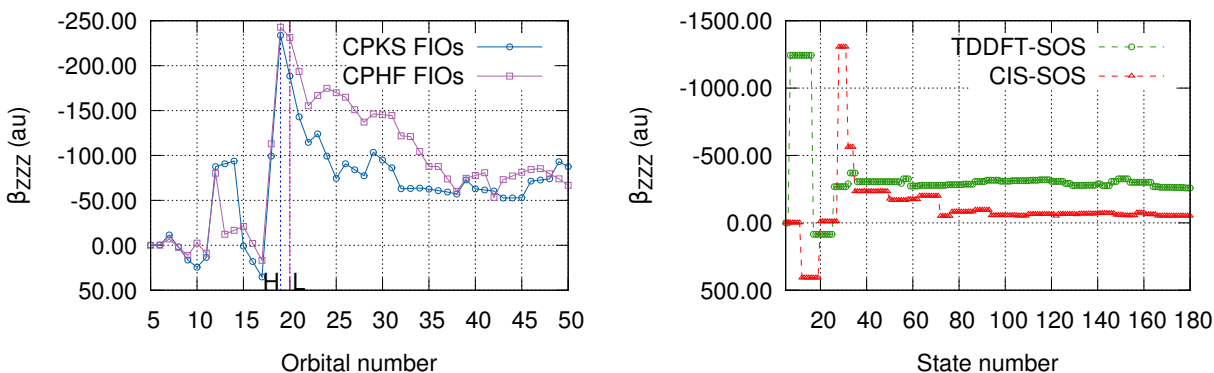

(e) CPKS- and CPHF-FIOs decomposition of (f) TDDFT- and CIS-SOS decomposition of  $\beta_{ZZZ}$  between MOs 5 and 40.  $\beta_{ZZZ}$  between states 5 and 175.

# 14 CN-CC-CC-CC-H

## 14.1 6-311G(d,p)

### 14.1.1 Plots

Figure S23: For CN-C≡C-C≡C-C≡C-H molecule and 6-311G(d,p) basis set, variation of  $\alpha_{ZZ}$  (top) and  $\beta_{ZZZ}$  (middle) with respect to the number of orbitals (FIOs decomposition presented in this work, in Plots S23a and S23b) or states (SOS approaches, in Plots S23c and S23d). For  $\alpha$  FIOs, three approaches were considered: CPKS, CPHF and UPHF. For  $\beta$  FIOs, the results of CPKS and CPHF approaches are provided. Besides, a shorten range of number of orbitals/states can be seen in Plots S23e and S23f as well (bottom). All elements of the  $\beta$  tensor were recomputed with an error less than 0.41 au in the case of the FIOs. For SOS approach, TDDFT (CAM-B3LYP) and CIS methods were employed. Recomputed values of  $\alpha_{ZZ}$  and  $\beta_{ZZZ}$  for the different approaches are included in each plot. HOMO (H) and LUMO (L) are represented by blue and pink dotted lines, respectively.

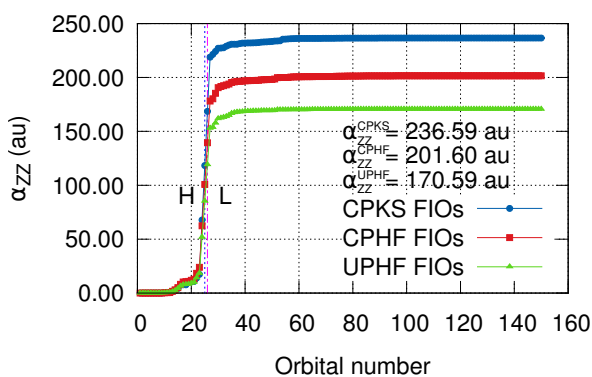

(a) CPKS-, CPHF- and UPHF-FIOs decomposition of  $\alpha_{ZZ}$  into MOs.

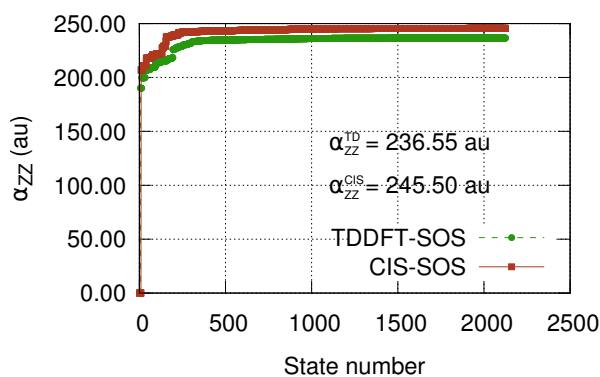

(b) TDDFT- and CIS-SOS decomposition of  $\alpha_{ZZ}$  into states.

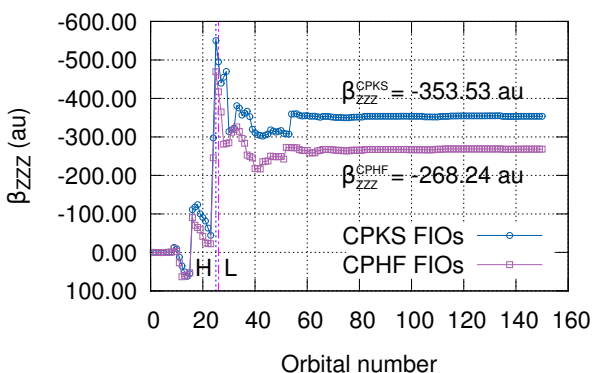

(c) CPKS- and CPHF-FIOs decomposition of  $\beta_{ZZZ}$  into MOs.

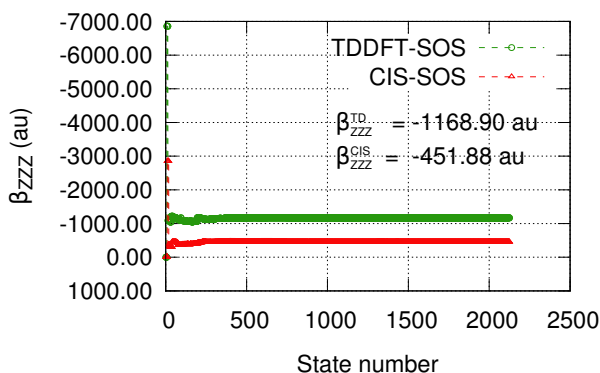

(d) TDDFT- and CIS-SOS decomposition of  $\beta_{ZZZ}$  into states.

Figure S23: (continued) For  $\text{CN}-\text{C}\equiv\text{C}-\text{C}\equiv\text{C}-\text{C}\equiv\text{C}-\text{H}$  molecule and 6-311G(d,p) basis set, variation of  $\alpha_{ZZ}$  (top) and  $\beta_{ZZZ}$  (middle) with respect to the number of orbitals (FIOs decomposition presented in this work, in Plots S23a and S23b) or states (SOS approaches, in Plots S23c and S23d). For  $\alpha$  FIOs, three approaches were considered: CPKS, CPHF and UPHF. For  $\beta$  FIOs, the results of CPKS and CPHF approaches are provided. Besides, a shorten range of number of orbitals/states can be seen in Plots S23e and S23f as well (bottom). All elements of the  $\beta$  tensor were recomputed with an error less than 0.41 au in the case of the FIOs. For SOS approach, TDDFT (CAM-B3LYP) and CIS methods were employed. Recomputed values of  $\alpha_{ZZ}$  and  $\beta_{ZZZ}$  for the different approaches are included in each plot. HOMO (H) and LUMO (L) are represented by blue and pink dotted lines, respectively.

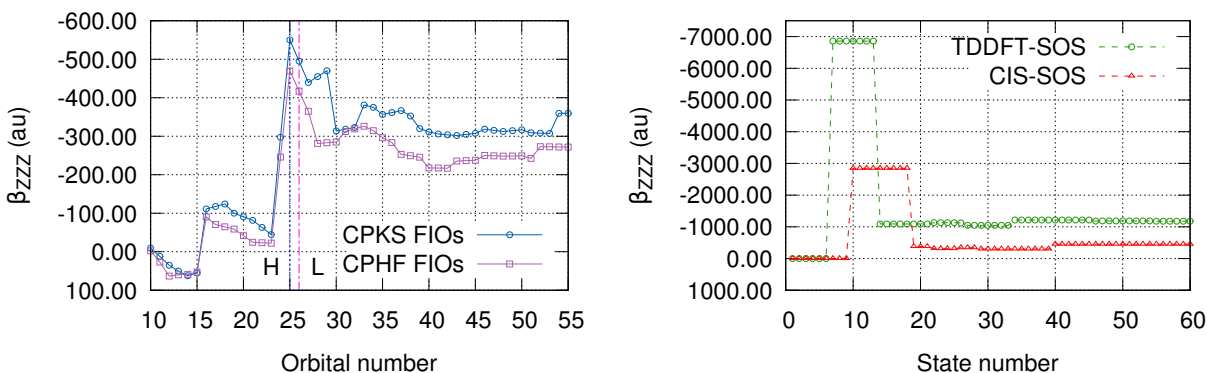

(e) CPKS- and CPHF-FIOs decomposition of (f) TDDFT- and CIS-SOS decomposition of  $\beta_{ZZZ}$  between MOs 10 and 55.  $\beta_{ZZZ}$  between states 1 and 60.



## 14.2 6-311++G(d,p)

### 14.2.1 Plots

Figure S24: For CN-C≡C-C≡C-C≡C-H molecule and 6-311++G(d,p) basis set, variation of  $\alpha_{ZZ}$  (top) and  $\beta_{ZZZ}$  (middle) with respect to the number of orbitals (FIOs decomposition presented in this work, in Plots S24a and S24b) or states (SOS approaches, in Plots S24c and S24d). For  $\alpha$  FIOs, three approaches were considered: CPKS, CPHF and UPHF. For  $\beta$  FIOs, the results of CPKS and CPHF approaches are provided. Besides, a shorten range of number of orbitals/states can be seen in Plots S24e and S24f as well (bottom). All elements of the  $\beta$  tensor were recomputed with an error less than 0.21 au in the case of the FIOs. For SOS approach, TDDFT (CAM-B3LYP) and CIS methods were employed. Recomputed values of  $\alpha_{ZZ}$  and  $\beta_{ZZZ}$  for the different approaches are included in each plot. HOMO (H) and LUMO (L) are represented by blue and pink dotted lines, respectively.

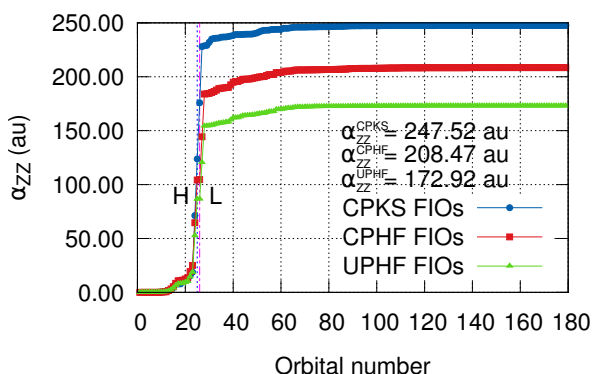

(a) CPKS-, CPHF- and UPHF-FIOs decomposition of  $\alpha_{ZZ}$  into MOs.

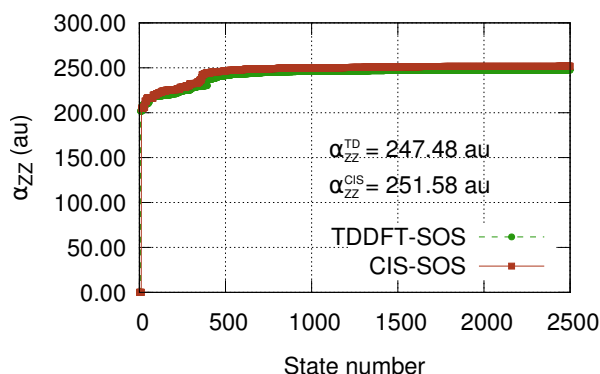

(b) TDDFT- and CIS-SOS decomposition of  $\alpha_{ZZ}$  into states.

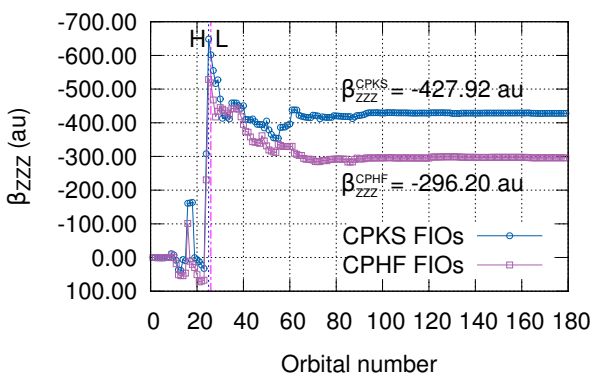

(c) CPKS- and CPHF-FIOs decomposition of  $\beta_{ZZZ}$  into MOs.

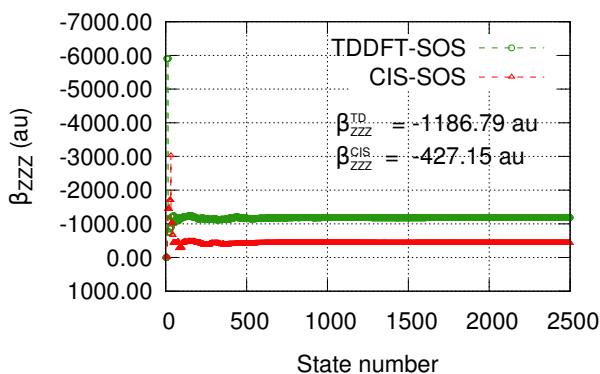

(d) TDDFT- and CIS-SOS decomposition of  $\beta_{ZZZ}$  into states.

Figure S24: (continued) For  $\text{CN}-\text{C}\equiv\text{C}-\text{C}\equiv\text{C}-\text{C}\equiv\text{C}-\text{H}$  molecule and 6-311++G(d,p) basis set, variation of  $\alpha_{ZZ}$  (top) and  $\beta_{ZZZ}$  (middle) with respect to the number of orbitals (FIOs decomposition presented in this work, in Plots S24a and S24b) or states (SOS approaches, in Plots S24c and S24d). For  $\alpha$  FIOs, three approaches were considered: CPKS, CPHF and UPHF. For  $\beta$  FIOs, the results of CPKS and CPHF approaches are provided. Besides, a shorten range of number of orbitals/states can be seen in Plots S24e and S24f as well (bottom). All elements of the  $\beta$  tensor were recomputed with an error less than 0.21 au in the case of the FIOs. For SOS approach, TDDFT (CAM-B3LYP) and CIS methods were employed. Recomputed values of  $\alpha_{ZZ}$  and  $\beta_{ZZZ}$  for the different approaches are included in each plot. HOMO (H) and LUMO (L) are represented by blue and pink dotted lines, respectively.

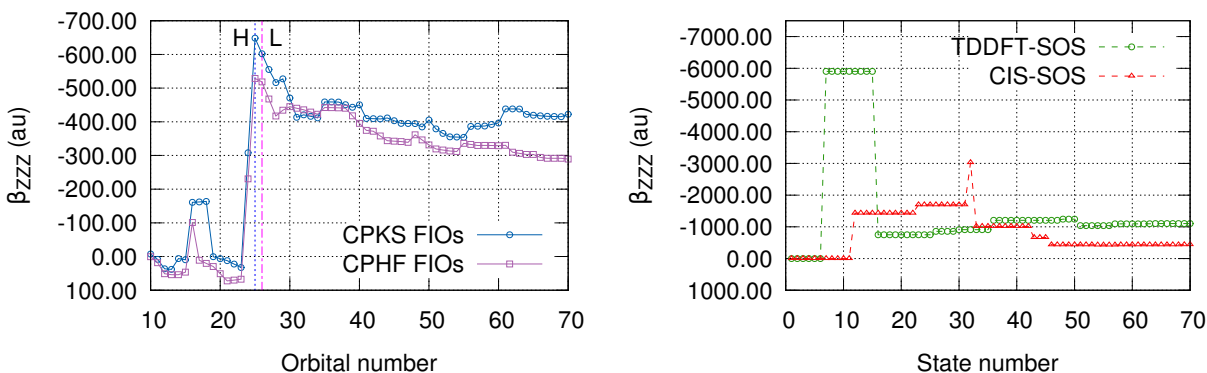

(e) CPKS- and CPHF-FIOs decomposition of  $\beta_{ZZZ}$  between MOs 10 and 70. (f) TDDFT- and CIS-SOS decomposition of  $\beta_{ZZZ}$  between states 1 and 70.

# 15 *p*-cyanoaniline

## 15.1 6-311G(d,p)

### 15.1.1 Plots

Figure S25: For *p*-cyanoaniline molecule and 6-311G(d,p) basis set, variation of  $\alpha_{ZZ}$  (top) and  $\beta_{ZZZ}$  (middle) with respect to the number of orbitals (FIOs decomposition presented in this work, in Plots S25a and S25b) or states (SOS approaches, in Plots S25c and S25d). For  $\alpha$  FIOs, three approaches were considered: CPKS, CPHF and UPHF. For  $\beta$  FIOs, the results of CPKS and CPHF approaches are provided. Besides, a shorten range of number of orbitals/states can be seen in Plots S25d and S25f as well (bottom). All elements of the  $\beta$  tensor were recomputed with an error less than 0.11 au in the case of the FIOs. For SOS approach, TDDFT (CAM-B3LYP) and CIS methods were employed. Recomputed values of  $\alpha_{ZZ}$  and  $\beta_{ZZZ}$  for the different approaches are included in each plot. HOMO (H) and LUMO (L) are represented by blue and pink dotted lines, respectively.

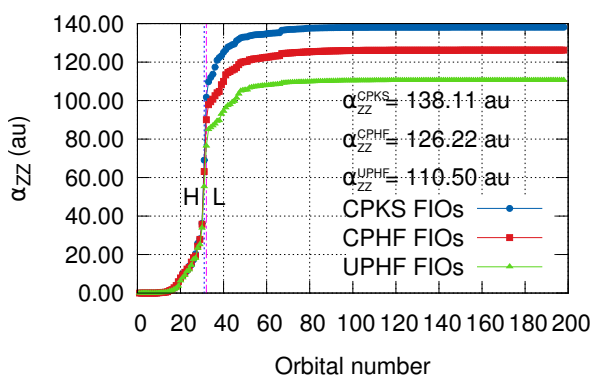

(a) CPKS-, CPHF- and UPHF-FIOs decomposition of  $\alpha_{ZZ}$  into MOs.

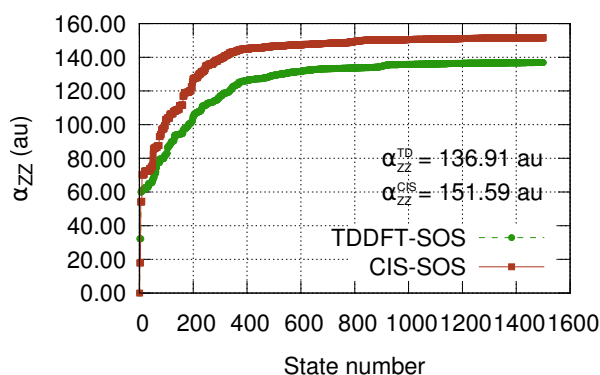

(b) TDDFT- and CIS-SOS decomposition of  $\alpha_{ZZ}$  into states.

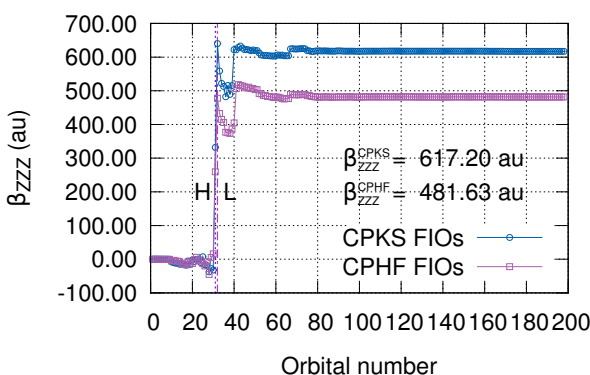

(c) CPKS- and CPHF-FIOs decomposition of  $\beta_{ZZZ}$  into MOs.

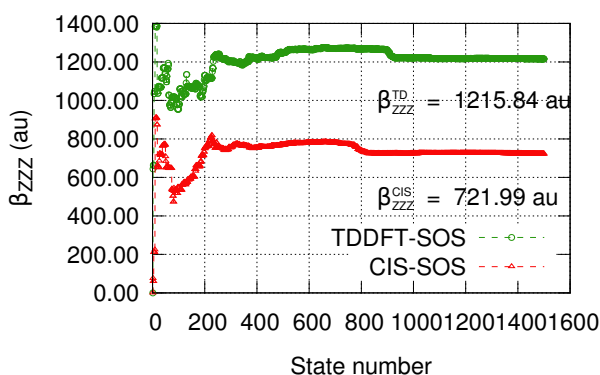

(d) TDDFT- and CIS-SOS decomposition of  $\beta_{ZZZ}$  into states.

Figure S25: (continued) For *p*-cyanoaniline molecule and 6-311G(d,p) basis set, variation of  $\alpha_{ZZ}$  (top) and  $\beta_{ZZZ}$  (middle) with respect to the number of orbitals (FIOs decomposition presented in this work, in Plots S25a and S25b) or states (SOS approaches, in Plots S25c and S25d). For  $\alpha$  FIOs, three approaches were considered: CPKS, CPHF and UPHF. For  $\beta$  FIOs, the results of CPKS and CPHF approaches are provided. Besides, a shorten range of number of orbitals/states can be seen in Plots S25d and S25f as well (bottom). All elements of the  $\beta$  tensor were recomputed with an error less than 0.11 au in the case of the FIOs. For SOS approach, TDDFT (CAM-B3LYP) and CIS methods were employed. Recomputed values of  $\alpha_{ZZ}$  and  $\beta_{ZZZ}$  for the different approaches are included in each plot. HOMO (H) and LUMO (L) are represented by blue and pink dotted lines, respectively.

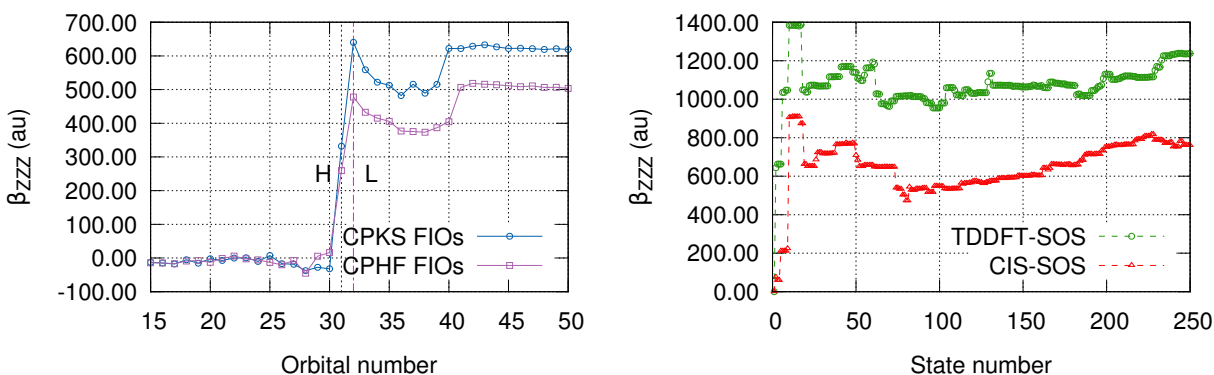

(e) CPKS- and CPHF-FIOs decomposition of  $\beta_{ZZZ}$  between MOs 15 and 50. (f) TDDFT- and CIS-SOS decomposition of  $\beta_{ZZZ}$  between states 1 and 250.

## 15.2 6-311++G(d,p)

### 15.2.1 Plots

Figure S26: For *p*-cyanoaniline molecule and 6-311++G(d,p) basis set, variation of  $\alpha_{ZZ}$  (top) and  $\beta_{ZZZ}$  (middle) with respect to the number of orbitals (FIOs decomposition presented in this work, in Plots S26a and S26b) or states (SOS approaches, in Plots S26c and S26d). For  $\alpha$  FIOs, three approaches were considered: CPKS, CPHF and UPHF. For  $\beta$  FIOs, the results of CPKS and CPHF approaches are provided. Besides, a shorten range of number of orbitals/states can be seen in Plots S26d and S26f as well (bottom). All elements of the  $\beta$  tensor were recomputed with an error less than 0.11 au in the case of the FIOs. For SOS approach, TDDFT (CAM-B3LYP) and CIS methods were employed. Recomputed values of  $\alpha_{ZZ}$  and  $\beta_{ZZZ}$  for the different approaches are included in each plot. HOMO (H) and LUMO (L) are represented by blue and pink dotted lines, respectively.

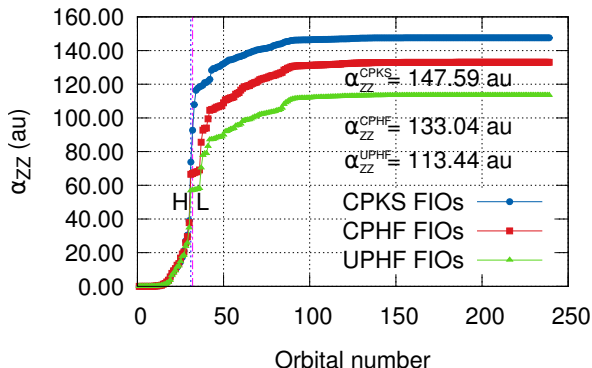

(a) CPKS-, CPHF- and UPHF-FIOs decomposition of  $\alpha_{ZZ}$  into MOs.

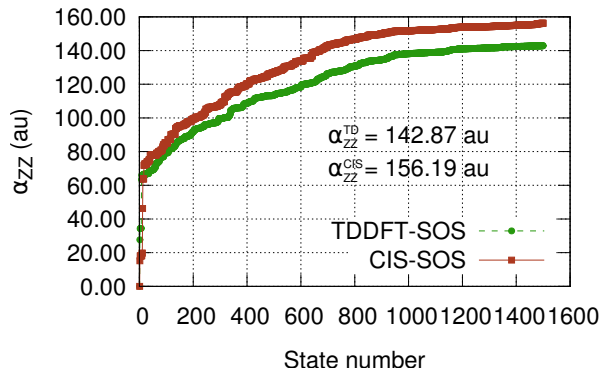

(b) TDDFT- and CIS-SOS decomposition of  $\alpha_{ZZ}$  into states.

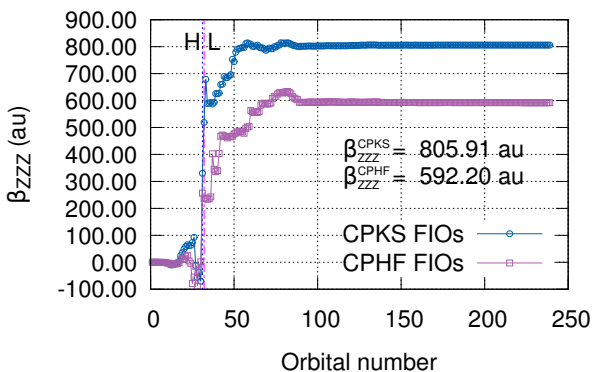

(c) CPKS- and CPHF-FIOs decomposition of  $\beta_{ZZZ}$  into MOs.

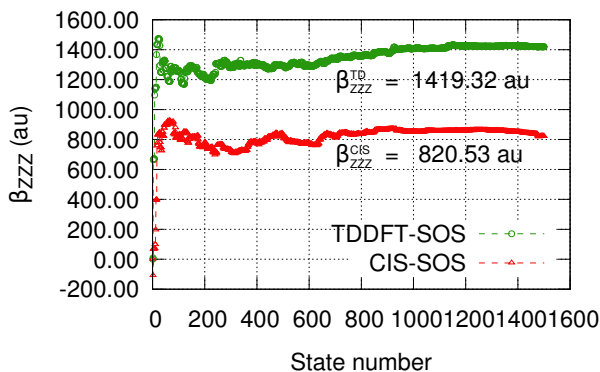

(d) TDDFT- and CIS-SOS decomposition of  $\beta_{ZZZ}$  into states.

Figure S26: (continued) For *p*-cyanoaniline molecule and 6-311++G(d,p) basis set, variation of  $\alpha_{ZZ}$  (top) and  $\beta_{ZZZ}$  (middle) with respect to the number of orbitals (FIOs decomposition presented in this work, in Plots S26a and S26b) or states (SOS approaches, in Plots S26c and S26d). For  $\alpha$  FIOs, three approaches were considered: CPKS, CPHF and UPHF. For  $\beta$  FIOs, the results of CPKS and CPHF approaches are provided. Besides, a shorten range of number of orbitals/states can be seen in Plots S26d and S26f as well (bottom). All elements of the  $\beta$  tensor were recomputed with an error less than 0.11 au in the case of the FIOs. For SOS approach, TDDFT (CAM-B3LYP) and CIS methods were employed. Recomputed values of  $\alpha_{ZZ}$  and  $\beta_{ZZZ}$  for the different approaches are included in each plot. HOMO (H) and LUMO (L) are represented by blue and pink dotted lines, respectively.

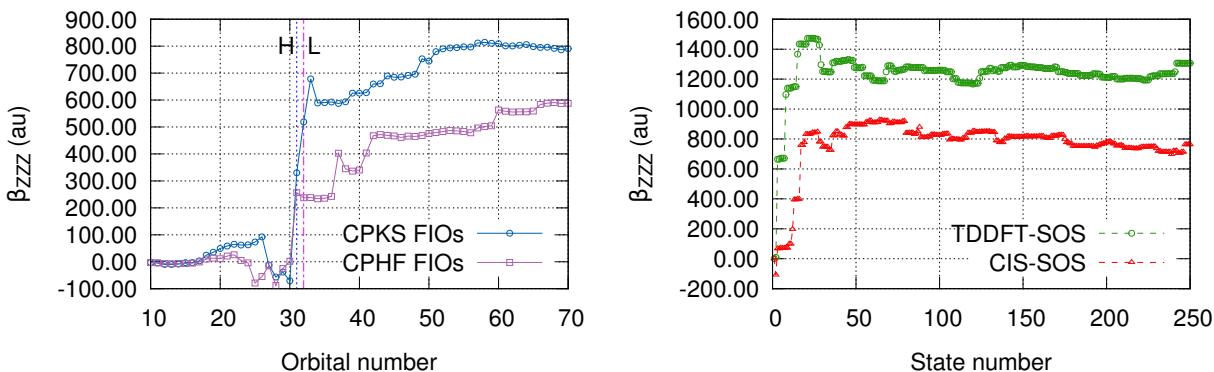

(e) CPKS- and CPHF-FIOs decomposition of  $\beta_{ZZZ}$  between MOs 15 and 50. (f) TDDFT- and CIS-SOS decomposition of  $\beta_{ZZZ}$  between states 1 and 250.

# 16 *p*-nitroaniline

## 16.1 6-311G(d,p)

### 16.1.1 Plots

Figure S27: For *p*-nitroaniline molecule and 6-311G(d,p) basis set, variation of  $\alpha_{ZZ}$  (top) and  $\beta_{ZZZ}$  (middle) with respect to the number of orbitals (FIOs decomposition presented in this work, in Plots S27a and S27b) or states (SOS approaches, in Plots S27c and S27d). For  $\alpha$  FIOs, three approaches were considered: CPKS, CPHF and UPHF. For  $\beta$  FIOs, the results of CPKS and CPHF approaches are provided. Besides, a shorten range of number of orbitals/states can be seen in Plots S27e and S27f as well (bottom). All elements of the  $\beta$  tensor were recomputed with an error less than 0.37 au in the case of the FIOs. For SOS approach, TDDFT (CAM-B3LYP) and CIS methods were employed. Recomputed values of  $\alpha_{ZZ}$  and  $\beta_{ZZZ}$  for the different approaches are included in each plot. HOMO (H) and LUMO (L) are represented by blue and pink dotted lines, respectively.

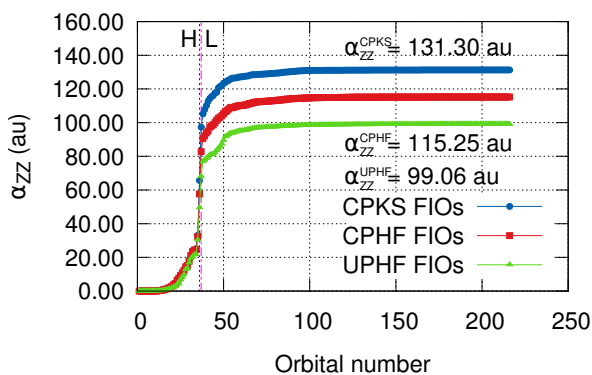

(a) CPKS-, CPHF- and UPHF-FIOs decomposition of  $\alpha_{ZZ}$  into MOs.

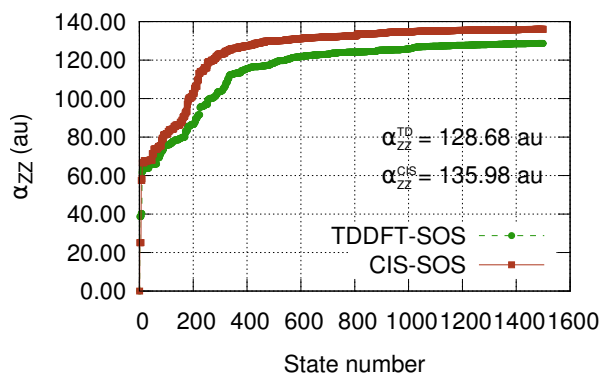

(b) TDDFT- and CIS-SOS decomposition of  $\alpha_{ZZ}$  into states.

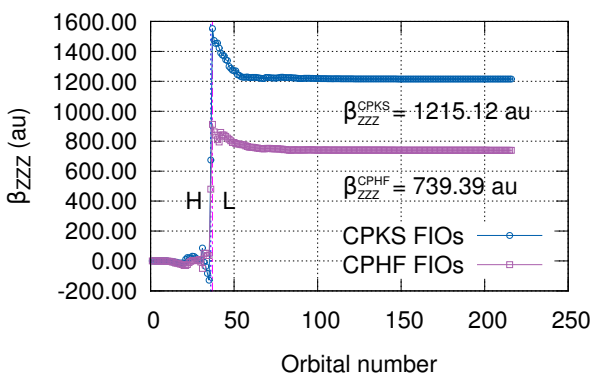

(c) CPKS- and CPHF-FIOs decomposition of  $\beta_{ZZZ}$  into MOs.

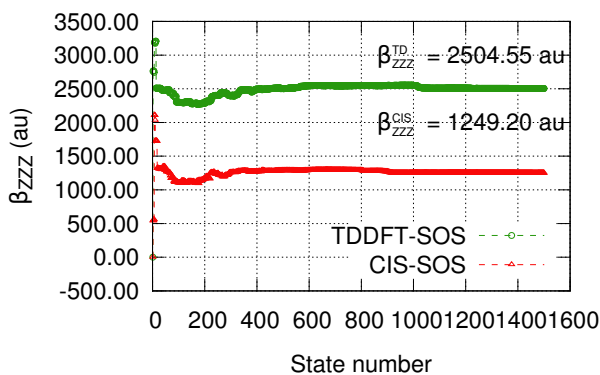

(d) TDDFT- and CIS-SOS decomposition of  $\beta_{ZZZ}$  into states.

Figure S27: (continued) For *p*-nitroaniline molecule and 6-311G(d,p) basis set, variation of  $\alpha_{ZZ}$  (top) and  $\beta_{ZZZ}$  (middle) with respect to the number of orbitals (FIOs decomposition presented in this work, in Plots S27a and S27b) or states (SOS approaches, in Plots S27c and S27d). For  $\alpha$  FIOs, three approaches were considered: CPKS, CPHF and UPHF. For  $\beta$  FIOs, the results of CPKS and CPHF approaches are provided. Besides, a shorten range of number of orbitals/states can be seen in Plots S27e and S27f as well (bottom). All elements of the  $\beta$  tensor were recomputed with an error less than 0.37 au in the case of the FIOs. For SOS approach, TDDFT (CAM-B3LYP) and CIS methods were employed. Recomputed values of  $\alpha_{ZZ}$  and  $\beta_{ZZZ}$  for the different approaches are included in each plot. HOMO (H) and LUMO (L) are represented by blue and pink dotted lines, respectively.

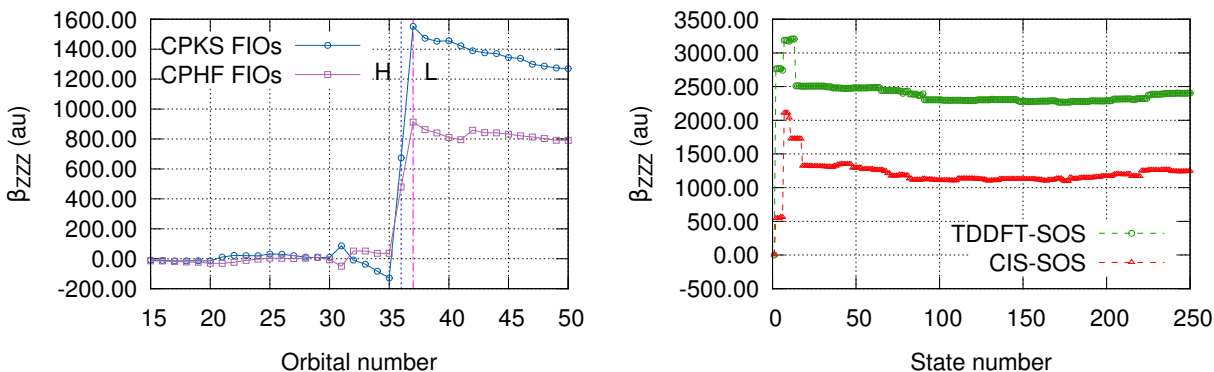

(e) CPKS- and CPHF-FIOs decomposition of  $\beta_{ZZZ}$  between MOs 15 and 50. (f) TDDFT- and CIS-SOS decomposition of  $\beta_{ZZZ}$  between states 1 and 250.

### 16.1.2 Main contributions from different excited states at TDDFT (CAM-B3LYP) approach

| #_exc.st | ___symm___ | Exc.E  | Osc._Strength | ___f___ | <S**2> |            |                                   |        |          |       |
|----------|------------|--------|---------------|---------|--------|------------|-----------------------------------|--------|----------|-------|
|          |            |        |               |         | 2      | Singlet-A' | 4.5920                            | 270.00 | 0.3670   | 0.000 |
| 1        | Singlet-A" | 4.1147 | 301.32        | 0.0000  | 0.000  | max(1)=    | 36 -> 37                          |        | 0.68965  |       |
|          |            |        |               |         |        | max(2)=    | 35 -> 38                          |        | 0.10043  |       |
|          |            |        |               |         |        | max(3)=    | 31 -> 40                          |        | 0.04187  |       |
|          |            |        |               |         |        | max(4)=    | 31 -> 39                          |        | 0.03005  |       |
|          |            |        |               |         |        | max(5)=    | 29 -> 37                          |        | 0.01343  |       |
|          |            |        |               |         |        | min(1)=    | 31 -> 37                          |        | -0.09692 |       |
|          |            |        |               |         |        | min(2)=    | 30 -> 50                          |        | -0.02180 |       |
|          |            |        |               |         |        | min(3)=    | 32 -> 47                          |        | -0.01837 |       |
|          |            |        |               |         |        | min(4)=    | 32 -> 37                          |        | -0.01730 |       |
|          |            |        |               |         |        | min(5)=    | 34 -> 45                          |        | -0.01695 |       |
|          |            |        |               |         |        |            | #CIs=2384 #CIs>0=1051 #CIs<0=1061 |        |          |       |
|          |            |        |               |         |        |            | #CIs=2195 #CIs>0=781 #CIs<0=803   |        |          |       |



|   |            |                                  |        |          |       |            |                                   |          |              |
|---|------------|----------------------------------|--------|----------|-------|------------|-----------------------------------|----------|--------------|
| 3 | Singlet-A' | 4.6429                           | 267.04 | 0.0004   | 0.000 | max(2)=    | 31 -> 39                          | 0.11595  |              |
|   | max(1)=    | 32 -> 37                         |        | 0.67546  |       | max(3)=    | 35 -> 38                          | 0.05525  |              |
|   | max(2)=    | 25 -> 37                         |        | 0.02320  |       | max(4)=    | 31 -> 37                          | 0.03750  |              |
|   | max(3)=    | 28 -> 37                         |        | 0.01979  |       | max(5)=    | 29 -> 39                          | 0.01269  |              |
|   | max(4)=    | 36 -> 37                         |        | 0.01789  |       | min(1)=    | 36 -> 40                          | -0.16744 |              |
|   | max(5)=    | 29 -> 37                         |        | 0.01470  |       | min(2)=    | 31 -> 40                          | -0.06675 |              |
|   | min(1)=    | 32 -> 40                         |        | -0.17158 |       | min(3)=    | 36 -> 42                          | -0.04391 |              |
|   | min(2)=    | 32 -> 39                         |        | -0.10632 |       | min(4)=    | 31 -> 42                          | -0.04329 |              |
|   | min(3)=    | 32 -> 46                         |        | -0.02523 |       | min(5)=    | 35 -> 41                          | -0.04238 |              |
|   | min(4)=    | 25 -> 40                         |        | -0.01736 |       |            | #CIs=2380 #CIs>0=1048 #CIs<0=994  |          |              |
|   | min(5)=    | 32 -> 42                         |        | -0.01392 |       |            |                                   |          |              |
|   |            | #CIs=2370 #CIs>0=920 #CIs<0=932  |        |          | 7     | Singlet-A' | 6.6277                            | 187.07   | 0.0327 0.000 |
|   |            |                                  |        |          |       | max(1)=    | 36 -> 40                          | 0.53002  |              |
| 4 | Singlet-A" | 4.9397                           | 251.00 | 0.0078   | 0.000 | max(2)=    | 35 -> 38                          | 0.42128  |              |
|   | max(1)=    | 36 -> 38                         |        | 0.56495  |       | max(3)=    | 31 -> 37                          | 0.11707  |              |
|   | max(2)=    | 33 -> 37                         |        | 0.06008  |       | max(4)=    | 36 -> 39                          | 0.09771  |              |
|   | max(3)=    | 22 -> 38                         |        | 0.01137  |       | max(5)=    | 32 -> 47                          | 0.03359  |              |
|   | max(4)=    | 33 -> 40                         |        | 0.01077  |       | min(1)=    | 31 -> 39                          | -0.05435 |              |
|   | max(5)=    | 35 -> 68                         |        | 0.00757  |       | min(2)=    | 33 -> 38                          | -0.05033 |              |
|   | min(1)=    | 35 -> 37                         |        | -0.39877 |       | min(3)=    | 36 -> 37                          | -0.04930 |              |
|   | min(2)=    | 35 -> 40                         |        | -0.11204 |       | min(4)=    | 29 -> 37                          | -0.04028 |              |
|   | min(3)=    | 35 -> 39                         |        | -0.05993 |       | min(5)=    | 31 -> 40                          | -0.02849 |              |
|   | min(4)=    | 31 -> 38                         |        | -0.04252 |       |            | #CIs=2386 #CIs>0=1091 #CIs<0=1029 |          |              |
|   | min(5)=    | 35 -> 42                         |        | -0.01043 |       |            |                                   |          |              |
|   |            | #CIs=2284 #CIs>0=938 #CIs<0=1006 |        |          | 8     | Singlet-A" | 6.7048                            | 184.92   | 0.1439 0.000 |
|   |            |                                  |        |          |       | max(1)=    | 33 -> 37                          | 0.69091  |              |
| 5 | Singlet-A" | 5.8000                           | 213.77 | 0.0805   | 0.000 | max(2)=    | 32 -> 54                          | 0.04678  |              |
|   | max(1)=    | 35 -> 37                         |        | 0.57965  |       | max(3)=    | 32 -> 50                          | 0.04168  |              |
|   | max(2)=    | 36 -> 38                         |        | 0.39505  |       | max(4)=    | 34 -> 53                          | 0.03616  |              |
|   | max(3)=    | 33 -> 37                         |        | 0.06330  |       | max(5)=    | 34 -> 55                          | 0.03615  |              |
|   | max(4)=    | 31 -> 38                         |        | 0.04339  |       | min(1)=    | 36 -> 38                          | -0.08037 |              |
|   | max(5)=    | 35 -> 56                         |        | 0.01607  |       | min(2)=    | 31 -> 38                          | -0.06296 |              |
|   | min(1)=    | 35 -> 40                         |        | -0.04377 |       | min(3)=    | 34 -> 51                          | -0.05866 |              |
|   | min(2)=    | 35 -> 39                         |        | -0.02591 |       | min(4)=    | 33 -> 40                          | -0.02648 |              |
|   | min(3)=    | 36 -> 41                         |        | -0.01366 |       | min(5)=    | 33 -> 39                          | -0.02329 |              |
|   | min(4)=    | 26 -> 48                         |        | -0.01303 |       |            | #CIs=2286 #CIs>0=998 #CIs<0=977   |          |              |
|   | min(5)=    | 27 -> 48                         |        | -0.01253 |       |            |                                   |          |              |
|   |            | #CIs=2288 #CIs>0=941 #CIs<0=1005 |        |          | 9     | Singlet-A" | 7.1817                            | 172.64   | 0.0007 0.000 |
|   |            |                                  |        |          |       | max(1)=    | 36 -> 41                          | 0.66631  |              |
| 6 | Singlet-A' | 6.2642                           | 197.92 | 0.0016   | 0.000 | max(2)=    | 31 -> 41                          | 0.10009  |              |
|   | max(1)=    | 36 -> 39                         |        | 0.66406  |       | max(3)=    | 35 -> 40                          | 0.02612  |              |

|    |            |                                   |          |          |       |            |        |                                  |          |          |  |  |  |
|----|------------|-----------------------------------|----------|----------|-------|------------|--------|----------------------------------|----------|----------|--|--|--|
|    |            | max(4)=                           | 35 -> 44 | 0.02377  |       |            |        | min(1)=                          | 36 -> 42 | -0.15049 |  |  |  |
|    |            | max(5)=                           | 36 -> 52 | 0.01737  |       |            |        | min(2)=                          | 28 -> 37 | -0.02735 |  |  |  |
|    |            | min(1)=                           | 35 -> 39 | -0.13953 |       |            |        | min(3)=                          | 31 -> 37 | -0.02660 |  |  |  |
|    |            | min(2)=                           | 36 -> 43 | -0.10302 |       |            |        | min(4)=                          | 26 -> 38 | -0.02507 |  |  |  |
|    |            | min(3)=                           | 35 -> 42 | -0.07181 |       |            |        | min(5)=                          | 30 -> 38 | -0.02437 |  |  |  |
|    |            | min(4)=                           | 31 -> 43 | -0.06226 |       |            |        | #CIs=2377 #CIs>0=924 #CIs<0=958  |          |          |  |  |  |
|    |            | min(5)=                           | 36 -> 45 | -0.02544 |       |            |        |                                  |          |          |  |  |  |
|    |            | #CIs=2279 #CIs>0=896 #CIs<0=941   |          |          | 13    | Singlet-A" | 7.5448 | 164.33                           | 0.0000   | 0.000    |  |  |  |
|    |            |                                   |          |          |       |            |        | max(1)=                          | 30 -> 37 | 0.66268  |  |  |  |
| 10 | Singlet-A' | 7.1897                            | 172.45   | 0.4941   | 0.000 |            |        | max(2)=                          | 32 -> 38 | 0.16383  |  |  |  |
|    |            | max(1)=                           | 35 -> 38 | 0.53271  |       |            |        | max(3)=                          | 30 -> 40 | 0.11088  |  |  |  |
|    |            | max(2)=                           | 36 -> 42 | 0.08728  |       |            |        | max(4)=                          | 30 -> 39 | 0.05602  |  |  |  |
|    |            | max(3)=                           | 36 -> 46 | 0.03948  |       |            |        | max(5)=                          | 26 -> 40 | 0.03096  |  |  |  |
|    |            | max(4)=                           | 28 -> 49 | 0.02864  |       |            |        | min(1)=                          | 26 -> 37 | -0.08087 |  |  |  |
|    |            | max(5)=                           | 30 -> 50 | 0.02776  |       |            |        | min(2)=                          | 27 -> 37 | -0.05126 |  |  |  |
|    |            | min(1)=                           | 36 -> 40 | -0.36762 |       |            |        | min(3)=                          | 25 -> 38 | -0.04847 |  |  |  |
|    |            | min(2)=                           | 31 -> 37 | -0.19607 |       |            |        | min(4)=                          | 26 -> 46 | -0.02996 |  |  |  |
|    |            | min(3)=                           | 36 -> 39 | -0.12175 |       |            |        | min(5)=                          | 18 -> 37 | -0.02679 |  |  |  |
|    |            | min(4)=                           | 36 -> 37 | -0.09733 |       |            |        | #CIs=2246 #CIs>0=914 #CIs<0=880  |          |          |  |  |  |
|    |            | min(5)=                           | 31 -> 40 | -0.04234 |       |            |        |                                  |          |          |  |  |  |
|    |            | #CIs=2383 #CIs>0=1034 #CIs<0=1070 |          |          | 14    | Singlet-A' | 7.6230 | 162.64                           | 0.0391   | 0.000    |  |  |  |
|    |            |                                   |          |          |       |            |        | max(1)=                          | 31 -> 37 | 0.63006  |  |  |  |
| 11 | Singlet-A' | 7.4228                            | 167.03   | 0.0220   | 0.000 |            |        | max(2)=                          | 35 -> 38 | 0.09946  |  |  |  |
|    |            | max(1)=                           | 36 -> 42 | 0.66257  |       |            |        | max(3)=                          | 28 -> 37 | 0.08293  |  |  |  |
|    |            | max(2)=                           | 34 -> 38 | 0.15575  |       |            |        | max(4)=                          | 36 -> 37 | 0.07994  |  |  |  |
|    |            | max(3)=                           | 31 -> 37 | 0.06325  |       |            |        | max(5)=                          | 31 -> 40 | 0.03923  |  |  |  |
|    |            | max(4)=                           | 36 -> 39 | 0.05626  |       |            |        | min(1)=                          | 36 -> 40 | -0.20456 |  |  |  |
|    |            | max(5)=                           | 36 -> 49 | 0.04302  |       |            |        | min(2)=                          | 29 -> 37 | -0.10439 |  |  |  |
|    |            | min(1)=                           | 35 -> 38 | -0.07269 |       |            |        | min(3)=                          | 36 -> 39 | -0.10260 |  |  |  |
|    |            | min(2)=                           | 35 -> 41 | -0.06998 |       |            |        | min(4)=                          | 33 -> 38 | -0.08697 |  |  |  |
|    |            | min(3)=                           | 31 -> 39 | -0.05663 |       |            |        | min(5)=                          | 36 -> 42 | -0.04849 |  |  |  |
|    |            | min(4)=                           | 36 -> 44 | -0.05501 |       |            |        | #CIs=2384 #CIs>0=984 #CIs<0=1104 |          |          |  |  |  |
|    |            | min(5)=                           | 31 -> 44 | -0.04814 |       |            |        |                                  |          |          |  |  |  |
|    |            | #CIs=2382 #CIs>0=1044 #CIs<0=1007 |          |          | 15    | Singlet-A" | 7.7354 | 160.28                           | 0.0001   | 0.000    |  |  |  |
|    |            |                                   |          |          |       |            |        | max(1)=                          | 32 -> 38 | 0.67753  |  |  |  |
| 12 | Singlet-A' | 7.4434                            | 166.57   | 0.0007   | 0.000 |            |        | max(2)=                          | 19 -> 38 | 0.02657  |  |  |  |
|    |            | max(1)=                           | 34 -> 38 | 0.68458  |       |            |        | max(3)=                          | 27 -> 37 | 0.02113  |  |  |  |
|    |            | max(2)=                           | 27 -> 38 | 0.04068  |       |            |        | max(4)=                          | 27 -> 46 | 0.01497  |  |  |  |
|    |            | max(3)=                           | 35 -> 41 | 0.01889  |       |            |        | max(5)=                          | 17 -> 38 | 0.01420  |  |  |  |
|    |            | max(4)=                           | 36 -> 44 | 0.01465  |       |            |        | min(1)=                          | 30 -> 37 | -0.16407 |  |  |  |
|    |            | max(5)=                           | 31 -> 39 | 0.01255  |       |            |        | min(2)=                          | 28 -> 38 | -0.05006 |  |  |  |

|    |            |                                 |          |          |       |            |                                 |          |          |       |  |
|----|------------|---------------------------------|----------|----------|-------|------------|---------------------------------|----------|----------|-------|--|
|    |            | min(3)=                         | 34 -> 40 | -0.04518 |       |            | max(4)=                         | 29 -> 41 | 0.05276  |       |  |
|    |            | min(4)=                         | 29 -> 38 | -0.03759 |       |            | max(5)=                         | 35 -> 47 | 0.03375  |       |  |
|    |            | min(5)=                         | 25 -> 38 | -0.03612 |       |            | min(1)=                         | 35 -> 40 | -0.36951 |       |  |
|    |            | #CIs=2267 #CIs>0=826 #CIs<0=884 |          |          |       |            | min(2)=                         | 36 -> 43 | -0.13542 |       |  |
| 16 | Singlet-A" | 7.8651                          | 157.64   | 0.0993   | 0.000 |            | min(3)=                         | 31 -> 38 | -0.09207 |       |  |
|    |            | max(1)=                         | 35 -> 40 | 0.47058  |       |            | min(4)=                         | 36 -> 45 | -0.06702 |       |  |
|    |            | max(2)=                         | 35 -> 39 | 0.40130  |       |            | min(5)=                         | 31 -> 43 | -0.05483 |       |  |
|    |            | max(3)=                         | 31 -> 38 | 0.29149  |       |            | #CIs=2281 #CIs>0=932 #CIs<0=910 |          |          |       |  |
|    |            | max(4)=                         | 36 -> 38 | 0.12151  | 19    | Singlet-A' | 8.2584                          | 150.13   | 0.0072   | 0.000 |  |
|    |            | max(5)=                         | 36 -> 41 | 0.08271  |       |            | max(1)=                         | 30 -> 38 | 0.69695  |       |  |
|    |            | min(1)=                         | 35 -> 37 | -0.05165 |       |            | max(2)=                         | 34 -> 38 | 0.02548  |       |  |
|    |            | min(2)=                         | 33 -> 40 | -0.02993 |       |            | max(3)=                         | 29 -> 37 | 0.02274  |       |  |
|    |            | min(3)=                         | 33 -> 39 | -0.02822 |       |            | max(4)=                         | 28 -> 37 | 0.02218  |       |  |
|    |            | min(4)=                         | 30 -> 49 | -0.01664 |       |            | max(5)=                         | 30 -> 67 | 0.02019  |       |  |
|    |            | min(5)=                         | 27 -> 48 | -0.01563 |       |            | min(1)=                         | 25 -> 37 | -0.05918 |       |  |
|    |            | #CIs=2287 #CIs>0=979 #CIs<0=975 |          |          |       |            | min(2)=                         | 25 -> 46 | -0.05514 |       |  |
|    |            |                                 |          |          |       |            | min(3)=                         | 35 -> 41 | -0.04625 |       |  |
| 17 | Singlet-A' | 7.9323                          | 156.30   | 0.0001   | 0.000 |            | min(4)=                         | 18 -> 38 | -0.02335 |       |  |
|    |            | max(1)=                         | 33 -> 38 | 0.69822  |       |            | min(5)=                         | 36 -> 44 | -0.02257 |       |  |
|    |            | max(2)=                         | 31 -> 37 | 0.09378  |       |            | #CIs=2365 #CIs>0=883 #CIs<0=926 |          |          |       |  |
|    |            | max(3)=                         | 35 -> 38 | 0.03286  |       |            |                                 |          |          |       |  |
|    |            | max(4)=                         | 36 -> 40 | 0.01651  | 20    | Singlet-A" | 8.2595                          | 150.11   | 0.0000   | 0.000 |  |
|    |            | max(5)=                         | 32 -> 42 | 0.01537  |       |            | max(1)=                         | 34 -> 40 | 0.55705  |       |  |
|    |            | min(1)=                         | 22 -> 37 | -0.01804 |       |            | max(2)=                         | 34 -> 39 | 0.34114  |       |  |
|    |            | min(2)=                         | 34 -> 43 | -0.01095 |       |            | max(3)=                         | 34 -> 37 | 0.21020  |       |  |
|    |            | min(3)=                         | 22 -> 46 | -0.00934 |       |            | max(4)=                         | 34 -> 46 | 0.11978  |       |  |
|    |            | min(4)=                         | 33 -> 43 | -0.00677 |       |            | max(5)=                         | 32 -> 38 | 0.05640  |       |  |
|    |            | min(5)=                         | 34 -> 41 | -0.00641 |       |            | min(1)=                         | 26 -> 37 | -0.04796 |       |  |
|    |            | #CIs=2377 #CIs>0=976 #CIs<0=971 |          |          |       |            | min(2)=                         | 28 -> 38 | -0.02493 |       |  |
|    |            |                                 |          |          |       |            | min(3)=                         | 21 -> 37 | -0.02372 |       |  |
| 18 | Singlet-A" | 8.1246                          | 152.60   | 0.0000   | 0.000 |            | min(4)=                         | 29 -> 38 | -0.01843 |       |  |
|    |            | max(1)=                         | 35 -> 39 | 0.45817  |       |            | min(5)=                         | 26 -> 40 | -0.01467 |       |  |
|    |            | max(2)=                         | 35 -> 42 | 0.30658  |       |            | #CIs=2255 #CIs>0=846 #CIs<0=885 |          |          |       |  |
|    |            | max(3)=                         | 36 -> 41 | 0.11483  |       |            |                                 |          |          |       |  |

### 16.1.3 Main contributions from different excited states at CIS approach

|          |            |       |               |         |        |            |          |        |         |       |
|----------|------------|-------|---------------|---------|--------|------------|----------|--------|---------|-------|
| #_exc.st | ___symm___ | Exc.E | Osc._Strength | ___f___ | <S**2> | Singlet-A" | 5.5098   | 225.03 | 0.0000  | 0.000 |
|          |            |       |               |         |        | max(1)=    | 33 -> 37 |        | 0.58784 |       |

|   |  |                                            |          |          |        |       |  |                                          |             |          |        |        |       |
|---|--|--------------------------------------------|----------|----------|--------|-------|--|------------------------------------------|-------------|----------|--------|--------|-------|
|   |  | max(2)=                                    | 33 -> 41 | 0.05815  |        |       |  | max(4)=                                  | 35 -> 46    | 0.01616  |        |        |       |
|   |  | max(3)=                                    | 33 -> 47 | 0.05713  |        |       |  | max(5)=                                  | 22 -> 38    | 0.01370  |        |        |       |
|   |  | max(4)=                                    | 27 -> 42 | 0.03547  |        |       |  | min(1)=                                  | 32 -> 38    | -0.03869 |        |        |       |
|   |  | max(5)=                                    | 33 -> 44 | 0.02378  |        |       |  | min(2)=                                  | 29 -> 38    | -0.03234 |        |        |       |
|   |  | min(1)=                                    | 33 -> 42 | -0.36190 |        |       |  | min(3)=                                  | 34 -> 37    | -0.02463 |        |        |       |
|   |  | min(2)=                                    | 33 -> 39 | -0.05465 |        |       |  | min(4)=                                  | 36 -> 66    | -0.01699 |        |        |       |
|   |  | min(3)=                                    | 33 -> 46 | -0.05187 |        |       |  | min(5)=                                  | 35 -> 47    | -0.01625 |        |        |       |
|   |  | min(4)=                                    | 33 -> 92 | -0.04773 |        |       |  | #states=1243 #states>0=638 #states<0=605 |             |          |        |        |       |
|   |  | min(5)=                                    | 27 -> 37 | -0.03918 |        |       |  |                                          |             |          |        |        |       |
|   |  | #states=936 #states>0=500 #states<0=436 5  |          |          |        |       |  |                                          | Singlet-A'  | 7.3223   | 169.33 | 0.0023 | 0.000 |
|   |  |                                            |          |          |        |       |  | max(1)=                                  | 36 -> 39    | 0.64341  |        |        |       |
| 2 |  | Singlet-A'                                 | 5.7079   | 217.22   | 0.3688 | 0.000 |  | max(2)=                                  | 32 -> 39    | 0.19934  |        |        |       |
|   |  | max(1)=                                    | 36 -> 37 | 0.63296  |        |       |  | max(3)=                                  | 31 -> 39    | 0.06652  |        |        |       |
|   |  | max(2)=                                    | 36 -> 42 | 0.09732  |        |       |  | max(4)=                                  | 29 -> 39    | 0.05574  |        |        |       |
|   |  | max(3)=                                    | 32 -> 42 | 0.05243  |        |       |  | max(5)=                                  | 32 -> 37    | 0.04943  |        |        |       |
|   |  | max(4)=                                    | 32 -> 47 | 0.02898  |        |       |  | min(1)=                                  | 35 -> 40    | -0.09036 |        |        |       |
|   |  | max(5)=                                    | 32 -> 39 | 0.02407  |        |       |  | min(2)=                                  | 36 -> 41    | -0.08159 |        |        |       |
|   |  | min(1)=                                    | 35 -> 38 | -0.24506 |        |       |  | min(3)=                                  | 32 -> 41    | -0.07216 |        |        |       |
|   |  | min(2)=                                    | 32 -> 37 | -0.09776 |        |       |  | min(4)=                                  | 29 -> 41    | -0.04635 |        |        |       |
|   |  | min(3)=                                    | 31 -> 37 | -0.03827 |        |       |  | min(5)=                                  | 32 -> 42    | -0.02954 |        |        |       |
|   |  | min(4)=                                    | 29 -> 42 | -0.03238 |        |       |  | #states=1237 #states>0=606 #states<0=631 |             |          |        |        |       |
|   |  | min(5)=                                    | 32 -> 46 | -0.03001 |        |       |  |                                          |             |          |        |        |       |
|   |  | #states=1569 #states>0=810 #states<0=759 6 |          |          |        |       |  |                                          | Singlet-A'' | 7.4245   | 166.99 | 0.1003 | 0.000 |
|   |  |                                            |          |          |        |       |  | max(1)=                                  | 35 -> 37    | 0.47927  |        |        |       |
| 3 |  | Singlet-A'                                 | 5.8463   | 212.07   | 0.0001 | 0.000 |  | max(2)=                                  | 34 -> 37    | 0.31672  |        |        |       |
|   |  | max(1)=                                    | 31 -> 37 | 0.56145  |        |       |  | max(3)=                                  | 33 -> 53    | 0.03411  |        |        |       |
|   |  | max(2)=                                    | 32 -> 42 | 0.10947  |        |       |  | max(4)=                                  | 34 -> 41    | 0.02654  |        |        |       |
|   |  | max(3)=                                    | 31 -> 41 | 0.05369  |        |       |  | max(5)=                                  | 35 -> 42    | 0.02202  |        |        |       |
|   |  | max(4)=                                    | 31 -> 47 | 0.05100  |        |       |  | min(1)=                                  | 36 -> 38    | -0.34403 |        |        |       |
|   |  | max(5)=                                    | 28 -> 37 | 0.04833  |        |       |  | min(2)=                                  | 34 -> 42    | -0.16032 |        |        |       |
|   |  | min(1)=                                    | 31 -> 42 | -0.33298 |        |       |  | min(3)=                                  | 36 -> 40    | -0.03537 |        |        |       |
|   |  | min(2)=                                    | 32 -> 37 | -0.18679 |        |       |  | min(4)=                                  | 34 -> 39    | -0.02745 |        |        |       |
|   |  | min(3)=                                    | 31 -> 39 | -0.05136 |        |       |  | min(5)=                                  | 30 -> 49    | -0.01941 |        |        |       |
|   |  | min(4)=                                    | 25 -> 42 | -0.04556 |        |       |  | #states=1511 #states>0=734 #states<0=777 |             |          |        |        |       |
|   |  | min(5)=                                    | 31 -> 46 | -0.04288 |        |       |  |                                          |             |          |        |        |       |
|   |  | #states=1129 #states>0=554 #states<0=575 7 |          |          |        |       |  |                                          | Singlet-A'  | 7.6171   | 162.77 | 0.8431 | 0.000 |
|   |  |                                            |          |          |        |       |  | max(1)=                                  | 35 -> 38    | 0.57447  |        |        |       |
| 4 |  | Singlet-A''                                | 5.8607   | 211.55   | 0.0093 | 0.000 |  | max(2)=                                  | 36 -> 37    | 0.24933  |        |        |       |
|   |  | max(1)=                                    | 36 -> 38 | 0.55319  |        |       |  | max(3)=                                  | 32 -> 42    | 0.08185  |        |        |       |
|   |  | max(2)=                                    | 35 -> 37 | 0.40760  |        |       |  | max(4)=                                  | 36 -> 41    | 0.04127  |        |        |       |
|   |  | max(3)=                                    | 35 -> 42 | 0.13750  |        |       |  | max(5)=                                  | 29 -> 37    | 0.03859  |        |        |       |

|    |            |                                             |          |          |       |                                          |          |          |        |       |
|----|------------|---------------------------------------------|----------|----------|-------|------------------------------------------|----------|----------|--------|-------|
|    |            | min(1)=                                     | 36 -> 42 | -0.26216 |       | min(3)=                                  | 32 -> 37 | -0.10099 |        |       |
|    |            | min(2)=                                     | 32 -> 37 | -0.04104 |       | min(4)=                                  | 35 -> 38 | -0.09470 |        |       |
|    |            | min(3)=                                     | 29 -> 46 | -0.03809 |       | min(5)=                                  | 36 -> 44 | -0.08983 |        |       |
|    |            | min(4)=                                     | 32 -> 47 | -0.03222 |       | #states=1381 #states>0=695 #states<0=686 |          |          |        |       |
|    |            | min(5)=                                     | 35 -> 40 | -0.02944 |       |                                          |          |          |        |       |
|    |            | #states=1497 #states>0=746 #states<0=751 11 |          |          |       | Singlet-A'                               | 8.6676   | 143.04   | 0.2843 | 0.000 |
| 8  | Singlet-A" | 8.0297                                      | 154.41   | 0.5747   | 0.000 | max(1)=                                  | 36 -> 42 | 0.53589  |        |       |
|    |            | max(2)=                                     | 34 -> 37 | 0.49417  |       | max(2)=                                  | 32 -> 37 | 0.28404  |        |       |
|    |            | max(3)=                                     | 36 -> 40 | 0.21626  |       | max(3)=                                  | 35 -> 38 | 0.22981  |        |       |
|    |            | max(4)=                                     | 36 -> 38 | 0.21187  |       | max(4)=                                  | 36 -> 41 | 0.14066  |        |       |
|    |            | max(5)=                                     | 32 -> 38 | 0.05888  |       | max(5)=                                  | 31 -> 37 | 0.09234  |        |       |
|    |            | min(1)=                                     | 35 -> 37 | -0.24062 |       | min(1)=                                  | 29 -> 37 | -0.07116 |        |       |
|    |            | min(2)=                                     | 34 -> 42 | -0.21080 |       | min(2)=                                  | 35 -> 40 | -0.06031 |        |       |
|    |            | min(3)=                                     | 35 -> 39 | -0.08995 |       | min(3)=                                  | 36 -> 46 | -0.06008 |        |       |
|    |            | min(4)=                                     | 36 -> 43 | -0.06050 |       | min(4)=                                  | 32 -> 39 | -0.05625 |        |       |
|    |            | min(5)=                                     | 35 -> 41 | -0.04964 |       | min(5)=                                  | 36 -> 44 | -0.05621 |        |       |
|    |            | #states=1565 #states>0=837 #states<0=728 12 |          |          |       | Singlet-A"                               | 9.0484   | 137.02   | 0.0097 | 0.000 |
| 9  | Singlet-A" | 8.1873                                      | 151.43   | 0.1561   | 0.000 | max(1)=                                  | 35 -> 41 | 0.42280  |        |       |
|    |            | max(2)=                                     | 36 -> 40 | 0.53804  |       | max(2)=                                  | 35 -> 39 | 0.37819  |        |       |
|    |            | max(3)=                                     | 35 -> 37 | 0.13588  |       | max(3)=                                  | 36 -> 40 | 0.21023  |        |       |
|    |            | max(4)=                                     | 32 -> 40 | 0.12651  |       | max(4)=                                  | 29 -> 40 | 0.10646  |        |       |
|    |            | max(5)=                                     | 34 -> 42 | 0.07477  |       | max(5)=                                  | 32 -> 40 | 0.03901  |        |       |
|    |            | min(1)=                                     | 35 -> 39 | -0.23817 |       | min(1)=                                  | 36 -> 43 | -0.23315 |        |       |
|    |            | min(2)=                                     | 34 -> 37 | -0.17936 |       | min(2)=                                  | 36 -> 45 | -0.15818 |        |       |
|    |            | min(3)=                                     | 35 -> 41 | -0.17678 |       | min(3)=                                  | 32 -> 43 | -0.12828 |        |       |
|    |            | min(4)=                                     | 36 -> 43 | -0.10495 |       | min(4)=                                  | 32 -> 45 | -0.06225 |        |       |
|    |            | min(5)=                                     | 36 -> 38 | -0.09972 |       | min(5)=                                  | 31 -> 43 | -0.04259 |        |       |
|    |            | #states=1439 #states>0=694 #states<0=745 13 |          |          |       | Singlet-A"                               | 9.4584   | 131.08   | 0.0001 | 0.000 |
| 10 | Singlet-A' | 8.4423                                      | 146.86   | 0.0443   | 0.000 | max(1)=                                  | 30 -> 37 | 0.62707  |        |       |
|    |            | max(2)=                                     | 36 -> 41 | 0.60649  |       | max(2)=                                  | 30 -> 42 | 0.20653  |        |       |
|    |            | max(3)=                                     | 36 -> 39 | 0.09661  |       | max(3)=                                  | 25 -> 38 | 0.08646  |        |       |
|    |            | max(4)=                                     | 36 -> 49 | 0.07681  |       | max(4)=                                  | 26 -> 47 | 0.07326  |        |       |
|    |            | max(5)=                                     | 32 -> 41 | 0.04884  |       | max(5)=                                  | 26 -> 42 | 0.06247  |        |       |
|    |            | min(1)=                                     | 36 -> 57 | 0.03479  |       | min(1)=                                  | 31 -> 38 | -0.08043 |        |       |
|    |            | min(2)=                                     | 35 -> 40 | -0.18959 |       | min(2)=                                  | 26 -> 37 | -0.07234 |        |       |
|    |            | min(3)=                                     | 36 -> 42 | -0.10571 |       | min(3)=                                  | 26 -> 46 | -0.06514 |        |       |
|    |            |                                             |          |          |       | min(4)=                                  | 18 -> 37 | -0.06292 |        |       |

|    |            |        |              |               |               |       |            |              |               |               |
|----|------------|--------|--------------|---------------|---------------|-------|------------|--------------|---------------|---------------|
|    |            |        | min(5)=      | 27 -> 37      | -0.05227      |       |            |              |               |               |
|    |            |        | #states=1177 | #states>0=581 | #states<0=596 | 17    | Singlet-A" | 9.9934       | 124.07        | 0.0538 0.000  |
|    |            |        |              |               |               |       |            | max(1)=      | 35 -> 42      | 0.31484       |
| 14 | Singlet-A' | 9.5700 |              | 129.56        | 0.0321        | 0.000 |            | max(2)=      | 32 -> 40      | 0.12946       |
|    |            |        | max(1)=      | 35 -> 40      | 0.53968       |       |            | max(3)=      | 35 -> 39      | 0.07920       |
|    |            |        | max(2)=      | 36 -> 41      | 0.21176       |       |            | max(4)=      | 35 -> 47      | 0.07183       |
|    |            |        | max(3)=      | 36 -> 44      | 0.19202       |       |            | max(5)=      | 29 -> 38      | 0.04884       |
|    |            |        | max(4)=      | 30 -> 38      | 0.15759       |       |            | min(1)=      | 36 -> 43      | -0.40473      |
|    |            |        | max(5)=      | 35 -> 43      | 0.15757       |       |            | min(2)=      | 35 -> 41      | -0.28927      |
|    |            |        | min(1)=      | 32 -> 41      | -0.13994      |       |            | min(3)=      | 32 -> 38      | -0.17211      |
|    |            |        | min(2)=      | 36 -> 47      | -0.06309      |       |            | min(4)=      | 36 -> 40      | -0.16871      |
|    |            |        | min(3)=      | 36 -> 46      | -0.06235      |       |            | min(5)=      | 36 -> 45      | -0.10903      |
|    |            |        | min(4)=      | 32 -> 39      | -0.05651      |       |            | #states=1321 | #states>0=647 | #states<0=674 |
|    |            |        | min(5)=      | 31 -> 41      | -0.04790      |       |            |              |               |               |
|    |            |        | #states=1053 | #states>0=529 | #states<0=524 | 18    | Singlet-A' | 10.0448      | 123.43        | 0.0418 0.000  |
|    |            |        |              |               |               |       |            | max(1)=      | 32 -> 37      | 0.53182       |
| 15 | Singlet-A" | 9.8449 |              | 125.94        | 0.0088        | 0.000 |            | max(2)=      | 32 -> 42      | 0.18720       |
|    |            |        | max(1)=      | 36 -> 43      | 0.35496       |       |            | max(3)=      | 31 -> 37      | 0.16067       |
|    |            |        | max(2)=      | 35 -> 42      | 0.31945       |       |            | max(4)=      | 28 -> 37      | 0.08075       |
|    |            |        | max(3)=      | 35 -> 39      | 0.31872       |       |            | max(5)=      | 36 -> 37      | 0.07715       |
|    |            |        | max(4)=      | 36 -> 40      | 0.23643       |       |            | min(1)=      | 36 -> 42      | -0.28445      |
|    |            |        | max(5)=      | 36 -> 45      | 0.09520       |       |            | min(2)=      | 35 -> 38      | -0.14260      |
|    |            |        | min(1)=      | 32 -> 38      | -0.22183      |       |            | min(3)=      | 29 -> 37      | -0.06647      |
|    |            |        | min(2)=      | 35 -> 41      | -0.11590      |       |            | min(4)=      | 36 -> 46      | -0.04413      |
|    |            |        | min(3)=      | 32 -> 40      | -0.07422      |       |            | min(5)=      | 22 -> 42      | -0.04243      |
|    |            |        | min(4)=      | 35 -> 37      | -0.07377      |       |            | #states=1556 | #states>0=769 | #states<0=787 |
|    |            |        | min(5)=      | 31 -> 38      | -0.06564      |       |            |              |               |               |
|    |            |        | #states=1277 | #states>0=634 | #states<0=643 | 19    | Singlet-A" | 10.1433      | 122.23        | 0.0055 0.000  |
|    |            |        |              |               |               |       |            | max(1)=      | 35 -> 41      | 0.37503       |
| 16 | Singlet-A' | 9.8472 |              | 125.91        | 0.0037        | 0.000 |            | max(2)=      | 35 -> 42      | 0.33782       |
|    |            |        | max(1)=      | 30 -> 38      | 0.64910       |       |            | max(3)=      | 35 -> 44      | 0.11629       |
|    |            |        | max(2)=      | 25 -> 37      | 0.09071       |       |            | max(4)=      | 35 -> 48      | 0.06013       |
|    |            |        | max(3)=      | 25 -> 46      | 0.06155       |       |            | max(5)=      | 29 -> 43      | 0.05686       |
|    |            |        | max(4)=      | 32 -> 41      | 0.02758       |       |            | min(1)=      | 35 -> 39      | -0.38699      |
|    |            |        | max(5)=      | 19 -> 37      | 0.02354       |       |            | min(2)=      | 32 -> 38      | -0.20323      |
|    |            |        | min(1)=      | 35 -> 40      | -0.15095      |       |            | min(3)=      | 31 -> 38      | -0.07251      |
|    |            |        | min(2)=      | 25 -> 47      | -0.06939      |       |            | min(4)=      | 35 -> 37      | -0.06022      |
|    |            |        | min(3)=      | 33 -> 38      | -0.06715      |       |            | min(5)=      | 35 -> 46      | -0.04214      |
|    |            |        | min(4)=      | 28 -> 37      | -0.06247      |       |            | #states=1218 | #states>0=618 | #states<0=600 |
|    |            |        | min(5)=      | 27 -> 38      | -0.05452      |       |            |              |               |               |
|    |            |        | #states=1242 | #states>0=622 | #states<0=620 | 20    | Singlet-A" | 10.4551      | 118.59        | 0.0429 0.000  |

|         |          |          |                                          |          |          |
|---------|----------|----------|------------------------------------------|----------|----------|
| max(1)= | 28 -> 38 | 0.41404  | min(2)=                                  | 26 -> 37 | -0.11425 |
| max(2)= | 32 -> 38 | 0.30771  | min(3)=                                  | 27 -> 47 | -0.07235 |
| max(3)= | 35 -> 42 | 0.15807  | min(4)=                                  | 30 -> 37 | -0.06792 |
| max(4)= | 27 -> 37 | 0.14279  | min(5)=                                  | 21 -> 37 | -0.04397 |
| max(5)= | 29 -> 38 | 0.13131  | #states=1360 #states>0=681 #states<0=679 |          |          |
| min(1)= | 31 -> 38 | -0.30491 |                                          |          |          |

## 16.2 6-311++G(d,p)

### 16.2.1 Plots

Figure S28: For *p*-nitroaniline molecule and 6-311++G(d,p) basis set, variation of  $\alpha_{ZZ}$  (top) and  $\beta_{ZZZ}$  (middle) with respect to the number of orbitals (FIOs decomposition presented in this work, in Plots S28a and S28b) or states (SOS approaches, in Plots S28c and S28d). For  $\alpha$  FIOs, three approaches were considered: CPKS, CPHF and UPHF. For  $\beta$  FIOs, the results of CPKS and CPHF approaches are provided. Besides, a shorten range of number of orbitals/states can be seen in Plots S28e and S28f as well (bottom). All elements of the  $\beta$  tensor were recomputed with an error less than 1.00 au in the case of the FIOs. For SOS approach, TDDFT (CAM-B3LYP) and CIS methods were employed. Recomputed values of  $\alpha_{ZZ}$  and  $\beta_{ZZZ}$  for the different approaches are included in each plot. HOMO (H) and LUMO (L) are represented by blue and pink dotted lines, respectively.

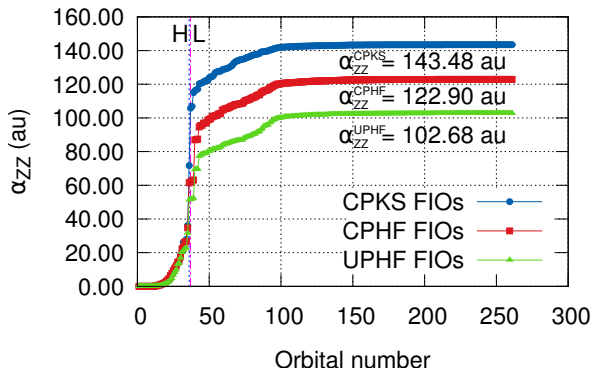

(a) CPKS-, CPHF- and UPHF-FIOs decomposition of  $\alpha_{ZZ}$  into MOs.

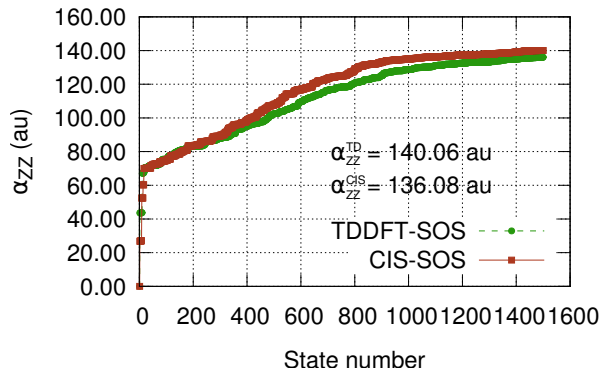

(b) TDDFT- and CIS-SOS decomposition of  $\alpha_{ZZ}$  into states.

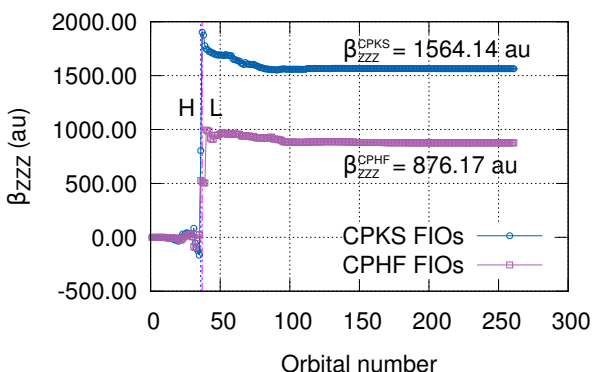

(c) CPKS- and CPHF-FIOs decomposition of  $\beta_{ZZZ}$  into MOs.

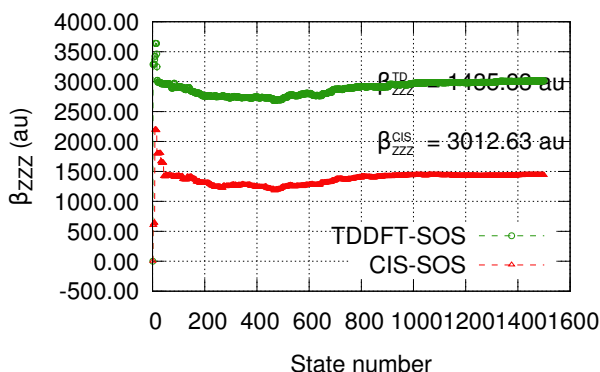

(d) TDDFT- and CIS-SOS decomposition of  $\beta_{ZZZ}$  into states.



Figure S28: (continued) For *p*-nitroaniline molecule and 6-311++G(d,p) basis set, variation of  $\alpha_{ZZ}$  (top) and  $\beta_{ZZZ}$  (middle) with respect to the number of orbitals (FIOs decomposition presented in this work, in Plots S28a and S28b) or states (SOS approaches, in Plots S28c and S28d). For  $\alpha$  FIOs, three approaches were considered: CPKS, CPHF and UPHF. For  $\beta$  FIOs, the results of CPKS and CPHF approaches are provided. Besides, a shorten range of number of orbitals/states can be seen in Plots S28e and S28f as well (bottom). All elements of the  $\beta$  tensor were recomputed with an error less than 1.00 au in the case of the FIOs. For SOS approach, TDDFT (CAM-B3LYP) and CIS methods were employed. Recomputed values of  $\alpha_{ZZ}$  and  $\beta_{ZZZ}$  for the different approaches are included in each plot. HOMO (H) and LUMO (L) are represented by blue and pink dotted lines, respectively.

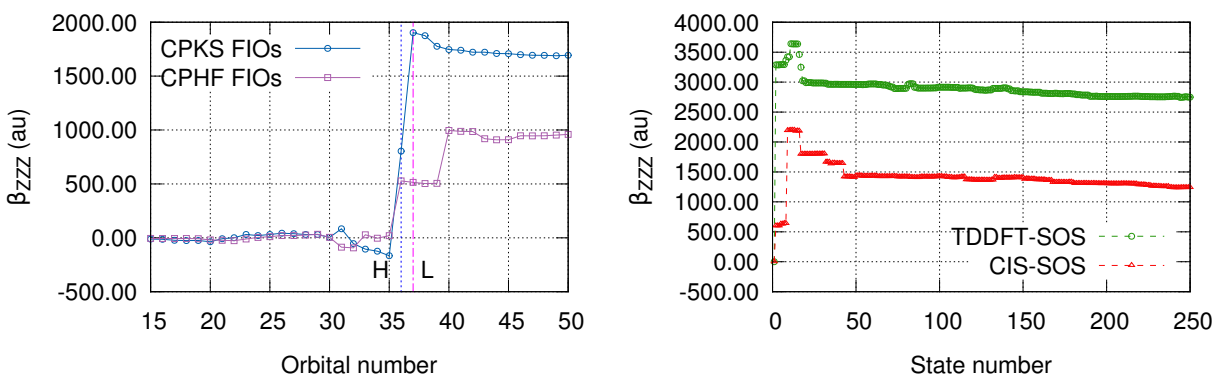

(e) CPKS- and CPHF-FIOs decomposition of  $\beta_{ZZZ}$  between MOs 15 and 50. (f) TDDFT- and CIS-SOS decomposition of  $\beta_{ZZZ}$  between states 1 and 250.

## 16.2.2 Main contributions from different excited states at TDDFT (CAM-B3LYP) approach

| #_exc.st | ___symm___  | Exc.E  | Osc._Strength | ___f___ | <S**2> |                                   |          |        |          |       |
|----------|-------------|--------|---------------|---------|--------|-----------------------------------|----------|--------|----------|-------|
|          |             |        |               |         | 2      | Singlet-A'                        | 4.4033   | 281.57 | 0.3807   | 0.000 |
| 1        | Singlet-A'' | 4.0380 | 307.04        | 0.0000  | 0.000  | max(1)=                           | 36 -> 37 |        | 0.68961  |       |
|          |             |        |               |         |        | max(2)=                           | 35 -> 39 |        | 0.09295  |       |
|          |             |        |               |         |        | max(3)=                           | 31 -> 43 |        | 0.05405  |       |
|          |             |        |               |         |        | max(4)=                           | 36 -> 43 |        | 0.02201  |       |
|          |             |        |               |         |        | max(5)=                           | 29 -> 37 |        | 0.01632  |       |
|          |             |        |               |         |        | min(1)=                           | 31 -> 37 |        | -0.09702 |       |
|          |             |        |               |         |        | min(2)=                           | 31 -> 55 |        | -0.01284 |       |
|          |             |        |               |         |        | min(3)=                           | 30 -> 64 |        | -0.01111 |       |
|          |             |        |               |         |        | min(4)=                           | 30 -> 90 |        | -0.01042 |       |
|          |             |        |               |         |        | min(5)=                           | 29 -> 43 |        | -0.01023 |       |
|          |             |        |               |         |        | #CIs=2983 #CIs>0=1335 #CIs<0=1343 |          |        |          |       |
|          |             |        |               |         |        | #CIs=2762 #CIs>0=994 #CIs<0=1022  |          |        |          |       |

|   |            |        |        |        |       |                                   |          |          |                                   |            |
|---|------------|--------|--------|--------|-------|-----------------------------------|----------|----------|-----------------------------------|------------|
| 3 | Singlet-A' | 4.6012 | 269.46 | 0.0005 | 0.000 | max(2)=                           | 36 -> 39 | 0.41501  |                                   |            |
|   |            |        |        |        |       | max(1)=                           | 32 -> 37 | 0.67632  | max(3)=                           | 33 -> 37   |
|   |            |        |        |        |       | max(2)=                           | 32 -> 51 | 0.04506  | max(4)=                           | 35 -> 47   |
|   |            |        |        |        |       | max(3)=                           | 32 -> 47 | 0.03300  | max(5)=                           | 31 -> 39   |
|   |            |        |        |        |       | max(4)=                           | 32 -> 55 | 0.02868  | min(1)=                           | 35 -> 43   |
|   |            |        |        |        |       | max(5)=                           | 25 -> 37 | 0.02423  | min(2)=                           | 33 -> 43   |
|   |            |        |        |        |       | min(1)=                           | 32 -> 43 | -0.18398 | min(3)=                           | 29 -> 49   |
|   |            |        |        |        |       | min(2)=                           | 32 -> 44 | -0.02653 | min(4)=                           | 35 -> 63   |
|   |            |        |        |        |       | min(3)=                           | 32 -> 88 | -0.02030 | min(5)=                           | 30 -> 76   |
|   |            |        |        |        |       | min(4)=                           | 32 -> 41 | -0.01939 | #CIs=2854 #CIs>0=1277 #CIs<0=1244 |            |
|   |            |        |        |        |       | min(5)=                           | 25 -> 43 | -0.01768 |                                   |            |
|   |            |        |        |        |       | #CIs=2927 #CIs>0=1152 #CIs<0=1123 |          |          | 7                                 | Singlet-A" |
|   |            |        |        |        |       |                                   |          |          |                                   | 6.1467     |
|   |            |        |        |        |       |                                   |          |          |                                   | 201.71     |
|   |            |        |        |        |       |                                   |          |          |                                   | 0.0000     |
|   |            |        |        |        |       |                                   |          |          |                                   | 0.000      |
|   |            |        |        |        |       | max(1)=                           | 36 -> 40 | 0.66365  |                                   |            |
| 4 | Singlet-A" | 4.8452 | 255.89 | 0.0038 | 0.000 | max(2)=                           | 36 -> 53 | 0.12893  |                                   |            |
|   |            |        |        |        |       | max(1)=                           | 36 -> 39 | 0.54751  | max(3)=                           | 31 -> 40   |
|   |            |        |        |        |       | max(2)=                           | 33 -> 37 | 0.05185  | max(4)=                           | 36 -> 46   |
|   |            |        |        |        |       | max(3)=                           | 35 -> 47 | 0.05100  | max(5)=                           | 36 -> 39   |
|   |            |        |        |        |       | max(4)=                           | 35 -> 55 | 0.02119  | min(1)=                           | 36 -> 42   |
|   |            |        |        |        |       | max(5)=                           | 35 -> 63 | 0.01279  | min(2)=                           | 35 -> 38   |
|   |            |        |        |        |       | min(1)=                           | 35 -> 37 | -0.42106 | min(3)=                           | 31 -> 42   |
|   |            |        |        |        |       | min(2)=                           | 35 -> 43 | -0.10818 | min(4)=                           | 35 -> 41   |
|   |            |        |        |        |       | min(3)=                           | 36 -> 40 | -0.04074 | min(5)=                           | 33 -> 37   |
|   |            |        |        |        |       | min(4)=                           | 31 -> 39 | -0.03949 | #CIs=2853 #CIs>0=1172 #CIs<0=1186 |            |
|   |            |        |        |        |       | min(5)=                           | 36 -> 58 | -0.03053 |                                   |            |
|   |            |        |        |        |       | #CIs=2854 #CIs>0=1217 #CIs<0=1280 |          |          | 8                                 | Singlet-A' |
|   |            |        |        |        |       |                                   |          |          |                                   | 6.2617     |
|   |            |        |        |        |       |                                   |          |          |                                   | 198.00     |
|   |            |        |        |        |       |                                   |          |          |                                   | 0.0013     |
|   |            |        |        |        |       |                                   |          |          |                                   | 0.000      |
|   |            |        |        |        |       | max(1)=                           | 36 -> 43 | 0.50496  |                                   |            |
| 5 | Singlet-A' | 5.3620 | 231.23 | 0.0020 | 0.000 | max(2)=                           | 36 -> 41 | 0.38669  |                                   |            |
|   |            |        |        |        |       | max(1)=                           | 36 -> 38 | 0.67834  | max(3)=                           | 35 -> 39   |
|   |            |        |        |        |       | max(2)=                           | 31 -> 38 | 0.09982  | max(4)=                           | 31 -> 37   |
|   |            |        |        |        |       | max(3)=                           | 36 -> 50 | 0.08541  | max(5)=                           | 36 -> 44   |
|   |            |        |        |        |       | max(4)=                           | 36 -> 45 | 0.08150  | min(1)=                           | 36 -> 52   |
|   |            |        |        |        |       | max(5)=                           | 31 -> 50 | 0.02506  | min(2)=                           | 35 -> 40   |
|   |            |        |        |        |       | min(1)=                           | 36 -> 48 | -0.06907 | min(3)=                           | 33 -> 39   |
|   |            |        |        |        |       | min(2)=                           | 36 -> 41 | -0.04091 | min(4)=                           | 36 -> 37   |
|   |            |        |        |        |       | min(3)=                           | 31 -> 41 | -0.03789 | min(5)=                           | 36 -> 55   |
|   |            |        |        |        |       | min(4)=                           | 36 -> 52 | -0.03591 | #CIs=2983 #CIs>0=1331 #CIs<0=1372 |            |
|   |            |        |        |        |       | min(5)=                           | 35 -> 40 | -0.03430 |                                   |            |
|   |            |        |        |        |       | #CIs=2974 #CIs>0=1235 #CIs<0=1213 |          |          | 9                                 | Singlet-A' |
|   |            |        |        |        |       |                                   |          |          |                                   | 6.3706     |
|   |            |        |        |        |       |                                   |          |          |                                   | 194.62     |
|   |            |        |        |        |       |                                   |          |          |                                   | 0.0086     |
|   |            |        |        |        |       |                                   |          |          |                                   | 0.000      |
|   |            |        |        |        |       | max(1)=                           | 36 -> 41 | 0.55650  |                                   |            |
| 6 | Singlet-A" | 5.5921 | 221.71 | 0.0721 | 0.000 | max(2)=                           | 36 -> 45 | 0.08250  |                                   |            |
|   |            |        |        |        |       | max(1)=                           | 35 -> 37 | 0.56127  | max(3)=                           | 36 -> 59   |
|   |            |        |        |        |       |                                   |          |          |                                   | 0.05380    |

|    |            |                                   |          |          |       |            |        |                                   |          |          |  |  |  |
|----|------------|-----------------------------------|----------|----------|-------|------------|--------|-----------------------------------|----------|----------|--|--|--|
|    |            | max(4)=                           | 36 -> 38 | 0.02285  |       |            |        | min(1)=                           | 36 -> 50 | -0.13576 |  |  |  |
|    |            | max(5)=                           | 33 -> 39 | 0.02265  |       |            |        | min(2)=                           | 36 -> 38 | -0.04860 |  |  |  |
|    |            | min(1)=                           | 36 -> 43 | -0.34025 |       |            |        | min(3)=                           | 36 -> 41 | -0.04205 |  |  |  |
|    |            | min(2)=                           | 35 -> 39 | -0.18111 |       |            |        | min(4)=                           | 31 -> 48 | -0.03759 |  |  |  |
|    |            | min(3)=                           | 36 -> 52 | -0.08849 |       |            |        | min(5)=                           | 36 -> 48 | -0.03572 |  |  |  |
|    |            | min(4)=                           | 31 -> 37 | -0.07197 |       |            |        | #CIs=2971 #CIs>0=1234 #CIs<0=1235 |          |          |  |  |  |
|    |            | min(5)=                           | 31 -> 38 | -0.05881 |       |            |        |                                   |          |          |  |  |  |
|    |            | #CIs=2984 #CIs>0=1376 #CIs<0=1313 |          |          | 13    | Singlet-A" | 7.0142 | 176.76                            | 0.0019   | 0.000    |  |  |  |
|    |            |                                   |          |          |       |            |        | max(1)=                           | 35 -> 38 | 0.62903  |  |  |  |
| 10 | Singlet-A" | 6.4572                            | 192.01   | 0.1724   | 0.000 |            |        | max(2)=                           | 35 -> 41 | 0.22546  |  |  |  |
|    |            | max(1)=                           | 33 -> 37 | 0.68122  |       |            |        | max(3)=                           | 36 -> 40 | 0.09845  |  |  |  |
|    |            | max(2)=                           | 34 -> 96 | 0.05025  |       |            |        | max(4)=                           | 35 -> 45 | 0.09103  |  |  |  |
|    |            | max(3)=                           | 34 -> 44 | 0.03938  |       |            |        | max(5)=                           | 36 -> 46 | 0.04799  |  |  |  |
|    |            | max(4)=                           | 34 -> 48 | 0.03795  |       |            |        | min(1)=                           | 36 -> 42 | -0.10323 |  |  |  |
|    |            | max(5)=                           | 32 -> 90 | 0.03702  |       |            |        | min(2)=                           | 35 -> 52 | -0.08787 |  |  |  |
|    |            | min(1)=                           | 36 -> 39 | -0.08917 |       |            |        | min(3)=                           | 35 -> 48 | -0.06013 |  |  |  |
|    |            | min(2)=                           | 33 -> 43 | -0.06393 |       |            |        | min(4)=                           | 35 -> 43 | -0.04093 |  |  |  |
|    |            | min(3)=                           | 31 -> 39 | -0.05969 |       |            |        | min(5)=                           | 33 -> 38 | -0.04007 |  |  |  |
|    |            | min(4)=                           | 35 -> 37 | -0.04034 |       |            |        | #CIs=2845 #CIs>0=1093 #CIs<0=1103 |          |          |  |  |  |
|    |            | min(5)=                           | 34 -> 54 | -0.03209 |       |            |        |                                   |          |          |  |  |  |
|    |            | #CIs=2856 #CIs>0=1256 #CIs<0=1264 |          |          | 14    | Singlet-A" | 7.1298 | 173.89                            | 0.0001   | 0.000    |  |  |  |
|    |            |                                   |          |          |       |            |        | max(1)=                           | 36 -> 42 | 0.63959  |  |  |  |
| 11 | Singlet-A' | 6.9434                            | 178.56   | 0.5070   | 0.000 |            |        | max(2)=                           | 36 -> 40 | 0.14774  |  |  |  |
|    |            | max(1)=                           | 35 -> 39 | 0.61556  |       |            |        | max(3)=                           | 35 -> 38 | 0.11679  |  |  |  |
|    |            | max(2)=                           | 31 -> 55 | 0.02354  |       |            |        | max(4)=                           | 36 -> 56 | 0.08620  |  |  |  |
|    |            | max(3)=                           | 36 -> 70 | 0.02034  |       |            |        | max(5)=                           | 35 -> 45 | 0.03191  |  |  |  |
|    |            | max(4)=                           | 27 -> 86 | 0.01854  |       |            |        | min(1)=                           | 36 -> 46 | -0.14068 |  |  |  |
|    |            | max(5)=                           | 36 -> 61 | 0.01844  |       |            |        | min(2)=                           | 35 -> 41 | -0.07388 |  |  |  |
|    |            | min(1)=                           | 36 -> 43 | -0.26399 |       |            |        | min(3)=                           | 31 -> 40 | -0.06385 |  |  |  |
|    |            | min(2)=                           | 31 -> 37 | -0.13989 |       |            |        | min(4)=                           | 35 -> 43 | -0.05714 |  |  |  |
|    |            | min(3)=                           | 36 -> 37 | -0.08901 |       |            |        | min(5)=                           | 36 -> 67 | -0.04713 |  |  |  |
|    |            | min(4)=                           | 36 -> 51 | -0.07876 |       |            |        | #CIs=2837 #CIs>0=1150 #CIs<0=1154 |          |          |  |  |  |
|    |            | min(5)=                           | 31 -> 43 | -0.07366 |       |            |        |                                   |          |          |  |  |  |
|    |            | #CIs=2984 #CIs>0=1274 #CIs<0=1375 |          |          | 15    | Singlet-A" | 7.4100 | 167.32                            | 0.0000   | 0.000    |  |  |  |
|    |            |                                   |          |          |       |            |        | max(1)=                           | 30 -> 37 | 0.67688  |  |  |  |
| 12 | Singlet-A' | 6.9779                            | 177.68   | 0.0040   | 0.000 |            |        | max(2)=                           | 30 -> 43 | 0.10821  |  |  |  |
|    |            | max(1)=                           | 36 -> 44 | 0.51090  |       |            |        | max(3)=                           | 32 -> 39 | 0.08552  |  |  |  |
|    |            | max(2)=                           | 36 -> 45 | 0.42854  |       |            |        | max(4)=                           | 26 -> 37 | 0.08246  |  |  |  |
|    |            | max(3)=                           | 35 -> 40 | 0.11198  |       |            |        | max(5)=                           | 27 -> 37 | 0.05401  |  |  |  |
|    |            | max(4)=                           | 36 -> 65 | 0.05676  |       |            |        | min(1)=                           | 30 -> 47 | -0.05384 |  |  |  |
|    |            | max(5)=                           | 35 -> 53 | 0.03004  |       |            |        | min(2)=                           | 25 -> 39 | -0.04243 |  |  |  |

|    |            |                                   |          |          |       |             |        |                                   |          |          |  |  |
|----|------------|-----------------------------------|----------|----------|-------|-------------|--------|-----------------------------------|----------|----------|--|--|
|    |            | min(3)=                           | 26 -> 43 | -0.03745 |       |             |        | max(4)=                           | 31 -> 41 | 0.08042  |  |  |
|    |            | min(4)=                           | 30 -> 63 | -0.02272 |       |             |        | max(5)=                           | 36 -> 62 | 0.07406  |  |  |
|    |            | min(5)=                           | 30 -> 55 | -0.02160 |       |             |        | min(1)=                           | 36 -> 44 | -0.34822 |  |  |
|    |            | #CIs=2810 #CIs>0=1147 #CIs<0=1170 |          |          |       |             |        | min(2)=                           | 35 -> 40 | -0.17109 |  |  |
| 16 | Singlet-A' | 7.4219                            | 167.05   | 0.0052   | 0.000 |             |        | min(3)=                           | 36 -> 48 | -0.09933 |  |  |
|    |            | max(1)=                           | 34 -> 39 | 0.51139  |       |             |        | min(4)=                           | 36 -> 41 | -0.07089 |  |  |
|    |            | max(2)=                           | 36 -> 43 | 0.13467  |       |             |        | min(5)=                           | 36 -> 38 | -0.06655 |  |  |
|    |            | max(3)=                           | 36 -> 45 | 0.10919  |       |             |        | #CIs=2983 #CIs>0=1352 #CIs<0=1276 |          |          |  |  |
|    |            | max(4)=                           | 29 -> 37 | 0.05526  | 19    | Singlet-A'' | 7.5125 | 165.04                            | 0.1146   | 0.000    |  |  |
|    |            | max(5)=                           | 33 -> 39 | 0.04262  |       |             |        | max(1)=                           | 35 -> 43 | 0.57148  |  |  |
|    |            | min(1)=                           | 31 -> 37 | -0.41041 |       |             |        | max(2)=                           | 35 -> 41 | 0.27311  |  |  |
|    |            | min(2)=                           | 36 -> 44 | -0.07501 |       |             |        | max(3)=                           | 31 -> 39 | 0.17692  |  |  |
|    |            | min(3)=                           | 28 -> 37 | -0.07433 |       |             |        | max(4)=                           | 36 -> 49 | 0.12499  |  |  |
|    |            | min(4)=                           | 35 -> 40 | -0.06690 |       |             |        | max(5)=                           | 36 -> 42 | 0.11060  |  |  |
|    |            | min(5)=                           | 36 -> 37 | -0.05811 |       |             |        | min(1)=                           | 35 -> 38 | -0.05084 |  |  |
|    |            | #CIs=2984 #CIs>0=1365 #CIs<0=1343 |          |          |       |             |        | min(2)=                           | 35 -> 37 | -0.04955 |  |  |
|    |            |                                   |          |          |       |             |        | min(3)=                           | 35 -> 52 | -0.04762 |  |  |
| 17 | Singlet-A' | 7.4309                            | 166.85   | 0.0069   | 0.000 |             |        | min(4)=                           | 31 -> 40 | -0.04005 |  |  |
|    |            | max(1)=                           | 34 -> 39 | 0.47294  |       |             |        | min(5)=                           | 33 -> 43 | -0.03767 |  |  |
|    |            | max(2)=                           | 31 -> 37 | 0.46124  |       |             |        | #CIs=2856 #CIs>0=1268 #CIs<0=1254 |          |          |  |  |
|    |            | max(3)=                           | 36 -> 37 | 0.06585  |       |             |        |                                   |          |          |  |  |
|    |            | max(4)=                           | 36 -> 44 | 0.05242  | 20    | Singlet-A'  | 7.5199 | 164.87                            | 0.0472   | 0.000    |  |  |
|    |            | max(5)=                           | 35 -> 39 | 0.05097  |       |             |        | max(1)=                           | 36 -> 47 | 0.64074  |  |  |
|    |            | min(1)=                           | 36 -> 43 | -0.14697 |       |             |        | max(2)=                           | 35 -> 40 | 0.21820  |  |  |
|    |            | min(2)=                           | 29 -> 37 | -0.09327 |       |             |        | max(3)=                           | 36 -> 44 | 0.07051  |  |  |
|    |            | min(3)=                           | 36 -> 45 | -0.08373 |       |             |        | max(4)=                           | 35 -> 39 | 0.05217  |  |  |
|    |            | min(4)=                           | 33 -> 39 | -0.04826 |       |             |        | max(5)=                           | 36 -> 51 | 0.04827  |  |  |
|    |            | min(5)=                           | 34 -> 40 | -0.03174 |       |             |        | min(1)=                           | 36 -> 45 | -0.10077 |  |  |
|    |            | #CIs=2985 #CIs>0=1388 #CIs<0=1324 |          |          |       |             |        | min(2)=                           | 36 -> 50 | -0.04312 |  |  |
|    |            |                                   |          |          |       |             |        | min(3)=                           | 31 -> 41 | -0.03790 |  |  |
| 18 | Singlet-A' | 7.4595                            | 166.21   | 0.0389   | 0.000 |             |        | min(4)=                           | 31 -> 37 | -0.03734 |  |  |
|    |            | max(1)=                           | 36 -> 45 | 0.47267  |       |             |        | min(5)=                           | 36 -> 52 | -0.02799 |  |  |
|    |            | max(2)=                           | 36 -> 47 | 0.19990  |       |             |        | #CIs=2980 #CIs>0=1355 #CIs<0=1283 |          |          |  |  |
|    |            | max(3)=                           | 31 -> 37 | 0.18109  |       |             |        |                                   |          |          |  |  |

### 16.2.3 Main contributions from different excited states at CIS approach

|          |            |       |               |         |        |             |          |         |        |       |
|----------|------------|-------|---------------|---------|--------|-------------|----------|---------|--------|-------|
| #_exc.st | ___symm___ | Exc.E | Osc._Strength | ___f___ | <S**2> | Singlet-A'' | 5.4601   | 227.07  | 0.0000 | 0.000 |
|          |            |       |               |         |        | max(1)=     | 32 -> 40 | 0.56057 |        |       |

|   |             |                                   |          |          |       |  |             |                                   |          |          |       |  |  |
|---|-------------|-----------------------------------|----------|----------|-------|--|-------------|-----------------------------------|----------|----------|-------|--|--|
|   |             | max(2)=                           | 32 -> 46 | 0.21314  |       |  |             | max(4)=                           | 31 -> 51 | 0.15770  |       |  |  |
|   |             | max(3)=                           | 32 -> 59 | 0.20856  |       |  |             | max(5)=                           | 31 -> 49 | 0.10335  |       |  |  |
|   |             | max(4)=                           | 32 -> 51 | 0.16403  |       |  |             | min(1)=                           | 31 -> 50 | -0.13834 |       |  |  |
|   |             | max(5)=                           | 32 -> 49 | 0.10395  |       |  |             | min(2)=                           | 31 -> 85 | -0.08107 |       |  |  |
|   |             | min(1)=                           | 32 -> 50 | -0.14314 |       |  |             | min(3)=                           | 33 -> 40 | -0.07846 |       |  |  |
|   |             | min(2)=                           | 32 -> 85 | -0.08570 |       |  |             | min(4)=                           | 31 -> 39 | -0.06999 |       |  |  |
|   |             | min(3)=                           | 32 -> 39 | -0.06996 |       |  |             | min(5)=                           | 31 -> 61 | -0.03180 |       |  |  |
|   |             | min(4)=                           | 32 -> 61 | -0.03493 |       |  |             | #CIs=2677 #CIs>0=1235 #CIs<0=1213 |          |          |       |  |  |
|   |             | min(5)=                           | 32 -> 52 | -0.02717 |       |  |             |                                   |          |          |       |  |  |
|   |             | #CIs=2523 #CIs>0=1143 #CIs<0=1128 |          |          | 5     |  | Singlet-A'  | 6.0323                            | 205.53   | 0.0036   | 0.000 |  |  |
|   |             |                                   |          |          |       |  |             | max(1)=                           | 36 -> 37 | 0.62829  |       |  |  |
| 2 | Singlet-A'  | 5.5320                            | 224.12   | 0.3691   | 0.000 |  |             | max(2)=                           | 36 -> 45 | 0.15624  |       |  |  |
|   |             | max(1)=                           | 36 -> 40 | 0.61814  |       |  |             | max(3)=                           | 33 -> 37 | 0.11191  |       |  |  |
|   |             | max(2)=                           | 36 -> 37 | 0.07568  |       |  |             | max(4)=                           | 36 -> 64 | 0.03261  |       |  |  |
|   |             | max(3)=                           | 35 -> 44 | 0.06593  |       |  |             | max(5)=                           | 33 -> 50 | 0.02337  |       |  |  |
|   |             | max(4)=                           | 35 -> 58 | 0.05880  |       |  |             | min(1)=                           | 36 -> 52 | -0.12608 |       |  |  |
|   |             | max(5)=                           | 33 -> 77 | 0.02798  |       |  |             | min(2)=                           | 36 -> 47 | -0.12334 |       |  |  |
|   |             | min(1)=                           | 35 -> 43 | -0.21217 |       |  |             | min(3)=                           | 36 -> 40 | -0.08206 |       |  |  |
|   |             | min(2)=                           | 36 -> 39 | -0.10936 |       |  |             | min(4)=                           | 35 -> 38 | -0.06464 |       |  |  |
|   |             | min(3)=                           | 36 -> 49 | -0.09839 |       |  |             | min(5)=                           | 33 -> 39 | -0.05356 |       |  |  |
|   |             | min(4)=                           | 33 -> 40 | -0.09761 |       |  |             | #CIs=2840 #CIs>0=1304 #CIs<0=1317 |          |          |       |  |  |
|   |             | min(5)=                           | 36 -> 59 | -0.07120 |       |  |             |                                   |          |          |       |  |  |
|   |             | #CIs=2897 #CIs>0=1389 #CIs<0=1383 |          |          | 6     |  | Singlet-A'' | 6.7357                            | 184.07   | 0.0030   | 0.000 |  |  |
|   |             |                                   |          |          |       |  |             | max(1)=                           | 36 -> 38 | 0.60907  |       |  |  |
| 3 | Singlet-A'' | 5.7395                            | 216.02   | 0.0062   | 0.000 |  |             | max(2)=                           | 36 -> 53 | 0.17128  |       |  |  |
|   |             | max(1)=                           | 36 -> 43 | 0.52167  |       |  |             | max(3)=                           | 33 -> 38 | 0.06875  |       |  |  |
|   |             | max(2)=                           | 35 -> 40 | 0.38920  |       |  |             | max(4)=                           | 35 -> 52 | 0.06733  |       |  |  |
|   |             | max(3)=                           | 36 -> 38 | 0.03241  |       |  |             | max(5)=                           | 36 -> 44 | 0.04821  |       |  |  |
|   |             | max(4)=                           | 36 -> 57 | 0.03108  |       |  |             | min(1)=                           | 35 -> 37 | -0.20201 |       |  |  |
|   |             | max(5)=                           | 35 -> 65 | 0.02952  |       |  |             | min(2)=                           | 36 -> 41 | -0.10169 |       |  |  |
|   |             | min(1)=                           | 36 -> 44 | -0.14860 |       |  |             | min(3)=                           | 35 -> 40 | -0.08146 |       |  |  |
|   |             | min(2)=                           | 36 -> 58 | -0.11972 |       |  |             | min(4)=                           | 35 -> 39 | -0.07873 |       |  |  |
|   |             | min(3)=                           | 35 -> 49 | -0.09802 |       |  |             | min(5)=                           | 33 -> 41 | -0.04583 |       |  |  |
|   |             | min(4)=                           | 35 -> 59 | -0.08874 |       |  |             | #CIs=2705 #CIs>0=1281 #CIs<0=1231 |          |          |       |  |  |
|   |             | min(5)=                           | 35 -> 39 | -0.05974 |       |  |             |                                   |          |          |       |  |  |
|   |             | #CIs=2735 #CIs>0=1259 #CIs<0=1311 |          |          | 7     |  | Singlet-A'  | 6.9208                            | 179.15   | 0.0115   | 0.000 |  |  |
|   |             |                                   |          |          |       |  |             | max(1)=                           | 36 -> 39 | 0.62081  |       |  |  |
| 4 | Singlet-A'  | 5.8059                            | 213.55   | 0.0005   | 0.000 |  |             | max(2)=                           | 36 -> 45 | 0.16666  |       |  |  |
|   |             | max(1)=                           | 31 -> 40 | 0.55976  |       |  |             | max(3)=                           | 36 -> 40 | 0.11158  |       |  |  |
|   |             | max(2)=                           | 31 -> 46 | 0.20766  |       |  |             | max(4)=                           | 36 -> 61 | 0.08302  |       |  |  |
|   |             | max(3)=                           | 31 -> 59 | 0.19698  |       |  |             | max(5)=                           | 36 -> 60 | 0.06382  |       |  |  |

|    |            |                                   |          |          |       |            |        |                                   |          |          |
|----|------------|-----------------------------------|----------|----------|-------|------------|--------|-----------------------------------|----------|----------|
|    |            | min(1)=                           | 36 -> 50 | -0.14421 |       |            |        | min(3)=                           | 35 -> 52 | -0.09551 |
|    |            | min(2)=                           | 36 -> 51 | -0.08616 |       |            |        | min(4)=                           | 35 -> 47 | -0.08585 |
|    |            | min(3)=                           | 33 -> 37 | -0.07892 |       |            |        | min(5)=                           | 35 -> 51 | -0.07931 |
|    |            | min(4)=                           | 35 -> 38 | -0.06887 |       |            |        | #CIs=2664 #CIs>0=1220 #CIs<0=1235 |          |          |
|    |            | min(5)=                           | 29 -> 37 | -0.03420 |       |            |        |                                   |          |          |
|    |            | #CIs=2844 #CIs>0=1325 #CIs<0=1322 |          |          | 11    | Singlet-A' | 7.5006 | 165.30                            | 0.0092   | 0.000    |
| 8  | Singlet-A" | 7.0942                            | 174.77   | 0.1002   | 0.000 |            |        | max(1)=                           | 36 -> 45 | 0.45034  |
|    |            | max(1)=                           | 35 -> 40 | 0.47223  |       |            |        | max(2)=                           | 35 -> 38 | 0.26614  |
|    |            | max(2)=                           | 34 -> 40 | 0.28945  |       |            |        | max(3)=                           | 36 -> 52 | 0.12928  |
|    |            | max(3)=                           | 34 -> 46 | 0.09456  |       |            |        | max(4)=                           | 35 -> 53 | 0.08970  |
|    |            | max(4)=                           | 36 -> 38 | 0.07751  |       |            |        | max(5)=                           | 36 -> 64 | 0.08536  |
|    |            | max(5)=                           | 34 -> 59 | 0.07741  |       |            |        | min(1)=                           | 36 -> 42 | -0.34821 |
|    |            | min(1)=                           | 36 -> 43 | -0.33466 |       |            |        | min(2)=                           | 36 -> 39 | -0.10921 |
|    |            | min(2)=                           | 35 -> 39 | -0.10578 |       |            |        | min(3)=                           | 36 -> 37 | -0.09211 |
|    |            | min(3)=                           | 34 -> 50 | -0.05909 |       |            |        | min(4)=                           | 36 -> 46 | -0.09183 |
|    |            | min(4)=                           | 35 -> 46 | -0.04391 |       |            |        | min(5)=                           | 36 -> 50 | -0.07922 |
|    |            | min(5)=                           | 34 -> 39 | -0.03449 |       |            |        | #CIs=2824 #CIs>0=1295 #CIs<0=1307 |          |          |
|    |            | #CIs=2764 #CIs>0=1334 #CIs<0=1311 |          |          | 12    | Singlet-A" | 7.6771 | 161.50                            | 0.4758   | 0.000    |
| 9  | Singlet-A' | 7.3490                            | 168.71   | 0.6163   | 0.000 |            |        | max(1)=                           | 34 -> 40 | 0.44373  |
|    |            | max(1)=                           | 35 -> 43 | 0.46680  |       |            |        | max(2)=                           | 36 -> 43 | 0.17733  |
|    |            | max(2)=                           | 36 -> 46 | 0.32288  |       |            |        | max(3)=                           | 34 -> 46 | 0.12478  |
|    |            | max(3)=                           | 36 -> 40 | 0.18878  |       |            |        | max(4)=                           | 34 -> 59 | 0.10269  |
|    |            | max(4)=                           | 36 -> 49 | 0.18059  |       |            |        | max(5)=                           | 34 -> 49 | 0.09601  |
|    |            | max(5)=                           | 36 -> 59 | 0.13681  |       |            |        | min(1)=                           | 36 -> 41 | -0.29941 |
|    |            | min(1)=                           | 35 -> 44 | -0.13310 |       |            |        | min(2)=                           | 35 -> 40 | -0.18282 |
|    |            | min(2)=                           | 35 -> 58 | -0.09137 |       |            |        | min(3)=                           | 36 -> 38 | -0.11498 |
|    |            | min(3)=                           | 33 -> 40 | -0.08952 |       |            |        | min(4)=                           | 35 -> 37 | -0.10557 |
|    |            | min(4)=                           | 36 -> 39 | -0.05736 |       |            |        | min(5)=                           | 34 -> 50 | -0.08083 |
|    |            | min(5)=                           | 36 -> 50 | -0.05735 |       |            |        | #CIs=2771 #CIs>0=1351 #CIs<0=1304 |          |          |
|    |            | #CIs=2892 #CIs>0=1373 #CIs<0=1399 |          |          | 13    | Singlet-A" | 7.7719 | 159.53                            | 0.2152   | 0.000    |
| 10 | Singlet-A" | 7.4772                            | 165.82   | 0.0000   | 0.000 |            |        | max(1)=                           | 36 -> 41 | 0.52931  |
|    |            | max(1)=                           | 35 -> 37 | 0.50125  |       |            |        | max(2)=                           | 34 -> 40 | 0.24608  |
|    |            | max(2)=                           | 35 -> 39 | 0.31202  |       |            |        | max(3)=                           | 36 -> 38 | 0.14201  |
|    |            | max(3)=                           | 36 -> 38 | 0.20028  |       |            |        | max(4)=                           | 36 -> 43 | 0.12393  |
|    |            | max(4)=                           | 35 -> 45 | 0.15582  |       |            |        | max(5)=                           | 35 -> 37 | 0.10787  |
|    |            | max(5)=                           | 36 -> 44 | 0.08418  |       |            |        | min(1)=                           | 35 -> 40 | -0.16573 |
|    |            | min(1)=                           | 36 -> 41 | -0.13539 |       |            |        | min(2)=                           | 36 -> 44 | -0.14958 |
|    |            | min(2)=                           | 35 -> 50 | -0.11241 |       |            |        | min(3)=                           | 33 -> 38 | -0.06021 |
|    |            |                                   |          |          |       |            |        | min(4)=                           | 33 -> 44 | -0.05106 |

|    |            |        |           |             |             |       |             |             |             |          |       |
|----|------------|--------|-----------|-------------|-------------|-------|-------------|-------------|-------------|----------|-------|
|    |            |        | min(5)=   | 36 -> 68    | -0.05081    |       |             |             |             |          |       |
|    |            |        | #CIs=2772 | #CIs>0=1318 | #CIs<0=1328 | 17    | Singlet-A'  | 8.2644      | 150.02      | 0.2966   | 0.000 |
|    |            |        |           |             |             |       | max(1)=     | 35 -> 43    |             | 0.20136  |       |
| 14 | Singlet-A' | 7.7816 |           | 159.33      | 0.2110      | 0.000 | max(2)=     | 33 -> 40    |             | 0.19315  |       |
|    |            |        | max(1)=   | 36 -> 46    | 0.50483     |       | max(3)=     | 36 -> 46    |             | 0.16526  |       |
|    |            |        | max(2)=   | 36 -> 45    | 0.20155     |       | max(4)=     | 36 -> 50    |             | 0.10622  |       |
|    |            |        | max(3)=   | 36 -> 42    | 0.12923     |       | max(5)=     | 36 -> 45    |             | 0.05643  |       |
|    |            |        | max(4)=   | 35 -> 44    | 0.09358     |       | min(1)=     | 36 -> 49    |             | -0.54999 |       |
|    |            |        | max(5)=   | 35 -> 48    | 0.08210     |       | min(2)=     | 36 -> 59    |             | -0.16457 |       |
|    |            |        | min(1)=   | 35 -> 43    | -0.29792    |       | min(3)=     | 36 -> 51    |             | -0.13190 |       |
|    |            |        | min(2)=   | 36 -> 40    | -0.14992    |       | min(4)=     | 35 -> 44    |             | -0.05889 |       |
|    |            |        | min(3)=   | 33 -> 40    | -0.13218    |       | min(5)=     | 29 -> 40    |             | -0.04521 |       |
|    |            |        | min(4)=   | 36 -> 51    | -0.06724    |       | #CIs=2885   | #CIs>0=1381 | #CIs<0=1352 |          |       |
|    |            |        | min(5)=   | 36 -> 47    | -0.05133    |       |             |             |             |          |       |
|    |            |        | #CIs=2891 | #CIs>0=1357 | #CIs<0=1385 | 18    | Singlet-A'' | 8.2945      | 149.48      | 0.0011   | 0.000 |
|    |            |        |           |             |             |       | max(1)=     | 35 -> 39    |             | 0.51715  |       |
| 15 | Singlet-A' | 7.9885 |           | 155.20      | 0.0398      | 0.000 | max(2)=     | 35 -> 40    |             | 0.13513  |       |
|    |            |        | max(1)=   | 35 -> 38    | 0.53063     |       | max(3)=     | 36 -> 41    |             | 0.13071  |       |
|    |            |        | max(2)=   | 36 -> 37    | 0.16237     |       | max(4)=     | 35 -> 61    |             | 0.06443  |       |
|    |            |        | max(3)=   | 35 -> 53    | 0.15578     |       | max(5)=     | 35 -> 47    |             | 0.06388  |       |
|    |            |        | max(4)=   | 36 -> 39    | 0.14934     |       | min(1)=     | 35 -> 37    |             | -0.34594 |       |
|    |            |        | max(5)=   | 36 -> 46    | 0.11778     |       | min(2)=     | 35 -> 42    |             | -0.14199 |       |
|    |            |        | min(1)=   | 36 -> 45    | -0.28426    |       | min(3)=     | 35 -> 50    |             | -0.13977 |       |
|    |            |        | min(2)=   | 33 -> 39    | -0.06547    |       | min(4)=     | 35 -> 51    |             | -0.10355 |       |
|    |            |        | min(3)=   | 36 -> 42    | -0.06364    |       | min(5)=     | 33 -> 38    |             | -0.03193 |       |
|    |            |        | min(4)=   | 36 -> 62    | -0.05141    |       | #CIs=2716   | #CIs>0=1269 | #CIs<0=1260 |          |       |
|    |            |        | min(5)=   | 33 -> 37    | -0.03875    |       |             |             |             |          |       |
|    |            |        | #CIs=2783 | #CIs>0=1290 | #CIs<0=1260 | 19    | Singlet-A'' | 8.5058      | 145.76      | 0.0033   | 0.000 |
|    |            |        |           |             |             |       | max(1)=     | 35 -> 45    |             | 0.49950  |       |
| 16 | Singlet-A' | 8.1699 |           | 151.76      | 0.0072      | 0.000 | max(2)=     | 35 -> 52    |             | 0.14012  |       |
|    |            |        | max(1)=   | 36 -> 42    | 0.51288     |       | max(3)=     | 35 -> 56    |             | 0.10254  |       |
|    |            |        | max(2)=   | 35 -> 38    | 0.24333     |       | max(4)=     | 35 -> 64    |             | 0.07537  |       |
|    |            |        | max(3)=   | 36 -> 45    | 0.19098     |       | max(5)=     | 35 -> 65    |             | 0.06999  |       |
|    |            |        | max(4)=   | 35 -> 41    | 0.08936     |       | min(1)=     | 35 -> 42    |             | -0.27621 |       |
|    |            |        | max(5)=   | 36 -> 62    | 0.07853     |       | min(2)=     | 36 -> 44    |             | -0.19296 |       |
|    |            |        | min(1)=   | 36 -> 46    | -0.20932    |       | min(3)=     | 35 -> 46    |             | -0.13266 |       |
|    |            |        | min(2)=   | 36 -> 47    | -0.19989    |       | min(4)=     | 35 -> 39    |             | -0.12101 |       |
|    |            |        | min(3)=   | 36 -> 37    | -0.05265    |       | min(5)=     | 36 -> 41    |             | -0.08612 |       |
|    |            |        | min(4)=   | 36 -> 67    | -0.04304    |       | #CIs=2733   | #CIs>0=1252 | #CIs<0=1299 |          |       |
|    |            |        | min(5)=   | 36 -> 65    | -0.03742    |       |             |             |             |          |       |
|    |            |        | #CIs=2826 | #CIs>0=1303 | #CIs<0=1307 | 20    | Singlet-A'' | 8.7087      | 142.37      | 0.0164   | 0.000 |

|         |          |          |                                   |          |          |
|---------|----------|----------|-----------------------------------|----------|----------|
| max(1)= | 36 -> 44 | 0.39478  | min(2)=                           | 34 -> 40 | -0.05794 |
| max(2)= | 36 -> 48 | 0.37400  | min(3)=                           | 36 -> 38 | -0.05773 |
| max(3)= | 35 -> 45 | 0.25623  | min(4)=                           | 36 -> 75 | -0.04844 |
| max(4)= | 35 -> 46 | 0.22651  | min(5)=                           | 35 -> 69 | -0.03570 |
| max(5)= | 36 -> 41 | 0.10705  | #CIs=2770 #CIs>0=1307 #CIs<0=1315 |          |          |
| min(1)= | 35 -> 39 | -0.10682 |                                   |          |          |



# 17 *m*-nitroaniline

## 17.1 6-311G(d,p)

### 17.1.1 Plots

Figure S29: For *m*-nitroaniline molecule and 6-311G(d,p) basis set, variation of  $\alpha_{ZZ}$  (top) and  $\beta_{ZZZ}$  (middle) with respect to the number of orbitals (FIOs decomposition presented in this work, in Plots S29a and ??) or states (SOS approaches, in Plots S29b and ??). For  $\alpha$  FIOs, three approaches were considered: CPKS, CPHF and UPHF. For  $\beta$  FIOs, the results of CPKS and CPHF approaches are provided. Besides, a shorten range of number of orbitals/states can be seen in Plots S29c and ?? as well (bottom). All elements of the  $\beta$  tensor were recomputed with an error less than 0.10 au in the case of the FIOs. For SOS approach, TDDFT (CAM-B3LYP) and CIS methods were employed. Recomputed values of  $\alpha_{ZZ}$  and  $\beta_{ZZZ}$  for the different approaches are included in each plot. HOMO (H) and LUMO (L) are represented by blue and pink dotted lines, respectively.

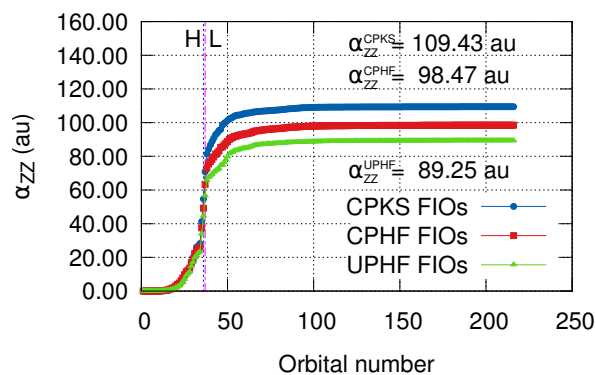

(a) CPKS-, CPHF- and UPHF-FIOs decomposition of  $\alpha_{ZZ}$  into MOs.

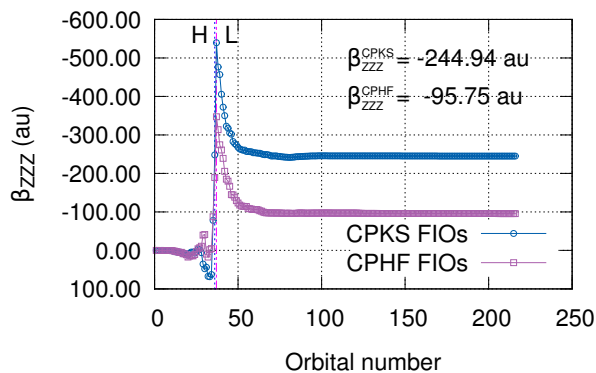

(b) CPKS- and CPHF-FIOs decomposition of  $\beta_{ZZZ}$  into MOs.

Figure S29: (continued) For *m*-nitroaniline molecule and 6-311G(d,p) basis set, variation of  $\alpha_{ZZ}$  (top) and  $\beta_{ZZZ}$  (middle) with respect to the number of orbitals (FIOs decomposition presented in this work, in Plots S29a and ??) or states (SOS approaches, in Plots S29b and ??). For  $\alpha$  FIOs, three approaches were considered: CPKS, CPHF and UPHF. For  $\beta$  FIOs, the results of CPKS and CPHF approaches are provided. Besides, a shorten range of number of orbitals/states can be seen in Plots S29c and ?? as well (bottom). All elements of the  $\beta$  tensor were recomputed with an error less than 0.37 au in the case of the FIOs. For SOS approach, TDDFT (CAM-B3LYP) and CIS methods were employed. Recomputed values of  $\alpha_{ZZ}$  and  $\beta_{ZZZ}$  for the different approaches are included in each plot. HOMO (H) and LUMO (L) are represented by blue and pink dotted lines, respectively.

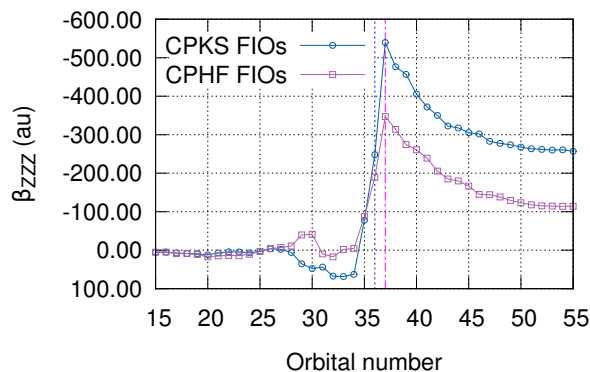

(c) CPKS- and CPHF-FIOs decomposition of  $\beta_{ZZZ}$  between MOs 15 and 55.

# 18 *p*-methoxy-nitrobenzene

## 18.1 6-311G(d,p)

### 18.1.1 Plots

Figure S30: For *p*-methoxy-nitrobenzene molecule and 6-311G(d,p) basis set, variation of  $\alpha_{ZZ}$  (top) and  $\beta_{ZZZ}$  (middle) with respect to the number of orbitals (FIOs decomposition presented in this work, in Plots S30a and S30b) or states (SOS approaches, in Plots S30c and S30d). For  $\alpha$  FIOs, three approaches were considered: CPKS, CPHF and UPHF. For  $\beta$  FIOs, the results of CPKS and CPHF approaches are provided. Besides, a shorten range of number of orbitals/states can be seen in Plots S30e and S30f as well (bottom). All elements of the  $\beta$  tensor were recomputed with an error less than 0.51 au in the case of the FIOs. For SOS approach, TDDFT (CAM-B3LYP) and CIS methods were employed. Recomputed values of  $\alpha_{ZZ}$  and  $\beta_{ZZZ}$  for the different approaches are included in each plot. HOMO (H) and LUMO (L) are represented by blue and pink dotted lines, respectively.

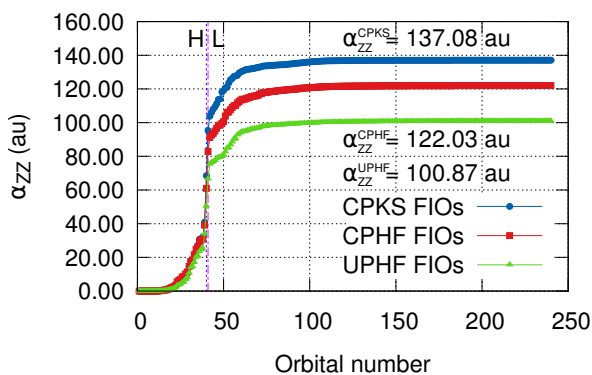

(a) CPKS-, CPHF- and UPHF-FIOs decomposition of  $\alpha_{ZZ}$  into MOs.

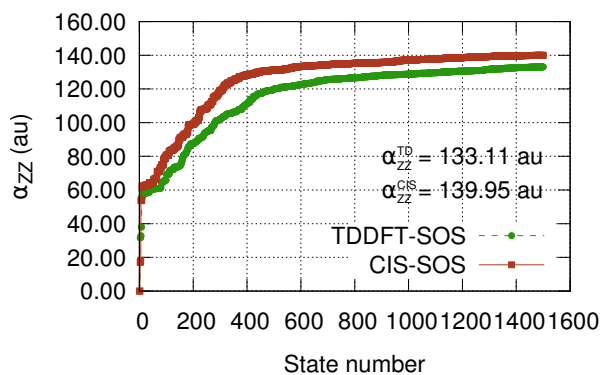

(b) TDDFT- and CIS-SOS decomposition of  $\alpha_{ZZ}$  into states.

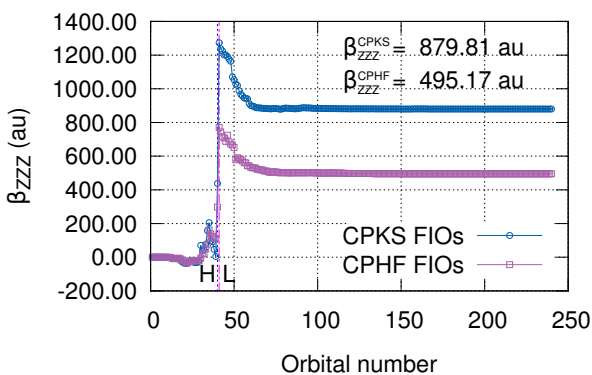

(c) CPKS- and CPHF-FIOs decomposition of  $\beta_{ZZZ}$  into MOs.

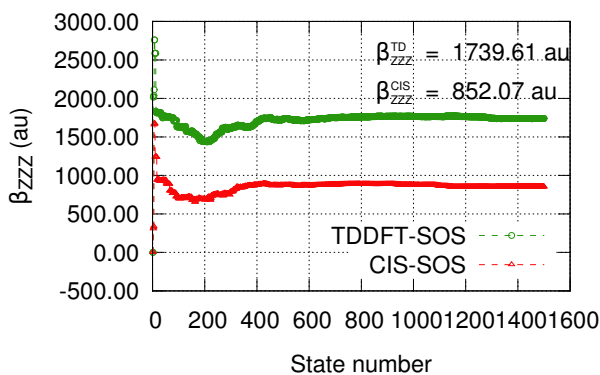

(d) TDDFT- and CIS-SOS decomposition of  $\beta_{ZZZ}$  into states.

Figure S30: (continued) For *p*-methoxy-nitrobenzene molecule and 6-311G(d,p) basis set, variation of  $\alpha_{ZZ}$  (top) and  $\beta_{ZZZ}$  (middle) with respect to the number of orbitals (FIOs decomposition presented in this work, in Plots S30a and S30b) or states (SOS approaches, in Plots S30c and S30d). For  $\alpha$  FIOs, three approaches were considered: CPKS, CPHF and UPHF. For  $\beta$  FIOs, the results of CPKS and CPHF approaches are provided. Besides, a shorten range of number of orbitals/states can be seen in Plots S30e and S30f as well (bottom). All elements of the  $\beta$  tensor were recomputed with an error less than 0.51 au in the case of the FIOs. For SOS approach, TDDFT (CAM-B3LYP) and CIS methods were employed. Recomputed values of  $\alpha_{ZZ}$  and  $\beta_{ZZZ}$  for the different approaches are included in each plot. HOMO (H) and LUMO (L) are represented by blue and pink dotted lines, respectively.

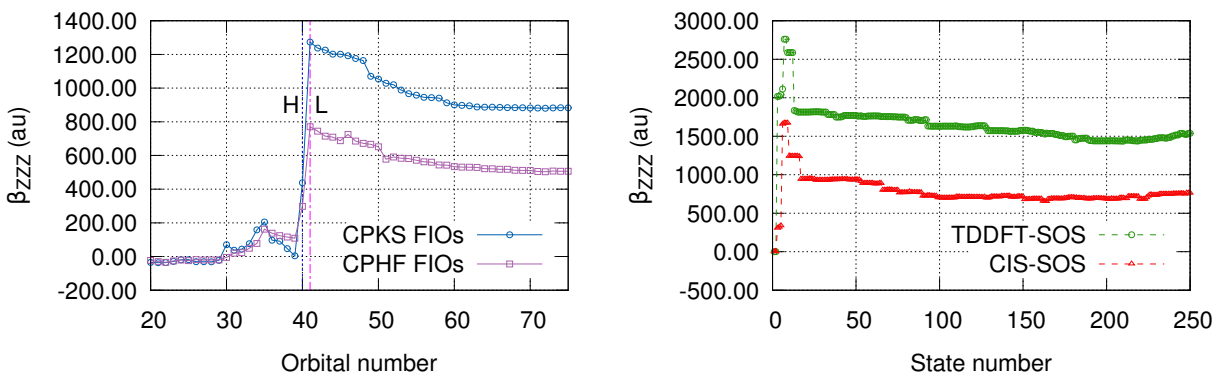

(e) CPKS- and CPHF-FIOs decomposition of  $\beta_{ZZZ}$  between MOs 20 and 70. (f) TDDFT- and CIS-SOS decomposition of  $\beta_{ZZZ}$  between states 1 and 250.

### 18.1.2 Main contributions from different excited states at TDDFT (CAM-B3LYP) approach

| #_exc.st | __symm__   | Exc.E    | Osc._Strength | __f__  | <S**2> | #CIs=2265  | #CIs>0=849 | #CIs<0=819 |        |       |
|----------|------------|----------|---------------|--------|--------|------------|------------|------------|--------|-------|
| 1        | Singlet-A" | 4.1023   | 302.23        | 0.0000 | 0.000  | Singlet-A" | 4.6149     | 268.66     | 0.0001 | 0.000 |
|          | max(1)=    | 38 -> 41 | 0.67368       |        |        | max(1)=    | 36 -> 41   | 0.67564    |        |       |
|          | max(2)=    | 38 -> 42 | 0.02078       |        |        | max(2)=    | 36 -> 42   | 0.01993    |        |       |
|          | max(3)=    | 30 -> 41 | 0.01671       |        |        | max(3)=    | 31 -> 43   | 0.01869    |        |       |
|          | max(4)=    | 35 -> 43 | 0.01198       |        |        | max(4)=    | 28 -> 43   | 0.01613    |        |       |
|          | max(5)=    | 29 -> 41 | 0.00843       |        |        | max(5)=    | 29 -> 41   | 0.01013    |        |       |
|          | min(1)=    | 38 -> 43 | -0.20915      |        |        | min(1)=    | 36 -> 43   | -0.20131   |        |       |
|          | min(2)=    | 38 -> 52 | -0.02528      |        |        | min(2)=    | 31 -> 41   | -0.02534   |        |       |
|          | min(3)=    | 35 -> 41 | -0.02455      |        |        | min(3)=    | 36 -> 52   | -0.02263   |        |       |
|          | min(4)=    | 30 -> 43 | -0.01284      |        |        | min(4)=    | 28 -> 41   | -0.01770   |        |       |
|          | min(5)=    | 38 ->101 | -0.01049      |        |        | min(5)=    | 30 -> 41   | -0.01316   |        |       |

|   |            |                                   |          |             |          |        |          |       |
|---|------------|-----------------------------------|----------|-------------|----------|--------|----------|-------|
|   |            | #CIs=2276 #CIs>0=921 #CIs<0=901   | 6        | Singlet-A'  | 6.7020   | 185.00 | 0.1597   | 0.000 |
|   |            |                                   |          | max(1)=     | 37 -> 41 |        | 0.63153  |       |
| 3 | Singlet-A' | 4.8366 256.35 0.3324              | 0.000    | max(2)=     | 40 -> 43 |        | 0.15679  |       |
|   |            | max(1)= 40 -> 41                  | 0.68850  | max(3)=     | 34 -> 41 |        | 0.05029  |       |
|   |            | max(2)= 34 -> 43                  | 0.04889  | max(4)=     | 39 -> 41 |        | 0.03565  |       |
|   |            | max(3)= 32 -> 41                  | 0.02924  | max(5)=     | 38 -> 62 |        | 0.02688  |       |
|   |            | max(4)= 36 -> 53                  | 0.01721  | min(1)=     | 39 -> 42 |        | -0.20550 |       |
|   |            | max(5)= 38 -> 51                  | 0.01583  | min(2)=     | 40 -> 42 |        | -0.11877 |       |
|   |            | min(1)= 39 -> 42                  | -0.10676 | min(3)=     | 39 -> 43 |        | -0.05829 |       |
|   |            | min(2)= 34 -> 41                  | -0.09180 | min(4)=     | 38 -> 57 |        | -0.05788 |       |
|   |            | min(3)= 32 -> 43                  | -0.02268 | min(5)=     | 34 -> 42 |        | -0.04164 |       |
|   |            | min(4)= 36 -> 45                  | -0.01367 |             |          |        |          |       |
|   |            | min(5)= 35 -> 56                  | -0.01241 |             |          |        |          |       |
|   |            | #CIs=3510 #CIs>0=1483 #CIs<0=1566 | 7        | Singlet-A'  | 6.7415   | 183.91 | 0.1247   | 0.000 |
|   |            |                                   |          | max(1)=     | 39 -> 42 |        | 0.50139  |       |
| 4 | Singlet-A' | 5.0828 243.93 0.0011              | 0.000    | max(2)=     | 37 -> 41 |        | 0.26366  |       |
|   |            | max(1)= 39 -> 41                  | 0.52452  | max(3)=     | 40 -> 41 |        | 0.06912  |       |
|   |            | max(2)= 40 -> 42                  | 0.45028  | max(4)=     | 32 -> 41 |        | 0.05114  |       |
|   |            | max(3)= 39 -> 43                  | 0.12534  | max(5)=     | 34 -> 43 |        | 0.04716  |       |
|   |            | max(4)= 37 -> 41                  | 0.05425  | min(1)=     | 40 -> 43 |        | -0.38820 |       |
|   |            | max(5)= 40 -> 43                  | 0.01601  | min(2)=     | 34 -> 41 |        | -0.09085 |       |
|   |            | min(1)= 34 -> 42                  | -0.04868 | min(3)=     | 39 -> 43 |        | -0.03049 |       |
|   |            | min(2)= 39 -> 42                  | -0.01687 | min(4)=     | 38 -> 57 |        | -0.02533 |       |
|   |            | min(3)= 39 -> 48                  | -0.01053 | min(5)=     | 40 -> 42 |        | -0.01811 |       |
|   |            | min(4)= 40 -> 41                  | -0.00987 |             |          |        |          |       |
|   |            | min(5)= 39 -> 76                  | -0.00756 |             |          |        |          |       |
|   |            | #CIs=3497 #CIs>0=1444 #CIs<0=1530 | 8        | Singlet-A'' | 7.2821   | 170.26 | 0.0000   | 0.000 |
|   |            |                                   |          | max(1)=     | 35 -> 41 |        | 0.61418  |       |
| 5 | Singlet-A' | 5.9952 206.81 0.0892              | 0.000    | max(2)=     | 35 -> 43 |        | 0.17491  |       |
|   |            | max(1)= 40 -> 42                  | 0.49975  | max(3)=     | 38 -> 43 |        | 0.04769  |       |
|   |            | max(2)= 37 -> 41                  | 0.12410  | max(4)=     | 38 -> 41 |        | 0.03530  |       |
|   |            | max(3)= 39 -> 43                  | 0.11675  | max(5)=     | 29 -> 43 |        | 0.03053  |       |
|   |            | max(4)= 32 -> 41                  | 0.01387  | min(1)=     | 33 -> 41 |        | -0.26577 |       |
|   |            | max(5)= 38 -> 45                  | 0.01105  | min(2)=     | 29 -> 41 |        | -0.05835 |       |
|   |            | min(1)= 39 -> 41                  | -0.46933 | min(3)=     | 36 -> 42 |        | -0.05006 |       |
|   |            | min(2)= 39 -> 42                  | -0.02469 | min(4)=     | 31 -> 41 |        | -0.04116 |       |
|   |            | min(3)= 34 -> 41                  | -0.01961 | min(5)=     | 38 -> 42 |        | -0.03996 |       |
|   |            | min(4)= 39 -> 64                  | -0.01757 |             |          |        |          |       |
|   |            | min(5)= 38 -> 57                  | -0.01691 |             |          |        |          |       |
|   |            | #CIs=3508 #CIs>0=1542 #CIs<0=1489 | 9        | Singlet-A'  | 7.3195   | 169.39 | 0.4348   | 0.000 |
|   |            |                                   |          | max(1)=     | 40 -> 43 |        | 0.47634  |       |





| #_exc.st | __symm__   | Exc.E        | Osc._Strength  | __f__          | _ <del>S</del> *2>_ | Singlet-A'   | 6.0167         | 206.07         | 0.0085   | 0.000 |
|----------|------------|--------------|----------------|----------------|---------------------|--------------|----------------|----------------|----------|-------|
| 1        | Singlet-A" | 5.4890       | 225.88         | 0.0000         | 0.000               |              |                |                |          |       |
|          |            | max(1)=      | 37 -> 41       | 0.58235        |                     | max(1)=      | 40 -> 42       |                | 0.48970  |       |
|          |            | max(2)=      | 37 -> 46       | 0.36535        |                     | max(2)=      | 39 -> 41       |                | 0.46178  |       |
|          |            | max(3)=      | 37 ->101       | 0.04189        |                     | max(3)=      | 40 -> 41       |                | 0.11220  |       |
|          |            | max(4)=      | 37 -> 42       | 0.03832        |                     | max(4)=      | 39 -> 48       |                | 0.03575  |       |
|          |            | max(5)=      | 30 -> 41       | 0.03673        |                     | max(5)=      | 32 -> 42       |                | 0.02833  |       |
|          |            | min(1)=      | 34 -> 41       | -0.07416       |                     | min(1)=      | 39 -> 46       |                | -0.14255 |       |
|          |            | min(2)=      | 37 -> 53       | -0.07198       |                     | min(2)=      | 39 -> 42       |                | -0.06232 |       |
|          |            | min(3)=      | 34 -> 46       | -0.05147       |                     | min(3)=      | 40 -> 46       |                | -0.03830 |       |
|          |            | min(4)=      | 36 -> 41       | -0.03624       |                     | min(4)=      | 35 -> 42       |                | -0.03114 |       |
|          |            | min(5)=      | 36 -> 98       | -0.02687       |                     | min(5)=      | 40 -> 48       |                | -0.02249 |       |
|          |            | #states=840  | #states>0=400  | #states<0=440  | 5                   | #states=1870 | #states>0=949  | #states<0=921  |          |       |
|          |            |              |                |                |                     | Singlet-A'   | 7.5232         | 164.80         | 0.0663   | 0.000 |
|          |            | max(1)=      | 38 -> 41       |                |                     | max(1)=      | 38 -> 41       |                | 0.39897  |       |
| 2        | Singlet-A" | 5.8145       | 213.23         | 0.0001         | 0.000               | max(2)=      | 40 -> 42       |                | 0.35179  |       |
|          |            | max(1)=      | 36 -> 41       | 0.59144        |                     | max(3)=      | 38 -> 46       |                | 0.19531  |       |
|          |            | max(2)=      | 36 -> 46       | 0.35599        |                     | max(4)=      | 36 -> 58       |                | 0.02875  |       |
|          |            | max(3)=      | 28 -> 46       | 0.03825        |                     | max(5)=      | 37 -> 87       |                | 0.02740  |       |
|          |            | max(4)=      | 36 ->101       | 0.03774        |                     | min(1)=      | 39 -> 41       |                | -0.38865 |       |
|          |            | max(5)=      | 36 -> 42       | 0.03751        |                     | min(2)=      | 37 -> 59       |                | -0.04054 |       |
|          |            | min(1)=      | 36 -> 53       | -0.06488       |                     | min(3)=      | 35 -> 42       |                | -0.03109 |       |
|          |            | min(2)=      | 31 -> 41       | -0.04925       |                     | min(4)=      | 37 -> 73       |                | -0.02368 |       |
|          |            | min(3)=      | 31 -> 46       | -0.04465       |                     | min(5)=      | 37 -> 66       |                | -0.02301 |       |
|          |            | min(4)=      | 37 -> 98       | -0.02842       |                     | #states=2181 | #states>0=1077 | #states<0=1104 |          |       |
|          |            | min(5)=      | 30 -> 41       | -0.02690       |                     |              |                |                |          |       |
|          |            | #states=1029 | #states>0=512  | #states<0=517  | 6                   |              |                |                |          |       |
|          |            |              |                |                |                     | Singlet-A'   | 7.6657         | 161.74         | 0.9391   | 0.000 |
|          |            | max(1)=      | 39 -> 42       |                |                     | max(1)=      | 39 -> 42       |                | 0.56871  |       |
| 3        | Singlet-A' | 5.8919       | 210.43         | 0.2659         | 0.000               | max(2)=      | 40 -> 41       |                | 0.27636  |       |
|          |            | max(1)=      | 40 -> 41       | 0.61052        |                     | max(3)=      | 40 -> 46       |                | 0.22247  |       |
|          |            | max(2)=      | 39 -> 46       | 0.03767        |                     | max(4)=      | 40 -> 42       |                | 0.06229  |       |
|          |            | max(3)=      | 40 -> 48       | 0.02787        |                     | max(5)=      | 32 -> 53       |                | 0.04479  |       |
|          |            | max(4)=      | 39 -> 48       | 0.01468        |                     | min(1)=      | 38 -> 41       |                | -0.08592 |       |
|          |            | max(5)=      | 32 -> 48       | 0.01378        |                     | min(2)=      | 35 -> 46       |                | -0.07240 |       |
|          |            | min(1)=      | 39 -> 42       | -0.27165       |                     | min(3)=      | 35 -> 41       |                | -0.05075 |       |
|          |            | min(2)=      | 35 -> 41       | -0.09381       |                     | min(4)=      | 39 -> 41       |                | -0.04565 |       |
|          |            | min(3)=      | 39 -> 41       | -0.09099       |                     | min(5)=      | 32 -> 41       |                | -0.03974 |       |
|          |            | min(4)=      | 40 -> 42       | -0.09079       |                     | #states=2143 | #states>0=1087 | #states<0=1056 |          |       |
|          |            | min(5)=      | 40 -> 46       | -0.08810       |                     |              |                |                |          |       |
|          |            | #states=2172 | #states>0=1083 | #states<0=1089 |                     | Singlet-A'   | 8.1377         | 152.36         | 0.8699   | 0.000 |
|          |            |              |                |                |                     | max(1)=      | 38 -> 41       |                | 0.46251  |       |



|    |            |         |                                             |          |       |            |          |          |                                            |
|----|------------|---------|---------------------------------------------|----------|-------|------------|----------|----------|--------------------------------------------|
|    |            | max(2)= | 39 -> 41                                    | 0.31719  |       | max(4)=    | 39 -> 41 | 0.02131  |                                            |
|    |            | max(3)= | 38 -> 46                                    | 0.19474  |       | max(5)=    | 34 -> 43 | 0.02061  |                                            |
|    |            | max(4)= | 39 -> 42                                    | 0.10510  |       | min(1)=    | 35 -> 41 | -0.29035 |                                            |
|    |            | max(5)= | 40 -> 41                                    | 0.06137  |       | min(2)=    | 39 -> 42 | -0.21885 |                                            |
|    |            | min(1)= | 40 -> 42                                    | -0.31141 |       | min(3)=    | 32 -> 41 | -0.11058 |                                            |
|    |            | min(2)= | 37 -> 59                                    | -0.04261 |       | min(4)=    | 40 -> 41 | -0.05291 |                                            |
|    |            | min(3)= | 37 -> 66                                    | -0.02771 |       | min(5)=    | 40 -> 48 | -0.04139 |                                            |
|    |            | min(4)= | 37 -> 65                                    | -0.02510 |       |            |          |          | #states=2135 #states>0=1117 #states<0=1018 |
|    |            | min(5)= | 37 -> 73                                    | -0.02424 |       |            |          |          |                                            |
|    |            |         | #states=2171 #states>0=1072 #states<0=1099  |          |       | Singlet-A" | 9.2454   | 134.10   | 0.0001 0.000                               |
| 8  | Singlet-A" | 8.6473  | 143.38                                      | 0.0227   | 0.000 | max(1)=    | 34 -> 41 | 0.56076  |                                            |
|    |            | max(1)= | 40 -> 43                                    | 0.54002  |       | max(2)=    | 37 -> 41 | 0.08002  |                                            |
|    |            | max(2)= | 35 -> 43                                    | 0.08322  |       | max(3)=    | 33 -> 46 | 0.06566  |                                            |
|    |            | max(3)= | 39 -> 50                                    | 0.07128  |       | max(4)=    | 28 -> 42 | 0.06094  |                                            |
|    |            | max(4)= | 40 -> 52                                    | 0.06277  |       | max(5)=    | 34 -> 48 | 0.05118  |                                            |
|    |            | max(5)= | 40 -> 45                                    | 0.04883  |       | min(1)=    | 33 -> 41 | -0.26131 |                                            |
|    |            | min(1)= | 40 -> 44                                    | -0.29367 |       | min(2)=    | 34 -> 46 | -0.22610 |                                            |
|    |            | min(2)= | 39 -> 43                                    | -0.22191 |       | min(3)=    | 29 -> 53 | -0.08083 |                                            |
|    |            | min(3)= | 39 -> 45                                    | -0.16523 |       | min(4)=    | 29 -> 41 | -0.05940 |                                            |
|    |            | min(4)= | 40 -> 50                                    | -0.06307 |       | min(5)=    | 36 -> 42 | -0.05801 |                                            |
|    |            | min(5)= | 40 -> 55                                    | -0.03921 |       |            |          |          | #states=1266 #states>0=644 #states<0=622   |
|    |            |         | #states=1095 #states>0=593 #states<0=502 12 |          |       | Singlet-A" | 9.5991   | 129.16   | 0.0005 0.000                               |
| 9  | Singlet-A" | 8.9099  | 139.15                                      | 0.0001   | 0.000 | max(1)=    | 40 -> 43 | 0.36726  |                                            |
|    |            | max(1)= | 39 -> 43                                    | 0.38454  |       | max(2)=    | 40 -> 44 | 0.30890  |                                            |
|    |            | max(2)= | 39 -> 52                                    | 0.05471  |       | max(3)=    | 39 -> 45 | 0.26705  |                                            |
|    |            | max(3)= | 39 -> 49                                    | 0.04791  |       | max(4)=    | 39 -> 43 | 0.22991  |                                            |
|    |            | max(4)= | 40 -> 49                                    | 0.04709  |       | max(5)=    | 40 -> 45 | 0.21866  |                                            |
|    |            | max(5)= | 40 -> 50                                    | 0.04512  |       | min(1)=    | 39 -> 44 | -0.13174 |                                            |
|    |            | min(1)= | 39 -> 44                                    | -0.40047 |       | min(2)=    | 39 -> 47 | -0.10809 |                                            |
|    |            | min(2)= | 40 -> 44                                    | -0.29040 |       | min(3)=    | 32 -> 43 | -0.07972 |                                            |
|    |            | min(3)= | 40 -> 45                                    | -0.24405 |       | min(4)=    | 33 -> 42 | -0.06650 |                                            |
|    |            | min(4)= | 35 -> 45                                    | -0.08245 |       | min(5)=    | 35 -> 45 | -0.04637 |                                            |
|    |            | min(5)= | 32 -> 45                                    | -0.07836 |       |            |          |          | #states=1162 #states>0=593 #states<0=569   |
|    |            |         | #states=1023 #states>0=505 #states<0=518 13 |          |       | Singlet-A" | 9.6814   | 128.06   | 0.0502 0.000                               |
| 10 | Singlet-A' | 8.9479  | 138.56                                      | 0.2917   | 0.000 | max(1)=    | 34 -> 42 | 0.33701  |                                            |
|    |            | max(1)= | 40 -> 46                                    | 0.56553  |       | max(2)=    | 39 -> 45 | 0.21689  |                                            |
|    |            | max(2)= | 40 -> 53                                    | 0.05479  |       | max(3)=    | 39 -> 44 | 0.17619  |                                            |
|    |            | max(3)= | 35 -> 53                                    | 0.03614  |       | max(4)=    | 40 -> 45 | 0.16607  |                                            |
|    |            |         |                                             |          |       | max(5)=    | 40 -> 52 | 0.08363  |                                            |

|    |            |                                             |          |          |       |  |  |                                            |          |          |        |       |
|----|------------|---------------------------------------------|----------|----------|-------|--|--|--------------------------------------------|----------|----------|--------|-------|
|    |            | min(1)=                                     | 40 -> 44 | -0.34549 |       |  |  | min(3)=                                    | 29 -> 54 | -0.02023 |        |       |
|    |            | min(2)=                                     | 33 -> 42 | -0.20276 |       |  |  | min(4)=                                    | 35 -> 46 | -0.02008 |        |       |
|    |            | min(3)=                                     | 40 -> 47 | -0.14885 |       |  |  | min(5)=                                    | 30 -> 43 | -0.01738 |        |       |
|    |            | min(4)=                                     | 35 -> 43 | -0.12033 |       |  |  | #states=1891 #states>0=968 #states<0=923   |          |          |        |       |
|    |            | min(5)=                                     | 40 -> 43 | -0.10712 |       |  |  |                                            |          |          |        |       |
|    |            | #states=1286 #states>0=615 #states<0=671 17 |          |          |       |  |  | Singlet-A'                                 | 10.3444  | 119.86   | 0.0320 | 0.000 |
|    |            |                                             |          |          |       |  |  | max(1)=                                    | 35 -> 41 | 0.54493  |        |       |
| 14 | Singlet-A" | 9.7815                                      | 126.75   | 0.0046   | 0.000 |  |  | max(2)=                                    | 40 -> 46 | 0.28334  |        |       |
|    |            | max(1)=                                     | 34 -> 42 | 0.44076  |       |  |  | max(3)=                                    | 32 -> 41 | 0.17849  |        |       |
|    |            | max(2)=                                     | 40 -> 44 | 0.17112  |       |  |  | max(4)=                                    | 40 -> 41 | 0.07830  |        |       |
|    |            | max(3)=                                     | 40 -> 47 | 0.11986  |       |  |  | max(5)=                                    | 24 -> 46 | 0.04531  |        |       |
|    |            | max(4)=                                     | 37 -> 42 | 0.09907  |       |  |  | min(1)=                                    | 35 -> 46 | -0.19056 |        |       |
|    |            | max(5)=                                     | 35 -> 43 | 0.08598  |       |  |  | min(2)=                                    | 39 -> 42 | -0.10950 |        |       |
|    |            | min(1)=                                     | 33 -> 42 | -0.26005 |       |  |  | min(3)=                                    | 40 -> 53 | -0.08082 |        |       |
|    |            | min(2)=                                     | 40 -> 45 | -0.24336 |       |  |  | min(4)=                                    | 35 -> 42 | -0.06437 |        |       |
|    |            | min(3)=                                     | 39 -> 45 | -0.20851 |       |  |  | min(5)=                                    | 39 -> 46 | -0.04269 |        |       |
|    |            | min(4)=                                     | 39 -> 43 | -0.13004 |       |  |  | #states=2101 #states>0=1061 #states<0=1040 |          |          |        |       |
|    |            | min(5)=                                     | 39 -> 44 | -0.07889 |       |  |  |                                            |          |          |        |       |
|    |            | #states=1345 #states>0=688 #states<0=657 18 |          |          |       |  |  | Singlet-A"                                 | 10.4528  | 118.61   | 0.0000 | 0.000 |
|    |            |                                             |          |          |       |  |  | max(1)=                                    | 36 -> 42 | 0.34733  |        |       |
| 15 | Singlet-A" | 10.0305                                     | 123.61   | 0.0001   | 0.000 |  |  | max(2)=                                    | 31 -> 42 | 0.23736  |        |       |
|    |            | max(1)=                                     | 40 -> 45 | 0.45114  |       |  |  | max(3)=                                    | 33 -> 41 | 0.23233  |        |       |
|    |            | max(2)=                                     | 34 -> 42 | 0.06004  |       |  |  | max(4)=                                    | 30 -> 42 | 0.16546  |        |       |
|    |            | max(3)=                                     | 32 -> 43 | 0.05436  |       |  |  | max(5)=                                    | 34 -> 41 | 0.10761  |        |       |
|    |            | max(4)=                                     | 39 -> 52 | 0.05320  |       |  |  | min(1)=                                    | 30 -> 41 | -0.22885 |        |       |
|    |            | max(5)=                                     | 40 -> 44 | 0.03495  |       |  |  | min(2)=                                    | 40 -> 51 | -0.17485 |        |       |
|    |            | min(1)=                                     | 39 -> 45 | -0.29857 |       |  |  | min(3)=                                    | 26 -> 41 | -0.13565 |        |       |
|    |            | min(2)=                                     | 39 -> 44 | -0.28953 |       |  |  | min(4)=                                    | 34 -> 46 | -0.09912 |        |       |
|    |            | min(3)=                                     | 40 -> 51 | -0.15475 |       |  |  | min(5)=                                    | 33 -> 42 | -0.08241 |        |       |
|    |            | min(4)=                                     | 39 -> 49 | -0.13526 |       |  |  | #states=1546 #states>0=775 #states<0=771   |          |          |        |       |
|    |            | min(5)=                                     | 40 -> 43 | -0.12113 |       |  |  |                                            |          |          |        |       |
|    |            | #states=1234 #states>0=603 #states<0=631 19 |          |          |       |  |  | Singlet-A"                                 | 10.5039  | 118.04   | 0.0000 | 0.000 |
|    |            |                                             |          |          |       |  |  | max(1)=                                    | 40 -> 51 | 0.44010  |        |       |
| 16 | Singlet-A' | 10.0659                                     | 123.17   | 0.1781   | 0.000 |  |  | max(2)=                                    | 35 -> 51 | 0.21498  |        |       |
|    |            | max(1)=                                     | 39 -> 46 | 0.62218  |       |  |  | max(3)=                                    | 36 -> 42 | 0.17584  |        |       |
|    |            | max(2)=                                     | 35 -> 42 | 0.21246  |       |  |  | max(4)=                                    | 40 -> 50 | 0.15036  |        |       |
|    |            | max(3)=                                     | 39 -> 41 | 0.10398  |       |  |  | max(5)=                                    | 31 -> 42 | 0.14499  |        |       |
|    |            | max(4)=                                     | 32 -> 42 | 0.09787  |       |  |  | min(1)=                                    | 40 -> 47 | -0.13417 |        |       |
|    |            | max(5)=                                     | 40 -> 42 | 0.09364  |       |  |  | min(2)=                                    | 39 -> 43 | -0.11072 |        |       |
|    |            | min(1)=                                     | 39 -> 48 | -0.08816 |       |  |  | min(3)=                                    | 39 -> 44 | -0.10335 |        |       |
|    |            | min(2)=                                     | 34 -> 43 | -0.02394 |       |  |  | min(4)=                                    | 40 -> 44 | -0.09769 |        |       |

```
min(5)=      35 -> 43      -0.07781      max(5)=      30 -> 41      0.14460
#states=1558 #states>0=761 #states<0=797      min(1)=      33 -> 41      -0.21356
min(2)=      29 -> 42      -0.17358
20 Singlet-A"  10.6873      116.01  0.0008  0.000      min(3)=      30 -> 42      -0.14985
max(1)=      31 -> 42      0.28813      min(4)=      26 -> 42      -0.13181
max(2)=      31 -> 41      0.25985      min(5)=      40 -> 51      -0.10522
max(3)=      37 -> 42      0.25573      #states=1429 #states>0=729 #states<0=700
max(4)=      36 -> 42      0.16339
```

## 18.2 6-311++G(d,p)

### 18.2.1 Plots

Figure S31: For *p*-methoxy-nitrobenzene molecule and 6-311++G(d,p) basis set, variation of  $\alpha_{ZZ}$  (top) and  $\beta_{ZZZ}$  (middle) with respect to the number of orbitals (FIOs decomposition presented in this work, in Plots S31a and S31b) or states (SOS approaches, in Plots S31c and S31d). For  $\alpha$  FIOs, three approaches were considered: CPKS, CPHF and UPHF. For  $\beta$  FIOs, the results of CPKS and CPHF approaches are provided. Besides, a shorten range of number of orbitals/states can be seen in Plots S31e and S31f as well (bottom). All elements of the  $\beta$  tensor were recomputed with an error less than 0.51 au in the case of the FIOs. For SOS approach, TDDFT (CAM-B3LYP) and CIS methods were employed. Recomputed values of  $\alpha_{ZZ}$  and  $\beta_{ZZZ}$  for the different approaches are included in each plot. HOMO (H) and LUMO (L) are represented by blue and pink dotted lines, respectively.

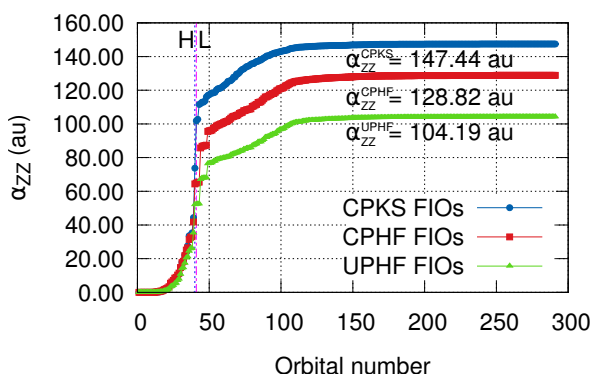

(a) CPKS-, CPHF- and UPHF-FIOs decomposition of  $\alpha_{ZZ}$  into MOs.

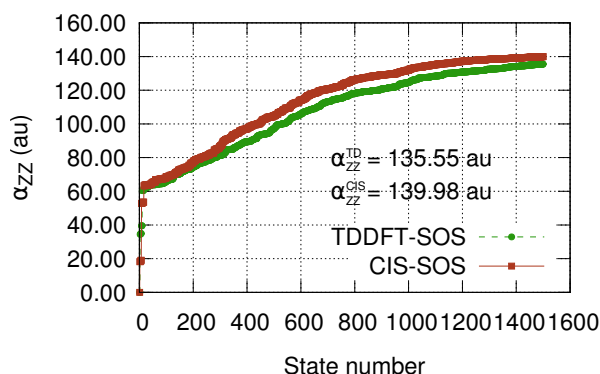

(b) TDDFT- and CIS-SOS decomposition of  $\alpha_{ZZ}$  into states.

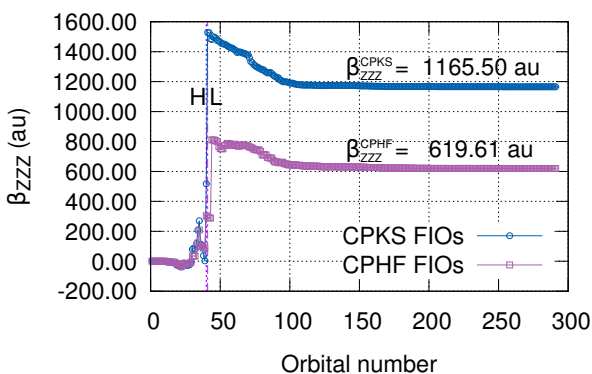

(c) CPKS- and CPHF-FIOs decomposition of  $\beta_{ZZZ}$  into MOs.

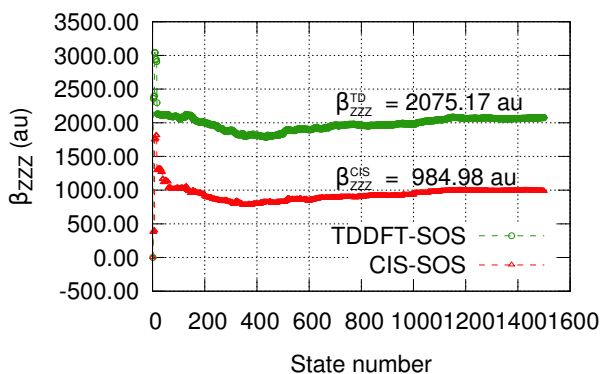

(d) TDDFT- and CIS-SOS decomposition of  $\beta_{ZZZ}$  into states.

Figure S31: (continued) For *p*-methoxy-nitrobenzene molecule and 6-311++G(d,p) basis set, variation of  $\alpha_{ZZ}$  (top) and  $\beta_{ZZZ}$  (middle) with respect to the number of orbitals (FIOs decomposition presented in this work, in Plots S31a and S31b) or states (SOS approaches, in Plots S31c and S31d). For  $\alpha$  FIOs, three approaches were considered: CPKS, CPHF and UPHF. For  $\beta$  FIOs, the results of CPKS and CPHF approaches are provided. Besides, a shorten range of number of orbitals/states can be seen in Plots S31e and S31f as well (bottom). All elements of the  $\beta$  tensor were recomputed with an error less than 0.51 au in the case of the FIOs. For SOS approach, TDDFT (CAM-B3LYP) and CIS methods were employed. Recomputed values of  $\alpha_{ZZ}$  and  $\beta_{ZZZ}$  for the different approaches are included in each plot. HOMO (H) and LUMO (L) are represented by blue and pink dotted lines, respectively.

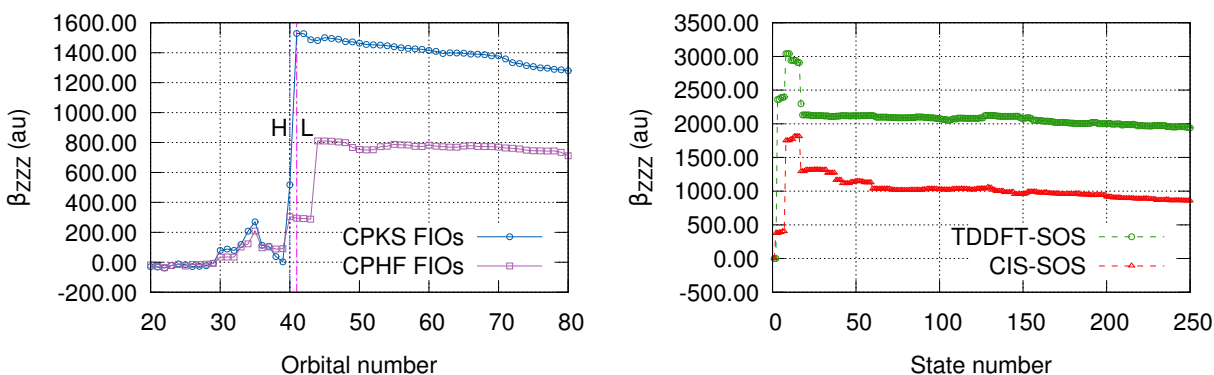

(e) CPKS- and CPHF-FIOs decomposition of  $\beta_{ZZZ}$  between MOs 20 and 70. (f) TDDFT- and CIS-SOS decomposition of  $\beta_{ZZZ}$  between states 1 and 250.

## 18.2.2 Main contributions from different excited states at TDDFT (CAM-B3LYP) approach

| #_exc.st | __symm__   | Exc.E  | Osc._Strength | __f__    | <S**2> | #CIs=2799  | #CIs>0=1065 | #CIs<0=1120 |        |       |
|----------|------------|--------|---------------|----------|--------|------------|-------------|-------------|--------|-------|
| 1        | Singlet-A" | 4.0301 | 307.65        | 0.0000   | 0.000  | Singlet-A" | 4.5769      | 270.89      | 0.0004 | 0.000 |
|          | max(1)=    |        | 38 -> 41      | 0.67612  |        | max(1)=    | 36 -> 41    | 0.67784     |        |       |
|          | max(2)=    |        | 38 -> 46      | 0.07207  |        | max(2)=    | 36 -> 46    | 0.06939     |        |       |
|          | max(3)=    |        | 38 -> 58      | 0.03313  |        | max(3)=    | 36 -> 58    | 0.03143     |        |       |
|          | max(4)=    |        | 38 -> 43      | 0.02194  |        | max(4)=    | 36 -> 43    | 0.02109     |        |       |
|          | max(5)=    |        | 38 -> 97      | 0.01694  |        | max(5)=    | 28 -> 41    | 0.01886     |        |       |
|          | min(1)=    |        | 38 -> 48      | -0.18123 |        | min(1)=    | 36 -> 48    | -0.17439    |        |       |
|          | min(2)=    |        | 35 -> 41      | -0.02622 |        | min(2)=    | 31 -> 41    | -0.02686    |        |       |
|          | min(3)=    |        | 38 -> 57      | -0.02058 |        | min(3)=    | 36 -> 57    | -0.01969    |        |       |
|          | min(4)=    |        | 30 -> 41      | -0.01747 |        | min(4)=    | 28 -> 48    | -0.01439    |        |       |
|          | min(5)=    |        | 38 -> 54      | -0.01287 |        | min(5)=    | 36 -> 54    | -0.01247    |        |       |

|   |            |           |             |             |       |            |          |        |          |       |
|---|------------|-----------|-------------|-------------|-------|------------|----------|--------|----------|-------|
|   |            | #CIs=2815 | #CIs>0=1204 | #CIs<0=1114 | 6     | Singlet-A" | 6.3456   | 195.39 | 0.0153   | 0.000 |
|   |            |           |             |             |       | max(1)=    | 40 -> 42 |        | 0.64733  |       |
| 3 | Singlet-A' | 4.6655    | 265.75      | 0.3377      | 0.000 | max(2)=    | 40 -> 45 |        | 0.13022  |       |
|   |            | max(1)=   | 40 -> 41    | 0.68869     |       | max(3)=    | 40 -> 44 |        | 0.12554  |       |
|   |            | max(2)=   | 34 -> 48    | 0.04650     |       | max(4)=    | 40 -> 56 |        | 0.10508  |       |
|   |            | max(3)=   | 32 -> 41    | 0.03304     |       | max(5)=    | 40 -> 50 |        | 0.10036  |       |
|   |            | max(4)=   | 36 -> 75    | 0.01424     |       | min(1)=    | 39 -> 42 |        | -0.04343 |       |
|   |            | max(5)=   | 37 -> 43    | 0.01117     |       | min(2)=    | 40 -> 51 |        | -0.03984 |       |
|   |            | min(1)=   | 39 -> 43    | -0.09737    |       | min(3)=    | 34 -> 45 |        | -0.03592 |       |
|   |            | min(2)=   | 34 -> 41    | -0.09645    |       | min(4)=    | 40 -> 60 |        | -0.02224 |       |
|   |            | min(3)=   | 32 -> 48    | -0.01966    |       | min(5)=    | 40 -> 52 |        | -0.01912 |       |
|   |            | min(4)=   | 34 -> 43    | -0.01226    |       |            |          |        |          |       |
|   |            | min(5)=   | 37 -> 86    | -0.01198    |       |            |          |        |          |       |
|   |            | #CIs=4451 | #CIs>0=2002 | #CIs<0=1980 | 7     | Singlet-A' | 6.4800   | 191.33 | 0.1925   | 0.000 |
|   |            |           |             |             |       | max(1)=    | 37 -> 41 |        | 0.66115  |       |
| 4 | Singlet-A' | 4.9848    | 248.72      | 0.0013      | 0.000 | max(2)=    | 40 -> 48 |        | 0.06831  |       |
|   |            | max(1)=   | 39 -> 41    | 0.55676     |       | max(3)=    | 39 -> 41 |        | 0.06545  |       |
|   |            | max(2)=   | 40 -> 43    | 0.41162     |       | max(4)=    | 38 ->109 |        | 0.04083  |       |
|   |            | max(3)=   | 39 -> 48    | 0.10910     |       | max(5)=    | 34 -> 41 |        | 0.03239  |       |
|   |            | max(4)=   | 37 -> 41    | 0.04036     |       | min(1)=    | 40 -> 43 |        | -0.14305 |       |
|   |            | max(5)=   | 40 -> 48    | 0.02276     |       | min(2)=    | 39 -> 43 |        | -0.08166 |       |
|   |            | min(1)=   | 34 -> 43    | -0.04580    |       | min(3)=    | 39 -> 48 |        | -0.05865 |       |
|   |            | min(2)=   | 39 -> 46    | -0.04157    |       | min(4)=    | 37 -> 48 |        | -0.05592 |       |
|   |            | min(3)=   | 39 -> 65    | -0.02292    |       | min(5)=    | 34 -> 43 |        | -0.04068 |       |
|   |            | min(4)=   | 39 -> 53    | -0.01856    |       |            |          |        |          |       |
|   |            | min(5)=   | 39 -> 43    | -0.01781    |       |            |          |        |          |       |
|   |            | #CIs=4453 | #CIs>0=1940 | #CIs<0=1950 | 8     | Singlet-A' | 6.5823   | 188.36 | 0.0921   | 0.000 |
|   |            |           |             |             |       | max(1)=    | 39 -> 43 |        | 0.49637  |       |
| 5 | Singlet-A' | 5.8296    | 212.68      | 0.0727      | 0.000 | max(2)=    | 40 -> 46 |        | 0.22150  |       |
|   |            | max(1)=   | 40 -> 43    | 0.52325     |       | max(3)=    | 37 -> 41 |        | 0.11606  |       |
|   |            | max(2)=   | 37 -> 41    | 0.16026     |       | max(4)=    | 40 -> 41 |        | 0.05619  |       |
|   |            | max(3)=   | 39 -> 48    | 0.11622     |       | max(5)=    | 32 -> 41 |        | 0.05603  |       |
|   |            | max(4)=   | 40 -> 46    | 0.02045     |       | min(1)=    | 40 -> 48 |        | -0.39922 |       |
|   |            | max(5)=   | 32 -> 41    | 0.01426     |       | min(2)=    | 34 -> 41 |        | -0.11344 |       |
|   |            | min(1)=   | 39 -> 41    | -0.42632    |       | min(3)=    | 39 -> 48 |        | -0.01776 |       |
|   |            | min(2)=   | 39 -> 53    | -0.03907    |       | min(4)=    | 40 -> 58 |        | -0.01445 |       |
|   |            | min(3)=   | 39 -> 43    | -0.02866    |       | min(5)=    | 34 -> 74 |        | -0.01399 |       |
|   |            | min(4)=   | 39 -> 46    | -0.02284    |       |            |          |        |          |       |
|   |            | min(5)=   | 34 -> 41    | -0.02225    |       |            |          |        |          |       |
|   |            | #CIs=4451 | #CIs>0=1933 | #CIs<0=2027 | 9     | Singlet-A" | 6.8634   | 180.64 | 0.0001   | 0.000 |
|   |            |           |             |             |       | max(1)=    | 40 -> 44 |        | 0.60394  |       |

|    |            |                                   |          |          |       |            |        |                                   |          |          |
|----|------------|-----------------------------------|----------|----------|-------|------------|--------|-----------------------------------|----------|----------|
|    |            | max(2)=                           | 40 -> 50 | 0.17378  |       |            |        | max(4)=                           | 38 -> 41 | 0.03411  |
|    |            | max(3)=                           | 39 -> 42 | 0.15203  |       |            |        | max(5)=                           | 28 -> 43 | 0.02925  |
|    |            | max(4)=                           | 40 -> 47 | 0.12851  |       |            |        | min(1)=                           | 33 -> 41 | -0.27420 |
|    |            | max(5)=                           | 40 -> 49 | 0.08067  |       |            |        | min(2)=                           | 29 -> 41 | -0.06219 |
|    |            | min(1)=                           | 40 -> 42 | -0.14861 |       |            |        | min(3)=                           | 35 -> 46 | -0.06137 |
|    |            | min(2)=                           | 40 -> 60 | -0.09906 |       |            |        | min(4)=                           | 31 -> 41 | -0.04126 |
|    |            | min(3)=                           | 40 -> 45 | -0.05847 |       |            |        | min(5)=                           | 36 -> 43 | -0.03636 |
|    |            | min(4)=                           | 40 -> 71 | -0.03000 |       |            |        | #CIs=2818 #CIs>0=1239 #CIs<0=1272 |          |          |
|    |            | min(5)=                           | 40 -> 56 | -0.02663 |       |            |        |                                   |          |          |
|    |            | #CIs=2819 #CIs>0=1195 #CIs<0=1172 |          |          | 13    | Singlet-A" | 7.2331 | 171.41                            | 0.0004   | 0.000    |
| 10 | Singlet-A" | 7.0788                            | 175.15   | 0.0021   | 0.000 |            |        | max(1)=                           | 39 -> 42 | 0.49158  |
|    |            | max(1)=                           | 40 -> 45 | 0.61872  |       |            |        | max(2)=                           | 39 -> 45 | 0.25476  |
|    |            | max(2)=                           | 40 -> 44 | 0.10334  |       |            |        | max(3)=                           | 39 -> 44 | 0.14370  |
|    |            | max(3)=                           | 39 -> 44 | 0.05688  |       |            |        | max(4)=                           | 40 -> 42 | 0.13192  |
|    |            | max(4)=                           | 40 -> 61 | 0.05206  |       |            |        | max(5)=                           | 39 -> 56 | 0.09789  |
|    |            | max(5)=                           | 40 -> 56 | 0.04704  |       |            |        | min(1)=                           | 40 -> 50 | -0.25576 |
|    |            | min(1)=                           | 40 -> 49 | -0.14969 |       |            |        | min(2)=                           | 40 -> 47 | -0.17130 |
|    |            | min(2)=                           | 40 -> 50 | -0.13099 |       |            |        | min(3)=                           | 40 -> 45 | -0.12935 |
|    |            | min(3)=                           | 40 -> 47 | -0.11137 |       |            |        | min(4)=                           | 40 -> 49 | -0.05762 |
|    |            | min(4)=                           | 40 -> 42 | -0.09398 |       |            |        | min(5)=                           | 40 -> 55 | -0.04840 |
|    |            | min(5)=                           | 40 -> 59 | -0.09289 |       |            |        | #CIs=2820 #CIs>0=1230 #CIs<0=1195 |          |          |
|    |            | #CIs=2814 #CIs>0=1193 #CIs<0=1195 |          |          | 14    | Singlet-A" | 7.3079 | 169.66                            | 0.0004   | 0.000    |
| 11 | Singlet-A' | 7.1549                            | 173.29   | 0.4820   | 0.000 |            |        | max(1)=                           | 40 -> 50 | 0.41409  |
|    |            | max(1)=                           | 39 -> 43 | 0.45938  |       |            |        | max(2)=                           | 39 -> 42 | 0.30174  |
|    |            | max(2)=                           | 40 -> 48 | 0.42136  |       |            |        | max(3)=                           | 40 -> 47 | 0.25805  |
|    |            | max(3)=                           | 34 -> 41 | 0.24928  |       |            |        | max(4)=                           | 40 -> 45 | 0.16131  |
|    |            | max(4)=                           | 40 -> 41 | 0.09324  |       |            |        | max(5)=                           | 39 -> 45 | 0.13968  |
|    |            | max(5)=                           | 34 -> 48 | 0.04544  |       |            |        | min(1)=                           | 40 -> 44 | -0.27780 |
|    |            | min(1)=                           | 40 -> 46 | -0.13900 |       |            |        | min(2)=                           | 40 -> 52 | -0.06599 |
|    |            | min(2)=                           | 40 -> 54 | -0.04478 |       |            |        | min(3)=                           | 39 -> 44 | -0.05174 |
|    |            | min(3)=                           | 32 -> 41 | -0.04055 |       |            |        | min(4)=                           | 40 -> 42 | -0.05164 |
|    |            | min(4)=                           | 40 -> 53 | -0.04017 |       |            |        | min(5)=                           | 34 -> 42 | -0.04168 |
|    |            | min(5)=                           | 34 -> 43 | -0.02576 |       |            |        | #CIs=2818 #CIs>0=1275 #CIs<0=1211 |          |          |
|    |            | #CIs=4448 #CIs>0=1978 #CIs<0=1989 |          |          | 15    | Singlet-A' | 7.4243 | 167.00                            | 0.0118   | 0.000    |
| 12 | Singlet-A" | 7.1634                            | 173.08   | 0.0001   | 0.000 |            |        | max(1)=                           | 40 -> 46 | 0.61644  |
|    |            | max(1)=                           | 35 -> 41 | 0.61247  |       |            |        | max(2)=                           | 40 -> 48 | 0.25621  |
|    |            | max(2)=                           | 35 -> 48 | 0.15640  |       |            |        | max(3)=                           | 34 -> 46 | 0.05892  |
|    |            | max(3)=                           | 38 -> 48 | 0.03829  |       |            |        | max(4)=                           | 34 -> 54 | 0.02950  |
|    |            |                                   |          |          |       |            |        | max(5)=                           | 40 -> 65 | 0.02038  |

|    |            |                                   |          |          |       |            |                                   |          |          |       |  |
|----|------------|-----------------------------------|----------|----------|-------|------------|-----------------------------------|----------|----------|-------|--|
|    |            | min(1)=                           | 40 -> 53 | -0.15894 |       |            | max(3)=                           | 40 -> 53 | 0.09348  |       |  |
|    |            | min(2)=                           | 40 -> 58 | -0.09569 |       |            | max(4)=                           | 39 -> 53 | 0.04460  |       |  |
|    |            | min(3)=                           | 39 -> 43 | -0.06345 |       |            | max(5)=                           | 40 -> 41 | 0.03375  |       |  |
|    |            | min(4)=                           | 39 -> 46 | -0.05092 |       |            | min(1)=                           | 39 -> 46 | -0.32247 |       |  |
|    |            | min(5)=                           | 40 -> 70 | -0.03678 |       |            | min(2)=                           | 40 -> 48 | -0.15014 |       |  |
|    |            | #CIs=4431 #CIs>0=1770 #CIs<0=1825 |          |          |       |            | min(3)=                           | 40 -> 43 | -0.13385 |       |  |
| 16 | Singlet-A" | 7.4766                            | 165.83   | 0.0000   | 0.000 |            | min(4)=                           | 34 -> 43 | -0.13256 |       |  |
|    |            | max(1)=                           | 38 -> 43 | 0.69260  |       |            | min(5)=                           | 32 -> 41 | -0.07470 |       |  |
|    |            | max(2)=                           | 35 -> 43 | 0.07815  |       |            | #CIs=4443 #CIs>0=1926 #CIs<0=1995 |          |          |       |  |
|    |            | max(3)=                           | 30 -> 43 | 0.04095  | 19    | Singlet-A" | 7.7200                            | 160.60   | 0.0130   | 0.000 |  |
|    |            | max(4)=                           | 38 -> 46 | 0.03919  |       |            | max(1)=                           | 39 -> 44 | 0.45546  |       |  |
|    |            | max(5)=                           | 31 -> 41 | 0.02549  |       |            | max(2)=                           | 40 -> 47 | 0.30224  |       |  |
|    |            | min(1)=                           | 33 -> 41 | -0.03325 |       |            | max(3)=                           | 40 -> 49 | 0.28181  |       |  |
|    |            | min(2)=                           | 38 -> 41 | -0.03220 |       |            | max(4)=                           | 39 -> 50 | 0.10045  |       |  |
|    |            | min(3)=                           | 38 -> 54 | -0.02708 |       |            | max(5)=                           | 40 -> 52 | 0.09736  |       |  |
|    |            | min(4)=                           | 36 -> 48 | -0.02334 |       |            | min(1)=                           | 40 -> 50 | -0.19210 |       |  |
|    |            | min(5)=                           | 33 -> 43 | -0.02161 |       |            | min(2)=                           | 40 -> 51 | -0.08793 |       |  |
|    |            | #CIs=2812 #CIs>0=1204 #CIs<0=1163 |          |          |       |            | min(3)=                           | 39 -> 60 | -0.07783 |       |  |
| 17 | Singlet-A' | 7.6496                            | 162.08   | 0.0893   | 0.000 |            | min(4)=                           | 40 -> 42 | -0.07371 |       |  |
|    |            | max(1)=                           | 34 -> 41 | 0.53837  |       |            | min(5)=                           | 40 -> 44 | -0.07293 |       |  |
|    |            | max(2)=                           | 39 -> 46 | 0.18040  |       |            | #CIs=2815 #CIs>0=1227 #CIs<0=1255 |          |          |       |  |
|    |            | max(3)=                           | 40 -> 46 | 0.10485  | 20    | Singlet-A" | 7.7763                            | 159.44   | 0.0171   | 0.000 |  |
|    |            | max(4)=                           | 40 -> 43 | 0.08529  |       |            | max(1)=                           | 39 -> 44 | 0.39781  |       |  |
|    |            | max(5)=                           | 40 -> 41 | 0.07290  |       |            | max(2)=                           | 40 -> 50 | 0.33177  |       |  |
|    |            | min(1)=                           | 39 -> 48 | -0.23496 |       |            | max(3)=                           | 40 -> 51 | 0.08126  |       |  |
|    |            | min(2)=                           | 40 -> 48 | -0.20826 |       |            | max(4)=                           | 39 -> 50 | 0.07246  |       |  |
|    |            | min(3)=                           | 32 -> 41 | -0.16141 |       |            | max(5)=                           | 40 -> 55 | 0.07031  |       |  |
|    |            | min(4)=                           | 39 -> 43 | -0.08881 |       |            | min(1)=                           | 40 -> 47 | -0.38169 |       |  |
|    |            | min(5)=                           | 37 -> 43 | -0.06543 |       |            | min(2)=                           | 40 -> 52 | -0.12976 |       |  |
|    |            | #CIs=4451 #CIs>0=2034 #CIs<0=1954 |          |          |       |            | min(3)=                           | 39 -> 42 | -0.11391 |       |  |
| 18 | Singlet-A' | 7.6903                            | 161.22   | 0.1834   | 0.000 |            | min(4)=                           | 39 -> 60 | -0.06045 |       |  |
|    |            | max(1)=                           | 39 -> 48 | 0.48646  |       |            | min(5)=                           | 40 -> 45 | -0.05422 |       |  |
|    |            | max(2)=                           | 34 -> 41 | 0.25947  |       |            | #CIs=2818 #CIs>0=1243 #CIs<0=1216 |          |          |       |  |

### 18.2.3 Main contributions from different excited states at CIS approach



| #_exc.st | ___symm___ | Exc.E  | Osc._Strength | ___f___ | _ <del>S</del> *2>_ | Singlet-A'                        | 5.9273   | 209.18     | 0.0051   | 0.000  |        |       |
|----------|------------|--------|---------------|---------|---------------------|-----------------------------------|----------|------------|----------|--------|--------|-------|
| 1        | Singlet-A" | 5.4417 | 227.84        | 0.0000  | 0.000               | max(1)=                           | 40 -> 49 |            | 0.46402  |        |        |       |
|          |            |        |               |         |                     | max(2)=                           | 39 -> 55 |            | 0.11611  |        |        |       |
|          |            |        |               |         |                     | max(3)=                           | 40 -> 57 |            | 0.07390  |        |        |       |
|          |            |        |               |         |                     | max(4)=                           | 40 -> 52 |            | 0.06926  |        |        |       |
|          |            |        |               |         |                     | max(5)=                           | 40 -> 69 |            | 0.06310  |        |        |       |
|          |            |        |               |         |                     | min(1)=                           | 39 -> 44 |            | -0.46429 |        |        |       |
|          |            |        |               |         |                     | min(2)=                           | 40 -> 44 |            | -0.09742 |        |        |       |
|          |            |        |               |         |                     | min(3)=                           | 39 -> 65 |            | -0.09139 |        |        |       |
|          |            |        |               |         |                     | min(4)=                           | 40 -> 68 |            | -0.06034 |        |        |       |
|          |            |        |               |         |                     | min(5)=                           | 39 -> 49 |            | -0.04954 |        |        |       |
|          |            |        |               |         |                     | #CIs=4237 #CIs>0=1921 #CIs<0=2079 |          |            |          |        |        |       |
|          |            |        |               |         |                     | #CIs=2612 #CIs>0=1158 #CIs<0=1156 | 5        | Singlet-A" | 6.9182   | 179.21 | 0.0204 | 0.000 |
|          |            |        |               |         |                     | max(1)=                           | 40 -> 41 |            | 0.53951  |        |        |       |
| 2        | Singlet-A' | 5.7590 | 215.29        | 0.2717  | 0.000               | max(2)=                           | 40 -> 43 |            | 0.29808  |        |        |       |
|          |            |        |               |         |                     | max(3)=                           | 40 -> 48 |            | 0.15344  |        |        |       |
|          |            |        |               |         |                     | max(4)=                           | 40 -> 54 |            | 0.12210  |        |        |       |
|          |            |        |               |         |                     | max(5)=                           | 40 -> 61 |            | 0.05593  |        |        |       |
|          |            |        |               |         |                     | min(1)=                           | 40 -> 50 |            | -0.16048 |        |        |       |
|          |            |        |               |         |                     | min(2)=                           | 40 -> 56 |            | -0.13192 |        |        |       |
|          |            |        |               |         |                     | min(3)=                           | 39 -> 42 |            | -0.07691 |        |        |       |
|          |            |        |               |         |                     | min(4)=                           | 40 -> 42 |            | -0.06092 |        |        |       |
|          |            |        |               |         |                     | min(5)=                           | 39 -> 41 |            | -0.05089 |        |        |       |
|          |            |        |               |         |                     | #CIs=2666 #CIs>0=1213 #CIs<0=1210 |          |            |          |        |        |       |
|          |            |        |               |         |                     | #CIs=4323 #CIs>0=2038 #CIs<0=2064 | 6        | Singlet-A' | 7.2310   | 171.46 | 0.0443 | 0.000 |
|          |            |        |               |         |                     | max(1)=                           | 38 -> 44 |            | 0.40097  |        |        |       |
| 3        | Singlet-A" | 5.7760 | 214.66        | 0.0004  | 0.000               | max(2)=                           | 38 -> 55 |            | 0.15162  |        |        |       |
|          |            |        |               |         |                     | max(3)=                           | 38 -> 53 |            | 0.08027  |        |        |       |
|          |            |        |               |         |                     | max(4)=                           | 38 -> 68 |            | 0.04275  |        |        |       |
|          |            |        |               |         |                     | max(5)=                           | 38 -> 52 |            | 0.04169  |        |        |       |
|          |            |        |               |         |                     | min(1)=                           | 39 -> 44 |            | -0.37360 |        |        |       |
|          |            |        |               |         |                     | min(2)=                           | 40 -> 49 |            | -0.34379 |        |        |       |
|          |            |        |               |         |                     | min(3)=                           | 38 -> 60 |            | -0.07751 |        |        |       |
|          |            |        |               |         |                     | min(4)=                           | 38 -> 65 |            | -0.06061 |        |        |       |
|          |            |        |               |         |                     | min(5)=                           | 38 -> 45 |            | -0.05084 |        |        |       |
|          |            |        |               |         |                     | #CIs=4276 #CIs>0=2020 #CIs<0=2056 |          |            |          |        |        |       |
|          |            |        |               |         |                     | #CIs=2667 #CIs>0=1210 #CIs<0=1215 | 7        | Singlet-A" | 7.3532   | 168.61 | 0.0003 | 0.000 |
|          |            |        |               |         |                     | max(1)=                           | 39 -> 41 |            | 0.38704  |        |        |       |

|    |             |        |                                   |          |          |    |             |        |                                   |          |          |
|----|-------------|--------|-----------------------------------|----------|----------|----|-------------|--------|-----------------------------------|----------|----------|
|    |             |        | max(2)=                           | 39 -> 43 | 0.28650  |    |             |        | max(4)=                           | 40 -> 54 | 0.12104  |
|    |             |        | max(3)=                           | 40 -> 43 | 0.12592  |    |             |        | max(5)=                           | 40 -> 48 | 0.11890  |
|    |             |        | max(4)=                           | 39 -> 54 | 0.09573  |    |             |        | min(1)=                           | 40 -> 41 | -0.29797 |
|    |             |        | max(5)=                           | 40 -> 48 | 0.07344  |    |             |        | min(2)=                           | 40 -> 51 | -0.18154 |
|    |             |        | min(1)=                           | 40 -> 42 | -0.40149 |    |             |        | min(3)=                           | 39 -> 43 | -0.09425 |
|    |             |        | min(2)=                           | 39 -> 56 | -0.13192 |    |             |        | min(4)=                           | 40 -> 58 | -0.09237 |
|    |             |        | min(3)=                           | 40 -> 59 | -0.11795 |    |             |        | min(5)=                           | 35 -> 41 | -0.08849 |
|    |             |        | min(4)=                           | 40 -> 41 | -0.11630 |    |             |        | #CIs=2677 #CIs>0=1239 #CIs<0=1223 |          |          |
|    |             |        | min(5)=                           | 39 -> 50 | -0.07058 |    |             |        |                                   |          |          |
|    |             |        | #CIs=2655 #CIs>0=1188 #CIs<0=1184 |          |          | 11 | Singlet-A'  | 7.8317 | 158.31                            | 0.8939   | 0.000    |
| 8  | Singlet-A'  | 7.4607 |                                   |          |          |    |             |        | max(1)=                           | 38 -> 44 | 0.43510  |
|    |             |        | max(1)=                           | 39 -> 49 | 0.52800  |    |             |        | max(2)=                           | 39 -> 44 | 0.31852  |
|    |             |        | max(2)=                           | 40 -> 45 | 0.12052  |    |             |        | max(3)=                           | 40 -> 49 | 0.29890  |
|    |             |        | max(3)=                           | 40 -> 49 | 0.10690  |    |             |        | max(4)=                           | 38 -> 55 | 0.14301  |
|    |             |        | max(4)=                           | 40 -> 65 | 0.10093  |    |             |        | max(5)=                           | 38 -> 53 | 0.07932  |
|    |             |        | max(5)=                           | 38 -> 44 | 0.08678  |    |             |        | min(1)=                           | 39 -> 49 | -0.10908 |
|    |             |        | min(1)=                           | 40 -> 44 | -0.23406 |    |             |        | min(2)=                           | 38 -> 60 | -0.08179 |
|    |             |        | min(2)=                           | 40 -> 55 | -0.19049 |    |             |        | min(3)=                           | 40 -> 45 | -0.07872 |
|    |             |        | min(3)=                           | 40 -> 53 | -0.10875 |    |             |        | min(4)=                           | 39 -> 52 | -0.07098 |
|    |             |        | min(4)=                           | 39 -> 45 | -0.08302 |    |             |        | min(5)=                           | 39 -> 53 | -0.05942 |
|    |             |        | min(5)=                           | 40 -> 52 | -0.07993 |    |             |        | #CIs=4294 #CIs>0=2031 #CIs<0=2056 |          |          |
|    |             |        | #CIs=4316 #CIs>0=2025 #CIs<0=2083 |          |          | 12 | Singlet-A'' | 7.8498 | 157.94                            | 0.0028   | 0.000    |
| 9  | Singlet-A'' | 7.6934 |                                   |          |          |    |             |        | max(1)=                           | 39 -> 42 | 0.36451  |
|    |             |        | max(1)=                           | 40 -> 42 | 0.47577  |    |             |        | max(2)=                           | 40 -> 48 | 0.35346  |
|    |             |        | max(2)=                           | 39 -> 41 | 0.31673  |    |             |        | max(3)=                           | 39 -> 59 | 0.11836  |
|    |             |        | max(3)=                           | 39 -> 43 | 0.23904  |    |             |        | max(4)=                           | 39 -> 41 | 0.11813  |
|    |             |        | max(4)=                           | 40 -> 41 | 0.14332  |    |             |        | max(5)=                           | 40 -> 54 | 0.09701  |
|    |             |        | max(5)=                           | 39 -> 54 | 0.11718  |    |             |        | min(1)=                           | 40 -> 43 | -0.26168 |
|    |             |        | min(1)=                           | 39 -> 50 | -0.11336 |    |             |        | min(2)=                           | 40 -> 50 | -0.25083 |
|    |             |        | min(2)=                           | 40 -> 48 | -0.09826 |    |             |        | min(3)=                           | 39 -> 43 | -0.07811 |
|    |             |        | min(3)=                           | 39 -> 56 | -0.08577 |    |             |        | min(4)=                           | 39 -> 48 | -0.05394 |
|    |             |        | min(4)=                           | 39 -> 51 | -0.04678 |    |             |        | min(5)=                           | 40 -> 82 | -0.05046 |
|    |             |        | min(5)=                           | 35 -> 46 | -0.04517 |    |             |        | #CIs=2692 #CIs>0=1264 #CIs<0=1220 |          |          |
|    |             |        | #CIs=2694 #CIs>0=1211 #CIs<0=1231 |          |          | 13 | Singlet-A'  | 8.0037 | 154.91                            | 0.0064   | 0.000    |
| 10 | Singlet-A'  | 7.8093 |                                   |          |          |    |             |        | max(1)=                           | 40 -> 45 | 0.58291  |
|    |             |        | max(1)=                           | 40 -> 43 | 0.44909  |    |             |        | max(2)=                           | 40 -> 44 | 0.14178  |
|    |             |        | max(2)=                           | 40 -> 47 | 0.24365  |    |             |        | max(3)=                           | 40 -> 55 | 0.08463  |
|    |             |        | max(3)=                           | 40 -> 42 | 0.14855  |    |             |        | max(4)=                           | 40 -> 49 | 0.07134  |
|    |             |        |                                   |          |          |    |             |        | max(5)=                           | 35 -> 45 | 0.04660  |



|    |            |                                   |          |          |       |                                   |          |          |
|----|------------|-----------------------------------|----------|----------|-------|-----------------------------------|----------|----------|
|    |            | min(5)=                           | 39 -> 50 | -0.05533 |       | max(5)=                           | 39 -> 69 | 0.03783  |
|    |            | #CIs=2699 #CIs>0=1227 #CIs<0=1238 |          |          |       | min(1)=                           | 39 -> 53 | -0.27774 |
|    |            |                                   |          |          |       | min(2)=                           | 40 -> 52 | -0.20099 |
| 20 | Singlet-A' | 8.6992                            | 142.52   | 0.0135   | 0.000 | min(3)=                           | 39 -> 52 | -0.18626 |
|    |            | max(1)=                           | 39 -> 45 | 0.52645  |       | min(4)=                           | 39 -> 57 | -0.08587 |
|    |            | max(2)=                           | 39 -> 49 | 0.13107  |       | min(5)=                           | 40 -> 49 | -0.06516 |
|    |            | max(3)=                           | 40 -> 55 | 0.09209  |       | #CIs=4215 #CIs>0=1984 #CIs<0=1977 |          |          |
|    |            | max(4)=                           | 40 -> 57 | 0.04490  |       |                                   |          |          |
